# Supplementary material for: Adjusting the Prerelease Gut Microbial Community by Diet Training to Improve the Postrelease Fitness of Captive-Bred Acipenser dabryanus
Source: Front Microbiol. 2020 Apr 21;11:488. doi: 10.3389/fmicb.2020.00488 (PMC7186344; doi:10.3389/fmicb.2020.00488)
Supplement: DATA SHEET S1 — OTU Table showed the details of gut microbial composition of all samples. [file Data_Sheet_1.xls]

## Sheet: OTU table
Domain	Kingdom	Phylum	Class	Order	Family	Genus	Species	OTU	AQY_1	AQY_2	AQY_3	ASL_1	ASL_2	ASL_3	BQY_1	BQY_2	BQY_3	BSL_1	BSL_2	BSL_3	CQY_1	CQY_2	CQY_3	CSL_1	CSL_2	CSL_3	H_QY_NRW1	H_QY_NRW2	H_QY_NRW3	H_QY_NRW4	H_QY_NRW5	H_SL_NRW1	H_SL_NRW2	H_SL_NRW3	H_SL_NRW4	H_SL_NRW5	QY_NRW1	QY_NRW2	QY_NRW3	QY_NRW4	QY_NRW5	SL_NRW1	SL_NRW2	SL_NRW3	SL_NRW4	SL_NRW5	SUM
d__Bacteria	k__norank	p__Proteobacteria	c__Betaproteobacteria	o__TRA3-20	f__norank_o__TRA3-20	g__norank_o__TRA3-20	s__uncultured_Oxalobacteraceae_bacterium_g__norank_o__TRA3-20	OTU511	0	0	16	0	0	0	0	0	0	0	0	0	0	0	0	0	0	0	0	0	0	0	0	0	0	0	0	0	0	0	0	0	0	0	0	0	0	0	16
d__Bacteria	k__norank	p__Acidobacteria	c__Acidobacteria	o__norank_c__Acidobacteria	f__norank_c__Acidobacteria	g__norank_c__Acidobacteria	s__unclassified_g__norank_c__Acidobacteria	OTU1116	16	5	10	2	12	5	0	0	0	0	0	0	0	0	0	0	0	0	0	0	0	0	0	0	0	0	0	0	0	0	0	0	0	0	0	0	0	0	50
d__Bacteria	k__norank	p__Bacteroidetes	c__Bacteroidia	o__Bacteroidales	f__Prevotellaceae	g__Prevotella_1	s__uncultured_rumen_bacterium_g__Prevotella_1	OTU677	0	1	0	9	7	3	0	0	0	0	0	0	0	0	0	0	0	0	0	0	0	0	0	0	0	0	0	0	0	0	0	0	0	0	0	0	0	0	20
d__Bacteria	k__norank	p__Firmicutes	c__Clostridia	o__Clostridiales	f__Ruminococcaceae	g__Saccharofermentans	s__unclassified_g__Saccharofermentans	OTU934	0	0	0	0	12	0	0	0	0	0	0	0	0	0	0	0	0	0	0	0	0	0	0	0	0	0	0	0	0	0	0	0	0	0	0	0	0	0	12
d__Bacteria	k__norank	p__Bacteroidetes	c__Bacteroidia	o__Bacteroidales	f__Bacteroidales_BS11_gut_group	g__norank_f__Bacteroidales_BS11_gut_group	s__unclassified_g__norank_f__Bacteroidales_BS11_gut_group	OTU820	0	0	0	0	11	0	0	0	0	0	0	0	0	0	0	0	0	0	0	0	0	0	0	0	0	0	0	0	0	0	0	0	0	0	0	0	0	0	11
d__Bacteria	k__norank	p__Firmicutes	c__Bacilli	o__Lactobacillales	f__Aerococcaceae	g__Aerococcus	s__unclassified_g__Aerococcus	OTU958	0	0	0	0	6	0	0	0	0	0	0	0	0	0	0	0	0	0	1	0	0	0	0	0	0	0	0	0	0	0	0	0	0	0	0	0	0	0	7
d__Bacteria	k__norank	p__Bacteroidetes	c__Bacteroidia	o__Bacteroidales	f__Bacteroidales_S24-7_group	g__norank_f__Bacteroidales_S24-7_group	s__uncultured_rumen_bacterium_g__norank_f__Bacteroidales_S24-7_group	OTU906	0	0	21	1	53	10	0	0	0	0	0	0	0	0	0	0	0	0	0	0	0	0	0	0	0	0	0	0	0	0	0	0	0	0	0	0	0	0	85
d__Bacteria	k__norank	p__Cyanobacteria	c__Cyanobacteria	o__norank_c__Cyanobacteria	f__norank_c__Cyanobacteria	g__norank_c__Cyanobacteria	s__Euglena_viridis	OTU1901	0	0	0	0	0	0	0	0	0	0	0	0	0	0	0	0	0	0	0	0	1	0	0	0	1	0	0	0	0	0	0	0	0	0	0	0	0	0	2
d__Bacteria	k__norank	p__Proteobacteria	c__Alphaproteobacteria	o__Rhizobiales	f__MNG7	g__norank_f__MNG7	s__uncultured_bacterium_g__norank_f__MNG7	OTU1868	15	29	5	20	0	5	3	16	2	0	1	0	1	7	0	0	0	0	703	1074	1017	954	471	341	139	359	212	287	15	17	1	5	215	0	0	0	0	0	5914
d__Bacteria	k__norank	p__Proteobacteria	c__Epsilonproteobacteria	o__Campylobacterales	f__Helicobacteraceae	g__Wolinella	s__unclassified_g__Wolinella	OTU37	6	0	1	0	0	0	0	0	0	0	0	0	0	0	0	0	0	0	0	0	0	0	0	0	0	0	0	0	0	0	0	0	0	0	0	0	0	0	7
d__Bacteria	k__norank	p__Proteobacteria	c__Alphaproteobacteria	o__Rhizobiales	f__Rhizobiaceae	g__Neorhizobium	s__unclassified_g__Neorhizobium	OTU444	0	0	13	0	0	0	0	0	0	0	0	0	0	0	0	0	0	0	0	0	0	0	0	0	0	0	0	0	0	0	0	0	0	0	0	0	0	0	13
d__Bacteria	k__norank	p__Bacteroidetes	c__Bacteroidia	o__Bacteroidales	f__Rikenellaceae	g__Rikenellaceae_RC9_gut_group	s__unclassified_g__Rikenellaceae_RC9_gut_group	OTU841	0	0	0	0	30	0	0	0	0	0	0	0	0	0	0	0	0	0	0	0	0	0	0	0	0	0	0	0	0	0	0	0	0	0	0	0	0	0	30
d__Bacteria	k__norank	p__Firmicutes	c__Erysipelotrichia	o__Erysipelotrichales	f__Erysipelotrichaceae	g__norank_f__Erysipelotrichaceae	s__uncultured_rumen_bacterium_g__norank_f__Erysipelotrichaceae	OTU1133	0	0	0	0	0	7	0	0	0	0	0	0	0	0	0	0	0	0	0	0	0	0	0	0	0	0	0	0	0	0	0	0	0	0	0	0	0	0	7
d__Bacteria	k__norank	p__Firmicutes	c__Clostridia	o__Clostridiales	f__Ruminococcaceae	g__Saccharofermentans	s__unclassified_g__Saccharofermentans	OTU731	0	0	0	10	0	0	0	0	0	0	0	0	0	0	0	0	0	0	0	0	0	0	0	0	0	0	0	0	0	0	0	0	0	0	0	0	0	0	10
d__Bacteria	k__norank	p__Bacteroidetes	c__Bacteroidia	o__Bacteroidales	f__Bacteroidales_S24-7_group	g__norank_f__Bacteroidales_S24-7_group	s__uncultured_rumen_bacterium_g__norank_f__Bacteroidales_S24-7_group	OTU1013	0	0	1	0	23	18	0	0	0	0	0	0	0	0	0	0	0	0	0	0	0	0	0	0	0	0	0	0	0	0	0	0	0	0	0	0	0	0	42
d__Bacteria	k__norank	p__Firmicutes	c__Erysipelotrichia	o__Erysipelotrichales	f__Erysipelotrichaceae	g__Turicibacter	s__unclassified_g__Turicibacter	OTU2063	12	3	18	1	0	0	44	39	0	1	3	1	1	2	0	0	0	0	2	1	0	0	0	0	0	0	0	1	13	27	0	12	244	0	0	0	0	0	425
d__Bacteria	k__norank	p__Saccharibacteria	c__norank_p__Saccharibacteria	o__norank_p__Saccharibacteria	f__norank_p__Saccharibacteria	g__norank_p__Saccharibacteria	s__wastewater_metagenome_g__norank_p__Saccharibacteria	OTU1318	0	0	0	0	0	0	0	5	0	0	0	0	0	0	0	0	0	0	0	0	0	0	0	0	0	0	0	0	0	0	0	0	0	0	0	0	0	0	5
d__Bacteria	k__norank	p__Bacteroidetes	c__Bacteroidia	o__Bacteroidales	f__Prevotellaceae	g__Prevotellaceae_UCG-001	s__unclassified_g__Prevotellaceae_UCG-001	OTU722	0	3	98	36	356	83	0	0	0	0	0	0	0	0	0	0	0	0	0	0	0	0	0	0	0	0	0	0	0	0	0	0	0	0	0	0	0	0	576
d__Bacteria	k__norank	p__Chloroflexi	c__Anaerolineae	o__Anaerolineales	f__Anaerolineaceae	g__norank_f__Anaerolineaceae	s__anaerobic_bacterium_MO-CFX2	OTU323	0	0	8	0	0	0	0	0	1	0	0	0	0	0	0	0	0	0	0	0	0	0	0	0	0	0	0	0	0	0	0	0	0	0	0	0	0	0	9
d__Bacteria	k__norank	p__Proteobacteria	c__Alphaproteobacteria	o__Caulobacterales	f__Caulobacteraceae	g__Phenylobacterium	s__unclassified_g__Phenylobacterium	OTU528	0	0	12	0	0	0	0	0	0	0	0	0	0	0	0	0	0	0	0	0	0	0	0	0	0	0	0	0	0	0	0	0	0	0	0	0	0	0	12
d__Bacteria	k__norank	p__Bacteroidetes	c__Bacteroidia	o__Bacteroidales	f__Prevotellaceae	g__Prevotellaceae_NK3B31_group	s__unclassified_g__Prevotellaceae_NK3B31_group	OTU789	0	0	7	0	8	0	0	0	0	0	0	0	0	0	0	0	0	0	0	0	0	0	0	0	0	0	0	0	0	0	0	0	0	0	0	0	0	0	15
d__Bacteria	k__norank	p__Proteobacteria	c__Deltaproteobacteria	o__Desulfurellales	f__Desulfurellaceae	g__H16	s__unclassified_g__H16	OTU1535	0	0	0	0	0	0	0	0	0	0	0	0	0	2	0	0	0	0	8	5	8	5	7	3	1	1	1	1	0	0	0	0	0	0	0	0	0	0	42
d__Bacteria	k__norank	p__Proteobacteria	c__Alphaproteobacteria	o__Rhodospirillales	f__Rhodospirillaceae	g__norank_f__Rhodospirillaceae	s__uncultured_Dongia_sp._g__norank	OTU375	0	0	10	0	0	4	0	0	0	0	0	0	0	0	0	0	0	0	0	0	0	0	0	0	0	0	0	0	0	0	0	0	0	0	0	0	0	0	14
d__Bacteria	k__norank	p__Firmicutes	c__Clostridia	o__Clostridiales	f__Family_XIII	g__Anaerovorax	s__uncultured_rumen_bacterium_g__Anaerovorax	OTU864	0	0	0	0	15	6	0	0	0	0	0	0	0	0	0	0	0	0	0	0	0	0	0	0	0	0	0	0	0	0	0	0	0	0	0	0	0	0	21
d__Bacteria	k__norank	p__Bacteroidetes	c__Flavobacteriia	o__Flavobacteriales	f__Flavobacteriaceae	g__Flavobacterium	s__unclassified_g__Flavobacterium	OTU557	0	0	16	1	0	0	0	0	0	0	0	0	0	0	0	0	0	0	0	0	0	0	1	0	0	0	0	0	0	0	0	0	0	0	0	0	0	0	18
d__Bacteria	k__norank	p__Firmicutes	c__Erysipelotrichia	o__Erysipelotrichales	f__Erysipelotrichaceae	g__[Anaerorhabdus]_furcosa_group	s__uncultured_bacterium_g__[Anaerorhabdus]_furcosa_group	OTU1049	0	0	20	0	25	0	0	0	0	0	0	0	0	0	0	0	0	0	0	0	0	0	0	0	0	0	0	0	0	0	0	0	0	0	0	0	0	0	45
d__Bacteria	k__norank	p__Firmicutes	c__Clostridia	o__Clostridiales	f__Lachnospiraceae	g__Lachnospiraceae_UCG-010	s__uncultured_rumen_bacterium_g__Lachnospiraceae_UCG-010	OTU516	0	0	7	0	0	7	0	0	0	0	0	0	0	0	0	0	0	0	0	0	0	0	0	0	0	0	0	0	0	0	0	0	0	0	0	0	0	0	14
d__Bacteria	k__norank	p__Cyanobacteria	c__Cyanobacteria	o__norank_c__Cyanobacteria	f__norank_c__Cyanobacteria	g__norank_c__Cyanobacteria	s__Coelastrella_sp._M60_g__norank	OTU2091	0	0	0	0	0	0	0	0	0	0	0	0	0	0	0	0	0	0	0	0	0	0	0	0	0	0	0	0	0	0	0	2	4	0	0	0	0	0	6
d__Bacteria	k__norank	p__Chloroflexi	c__Anaerolineae	o__Anaerolineales	f__Anaerolineaceae	g__norank_f__Anaerolineaceae	s__unclassified_g__norank_f__Anaerolineaceae	OTU1577	0	0	0	0	0	0	0	0	0	0	0	0	0	0	0	0	0	0	1	6	17	0	0	3	0	2	0	3	0	0	0	0	0	0	0	0	0	0	32
d__Bacteria	k__norank	p__Proteobacteria	c__Gammaproteobacteria	o__Pseudomonadales	f__Moraxellaceae	g__Enhydrobacter	s__Moraxella_osloensis_g__Enhydrobacter	OTU804	5	5	27	11	11	17	0	2	0	0	0	1	0	1	0	0	0	0	0	0	0	0	2	0	0	0	0	0	0	0	0	0	0	0	1	0	1	0	84
d__Bacteria	k__norank	p__Firmicutes	c__Clostridia	o__Clostridiales	f__Eubacteriaceae	g__Anaerofustis	s__uncultured_bacterium_g__Anaerofustis	OTU335	0	0	6	7	0	0	0	0	0	0	0	0	0	0	0	0	0	0	0	0	0	0	0	0	0	0	0	0	0	0	0	0	0	0	0	0	0	0	13
d__Bacteria	k__norank	p__Parcubacteria	c__Candidatus_Moranbacteria	o__norank_c__Candidatus_Moranbacteria	f__norank_c__Candidatus_Moranbacteria	g__norank_c__Candidatus_Moranbacteria	s__uncultured_soil_bacterium_g__norank_c__Candidatus_Moranbacteria	OTU1873	0	0	0	0	0	0	0	0	0	0	0	0	0	0	0	0	0	0	4	6	4	1	0	0	2	0	0	0	0	0	0	0	0	0	0	0	0	0	17
d__Bacteria	k__norank	p__Proteobacteria	c__Alphaproteobacteria	o__Rhizobiales	f__Rhodobiaceae	g__norank_f__Rhodobiaceae	s__uncultured_Rhodobiaceae_bacterium_g__norank_f__Rhodobiaceae	OTU1840	0	0	0	0	0	1	0	0	1	0	0	0	0	0	0	0	0	0	5	6	20	1	4	2	0	1	0	0	0	1	0	1	7	0	0	0	0	0	50
d__Bacteria	k__norank	p__Proteobacteria	c__Alphaproteobacteria	o__Rhodospirillales	f__Acetobacteraceae	g__Roseococcus	s__uncultured_bacterium_g__Roseococcus	OTU1289	0	0	0	2	0	0	12	54	0	0	0	0	0	0	0	0	0	0	0	0	0	0	0	0	0	0	0	1	0	1	0	0	0	0	0	0	0	0	70
d__Bacteria	k__norank	p__Firmicutes	c__Clostridia	o__Clostridiales	f__Lachnospiraceae	g__Marvinbryantia	s__uncultured_rumen_bacterium_g__Marvinbryantia	OTU331	0	0	8	3	3	2	0	0	0	0	0	0	0	0	0	0	0	0	0	0	0	0	0	0	0	0	0	0	0	0	0	0	0	0	0	0	0	0	16
d__Bacteria	k__norank	p__Firmicutes	c__Clostridia	o__Clostridiales	f__Lachnospiraceae	g__Lachnospiraceae_NK4A136_group	s__uncultured_bacterium_g__Lachnospiraceae_NK4A136_group	OTU345	0	0	21	0	0	0	0	0	0	0	0	0	0	0	0	0	0	0	0	0	0	0	0	0	0	0	0	0	0	0	0	0	0	0	0	0	0	0	21
d__Bacteria	k__norank	p__Proteobacteria	c__Alphaproteobacteria	o__Rickettsiales	f__Holosporaceae	g__norank_f__Holosporaceae	s__unclassified_g__norank_f__Holosporaceae	OTU1947	0	0	0	0	0	0	0	0	0	0	0	0	0	0	0	0	0	0	601	520	232	441	168	255	109	159	155	152	0	0	0	0	8	0	0	0	0	0	2800
d__Bacteria	k__norank	p__SR1__Absconditabacteria_	c__norank_p__SR1__Absconditabacteria_	o__norank_p__SR1__Absconditabacteria_	f__norank_p__SR1__Absconditabacteria_	g__norank_p__SR1__Absconditabacteria_	s__uncultured_rumen_bacterium_g__norank_p__SR1__Absconditabacteria_	OTU852	0	0	12	9	23	26	0	0	0	0	0	0	0	0	0	0	0	0	0	0	0	0	0	0	0	0	0	0	0	0	0	0	0	0	0	0	0	0	70
d__Bacteria	k__norank	p__Firmicutes	c__Clostridia	o__Clostridiales	f__Clostridiaceae_1	g__Clostridium_sensu_stricto_2	s__Clostridium_hydrogeniformans	OTU1306	0	0	0	1	6	0	0	2	1	2	2	0	0	0	1	0	0	0	0	0	0	0	1	0	0	0	0	0	1	1	0	1	4	0	0	0	0	0	23
d__Bacteria	k__norank	p__Parcubacteria	c__unclassified_p__Parcubacteria	o__unclassified_p__Parcubacteria	f__unclassified_p__Parcubacteria	g__unclassified_p__Parcubacteria	s__unclassified_p__Parcubacteria	OTU22	34	0	0	0	0	0	0	0	0	0	0	0	0	0	0	0	0	0	0	0	0	0	0	0	0	0	0	0	0	0	0	0	0	0	0	0	0	0	34
d__Bacteria	k__norank	p__TM6__Dependentiae_	c__norank_p__TM6__Dependentiae_	o__norank_p__TM6__Dependentiae_	f__norank_p__TM6__Dependentiae_	g__norank_p__TM6__Dependentiae_	s__candidate_division_TM6_bacterium_GW2011_GWF2_30_66	OTU1819	0	0	0	0	0	0	0	0	0	0	0	0	0	0	0	0	0	0	2	4	4	0	1	2	0	1	0	0	0	0	0	0	0	0	0	0	0	0	14
d__Bacteria	k__norank	p__Actinobacteria	c__Actinobacteria	o__Solirubrobacterales	f__unclassified_o__Solirubrobacterales	g__unclassified_o__Solirubrobacterales	s__unclassified_o__Solirubrobacterales	OTU87	8	0	0	0	0	0	0	0	0	0	0	0	0	0	0	0	0	0	0	0	0	0	0	0	0	0	0	0	0	0	0	0	0	0	0	0	0	0	8
d__Bacteria	k__norank	p__Firmicutes	c__Bacilli	o__Lactobacillales	f__Streptococcaceae	g__Streptococcus	s__Streptococcus_parauberis	OTU2039	0	0	0	0	0	2	10	6	0	13	13	0	0	0	0	0	0	0	0	0	0	0	0	0	0	0	0	0	8	15	3	8	103	0	0	0	0	0	181
d__Bacteria	k__norank	p__Proteobacteria	c__Deltaproteobacteria	o__Myxococcales	f__Archangiaceae	g__Anaeromyxobacter	s__uncultured_soil_bacterium_g__Anaeromyxobacter	OTU1889	0	0	0	0	0	0	0	0	0	0	0	0	0	0	0	0	0	0	13	11	6	26	16	10	16	13	16	5	0	0	0	0	0	0	0	0	0	0	132
d__Bacteria	k__norank	p__Chloroflexi	c__SJA-15	o__norank_c__SJA-15	f__norank_c__SJA-15	g__norank_c__SJA-15	s__uncultured_Chloroflexi_bacterium_g__norank_c__SJA-15	OTU1817	0	0	0	0	0	0	0	0	0	0	0	0	0	0	0	0	0	0	1	0	0	2	3	1	0	0	0	0	0	0	0	0	0	0	0	0	0	0	7
d__Bacteria	k__norank	p__Actinobacteria	c__Actinobacteria	o__Solirubrobacterales	f__Elev-16S-1332	g__norank_f__Elev-16S-1332	s__uncultured_Rubrobacteraceae_bacterium_g__norank_f__Elev-16S-1332	OTU128	15	4	0	0	3	0	0	0	0	0	0	0	0	0	0	0	0	0	0	0	0	0	0	0	0	0	0	0	0	0	0	0	0	0	0	0	0	0	22
d__Bacteria	k__norank	p__Proteobacteria	c__Deltaproteobacteria	o__Desulfovibrionales	f__Desulfovibrionaceae	g__Desulfovibrio	s__uncultured_rumen_bacterium_g__Desulfovibrio	OTU1108	0	10	22	26	33	38	0	0	0	0	0	0	0	0	0	0	0	0	0	0	0	0	0	0	0	0	0	0	0	0	0	0	0	0	0	0	0	0	129
d__Bacteria	k__norank	p__Actinobacteria	c__Actinobacteria	o__unclassified_c__Actinobacteria	f__unclassified_c__Actinobacteria	g__unclassified_c__Actinobacteria	s__unclassified_c__Actinobacteria	OTU257	0	22	0	0	0	0	0	0	0	0	0	0	0	0	0	0	0	0	0	0	0	0	0	0	0	0	0	0	0	0	0	0	0	0	0	0	0	0	22
d__Bacteria	k__norank	p__Actinobacteria	c__Actinobacteria	o__Corynebacteriales	f__Dietziaceae	g__Dietzia	s__unclassified_g__Dietzia	OTU2071	0	3	4	0	0	0	2	15	3	5	0	0	0	5	0	0	0	0	0	0	0	0	0	0	0	0	0	0	4	7	1	5	91	0	0	0	0	0	145
d__Bacteria	k__norank	p__Firmicutes	c__Erysipelotrichia	o__Erysipelotrichales	f__Erysipelotrichaceae	g__norank_f__Erysipelotrichaceae	s__uncultured_bacterium_g__norank_f__Erysipelotrichaceae	OTU1095	0	0	0	0	0	5	0	0	0	0	0	0	1	1	7	0	1	2	0	0	0	0	0	0	0	0	0	0	0	0	0	0	0	0	0	0	0	0	17
d__Bacteria	k__norank	p__Proteobacteria	c__Deltaproteobacteria	o__Desulfuromonadales	f__Geobacteraceae	g__Geobacter	s__unclassified_g__Geobacter	OTU1972	0	0	0	0	0	0	0	0	0	0	0	0	0	0	0	0	0	0	5	3	0	0	7	0	0	1	0	1	0	0	0	0	0	0	0	0	0	0	17
d__Bacteria	k__norank	p__Proteobacteria	c__Gammaproteobacteria	o__Enterobacteriales	f__Enterobacteriaceae	g__Proteus	s__unclassified_g__Proteus	OTU219	0	175	0	0	0	0	0	0	0	0	0	0	0	0	0	0	1	0	0	0	0	0	0	0	0	0	0	0	2	0	0	0	0	0	0	0	1	0	179
d__Bacteria	k__norank	p__Proteobacteria	c__Alphaproteobacteria	o__Rhodobacterales	f__Rhodobacteraceae	g__Cereibacter	s__uncultured_bacterium_g__Cereibacter	OTU2127	4	0	0	0	0	0	7	0	0	0	2	0	0	0	0	0	0	0	0	0	0	0	0	0	0	0	0	0	0	1	0	0	10	0	0	0	0	0	24
d__Bacteria	k__norank	p__Bacteroidetes	c__Bacteroidia	o__Bacteroidales	f__unclassified_o__Bacteroidales	g__unclassified_o__Bacteroidales	s__unclassified_o__Bacteroidales	OTU645	0	0	0	5	0	0	0	0	0	0	0	0	0	0	0	0	0	0	0	0	0	0	0	0	0	0	0	0	0	0	0	0	0	0	0	0	0	0	5
d__Bacteria	k__norank	p__Saccharibacteria	c__norank_p__Saccharibacteria	o__norank_p__Saccharibacteria	f__norank_p__Saccharibacteria	g__norank_p__Saccharibacteria	s__unclassified_g__norank_p__Saccharibacteria	OTU962	0	0	0	0	47	0	0	0	0	0	0	0	0	0	0	0	0	0	0	0	0	0	0	0	0	0	0	0	0	0	0	0	0	0	0	0	0	0	47
d__Bacteria	k__norank	p__Firmicutes	c__Clostridia	o__Clostridiales	f__Clostridiales_vadinBB60_group	g__norank_f__Clostridiales_vadinBB60_group	s__uncultured_rumen_bacterium_4C28d-15	OTU802	0	0	0	0	4	0	0	0	0	0	0	0	0	0	0	0	0	0	0	0	0	0	0	0	0	0	0	0	0	0	0	0	0	0	0	0	0	0	4
d__Bacteria	k__norank	p__Proteobacteria	c__Deltaproteobacteria	o__Myxococcales	f__mle1-27	g__norank_f__mle1-27	s__uncultured_delta_proteobacterium_g__norank_f__mle1-27	OTU609	0	0	10	0	0	0	0	0	0	0	0	0	0	0	0	0	0	0	0	0	0	0	0	0	0	0	0	0	0	0	0	0	0	0	0	0	0	0	10
d__Bacteria	k__norank	p__Bacteroidetes	c__Bacteroidia	o__Bacteroidales	f__Prevotellaceae	g__Paraprevotella	s__gut_metagenome_g__Paraprevotella	OTU418	0	0	14	0	0	0	0	0	0	0	0	0	0	0	0	0	0	0	0	0	0	0	0	0	0	0	0	0	0	0	0	0	0	0	0	0	0	0	14
d__Bacteria	k__norank	p__Acidobacteria	c__Acidobacteria	o__Holophagales	f__Holophagaceae	g__Geothrix	s__uncultured_Acidobacteria_bacterium_g__Geothrix	OTU57	28	0	0	0	0	0	0	0	0	0	0	0	0	0	0	0	0	0	0	0	0	0	0	0	0	0	0	0	0	0	0	0	0	0	0	0	0	0	28
d__Bacteria	k__norank	p__Firmicutes	c__Erysipelotrichia	o__Erysipelotrichales	f__Erysipelotrichaceae	g__[Anaerorhabdus]_furcosa_group	s__unclassified_g__[Anaerorhabdus]_furcosa_group	OTU1057	0	0	0	10	76	0	0	0	0	0	0	0	0	0	0	0	0	0	0	0	0	0	0	0	0	0	0	0	0	0	0	0	0	0	0	0	0	0	86
d__Bacteria	k__norank	p__Proteobacteria	c__Deltaproteobacteria	o__Desulfobacterales	f__Desulfobulbaceae	g__Desulfobulbus	s__unclassified_g__Desulfobulbus	OTU143	13	0	0	0	0	0	0	0	0	1	0	0	0	0	0	0	0	0	3	8	0	3	2	0	0	0	1	0	0	0	0	0	0	0	0	0	0	0	31
d__Bacteria	k__norank	p__Bacteroidetes	c__Bacteroidia	o__Bacteroidales	f__Bacteroidales_BS11_gut_group	g__norank_f__Bacteroidales_BS11_gut_group	s__unclassified_g__norank_f__Bacteroidales_BS11_gut_group	OTU1060	0	0	0	0	11	0	0	0	0	0	0	0	0	0	0	0	0	0	0	0	0	0	0	0	0	0	0	0	0	0	0	0	0	0	0	0	0	0	11
d__Bacteria	k__norank	p__Firmicutes	c__Clostridia	o__Clostridiales	f__Lachnospiraceae	g__Lachnospiraceae_AC2044_group	s__uncultured_rumen_bacterium_g__Lachnospiraceae_AC2044_group	OTU950	0	12	69	72	224	153	0	0	0	0	0	0	0	0	0	0	0	0	0	0	0	0	0	0	0	0	0	0	0	0	0	0	0	0	0	0	0	0	530
d__Bacteria	k__norank	p__Proteobacteria	c__Betaproteobacteria	o__Neisseriales	f__Neisseriaceae	g__Deefgea	s__unclassified_g__Deefgea	OTU1870	0	0	0	0	0	0	0	0	0	0	0	0	0	0	0	0	0	0	10	47	0	15	5	2913	193	43	188	1	0	0	0	0	19	0	0	0	0	0	3434
d__Bacteria	k__norank	p__Bacteroidetes	c__Bacteroidia	o__Bacteroidales	f__Bacteroidales_BS11_gut_group	g__norank_f__Bacteroidales_BS11_gut_group	s__unclassified_g__norank_f__Bacteroidales_BS11_gut_group	OTU1067	0	0	24	2	89	20	0	0	0	0	0	0	0	0	0	0	0	0	0	0	0	0	0	0	0	0	0	0	0	0	0	0	0	0	0	0	0	0	135
d__Bacteria	k__norank	p__Firmicutes	c__Clostridia	o__Clostridiales	f__Ruminococcaceae	g__[Eubacterium]_coprostanoligenes_group	s__unclassified_g__[Eubacterium]_coprostanoligenes_group	OTU355	0	0	48	4	79	9	0	0	0	0	0	0	0	0	0	0	0	0	0	0	0	0	0	0	0	0	0	0	0	0	0	0	0	0	0	0	0	0	140
d__Bacteria	k__norank	p__Cyanobacteria	c__Cyanobacteria	o__norank_c__Cyanobacteria	f__norank_c__Cyanobacteria	g__norank_c__Cyanobacteria	s__unclassified_g__norank_c__Cyanobacteria	OTU1971	0	0	0	0	0	0	0	0	0	0	0	0	0	0	0	0	0	0	2	2	3	2	0	0	1	1	0	1	0	0	0	0	0	0	0	0	0	0	12
d__Bacteria	k__norank	p__Actinobacteria	c__Actinobacteria	o__Gaiellales	f__norank_o__Gaiellales	g__norank_o__Gaiellales	s__unclassified_g__norank_o__Gaiellales	OTU1931	0	0	0	0	6	1	0	4	0	2	0	0	0	0	0	0	0	0	65	62	162	64	87	33	8	35	18	30	2	3	0	0	31	0	0	0	0	0	613
d__Bacteria	k__norank	p__Chloroflexi	c__SBR2076	o__norank_c__SBR2076	f__norank_c__SBR2076	g__norank_c__SBR2076	s__unclassified_g__norank_c__SBR2076	OTU1597	0	0	0	0	0	0	0	0	0	0	0	0	0	0	0	0	0	0	10	13	30	2	7	4	1	3	0	0	0	1	0	0	1	0	0	0	0	0	72
d__Bacteria	k__norank	p__Chloroflexi	c__SJA-15	o__norank_c__SJA-15	f__norank_c__SJA-15	g__norank_c__SJA-15	s__unclassified_g__norank_c__SJA-15	OTU2119	0	0	0	0	0	0	0	4	0	0	0	0	0	0	0	0	0	0	4	3	3	2	1	1	0	0	1	1	0	0	0	1	5	0	0	0	0	0	26
d__Bacteria	k__norank	p__Fusobacteria	c__Fusobacteriia	o__Fusobacteriales	f__Fusobacteriaceae	g__Fusobacterium	s__unclassified_g__Fusobacterium	OTU368	0	0	7	0	0	0	0	0	0	0	0	0	0	0	0	0	0	0	0	0	1	0	0	0	0	0	0	0	0	0	0	0	0	0	0	0	4	0	12
d__Bacteria	k__norank	p__Bacteroidetes	c__Bacteroidia	o__Bacteroidales	f__Prevotellaceae	g__Prevotellaceae_UCG-001	s__unclassified_g__Prevotellaceae_UCG-001	OTU991	0	4	18	80	50	23	0	0	0	0	0	0	0	0	0	0	0	0	0	0	0	0	0	0	0	0	0	0	0	0	0	0	0	0	0	0	0	0	175
d__Bacteria	k__norank	p__Firmicutes	c__Clostridia	o__Clostridiales	f__Ruminococcaceae	g__Ruminiclostridium_1	s__uncultured_bacterium_g__Ruminiclostridium_1	OTU977	0	6	20	15	26	12	0	0	0	0	0	0	0	0	0	0	0	0	0	0	0	0	0	0	0	0	0	0	0	0	0	0	0	0	0	0	0	0	79
d__Bacteria	k__norank	p__TM6__Dependentiae_	c__norank_p__TM6__Dependentiae_	o__norank_p__TM6__Dependentiae_	f__norank_p__TM6__Dependentiae_	g__norank_p__TM6__Dependentiae_	s__unclassified_g__norank_p__TM6__Dependentiae_	OTU1907	0	0	0	0	0	0	0	0	0	0	0	0	0	0	0	0	0	0	0	0	3	0	0	0	1	0	0	0	0	0	0	0	0	0	0	0	0	0	4
d__Bacteria	k__norank	p__Actinobacteria	c__Actinobacteria	o__Corynebacteriales	f__Corynebacteriaceae	g__Corynebacterium_1	s__Corynebacterium_maris_DSM_45190	OTU1342	0	0	0	0	0	0	0	14	3	0	1	4	0	0	0	0	0	0	0	0	0	0	0	0	0	0	0	0	0	0	0	0	0	0	0	0	0	0	22
d__Bacteria	k__norank	p__Synergistetes	c__Synergistia	o__Synergistales	f__Synergistaceae	g__Synergistes	s__Synergistes_jonesii	OTU1192	0	0	0	0	0	6	0	0	0	0	0	0	0	0	0	0	0	0	0	0	0	0	0	0	0	0	0	0	0	0	0	0	0	0	0	0	0	0	6
d__Bacteria	k__norank	p__Proteobacteria	c__Alphaproteobacteria	o__Rhizobiales	f__unclassified_o__Rhizobiales	g__unclassified_o__Rhizobiales	s__unclassified_o__Rhizobiales	OTU1413	0	0	0	0	0	0	0	7	0	0	0	0	0	1	0	0	0	0	0	0	0	0	0	0	0	0	0	0	0	0	0	0	0	0	0	0	0	0	8
d__Bacteria	k__norank	p__Firmicutes	c__Clostridia	o__Clostridiales	f__Family_XIII	g__Anaerovorax	s__uncultured_rumen_bacterium_g__Anaerovorax	OTU189	0	6	0	0	0	0	0	0	0	0	0	0	0	0	0	0	0	0	0	0	0	0	0	0	0	0	0	0	0	0	0	0	0	0	0	0	0	0	6
d__Bacteria	k__norank	p__Lentisphaerae	c__Oligosphaeria	o__Oligosphaerales	f__Oligosphaeraceae	g__horsej-a03	s__uncultured_rumen_bacterium_g__horsej-a03	OTU1014	0	0	0	0	9	0	0	0	0	0	0	0	0	0	0	0	0	0	0	0	0	0	0	0	0	0	0	0	0	0	0	0	0	0	0	0	0	0	9
d__Bacteria	k__norank	p__Bacteroidetes	c__Bacteroidia	o__Bacteroidales	f__Rikenellaceae	g__SP3-e08	s__uncultured_bacterium_g__SP3-e08	OTU653	0	0	1	32	77	16	0	0	0	0	0	0	0	0	0	0	0	0	0	0	0	0	0	0	0	0	0	0	0	0	0	0	0	0	0	0	0	0	126
d__Bacteria	k__norank	p__Bacteroidetes	c__Bacteroidia	o__Bacteroidales	f__M2PB4-65_termite_group	g__norank_f__M2PB4-65_termite_group	s__unclassified_g__norank_f__M2PB4-65_termite_group	OTU668	0	0	6	23	28	1	0	0	0	0	0	0	0	0	0	0	0	0	0	0	0	0	0	0	0	0	0	0	0	0	0	0	0	0	0	0	0	0	58
d__Bacteria	k__norank	p__Proteobacteria	c__Gammaproteobacteria	o__Xanthomonadales	f__Xanthomonadales_Incertae_Sedis	g__Acidibacter	s__unclassified_g__Acidibacter	OTU265	0	8	0	0	0	0	0	0	0	0	0	0	0	0	0	0	0	0	0	0	0	0	0	0	0	0	0	0	0	0	0	0	0	0	0	0	0	0	8
d__Bacteria	k__norank	p__Chlorobi	c__Chlorobia	o__Chlorobiales	f__SJA-28	g__norank_f__SJA-28	s__Chlorobi_bacterium_OLB4	OTU89	12	0	0	0	0	0	0	0	0	0	0	0	0	0	0	0	0	0	0	0	0	0	0	0	0	0	0	1	0	0	0	0	0	0	0	0	0	0	13
d__Bacteria	k__norank	p__Bacteroidetes	c__Flavobacteriia	o__Flavobacteriales	f__Flavobacteriaceae	g__Flavobacterium	s__unclassified_g__Flavobacterium	OTU1954	0	0	0	0	0	0	0	0	0	0	0	0	0	0	0	0	0	0	74	1400	71	1472	438	170	2985	1614	1956	185	1	0	0	0	0	0	0	0	0	0	10366
d__Bacteria	k__norank	p__Proteobacteria	c__Gammaproteobacteria	o__Oceanospirillales	f__Oceanospirillaceae	g__Marinobacterium	s__uncultured_Marinobacterium_sp._g__Marinobacterium	OTU1293	0	0	0	0	0	0	4	0	0	0	0	0	0	0	0	0	0	0	0	0	0	0	0	0	0	0	0	0	0	0	0	0	0	0	0	0	0	0	4
d__Bacteria	k__norank	p__Cyanobacteria	c__Cyanobacteria	o__SubsectionI	f__FamilyI_o__SubsectionI	g__Merismopedia	s__unclassified_g__Merismopedia	OTU1893	0	0	0	0	0	0	0	0	0	0	0	0	0	0	0	0	0	0	2	0	0	1	0	1	1	0	0	0	0	0	0	0	0	0	0	0	0	0	5
d__Bacteria	k__norank	p__Bacteroidetes	c__Cytophagia	o__Cytophagales	f__Cytophagaceae	g__norank_f__Cytophagaceae	s__uncultured_bacterium_g__norank_f__Cytophagaceae	OTU579	0	0	17	0	0	0	0	0	0	0	0	0	0	0	0	0	0	0	0	0	0	0	0	0	0	0	0	0	0	0	0	0	0	0	0	0	0	0	17
d__Bacteria	k__norank	p__Verrucomicrobia	c__Spartobacteria	o__Chthoniobacterales	f__Chthoniobacterales_Incertae_Sedis	g__Terrimicrobium	s__uncultured_bacterium_g__Terrimicrobium	OTU1651	0	0	0	0	0	0	1	0	0	0	0	0	0	0	0	0	0	0	1	0	5	0	1	1	0	0	0	0	0	0	0	0	0	0	0	0	0	0	9
d__Bacteria	k__norank	p__Chloroflexi	c__SJA-15	o__norank_c__SJA-15	f__norank_c__SJA-15	g__norank_c__SJA-15	s__uncultured_bacterium_g__norank_c__SJA-15	OTU1599	0	0	0	0	0	1	0	7	0	0	0	0	0	0	0	0	0	0	23	38	42	26	21	10	2	8	8	12	3	3	0	1	24	0	0	0	0	0	229
d__Bacteria	k__norank	p__Actinobacteria	c__Actinobacteria	o__Acidimicrobiales	f__norank_o__Acidimicrobiales	g__norank_o__Acidimicrobiales	s__wastewater_metagenome_g__norank	OTU1832	0	0	0	0	0	0	0	3	0	0	0	0	0	0	0	0	0	0	3	2	0	0	4	0	0	0	0	1	0	0	0	0	0	0	0	0	0	0	13
d__Bacteria	k__norank	p__Firmicutes	c__Clostridia	o__Clostridiales	f__Christensenellaceae	g__Christensenellaceae_R-7_group	s__uncultured_bacterium_g__Christensenellaceae_R-7_group	OTU1020	0	0	0	0	16	6	0	0	0	0	1	0	0	0	0	0	0	0	0	0	0	0	0	0	0	0	0	0	0	0	0	0	0	0	0	0	0	0	23
d__Bacteria	k__norank	p__Firmicutes	c__Clostridia	o__Clostridiales	f__Family_XIII	g__[Eubacterium]_nodatum_group	s__unclassified_g__[Eubacterium]_nodatum_group	OTU221	0	9	0	1	0	0	0	0	0	0	0	0	0	0	0	0	0	0	0	0	0	0	0	0	0	0	0	0	0	0	0	0	0	0	0	0	0	0	10
d__Bacteria	k__norank	p__Cyanobacteria	c__Cyanobacteria	o__norank_c__Cyanobacteria	f__norank_c__Cyanobacteria	g__norank_c__Cyanobacteria	s__unclassified_g__norank_c__Cyanobacteria	OTU1990	0	0	0	0	0	0	0	0	0	0	0	0	0	0	0	0	0	0	32	38	18	12	16	13	4	6	3	7	0	0	0	0	0	0	0	0	0	0	149
d__Bacteria	k__norank	p__Cyanobacteria	c__Cyanobacteria	o__norank_c__Cyanobacteria	f__norank_c__Cyanobacteria	g__norank_c__Cyanobacteria	s__unclassified_g__norank_c__Cyanobacteria	OTU1992	0	0	0	0	0	0	0	1	0	0	3	0	0	0	0	0	0	0	23	16	26	9	20	17	1	11	1	12	0	0	0	0	2	0	0	0	0	0	142
d__Bacteria	k__norank	p__Chloroflexi	c__KD4-96	o__norank_c__KD4-96	f__norank_c__KD4-96	g__norank_c__KD4-96	s__unclassified_g__norank_c__KD4-96	OTU1872	0	0	0	0	0	0	0	0	0	0	0	0	0	0	0	0	0	0	17	25	20	5	8	2	8	5	0	3	1	0	0	0	0	0	0	0	0	0	94
d__Bacteria	k__norank	p__Cyanobacteria	c__Cyanobacteria	o__norank_c__Cyanobacteria	f__norank_c__Cyanobacteria	g__norank_c__Cyanobacteria	s__unclassified_g__norank_c__Cyanobacteria	OTU1997	0	0	0	0	0	0	0	0	0	0	0	0	0	0	0	0	0	0	9	5	14	2	0	2	1	1	0	2	0	0	0	0	0	0	0	0	0	0	36
d__Bacteria	k__norank	p__Cyanobacteria	c__Cyanobacteria	o__norank_c__Cyanobacteria	f__norank_c__Cyanobacteria	g__norank_c__Cyanobacteria	s__unclassified_g__norank_c__Cyanobacteria	OTU1996	0	0	0	0	0	0	0	0	0	0	0	0	0	0	0	0	0	0	3	1	1	0	0	2	0	1	0	1	0	0	0	0	0	0	0	0	0	0	9
d__Bacteria	k__norank	p__Bacteroidetes	c__Bacteroidia	o__Bacteroidales	f__Rikenellaceae	g__SP3-e08	s__uncultured_bacterium_g__SP3-e08	OTU878	0	0	0	0	15	0	0	0	0	0	0	0	0	0	0	0	0	0	0	0	0	0	0	0	0	0	0	0	0	0	0	0	0	0	0	0	0	0	15
d__Bacteria	k__norank	p__Actinobacteria	c__Actinobacteria	o__Corynebacteriales	f__Mycobacteriaceae	g__Mycobacterium	s__unclassified_g__Mycobacterium	OTU127	21	0	0	0	0	0	0	0	0	0	0	0	0	0	0	0	0	0	0	0	5	0	0	0	0	0	0	0	0	2	0	2	13	0	0	0	0	0	43
d__Bacteria	k__norank	p__Actinobacteria	c__Actinobacteria	o__Propionibacteriales	f__Nocardioidaceae	g__Nocardioides	s__Nocardioides_sp._RW28	OTU14	14	0	0	0	0	0	0	0	0	0	0	0	0	0	0	0	0	0	0	0	0	0	0	0	0	0	0	0	0	0	0	0	0	0	0	0	0	0	14
d__Bacteria	k__norank	p__Bacteroidetes	c__Cytophagia	o__Cytophagales	f__Cytophagaceae	g__Hymenobacter	s__uncultured_bacterium_g__Hymenobacter	OTU1290	0	0	0	0	0	0	13	0	0	0	0	0	0	0	0	0	0	0	0	0	0	0	0	0	0	0	0	0	0	0	0	0	0	0	0	0	0	0	13
d__Bacteria	k__norank	p__Bacteroidetes	c__Bacteroidia	o__Bacteroidales	f__Rikenellaceae	g__Rikenellaceae_RC9_gut_group	s__Eubacterium_sp._F1	OTU1184	0	0	48	92	220	120	0	2	0	0	0	0	0	0	0	0	0	0	0	0	0	0	0	0	0	0	0	0	0	0	0	0	0	0	0	0	0	0	482
d__Bacteria	k__norank	p__Proteobacteria	c__Gammaproteobacteria	o__Methylococcales	f__Methylococcaceae	g__Methylomonas	s__unclassified_g__Methylomonas	OTU11	26	0	0	0	0	0	0	0	0	0	0	0	0	0	0	0	0	0	0	0	0	0	0	0	0	0	0	0	0	0	0	0	0	0	0	0	0	0	26
d__Bacteria	k__norank	p__Bacteroidetes	c__Bacteroidia	o__Bacteroidales	f__Rikenellaceae	g__Rikenellaceae_RC9_gut_group	s__uncultured_bacterium_g__Rikenellaceae_RC9_gut_group	OTU656	0	0	19	16	43	29	0	0	0	0	0	0	0	0	0	0	0	0	0	0	0	0	0	0	0	0	0	0	0	0	0	0	0	0	0	0	0	0	107
d__Bacteria	k__norank	p__Deinococcus-Thermus	c__Deinococci	o__KD3-62	f__norank_o__KD3-62	g__norank_o__KD3-62	s__uncultured_organism_g__norank_o__KD3-62	OTU1436	0	0	0	0	0	0	0	0	0	0	0	0	0	0	0	0	0	0	1	3	6	1	0	0	0	0	0	0	0	0	0	0	0	0	0	0	0	0	11
d__Bacteria	k__norank	p__Firmicutes	c__Erysipelotrichia	o__Erysipelotrichales	f__Erysipelotrichaceae	g__norank_f__Erysipelotrichaceae	s__Firmicutes_bacterium_ZOR0006	OTU1717	0	0	0	0	0	0	0	0	0	0	0	0	0	0	0	0	0	0	11	23	4	60	14	16	93	62	129	1	0	0	0	0	0	0	1	0	0	1	415
d__Bacteria	k__norank	p__Proteobacteria	c__Alphaproteobacteria	o__Rhizobiales	f__Xanthobacteraceae	g__norank_f__Xanthobacteraceae	s__unclassified_g__norank_f__Xanthobacteraceae	OTU9	9	6	0	2	0	2	0	0	0	0	0	0	0	0	0	0	0	0	0	0	2	3	1	1	1	1	1	0	0	0	0	0	2	0	0	0	0	0	31
d__Bacteria	k__norank	p__Bacteroidetes	c__Bacteroidia	o__Bacteroidales	f__Prevotellaceae	g__Prevotella_1	s__unclassified_g__Prevotella_1	OTU1179	0	39	62	75	135	52	0	0	0	0	0	0	0	0	0	0	0	0	0	0	0	0	0	0	0	0	0	0	0	0	0	0	0	0	0	0	0	0	363
d__Bacteria	k__norank	p__Proteobacteria	c__Gammaproteobacteria	o__Xanthomonadales	f__Xanthomonadaceae	g__Ignatzschineria	s__unclassified_g__Ignatzschineria	OTU1542	0	0	0	0	0	0	0	0	0	0	0	0	0	0	0	0	0	0	2	51	5	25	8	0	7	0	8	0	0	0	0	0	0	0	0	0	0	0	106
d__Bacteria	k__norank	p__Bacteroidetes	c__Bacteroidia	o__Bacteroidales	f__unclassified_o__Bacteroidales	g__unclassified_o__Bacteroidales	s__unclassified_o__Bacteroidales	OTU254	0	4	21	4	185	22	0	0	0	0	0	0	0	0	0	0	0	0	0	0	0	0	0	0	0	0	0	0	0	0	0	0	0	0	0	0	0	0	236
d__Bacteria	k__norank	p__Actinobacteria	c__Actinobacteria	o__Corynebacteriales	f__Corynebacteriaceae	g__Corynebacterium_1	s__Corynebacterium_riegelii	OTU249	0	6	0	0	0	0	0	0	0	0	0	0	0	0	0	0	0	0	0	0	0	0	0	0	0	0	0	0	0	0	0	0	0	0	0	0	0	0	6
d__Bacteria	k__norank	p__Lentisphaerae	c__Oligosphaeria	o__Oligosphaerales	f__Oligosphaeraceae	g__horsej-a03	s__uncultured_rumen_bacterium_g__horsej-a03	OTU873	0	0	0	0	44	2	0	0	0	0	0	0	0	0	0	0	0	0	0	0	0	0	0	0	0	0	0	0	0	0	0	0	0	0	0	0	0	0	46
d__Bacteria	k__norank	p__Proteobacteria	c__Alphaproteobacteria	o__Rhodobacterales	f__Rhodobacteraceae	g__Thioclava	s__uncultured_bacterium_g__Thioclava	OTU1630	0	0	0	0	0	0	0	0	0	0	0	0	0	0	0	0	0	0	1	1	6	3	6	2	0	2	0	0	0	0	0	0	1	0	0	0	0	0	22
d__Bacteria	k__norank	p__Proteobacteria	c__Deltaproteobacteria	o__Syntrophobacterales	f__Syntrophobacteraceae	g__norank_f__Syntrophobacteraceae	s__uncultured_proteobacterium_g__norank_f__Syntrophobacteraceae	OTU1773	0	0	0	0	0	0	0	0	0	0	0	0	0	1	0	0	0	0	5	8	6	1	3	0	0	0	0	0	0	0	0	0	0	0	0	0	0	0	24
d__Bacteria	k__norank	p__Cyanobacteria	c__Cyanobacteria	o__norank_c__Cyanobacteria	f__norank_c__Cyanobacteria	g__norank_c__Cyanobacteria	s__unclassified_g__norank_c__Cyanobacteria	OTU1571	0	0	0	0	0	0	0	0	0	1	0	0	0	0	0	0	0	0	8	12	22	4	6	5	2	1	1	5	0	1	0	0	1	0	0	0	0	0	69
d__Bacteria	k__norank	p__Firmicutes	c__Clostridia	o__Clostridiales	f__Ruminococcaceae	g__norank_f__Ruminococcaceae	s__unclassified_g__norank_f__Ruminococcaceae	OTU730	0	0	0	9	0	0	0	1	0	0	0	0	0	0	0	0	0	0	0	0	0	0	0	0	0	0	0	0	0	0	0	0	0	0	0	0	0	0	10
d__Bacteria	k__norank	p__Proteobacteria	c__Gammaproteobacteria	o__Xanthomonadales	f__Xanthomonadales_Incertae_Sedis	g__norank_f__Xanthomonadales_Incertae_Sedis	s__unclassified_g__norank_f__Xanthomonadales_Incertae_Sedis	OTU1728	10	0	8	0	0	0	0	0	1	0	0	0	1	1	0	0	0	0	260	488	69	308	152	67	56	14	77	101	12	2	0	0	4	0	0	0	0	0	1631
d__Bacteria	k__norank	p__Proteobacteria	c__Alphaproteobacteria	o__Caulobacterales	f__Caulobacteraceae	g__norank_f__Caulobacteraceae	s__uncultured_alpha_proteobacterium_g__norank_f__Caulobacteraceae	OTU1257	0	0	0	0	4	0	4	0	0	1	0	0	0	0	0	0	0	0	0	0	2	0	0	0	0	0	0	0	0	0	0	0	0	0	0	0	0	0	11
d__Bacteria	k__norank	p__Nitrospirae	c__Nitrospira	o__norank_c__Nitrospira	f__norank_c__Nitrospira	g__Nitrospira	s__unclassified_g__Nitrospira	OTU1854	0	0	0	0	0	0	0	0	0	0	0	0	0	0	0	0	0	0	0	2	0	3	9	2	2	0	1	0	0	0	0	0	1	0	0	0	0	0	20
d__Bacteria	k__norank	p__Firmicutes	c__Erysipelotrichia	o__Erysipelotrichales	f__Erysipelotrichaceae	g__Erysipelotrichaceae_UCG-004	s__unclassified_g__Erysipelotrichaceae_UCG-004	OTU787	0	0	0	0	32	0	0	0	0	0	0	0	0	0	0	0	0	0	0	0	0	0	0	0	0	0	0	0	0	0	0	0	0	0	0	0	0	0	32
d__Bacteria	k__norank	p__Firmicutes	c__Clostridia	o__Clostridiales	f__Lachnospiraceae	g__norank_f__Lachnospiraceae	s__uncultured_rumen_bacterium_g__norank_f__Lachnospiraceae	OTU919	0	0	0	0	33	0	0	0	0	0	0	0	0	0	0	0	0	0	0	0	0	0	0	0	0	0	0	0	0	0	0	0	0	0	0	0	0	0	33
d__Bacteria	k__norank	p__Firmicutes	c__Clostridia	o__Clostridiales	f__Christensenellaceae	g__Christensenellaceae_R-7_group	s__unclassified_g__Christensenellaceae_R-7_group	OTU439	0	0	8	0	19	15	0	1	0	0	0	0	0	0	0	0	0	0	0	0	0	0	0	0	0	0	0	0	0	0	0	0	0	0	0	0	0	0	43
d__Bacteria	k__norank	p__Actinobacteria	c__Actinobacteria	o__Pseudonocardiales	f__Pseudonocardiaceae	g__Pseudonocardia	s__unclassified_g__Pseudonocardia	OTU1375	5	1	0	0	0	0	9	2	0	1	4	0	0	0	0	0	0	0	0	0	0	0	0	0	0	0	0	0	0	0	0	0	1	0	0	0	0	0	23
d__Bacteria	k__norank	p__Verrucomicrobia	c__Verrucomicrobiae	o__Verrucomicrobiales	f__Verrucomicrobiaceae	g__norank_f__Verrucomicrobiaceae	s__unclassified_g__norank_f__Verrucomicrobiaceae	OTU1741	0	0	0	0	0	0	7	0	0	0	0	0	0	0	0	0	0	0	10	15	5	4	0	2	0	1	0	4	0	0	0	0	0	0	0	0	0	0	48
d__Bacteria	k__norank	p__TM6__Dependentiae_	c__norank_p__TM6__Dependentiae_	o__norank_p__TM6__Dependentiae_	f__norank_p__TM6__Dependentiae_	g__norank_p__TM6__Dependentiae_	s__uncultured_bacterium_g__norank_p__TM6__Dependentiae_	OTU1558	0	0	0	0	0	0	0	0	0	0	0	0	0	0	0	0	0	0	1	1	0	0	0	0	0	0	0	0	0	0	0	0	0	0	0	0	0	0	2
d__Bacteria	k__norank	p__Bacteroidetes	c__Bacteroidia	o__Bacteroidales	f__Rikenellaceae	g__Rikenellaceae_RC9_gut_group	s__unclassified_g__Rikenellaceae_RC9_gut_group	OTU664	0	0	10	27	31	19	0	0	0	0	0	0	0	0	0	0	0	0	0	0	0	0	0	0	0	0	0	0	0	0	0	0	0	0	0	0	0	0	87
d__Bacteria	k__norank	p__Bacteroidetes	c__Bacteroidia	o__Bacteroidales	f__Porphyromonadaceae	g__norank_f__Porphyromonadaceae	s__uncultured_rumen_bacterium_g__norank_f__Porphyromonadaceae	OTU886	0	0	4	0	10	5	0	0	0	0	0	0	0	0	0	0	0	0	0	0	0	0	0	0	0	0	0	0	0	0	0	0	0	0	0	0	0	0	19
d__Bacteria	k__norank	p__Bacteroidetes	c__Flavobacteriia	o__Flavobacteriales	f__Flavobacteriaceae	g__Flavobacterium	s__Flavobacterium_sp._CSF321-10	OTU111	20	0	0	4	0	0	0	0	0	0	0	0	0	0	0	0	0	0	0	0	0	0	0	0	0	0	0	0	0	0	0	0	0	0	0	0	0	0	24
d__Bacteria	k__norank	p__Cyanobacteria	c__Cyanobacteria	o__norank_c__Cyanobacteria	f__norank_c__Cyanobacteria	g__norank_c__Cyanobacteria	s__Oedogonium_cardiacum	OTU1613	0	0	0	0	0	0	0	0	0	0	0	0	0	0	0	0	0	0	5	19	31	0	0	1	0	0	0	0	0	0	0	0	0	0	0	0	0	0	56
d__Bacteria	k__norank	p__Chlorobi	c__Chlorobia	o__Chlorobiales	f__OPB56	g__norank_f__OPB56	s__uncultured_bacterium_g__norank_f__OPB56	OTU207	0	28	0	0	0	0	0	0	0	0	0	0	0	0	0	0	0	0	0	0	0	0	0	0	0	0	0	0	0	0	0	0	0	0	0	0	0	0	28
d__Bacteria	k__norank	p__TM6__Dependentiae_	c__norank_p__TM6__Dependentiae_	o__norank_p__TM6__Dependentiae_	f__norank_p__TM6__Dependentiae_	g__norank_p__TM6__Dependentiae_	s__uncultured_bacterium_g__norank_p__TM6__Dependentiae_	OTU1830	0	0	0	0	0	0	0	0	0	0	0	0	0	0	0	0	0	0	0	0	0	1	6	2	0	1	1	0	0	0	0	0	0	0	0	0	0	0	11
d__Bacteria	k__norank	p__Gemmatimonadetes	c__Gemmatimonadetes	o__norank_c__Gemmatimonadetes	f__norank_c__Gemmatimonadetes	g__norank_c__Gemmatimonadetes	s__unclassified_g__norank_c__Gemmatimonadetes	OTU10	21	0	0	0	0	0	0	0	0	0	0	0	0	0	0	0	0	0	0	0	0	0	0	0	0	0	0	0	0	0	0	0	0	0	0	0	0	0	21
d__Bacteria	k__norank	p__Firmicutes	c__Negativicutes	o__Selenomonadales	f__Veillonellaceae	g__Dialister	s__Dialister_succinatiphilus	OTU1401	0	0	0	0	0	0	0	0	0	0	0	3	0	0	0	0	0	0	0	0	0	0	0	0	0	0	0	0	0	0	0	0	0	0	0	0	0	0	3
d__Bacteria	k__norank	p__Firmicutes	c__Clostridia	o__Clostridiales	f__Lachnospiraceae	g__Lachnospiraceae_NK4A136_group	s__uncultured_rumen_bacterium_g__Lachnospiraceae_NK4A136_group	OTU943	0	31	94	107	327	86	0	0	0	0	0	0	0	0	0	0	0	0	0	0	0	0	0	0	0	0	0	0	0	0	0	0	0	0	0	0	0	0	645
d__Bacteria	k__norank	p__Proteobacteria	c__Betaproteobacteria	o__Burkholderiales	f__Comamonadaceae	g__unclassified_f__Comamonadaceae	s__unclassified_f__Comamonadaceae	OTU1727	0	0	0	0	0	0	0	0	0	0	0	0	0	0	0	0	0	0	6	2	1	9	2	2	2	1	2	2	0	0	0	0	0	0	0	0	0	0	29
d__Bacteria	k__norank	p__Latescibacteria	c__norank_p__Latescibacteria	o__norank_p__Latescibacteria	f__norank_p__Latescibacteria	g__norank_p__Latescibacteria	s__uncultured_soil_bacterium_g__norank_p__Latescibacteria	OTU326	0	0	5	0	0	0	0	0	0	0	0	0	0	0	0	0	0	0	0	0	0	0	0	0	0	0	0	0	0	0	0	0	0	0	0	0	0	0	5
d__Bacteria	k__norank	p__Bacteroidetes	c__Bacteroidia	o__Bacteroidales	f__Rikenellaceae	g__Alistipes	s__unclassified_g__Alistipes	OTU1219	0	0	0	0	0	8	0	0	0	0	0	0	0	0	0	0	0	0	0	0	0	0	0	0	0	0	0	0	0	0	0	0	0	0	0	0	2	0	10
d__Bacteria	k__norank	p__Proteobacteria	c__Deltaproteobacteria	o__Sva0485	f__norank_o__Sva0485	g__norank_o__Sva0485	s__uncultured_delta_proteobacterium_g__norank_o__Sva0485	OTU1468	0	0	0	0	0	0	0	0	0	0	0	0	0	0	0	0	0	0	2	1	0	1	3	0	0	1	0	0	0	0	0	0	0	0	0	0	0	0	8
d__Bacteria	k__norank	p__Bacteroidetes	c__Bacteroidia	o__Bacteroidales	f__Prevotellaceae	g__Prevotella_2	s__unclassified_g__Prevotella_2	OTU241	0	7	0	0	0	0	0	0	0	0	0	0	0	0	0	0	0	0	0	0	0	0	0	0	0	0	0	0	0	0	0	0	0	0	0	0	0	0	7
d__Bacteria	k__norank	p__Proteobacteria	c__Alphaproteobacteria	o__Rhizobiales	f__unclassified_o__Rhizobiales	g__unclassified_o__Rhizobiales	s__unclassified_o__Rhizobiales	OTU2019	5	1	0	0	4	5	2	20	7	0	0	0	5	64	3	0	0	0	0	0	0	0	5	0	0	0	0	0	4	13	0	2	28	0	0	0	0	0	168
d__Bacteria	k__norank	p__Verrucomicrobia	c__Verrucomicrobiae	o__Verrucomicrobiales	f__Verrucomicrobiaceae	g__Verrucomicrobium	s__uncultured_bacterium_g__Verrucomicrobium	OTU1548	0	0	0	0	0	0	0	4	0	0	0	0	0	0	0	0	0	0	13	16	0	2	1	5	0	2	0	2	0	0	0	0	0	0	0	0	0	0	45
d__Bacteria	k__norank	p__Bacteroidetes	c__Bacteroidia	o__Bacteroidales	f__unclassified_o__Bacteroidales	g__unclassified_o__Bacteroidales	s__unclassified_o__Bacteroidales	OTU654	0	46	24	70	72	30	0	0	0	0	0	0	0	0	0	0	0	0	0	0	0	0	0	0	0	0	0	0	0	0	0	0	0	0	0	0	0	0	242
d__Bacteria	k__norank	p__Firmicutes	c__Clostridia	o__Clostridiales	f__Clostridiaceae_1	g__Clostridium_sensu_stricto_13	s__unclassified_g__Clostridium_sensu_stricto_13	OTU1785	0	0	0	0	0	1	2	0	0	1	0	0	0	0	0	0	0	0	2	2	1	1	3	0	1	1	1	0	0	0	0	0	0	0	0	0	0	0	16
d__Bacteria	k__norank	p__Chloroflexi	c__SBR2076	o__norank_c__SBR2076	f__norank_c__SBR2076	g__norank_c__SBR2076	s__uncultured_soil_bacterium_g__norank_c__SBR2076	OTU1618	0	0	0	0	0	0	0	0	0	0	0	0	0	0	0	0	0	0	1	2	6	0	0	1	0	0	0	0	0	0	0	0	1	0	0	0	0	0	11
d__Bacteria	k__norank	p__Cyanobacteria	c__Cyanobacteria	o__SubsectionIII	f__FamilyI_o__SubsectionIII	g__unclassified_f__FamilyI_o__SubsectionIII	s__unclassified_f__FamilyI_o__SubsectionIII	OTU1441	0	0	0	0	0	0	0	0	0	0	0	0	0	0	0	0	0	0	43	281	82	6	17	1	3	1	0	7	0	0	0	0	0	0	0	0	0	0	441
d__Bacteria	k__norank	p__Proteobacteria	c__Alphaproteobacteria	o__Rickettsiales	f__Rickettsiaceae	g__norank_f__Rickettsiaceae	s__unclassified_g__norank_f__Rickettsiaceae	OTU1574	0	0	0	0	0	0	0	0	0	0	0	0	0	0	0	0	0	0	0	0	8	0	0	0	0	0	0	0	0	0	0	0	0	0	0	0	0	0	8
d__Bacteria	k__norank	p__Bacteroidetes	c__Bacteroidia	o__Bacteroidales	f__Bacteroidales_BS11_gut_group	g__norank_f__Bacteroidales_BS11_gut_group	s__uncultured_rumen_bacterium_g__norank_f__Bacteroidales_BS11_gut_group	OTU882	0	0	0	0	6	0	0	0	0	0	0	0	0	0	0	0	0	0	0	0	0	0	0	0	0	0	0	0	0	0	0	0	0	0	0	0	0	0	6
d__Bacteria	k__norank	p__Bacteroidetes	c__Bacteroidia	o__Bacteroidales	f__Rikenellaceae	g__vadinBC27_wastewater-sludge_group	s__unclassified_g__vadinBC27_wastewater-sludge_group	OTU441	0	0	4	0	0	0	0	0	0	0	0	0	0	0	0	0	0	0	0	0	0	0	0	0	0	0	0	0	0	0	0	0	0	0	0	0	0	0	4
d__Bacteria	k__norank	p__Actinobacteria	c__Actinobacteria	o__Corynebacteriales	f__Mycobacteriaceae	g__Mycobacterium	s__unclassified_g__Mycobacterium	OTU1612	1	0	0	0	0	3	0	5	0	0	2	0	0	1	0	0	0	0	12	5	20	6	9	3	6	0	2	1	2	2	0	1	16	0	0	0	0	0	97
d__Bacteria	k__norank	p__Firmicutes	c__Clostridia	o__Clostridiales	f__Family_XIII	g__unclassified_f__Family_XIII	s__unclassified_f__Family_XIII	OTU1155	0	0	0	0	0	33	0	0	0	0	0	0	0	0	0	0	0	0	0	0	0	0	0	0	0	0	0	0	0	0	0	0	0	0	0	0	0	0	33
d__Bacteria	k__norank	p__Bacteroidetes	c__Sphingobacteriia	o__Sphingobacteriales	f__FFCH9454	g__norank_f__FFCH9454	s__uncultured_bacterium_g__norank_f__FFCH9454	OTU603	0	0	11	0	0	0	0	0	0	0	0	0	0	0	0	0	0	0	0	0	0	0	0	0	0	0	0	0	0	0	0	0	0	0	0	0	0	0	11
d__Bacteria	k__norank	p__SR1__Absconditabacteria_	c__norank_p__SR1__Absconditabacteria_	o__norank_p__SR1__Absconditabacteria_	f__norank_p__SR1__Absconditabacteria_	g__norank_p__SR1__Absconditabacteria_	s__unclassified_g__norank_p__SR1__Absconditabacteria_	OTU98	19	0	0	0	0	0	0	0	0	0	0	0	0	0	0	0	0	0	0	0	0	0	0	0	0	0	0	0	0	0	0	0	0	0	0	0	0	0	19
d__Bacteria	k__norank	p__Firmicutes	c__Clostridia	o__Clostridiales	f__P._palm_C-A_51	g__norank_f__P._palm_C-A_51	s__uncultured_bacterium_g__norank_f__P._palm_C-A_51	OTU261	0	12	0	11	30	21	0	0	0	0	0	0	0	0	0	0	0	0	0	0	0	0	0	0	0	0	0	0	0	0	0	0	0	0	0	0	0	0	74
d__Bacteria	k__norank	p__Firmicutes	c__Clostridia	o__Clostridiales	f__unclassified_o__Clostridiales	g__unclassified_o__Clostridiales	s__unclassified_o__Clostridiales	OTU570	0	0	5	0	0	0	0	0	0	0	0	0	0	0	0	0	0	0	0	0	0	0	0	0	0	0	0	0	0	0	0	0	0	0	0	0	0	0	5
d__Bacteria	k__norank	p__Firmicutes	c__Clostridia	o__Clostridiales	f__Lachnospiraceae	g__unclassified_f__Lachnospiraceae	s__unclassified_f__Lachnospiraceae	OTU1134	0	0	0	0	0	7	0	0	0	0	0	0	0	0	0	0	0	0	0	0	0	0	0	0	0	0	0	0	0	0	0	0	0	0	0	0	0	0	7
d__Bacteria	k__norank	p__Spirochaetae	c__Spirochaetes	o__Spirochaetales	f__Spirochaetaceae	g__Treponema_2	s__unclassified_g__Treponema_2	OTU641	0	0	0	13	8	3	0	0	0	0	0	0	0	0	0	0	0	0	0	0	0	0	0	0	0	0	0	0	0	0	0	0	0	0	0	0	0	0	24
d__Bacteria	k__norank	p__Proteobacteria	c__Gammaproteobacteria	o__Legionellales	f__Legionellaceae	g__Legionella	s__uncultured_bacterium_g__Legionella	OTU1340	0	0	0	0	0	0	0	4	0	0	0	0	0	0	0	0	0	0	0	1	3	1	0	0	1	0	1	0	0	0	0	0	1	0	0	0	0	0	12
d__Bacteria	k__norank	p__Cyanobacteria	c__Cyanobacteria	o__SubsectionIV	f__FamilyI_o__SubsectionIV	g__Scytonema	s__Phormidiaceae_cyanobacterium_8PC	OTU440	83	0	14	1	0	0	0	0	0	0	0	0	0	0	0	0	0	0	0	0	0	0	0	0	0	0	0	0	0	0	0	0	0	0	0	0	0	0	98
d__Bacteria	k__norank	p__Bacteroidetes	c__Bacteroidia	o__Bacteroidales	f__Prevotellaceae	g__Prevotella_9	s__uncultured_bacterium_g__Prevotella_9	OTU1400	2	0	12	0	0	0	0	0	1	0	11	155	0	0	0	0	0	0	0	1	0	0	1	0	0	0	0	0	0	1	0	0	1	0	0	0	4	0	189
d__Bacteria	k__norank	p__Proteobacteria	c__Deltaproteobacteria	o__Desulfobacterales	f__Desulfobulbaceae	g__Desulfobulbus	s__uncultured_rumen_bacterium_g__Desulfobulbus	OTU1112	0	0	0	0	0	8	0	0	0	0	0	0	0	0	0	0	0	0	0	0	0	0	0	0	0	0	0	0	0	0	0	0	0	0	0	0	0	0	8
d__Bacteria	k__norank	p__Proteobacteria	c__Betaproteobacteria	o__Nitrosomonadales	f__Nitrosomonadaceae	g__norank_f__Nitrosomonadaceae	s__unclassified_g__norank_f__Nitrosomonadaceae	OTU29	17	0	1	0	0	1	0	0	0	0	0	0	0	0	0	0	0	0	0	0	2	0	0	0	0	0	0	0	0	0	0	0	0	0	0	0	0	0	21
d__Bacteria	k__norank	p__Firmicutes	c__Clostridia	o__Clostridiales	f__Ruminococcaceae	g__Saccharofermentans	s__unclassified_g__Saccharofermentans	OTU632	0	0	92	60	126	41	0	0	0	0	0	0	0	0	0	0	0	0	0	0	0	0	0	0	0	0	0	0	0	0	0	0	0	0	0	0	0	0	319
d__Bacteria	k__norank	p__Nitrospirae	c__Nitrospira	o__norank_c__Nitrospira	f__norank_c__Nitrospira	g__Nitrospira	s__unclassified_g__Nitrospira	OTU608	0	0	13	0	0	0	0	0	0	0	0	0	0	0	0	0	0	0	0	0	2	0	0	0	0	0	0	0	0	0	0	0	0	0	0	0	0	0	15
d__Bacteria	k__norank	p__Firmicutes	c__Clostridia	o__Clostridiales	f__Peptococcaceae	g__norank_f__Peptococcaceae	s__uncultured_rumen_bacterium_g__norank_f__Peptococcaceae	OTU770	0	0	0	0	13	5	0	0	0	0	0	0	0	0	0	0	0	0	0	0	0	0	0	0	0	0	0	0	0	0	0	0	0	0	0	0	0	0	18
d__Bacteria	k__norank	p__Cyanobacteria	c__Cyanobacteria	o__Obscuribacterales	f__norank_o__Obscuribacterales	g__norank_o__Obscuribacterales	s__unclassified_g__norank_o__Obscuribacterales	OTU1223	0	0	0	0	0	8	0	0	0	0	0	0	0	0	0	0	0	0	0	0	0	0	0	0	0	0	0	0	0	0	0	1	0	0	0	0	0	0	9
d__Bacteria	k__norank	p__Bacteroidetes	c__Bacteroidia	o__Bacteroidales	f__Rikenellaceae	g__Rikenellaceae_RC9_gut_group	s__unclassified_g__Rikenellaceae_RC9_gut_group	OTU1061	0	0	19	5	45	23	0	0	0	0	0	0	0	0	0	0	0	0	0	0	0	0	0	0	0	0	0	0	0	0	0	0	0	0	0	0	0	0	92
d__Bacteria	k__norank	p__Firmicutes	c__Erysipelotrichia	o__Erysipelotrichales	f__Erysipelotrichaceae	g__unclassified_f__Erysipelotrichaceae	s__unclassified_f__Erysipelotrichaceae	OTU858	0	0	0	0	36	0	0	0	0	0	0	0	0	0	0	0	0	0	0	0	0	0	0	0	0	0	0	0	0	0	0	0	0	0	0	0	0	0	36
d__Bacteria	k__norank	p__Chloroflexi	c__Chloroflexia	o__Chloroflexales	f__Roseiflexaceae	g__Roseiflexus	s__unclassified_g__Roseiflexus	OTU170	0	10	0	0	0	0	0	0	0	0	0	0	0	0	0	0	0	0	0	0	0	0	0	0	0	0	0	0	0	0	0	0	0	0	0	0	0	0	10
d__Bacteria	k__norank	p__Firmicutes	c__Clostridia	o__Clostridiales	f__Ruminococcaceae	g__Ruminococcaceae_UCG-009	s__unclassified_g__Ruminococcaceae_UCG-009	OTU965	0	0	0	0	19	2	0	0	0	0	0	0	0	0	0	0	0	0	0	0	0	0	0	0	0	0	0	0	0	0	0	0	0	0	0	0	0	0	21
d__Bacteria	k__norank	p__Proteobacteria	c__Alphaproteobacteria	o__Rhodobacterales	f__Rhodobacteraceae	g__unclassified_f__Rhodobacteraceae	s__unclassified_f__Rhodobacteraceae	OTU1526	4	0	0	0	0	4	0	0	0	0	2	0	0	1	0	0	0	0	8	14	8	10	6	2	2	4	3	2	0	3	0	0	9	0	0	0	0	0	82
d__Bacteria	k__norank	p__Proteobacteria	c__Betaproteobacteria	o__Neisseriales	f__Neisseriaceae	g__Chitinilyticum	s__Chitinilyticum_aquatile	OTU2031	7	0	0	0	5	0	0	0	0	0	0	0	0	0	0	0	0	0	0	0	0	0	0	0	0	0	0	0	1	1	0	0	0	0	0	0	0	0	14
d__Bacteria	k__norank	p__Proteobacteria	c__Betaproteobacteria	o__SC-I-84	f__norank_o__SC-I-84	g__norank_o__SC-I-84	s__uncultured_bacterium_g__norank_o__SC-I-84	OTU2005	0	0	0	0	0	0	0	0	0	0	0	0	0	0	0	0	0	0	45	73	24	69	19	21	14	21	19	30	1	0	0	0	1	0	0	0	0	0	337
d__Bacteria	k__norank	p__Actinobacteria	c__Actinobacteria	o__Gaiellales	f__norank_o__Gaiellales	g__norank_o__Gaiellales	s__uncultured_actinobacterium_g__norank	OTU738	0	0	0	6	0	0	0	0	0	0	0	0	0	0	0	0	0	0	0	0	0	0	0	0	0	0	0	0	0	0	0	0	0	0	0	0	0	0	6
d__Bacteria	k__norank	p__Firmicutes	c__Clostridia	o__Clostridiales	f__Lachnospiraceae	g__Butyrivibrio_2	s__uncultured_rumen_bacterium_g__Butyrivibrio_2	OTU1088	0	0	0	0	0	14	0	0	0	0	0	0	0	0	0	0	0	0	0	0	0	0	0	0	0	0	0	0	0	0	0	0	0	0	0	0	0	0	14
d__Bacteria	k__norank	p__Firmicutes	c__Bacilli	o__Lactobacillales	f__Enterococcaceae	g__Vagococcus	s__Vagococcus_fluvialis	OTU1380	0	0	0	0	0	0	0	18	0	0	10	0	0	0	0	0	0	0	0	0	0	0	0	0	0	0	0	0	0	0	0	0	4	0	0	0	7	0	39
d__Bacteria	k__norank	p__Saccharibacteria	c__norank_p__Saccharibacteria	o__norank_p__Saccharibacteria	f__norank_p__Saccharibacteria	g__norank_p__Saccharibacteria	s__uncultured_soil_bacterium_g__norank_p__Saccharibacteria	OTU1906	0	0	0	0	0	0	0	0	0	0	0	0	0	0	0	0	0	0	1	3	0	2	1	0	2	1	0	2	0	0	0	0	0	0	0	0	0	0	12
d__Bacteria	k__norank	p__Cyanobacteria	c__Cyanobacteria	o__norank_c__Cyanobacteria	f__norank_c__Cyanobacteria	g__norank_c__Cyanobacteria	s__Staurastrum_punctulatum	OTU1547	0	0	0	0	0	0	0	0	0	0	0	0	0	0	0	0	0	0	5	4	1	0	2	8	1	3	2	1	0	0	0	0	0	0	0	0	0	0	27
d__Bacteria	k__norank	p__Proteobacteria	c__Betaproteobacteria	o__Burkholderiales	f__Burkholderiaceae	g__Ralstonia	s__unclassified_g__Ralstonia	OTU1281	0	10	8	4	0	0	4	4	1	6	1	0	0	0	0	0	0	0	1	1	40	1	30	1	2	1	0	1	1	1	1	1	11	0	6	0	17	0	154
d__Bacteria	k__norank	p__Proteobacteria	c__Gammaproteobacteria	o__Legionellales	f__Legionellaceae	g__Legionella	s__uncultured_Legionellales_bacterium_g__Legionella	OTU230	0	10	0	0	0	0	0	0	0	0	0	0	0	0	0	0	0	0	0	0	0	0	0	0	0	0	0	0	0	0	0	0	0	0	0	0	0	0	10
d__Bacteria	k__norank	p__unclassified_k__norank	c__unclassified_k__norank	o__unclassified_k__norank	f__unclassified_k__norank	g__unclassified_k__norank	s__unclassified_k__norank	OTU1037	0	0	0	0	13	0	0	0	0	0	0	0	0	0	0	0	0	0	0	0	0	0	0	0	0	0	0	0	0	0	0	0	0	0	0	0	0	0	13
d__Bacteria	k__norank	p__Acidobacteria	c__Acidobacteria	o__norank_c__Acidobacteria	f__norank_c__Acidobacteria	g__norank_c__Acidobacteria	s__uncultured_bacterium_293	OTU126	10	0	0	0	0	0	0	0	0	0	0	0	0	0	0	0	0	0	0	0	0	0	0	0	0	0	0	0	0	0	0	0	0	0	0	0	0	0	10
d__Bacteria	k__norank	p__Actinobacteria	c__Actinobacteria	o__Gaiellales	f__norank_o__Gaiellales	g__norank_o__Gaiellales	s__uncultured_Rubrobacterales_bacterium_g__norank	OTU129	7	0	6	1	0	2	0	0	0	0	0	0	0	0	0	0	0	0	0	0	0	0	0	0	0	0	0	0	0	0	0	0	0	0	0	0	0	0	16
d__Bacteria	k__norank	p__Bacteroidetes	c__Bacteroidia	o__Bacteroidales	f__Prevotellaceae	g__unclassified_f__Prevotellaceae	s__unclassified_f__Prevotellaceae	OTU910	0	0	5	21	42	5	0	0	0	0	0	0	0	0	0	0	0	0	0	0	0	0	0	0	0	0	0	0	0	0	0	0	0	0	0	0	0	0	73
d__Bacteria	k__norank	p__Chloroflexi	c__Anaerolineae	o__Anaerolineales	f__Anaerolineaceae	g__norank_f__Anaerolineaceae	s__unclassified_g__norank_f__Anaerolineaceae	OTU1543	0	0	0	0	0	0	0	0	0	0	0	0	0	0	0	0	0	0	9	14	0	0	1	1	2	1	0	2	0	0	0	0	0	0	0	0	0	0	30
d__Bacteria	k__norank	p__Bacteroidetes	c__Bacteroidia	o__Bacteroidales	f__Prevotellaceae	g__Prevotella_1	s__unclassified_g__Prevotella_1	OTU585	0	0	11	0	0	0	0	0	0	0	0	0	0	0	0	0	0	0	0	0	0	0	0	0	0	0	0	0	0	0	0	0	0	0	0	0	0	0	11
d__Bacteria	k__norank	p__Chloroflexi	c__Caldilineae	o__Caldilineales	f__Caldilineaceae	g__norank_f__Caldilineaceae	s__unclassified_g__norank_f__Caldilineaceae	OTU800	0	0	0	0	8	0	0	0	0	0	0	0	0	0	0	0	0	0	0	0	0	0	0	0	0	0	0	0	0	0	0	0	0	0	0	0	0	0	8
d__Bacteria	k__norank	p__Proteobacteria	c__Deltaproteobacteria	o__Desulfobacterales	f__Desulfobacteraceae	g__Desulfatirhabdium	s__uncultured_bacterium_g__Desulfatirhabdium	OTU1715	0	0	0	0	0	0	0	0	0	0	0	0	0	0	0	0	0	0	8	13	7	9	8	1	0	0	2	4	0	0	0	0	0	0	0	0	0	0	52
d__Bacteria	k__norank	p__Proteobacteria	c__Deltaproteobacteria	o__Bradymonadales	f__norank_o__Bradymonadales	g__norank_o__Bradymonadales	s__uncultured_rumen_bacterium_g__norank_o__Bradymonadales	OTU826	0	0	0	0	20	0	0	0	0	0	0	0	0	0	0	0	0	0	0	0	0	0	0	0	0	0	0	0	0	0	0	0	0	0	0	0	0	0	20
d__Bacteria	k__norank	p__Firmicutes	c__Bacilli	o__Lactobacillales	f__Streptococcaceae	g__Lactococcus	s__Lactococcus_hircilactis	OTU534	0	0	6	0	0	0	0	0	0	0	0	0	0	0	0	0	0	0	0	0	0	0	0	0	0	0	0	0	0	0	0	0	0	0	0	0	0	0	6
d__Bacteria	k__norank	p__Proteobacteria	c__Betaproteobacteria	o__Rhodocyclales	f__Rhodocyclaceae	g__unclassified_f__Rhodocyclaceae	s__unclassified_f__Rhodocyclaceae	OTU1149	0	0	0	0	0	2	0	0	0	0	0	0	0	0	0	0	0	0	0	0	0	0	0	0	0	0	0	0	0	0	0	0	0	0	0	0	0	0	2
d__Bacteria	k__norank	p__Proteobacteria	c__Alphaproteobacteria	o__Rhodospirillales	f__Acetobacteraceae	g__Roseomonas	s__unclassified_g__Roseomonas	OTU1934	15	5	8	6	4	4	8	31	0	0	1	0	0	2	0	0	0	0	103	110	47	62	62	32	10	31	21	31	14	13	0	2	36	0	0	0	0	0	658
d__Bacteria	k__norank	p__Actinobacteria	c__Actinobacteria	o__Gaiellales	f__unclassified_o__Gaiellales	g__unclassified_o__Gaiellales	s__unclassified_o__Gaiellales	OTU1055	0	0	0	0	13	0	0	0	0	0	0	0	0	0	0	0	0	0	0	0	0	0	0	0	0	0	0	0	0	0	0	0	0	0	0	0	0	0	13
d__Bacteria	k__norank	p__Verrucomicrobia	c__Verrucomicrobiae	o__Verrucomicrobiales	f__Verrucomicrobiaceae	g__unclassified_f__Verrucomicrobiaceae	s__unclassified_f__Verrucomicrobiaceae	OTU1770	0	0	0	0	0	0	0	0	0	0	0	0	0	0	0	0	0	0	13	13	2	9	5	14	1	1	0	7	0	0	0	0	0	0	0	0	0	0	65
d__Bacteria	k__norank	p__Gemmatimonadetes	c__Gemmatimonadetes	o__norank_c__Gemmatimonadetes	f__norank_c__Gemmatimonadetes	g__norank_c__Gemmatimonadetes	s__uncultured_soil_bacterium_g__norank_c__Gemmatimonadetes	OTU21	19	0	0	0	0	0	0	0	0	0	0	0	0	0	0	0	0	0	0	0	0	0	0	0	0	0	0	0	0	0	0	0	0	0	0	0	0	0	19
d__Bacteria	k__norank	p__Bacteroidetes	c__Bacteroidia	o__Bacteroidales	f__Prevotellaceae	g__unclassified_f__Prevotellaceae	s__unclassified_f__Prevotellaceae	OTU1254	0	11	39	6	90	79	0	0	0	0	0	0	0	0	0	0	0	0	0	0	0	0	0	0	0	0	0	0	0	0	0	0	0	0	0	0	0	0	225
d__Bacteria	k__norank	p__Proteobacteria	c__Gammaproteobacteria	o__unclassified_c__Gammaproteobacteria	f__unclassified_c__Gammaproteobacteria	g__unclassified_c__Gammaproteobacteria	s__unclassified_c__Gammaproteobacteria	OTU786	0	0	0	0	19	0	0	0	0	0	0	0	0	0	0	0	0	0	0	0	0	0	0	0	0	0	0	0	0	0	0	0	0	0	0	0	0	0	19
d__Bacteria	k__norank	p__Chloroflexi	c__Anaerolineae	o__Anaerolineales	f__Anaerolineaceae	g__norank_f__Anaerolineaceae	s__uncultured_sludge_bacterium_S41	OTU465	0	0	15	0	0	0	0	0	0	0	0	0	0	0	0	0	0	0	0	0	0	0	0	0	0	0	0	0	0	0	0	0	0	0	0	0	0	0	15
d__Bacteria	k__norank	p__Saccharibacteria	c__norank_p__Saccharibacteria	o__norank_p__Saccharibacteria	f__norank_p__Saccharibacteria	g__norank_p__Saccharibacteria	s__unclassified_g__norank_p__Saccharibacteria	OTU116	19	0	0	0	0	0	0	0	0	0	0	0	0	0	0	0	0	0	0	0	0	0	0	0	0	0	0	0	0	0	0	0	1	0	0	0	0	0	20
d__Bacteria	k__norank	p__Planctomycetes	c__Planctomycetacia	o__Planctomycetales	f__Planctomycetaceae	g__Pir4_lineage	s__unclassified_g__Pir4_lineage	OTU100	12	0	0	0	0	0	0	0	0	0	0	0	0	0	0	0	0	0	0	0	0	0	0	0	0	0	0	0	0	0	0	0	0	0	0	0	0	0	12
d__Bacteria	k__norank	p__Verrucomicrobia	c__Verrucomicrobiae	o__Verrucomicrobiales	f__Verrucomicrobiaceae	g__unclassified_f__Verrucomicrobiaceae	s__unclassified_f__Verrucomicrobiaceae	OTU1567	0	0	0	0	0	0	0	0	0	0	0	0	0	0	0	0	0	0	6	4	0	0	0	3	1	0	0	0	0	0	0	0	0	0	0	0	0	0	14
d__Bacteria	k__norank	p__Firmicutes	c__Bacilli	o__Lactobacillales	f__Streptococcaceae	g__Streptococcus	s__unclassified_g__Streptococcus	OTU1129	0	0	0	0	1	4	0	0	0	0	0	0	0	0	0	0	0	0	0	0	0	0	0	0	0	0	0	0	0	0	0	0	0	0	0	0	0	0	5
d__Bacteria	k__norank	p__TM6__Dependentiae_	c__norank_p__TM6__Dependentiae_	o__norank_p__TM6__Dependentiae_	f__norank_p__TM6__Dependentiae_	g__norank_p__TM6__Dependentiae_	s__uncultured_Verrucomicrobia_bacterium_g__norank_p__TM6__Dependentiae_	OTU243	0	5	0	0	0	0	0	0	0	0	0	0	0	0	0	0	0	0	0	2	0	0	0	0	0	0	1	0	0	0	0	0	0	0	0	0	0	0	8
d__Bacteria	k__norank	p__Proteobacteria	c__Deltaproteobacteria	o__NB1-j	f__norank_o__NB1-j	g__norank_o__NB1-j	s__unclassified_g__norank_o__NB1-j	OTU1766	0	0	0	0	0	0	1	0	0	0	0	0	0	0	0	0	0	0	5	5	0	7	2	1	1	2	2	2	0	0	0	0	0	0	0	0	0	0	28
d__Bacteria	k__norank	p__Bacteroidetes	c__Bacteroidia	o__Bacteroidales	f__Prevotellaceae	g__Alloprevotella	s__unclassified_g__Alloprevotella	OTU105	10	0	0	0	0	0	0	0	0	0	0	0	0	0	0	0	0	0	0	0	0	0	0	0	0	0	0	0	0	0	0	0	0	0	0	0	0	0	10
d__Bacteria	k__norank	p__Actinobacteria	c__Actinobacteria	o__norank_c__Actinobacteria	f__norank_c__Actinobacteria	g__norank_c__Actinobacteria	s__unclassified_g__norank_c__Actinobacteria	OTU1564	2	0	0	0	0	0	0	0	0	0	0	0	0	0	0	0	0	0	6	8	14	2	2	2	1	3	0	1	0	0	0	0	0	0	0	0	0	0	41
d__Bacteria	k__norank	p__Bacteroidetes	c__Bacteroidia	o__Bacteroidales	f__Rikenellaceae	g__Rikenellaceae_RC9_gut_group	s__unclassified_g__Rikenellaceae_RC9_gut_group	OTU614	0	0	29	2	0	3	0	0	0	0	0	0	0	0	0	0	0	0	0	0	0	0	0	0	0	0	0	0	0	0	0	0	0	0	0	0	0	0	34
d__Bacteria	k__norank	p__Actinobacteria	c__Actinobacteria	o__PeM15	f__norank_o__PeM15	g__norank_o__PeM15	s__unclassified_g__norank_o__PeM15	OTU1430	0	0	0	0	0	0	14	4	0	1	0	0	0	0	0	0	0	0	215	170	290	183	29	72	27	75	47	127	0	9	1	0	63	0	0	0	0	0	1327
d__Bacteria	k__norank	p__Proteobacteria	c__Gammaproteobacteria	o__Legionellales	f__Coxiellaceae	g__Coxiella	s__unclassified_g__Coxiella	OTU1777	0	0	0	0	0	0	0	0	0	0	0	0	0	0	0	0	0	0	1	0	0	1	0	0	0	0	0	0	0	0	0	0	0	0	0	0	0	0	2
d__Bacteria	k__norank	p__Proteobacteria	c__Deltaproteobacteria	o__Deltaproteobacteria_Incertae_Sedis	f__Syntrophorhabdaceae	g__Syntrophorhabdus	s__unclassified_g__Syntrophorhabdus	OTU1485	0	0	0	0	0	0	0	0	0	0	0	0	0	0	0	0	0	0	2	1	0	1	0	0	1	0	0	4	0	0	0	0	0	0	0	0	0	0	9
d__Bacteria	k__norank	p__Proteobacteria	c__Alphaproteobacteria	o__Rhodospirillales	f__Rhodospirillales_Incertae_Sedis	g__Reyranella	s__uncultured_bacterium_g__Reyranella	OTU1573	0	0	0	0	0	0	0	0	0	0	0	0	0	0	0	0	0	0	0	0	6	2	0	0	0	0	0	0	0	0	0	0	0	0	0	0	0	0	8
d__Bacteria	k__norank	p__Proteobacteria	c__Alphaproteobacteria	o__Rhizobiales	f__unclassified_o__Rhizobiales	g__unclassified_o__Rhizobiales	s__unclassified_o__Rhizobiales	OTU492	0	0	4	0	0	0	0	0	0	0	0	0	0	0	0	0	0	0	0	1	4	1	0	0	0	0	0	0	0	0	0	0	3	0	0	0	0	0	13
d__Bacteria	k__norank	p__Cyanobacteria	c__Cyanobacteria	o__norank_c__Cyanobacteria	f__norank_c__Cyanobacteria	g__norank_c__Cyanobacteria	s__unclassified_g__norank_c__Cyanobacteria	OTU1987	0	0	0	0	0	0	0	0	0	0	0	0	0	0	0	0	0	0	2	4	1	3	0	0	0	1	0	1	0	0	0	0	0	0	0	0	0	0	12
d__Bacteria	k__norank	p__Bacteroidetes	c__Bacteroidia	o__Bacteroidales	f__Bacteroidales_BS11_gut_group	g__norank_f__Bacteroidales_BS11_gut_group	s__unclassified_g__norank_f__Bacteroidales_BS11_gut_group	OTU673	0	0	15	8	20	7	0	0	0	0	0	0	0	0	0	0	0	0	0	0	0	0	0	0	0	0	0	0	0	0	0	0	0	0	0	0	0	0	50
d__Bacteria	k__norank	p__Gemmatimonadetes	c__Gemmatimonadetes	o__Gemmatimonadales	f__Gemmatimonadaceae	g__norank_f__Gemmatimonadaceae	s__unclassified_g__norank_f__Gemmatimonadaceae	OTU925	0	0	0	0	9	0	0	0	0	0	0	0	0	0	0	0	0	0	0	0	0	0	1	0	0	0	0	1	0	0	0	0	0	0	0	0	0	0	11
d__Bacteria	k__norank	p__Spirochaetae	c__Spirochaetes	o__Spirochaetales	f__PL-11B10	g__norank_f__PL-11B10	s__uncultured_bacterium_g__norank_f__PL-11B10	OTU597	0	0	12	0	0	0	0	0	0	0	0	0	0	0	0	0	0	0	0	0	0	0	0	0	0	0	0	0	0	0	0	0	0	0	0	0	0	0	12
d__Bacteria	k__norank	p__Chloroflexi	c__KD4-96	o__norank_c__KD4-96	f__norank_c__KD4-96	g__norank_c__KD4-96	s__uncultured_Anaerolineaceae_bacterium_g__norank_c__KD4-96	OTU289	0	0	5	0	0	0	0	0	0	0	0	0	0	0	0	0	0	0	0	0	5	1	0	0	0	0	0	0	0	0	0	0	0	0	0	0	0	0	11
d__Bacteria	k__norank	p__Actinobacteria	c__Actinobacteria	o__Micrococcales	f__Intrasporangiaceae	g__Tetrasphaera	s__uncultured_bacterium_g__Tetrasphaera	OTU2012	0	7	2	0	3	3	1	9	0	1	8	0	0	0	0	0	0	0	6	5	17	6	1	3	2	2	0	3	34	37	1	13	323	1	0	0	0	0	488
d__Bacteria	k__norank	p__Proteobacteria	c__Deltaproteobacteria	o__Bdellovibrionales	f__Bacteriovoracaceae	g__Deferrisoma	s__unclassified_g__Deferrisoma	OTU227	0	22	0	0	0	0	0	0	0	0	0	0	0	0	0	0	0	0	0	0	0	0	0	0	0	0	0	0	0	0	0	0	0	0	0	0	0	0	22
d__Bacteria	k__norank	p__Proteobacteria	c__Betaproteobacteria	o__Nitrosomonadales	f__Nitrosomonadaceae	g__norank_f__Nitrosomonadaceae	s__unclassified_g__norank_f__Nitrosomonadaceae	OTU400	0	0	20	0	0	1	0	0	0	0	0	0	0	0	0	0	0	0	0	0	0	0	0	0	0	0	0	0	0	0	0	0	0	0	0	0	0	0	21
d__Bacteria	k__norank	p__Proteobacteria	c__Gammaproteobacteria	o__HTA4	f__norank_o__HTA4	g__norank_o__HTA4	s__uncultured_bacterium_g__norank_o__HTA4	OTU1827	0	0	0	0	0	0	0	0	0	0	0	0	0	0	0	0	0	0	1	0	0	1	1	0	0	4	0	0	0	0	0	0	0	0	0	0	0	0	7
d__Bacteria	k__norank	p__Bacteroidetes	c__Sphingobacteriia	o__Sphingobacteriales	f__Sphingobacteriaceae	g__Pedobacter	s__unclassified_g__Pedobacter	OTU499	0	0	11	0	0	0	0	0	0	0	0	0	0	0	0	0	0	0	0	0	0	0	0	0	0	0	0	0	0	0	0	0	0	0	0	0	0	0	11
d__Bacteria	k__norank	p__Proteobacteria	c__Gammaproteobacteria	o__Pseudomonadales	f__Pseudomonadaceae	g__Pseudomonas	s__unclassified_g__Pseudomonas	OTU1146	41	34	70	16	36	13	61	12	3	5	2	2	0	0	0	0	0	0	8	29	3	79	20	50	80	66	51	90	0	0	0	0	1	0	1	0	0	0	773
d__Bacteria	k__norank	p__Bacteroidetes	c__Bacteroidia	o__Bacteroidales	f__Bacteroidales_BS11_gut_group	g__norank_f__Bacteroidales_BS11_gut_group	s__unclassified_g__norank_f__Bacteroidales_BS11_gut_group	OTU662	0	0	12	6	10	0	0	0	0	0	0	0	0	0	0	0	0	0	0	0	0	0	0	0	0	0	0	0	0	0	0	0	0	0	1	0	0	0	29
d__Bacteria	k__norank	p__Bacteroidetes	c__Bacteroidia	o__Bacteroidales	f__Rikenellaceae	g__Rikenellaceae_RC9_gut_group	s__unclassified_g__Rikenellaceae_RC9_gut_group	OTU721	0	0	13	18	30	9	0	0	0	0	0	0	0	0	0	0	0	0	0	0	0	0	0	0	0	0	0	0	0	0	0	0	0	0	0	0	0	0	70
d__Bacteria	k__norank	p__Proteobacteria	c__Betaproteobacteria	o__Nitrosomonadales	f__Gallionellaceae	g__unclassified_f__Gallionellaceae	s__unclassified_f__Gallionellaceae	OTU95	18	0	0	0	0	0	0	0	0	0	0	0	0	0	0	0	0	0	0	0	0	0	0	0	0	0	0	0	0	0	0	0	0	0	0	0	0	0	18
d__Bacteria	k__norank	p__Actinobacteria	c__Actinobacteria	o__Coriobacteriales	f__Coriobacteriaceae	g__Enterorhabdus	s__uncultured_bacterium_g__Enterorhabdus	OTU639	0	0	0	12	0	0	0	0	0	0	0	0	0	0	0	0	0	0	0	0	0	0	0	0	0	0	0	0	0	0	0	0	0	0	0	0	0	0	12
d__Bacteria	k__norank	p__Gemmatimonadetes	c__Gemmatimonadetes	o__Gemmatimonadales	f__Gemmatimonadaceae	g__norank_f__Gemmatimonadaceae	s__unclassified_g__norank_f__Gemmatimonadaceae	OTU240	0	5	0	0	0	0	0	0	0	0	0	0	0	0	0	0	0	0	0	0	0	0	0	0	0	0	0	0	0	0	0	0	0	0	0	0	0	0	5
d__Bacteria	k__norank	p__Firmicutes	c__Clostridia	o__Clostridiales	f__Christensenellaceae	g__Christensenellaceae_R-7_group	s__uncultured_bacterium_g__Christensenellaceae_R-7_group	OTU2128	0	0	0	0	0	0	0	0	0	1	0	0	0	0	0	0	0	0	0	0	0	0	0	0	0	0	0	0	0	4	0	0	13	0	0	0	0	0	18
d__Bacteria	k__norank	p__Proteobacteria	c__Gammaproteobacteria	o__unclassified_c__Gammaproteobacteria	f__unclassified_c__Gammaproteobacteria	g__unclassified_c__Gammaproteobacteria	s__unclassified_c__Gammaproteobacteria	OTU1673	0	0	0	0	0	0	0	0	0	0	0	0	0	0	0	0	0	0	0	1	7	2	2	0	0	0	0	0	0	0	0	0	1	0	0	0	0	0	13
d__Bacteria	k__norank	p__Verrucomicrobia	c__WCHB1-41	o__norank_c__WCHB1-41	f__norank_c__WCHB1-41	g__norank_c__WCHB1-41	s__uncultured_rumen_bacterium_g__norank_c__WCHB1-41	OTU774	0	7	0	9	53	27	0	0	0	0	0	0	0	0	0	0	0	0	0	0	0	0	0	0	0	0	0	0	0	0	0	0	0	0	0	0	0	0	96
d__Bacteria	k__norank	p__Bacteroidetes	c__Bacteroidetes_vadinHA17	o__norank_c__Bacteroidetes_vadinHA17	f__norank_c__Bacteroidetes_vadinHA17	g__norank_c__Bacteroidetes_vadinHA17	s__unclassified_g__norank_c__Bacteroidetes_vadinHA17	OTU102	16	0	0	1	0	0	0	0	0	0	0	0	0	0	0	0	0	0	0	0	0	0	0	0	0	0	0	0	0	0	0	0	0	0	0	0	0	0	17
d__Bacteria	k__norank	p__Lentisphaerae	c__Lentisphaeria	o__Victivallales	f__vadinBE97	g__norank_f__vadinBE97	s__uncultured_bacterium_g__norank_f__vadinBE97	OTU700	0	0	0	8	0	0	0	0	0	0	0	0	0	0	0	0	0	0	0	0	0	0	0	0	0	0	0	0	0	0	0	0	0	0	0	0	0	0	8
d__Bacteria	k__norank	p__Proteobacteria	c__Alphaproteobacteria	o__Rhizobiales	f__JG34-KF-361	g__norank_f__JG34-KF-361	s__unclassified_g__norank_f__JG34-KF-361	OTU501	0	0	13	0	0	0	0	0	0	0	0	0	0	0	0	0	0	0	0	0	0	0	0	0	0	0	0	0	0	0	0	0	0	0	0	0	0	0	13
d__Bacteria	k__norank	p__Bacteroidetes	c__Bacteroidetes_vadinHA17	o__norank_c__Bacteroidetes_vadinHA17	f__norank_c__Bacteroidetes_vadinHA17	g__norank_c__Bacteroidetes_vadinHA17	s__unclassified_g__norank_c__Bacteroidetes_vadinHA17	OTU298	0	0	25	0	0	0	0	0	0	0	0	0	0	0	0	0	0	0	0	0	0	0	0	0	0	0	0	0	0	0	0	0	0	0	0	0	0	0	25
d__Bacteria	k__norank	p__Acidobacteria	c__Acidobacteria	o__Blastocatellales	f__Blastocatellaceae__Subgroup_4_	g__RB41	s__unclassified_g__RB41	OTU740	3	9	0	3	5	0	0	0	0	0	0	0	0	0	0	0	0	0	0	1	0	0	0	0	0	0	0	0	0	0	0	0	0	0	0	0	0	0	21
d__Bacteria	k__norank	p__Firmicutes	c__Bacilli	o__Bacillales	f__Bacillaceae	g__Anoxybacillus	s__Anoxybacillus_flavithermus_subsp._flavithermus	OTU33	14	0	0	0	0	0	0	0	0	0	0	0	0	0	0	0	0	0	0	0	0	0	0	0	0	0	0	0	0	0	0	0	4	0	0	0	0	0	18
d__Bacteria	k__norank	p__Proteobacteria	c__Betaproteobacteria	o__Burkholderiales	f__Oxalobacteraceae	g__unclassified_f__Oxalobacteraceae	s__unclassified_f__Oxalobacteraceae	OTU379	1	0	14	0	0	0	0	0	0	0	0	0	0	0	0	0	0	0	0	0	0	0	0	0	0	0	0	0	0	0	0	0	0	0	0	0	0	0	15
d__Bacteria	k__norank	p__Proteobacteria	c__Deltaproteobacteria	o__Syntrophobacterales	f__Syntrophobacteraceae	g__unclassified_f__Syntrophobacteraceae	s__unclassified_f__Syntrophobacteraceae	OTU620	0	0	7	0	0	0	0	0	0	0	0	0	0	0	0	0	0	0	0	0	0	0	0	0	0	0	0	0	0	0	0	0	0	0	0	0	0	0	7
d__Bacteria	k__norank	p__Proteobacteria	c__Alphaproteobacteria	o__Rickettsiales	f__Mitochondria	g__norank_f__Mitochondria	s__unclassified_g__norank_f__Mitochondria	OTU474	0	0	5	0	0	0	0	0	0	0	0	0	0	0	0	0	0	0	0	0	0	0	0	0	0	0	0	0	0	0	0	0	0	0	0	0	0	0	5
d__Bacteria	k__norank	p__Chloroflexi	c__Anaerolineae	o__Anaerolineales	f__Anaerolineaceae	g__unclassified_f__Anaerolineaceae	s__unclassified_f__Anaerolineaceae	OTU1869	0	0	0	0	0	0	0	0	0	0	0	0	0	0	0	0	0	0	0	5	4	1	1	1	1	1	0	0	0	0	0	0	0	0	0	0	0	0	14
d__Bacteria	k__norank	p__Bacteroidetes	c__Bacteroidia	o__Bacteroidales	f__Prevotellaceae	g__Prevotellaceae_UCG-003	s__uncultured_rumen_bacterium_g__Prevotellaceae_UCG-003	OTU843	0	0	6	16	46	0	0	0	0	0	0	0	0	0	0	0	0	0	0	0	0	0	0	0	0	0	0	0	0	0	0	0	0	0	0	0	0	0	68
d__Bacteria	k__norank	p__Chloroflexi	c__TK10	o__norank_c__TK10	f__norank_c__TK10	g__norank_c__TK10	s__Chloroflexi_bacterium_OLB14	OTU627	0	0	6	0	0	0	0	0	0	0	0	0	0	0	0	0	0	0	0	0	0	0	0	0	0	0	0	0	0	0	0	0	0	0	0	0	0	0	6
d__Bacteria	k__norank	p__Proteobacteria	c__Alphaproteobacteria	o__Rhizobiales	f__Hyphomicrobiaceae	g__Devosia	s__unclassified_g__Devosia	OTU1307	0	5	0	0	0	0	4	8	0	0	0	0	0	3	0	0	0	0	0	0	0	0	0	0	0	0	0	0	0	1	0	0	1	0	0	0	1	0	23
d__Bacteria	k__norank	p__Deinococcus-Thermus	c__Deinococci	o__Deinococcales	f__Deinococcaceae	g__Deinococcus	s__unclassified_g__Deinococcus	OTU83	12	0	0	0	0	0	0	0	0	0	0	0	0	0	0	0	0	0	0	0	1	0	0	0	0	0	0	0	0	0	0	0	0	0	0	0	0	0	13
d__Bacteria	k__norank	p__Proteobacteria	c__Alphaproteobacteria	o__Rhizobiales	f__Hyphomicrobiaceae	g__unclassified_f__Hyphomicrobiaceae	s__unclassified_f__Hyphomicrobiaceae	OTU1902	0	0	0	0	0	0	0	0	0	0	0	0	0	0	0	0	0	0	4	6	3	3	1	4	1	2	2	3	1	0	0	0	0	0	0	0	0	0	30
d__Bacteria	k__norank	p__Acidobacteria	c__Acidobacteria	o__Blastocatellales	f__Blastocatellaceae__Subgroup_4_	g__RB41	s__unclassified_g__RB41	OTU1258	1	0	0	0	0	0	13	0	0	0	0	0	0	0	0	0	0	0	0	0	0	0	0	0	0	0	0	0	0	0	0	0	0	0	0	0	0	0	14
d__Bacteria	k__norank	p__Firmicutes	c__Clostridia	o__Clostridiales	f__Ruminococcaceae	g__Ruminiclostridium_1	s__uncultured_rumen_bacterium_g__Ruminiclostridium_1	OTU359	0	0	32	0	31	0	0	1	0	0	0	0	0	0	0	0	0	0	0	0	0	0	0	0	0	0	0	0	0	0	0	0	0	0	0	0	0	0	64
d__Bacteria	k__norank	p__Verrucomicrobia	c__Opitutae	o__Opitutae_vadinHA64	f__norank_o__Opitutae_vadinHA64	g__norank_o__Opitutae_vadinHA64	s__uncultured_bacterium_g__norank_o__Opitutae_vadinHA64	OTU1175	0	0	0	18	108	64	0	0	0	0	0	0	0	0	0	0	0	0	0	0	0	0	0	0	0	0	0	0	0	0	0	0	0	0	0	0	0	0	190
d__Bacteria	k__norank	p__Actinobacteria	c__Actinobacteria	o__Corynebacteriales	f__Nocardiaceae	g__Nocardia	s__Nocardia_nova	OTU420	0	0	18	0	0	0	0	0	0	0	0	0	0	0	0	0	0	0	0	0	0	0	0	1	0	0	0	0	0	0	0	0	0	0	0	0	0	0	19
d__Bacteria	k__norank	p__Proteobacteria	c__Alphaproteobacteria	o__Sphingomonadales	f__Erythrobacteraceae	g__unclassified_f__Erythrobacteraceae	s__unclassified_f__Erythrobacteraceae	OTU63	39	6	2	0	0	0	0	1	0	0	0	0	0	2	0	0	0	0	0	0	0	0	0	0	0	0	0	0	2	4	0	0	4	0	0	0	0	0	60
d__Bacteria	k__norank	p__Bacteroidetes	c__Bacteroidia	o__Bacteroidales	f__Bacteroidales_S24-7_group	g__norank_f__Bacteroidales_S24-7_group	s__uncultured_rumen_bacterium_g__norank_f__Bacteroidales_S24-7_group	OTU1132	0	0	0	22	21	18	0	0	0	0	0	0	0	0	0	0	0	0	0	0	0	0	0	0	0	0	0	0	0	0	0	0	0	0	0	0	0	0	61
d__Bacteria	k__norank	p__Proteobacteria	c__Betaproteobacteria	o__Burkholderiales	f__Comamonadaceae	g__Comamonas	s__unclassified_g__Comamonas	OTU1397	47	49	7	43	48	92	29	8	0	81	43	0	0	1	0	0	0	0	0	0	0	0	0	0	0	0	0	0	1	0	0	0	0	0	0	0	0	0	449
d__Bacteria	k__norank	p__Actinobacteria	c__Actinobacteria	o__Pseudonocardiales	f__Pseudonocardiaceae	g__Actinophytocola	s__uncultured_bacterium_g__Actinophytocola	OTU948	0	0	0	0	18	0	0	0	0	0	0	0	0	0	0	0	0	0	0	0	0	0	0	0	0	0	0	0	0	0	0	0	0	0	0	0	0	0	18
d__Bacteria	k__norank	p__unclassified_k__norank	c__unclassified_k__norank	o__unclassified_k__norank	f__unclassified_k__norank	g__unclassified_k__norank	s__unclassified_k__norank	OTU582	26	0	3	3	0	0	0	1	0	0	0	0	0	0	0	0	0	0	0	0	0	0	0	0	0	0	0	0	0	0	0	0	0	0	0	0	0	0	33
d__Bacteria	k__norank	p__Proteobacteria	c__Deltaproteobacteria	o__Syntrophobacterales	f__Syntrophaceae	g__Desulfobacca	s__unclassified_g__Desulfobacca	OTU1560	0	0	0	0	0	0	0	0	0	0	0	0	0	0	0	0	0	0	6	10	17	8	4	6	0	3	0	1	0	0	0	0	0	0	0	0	0	0	55
d__Bacteria	k__norank	p__Bacteroidetes	c__Bacteroidia	o__Bacteroidales	f__unclassified_o__Bacteroidales	g__unclassified_o__Bacteroidales	s__unclassified_o__Bacteroidales	OTU313	0	0	8	0	0	0	0	0	0	0	0	0	0	0	0	0	0	0	0	0	0	0	0	0	0	0	0	0	0	0	0	0	0	0	0	0	0	0	8
d__Bacteria	k__norank	p__Actinobacteria	c__Actinobacteria	o__Micrococcales	f__Brevibacteriaceae	g__Brevibacterium	s__unclassified_g__Brevibacterium	OTU1609	0	0	0	0	0	0	0	4	0	1	1	0	0	2	0	0	0	0	0	0	8	0	0	0	0	0	0	0	0	0	0	1	2	0	0	0	4	0	23
d__Bacteria	k__norank	p__Bacteroidetes	c__Bacteroidia	o__Bacteroidales	f__Prevotellaceae	g__Prevotella_1	s__unidentified_rumen_bacterium_RC11	OTU737	0	0	2	18	20	11	0	0	0	0	0	0	0	0	0	0	0	0	0	0	0	0	0	0	0	0	0	0	0	0	0	0	0	0	0	0	0	0	51
d__Bacteria	k__norank	p__Proteobacteria	c__Deltaproteobacteria	o__Myxococcales	f__Haliangiaceae	g__Haliangium	s__uncultured_Nannocystineae_bacterium_g__Haliangium	OTU477	0	0	13	0	0	0	0	0	0	0	0	0	0	0	0	0	0	0	0	0	0	0	0	0	0	0	0	0	0	0	0	0	0	0	0	0	0	0	13
d__Bacteria	k__norank	p__Actinobacteria	c__Actinobacteria	o__Pseudonocardiales	f__Pseudonocardiaceae	g__Pseudonocardia	s__unclassified_g__Pseudonocardia	OTU133	20	0	0	0	0	0	0	0	0	0	0	0	0	0	0	0	0	0	0	0	0	0	0	0	0	0	0	0	0	0	0	0	0	0	0	0	0	0	20
d__Bacteria	k__norank	p__Proteobacteria	c__Gammaproteobacteria	o__Legionellales	f__Legionellaceae	g__Legionella	s__uncultured_bacterium_g__Legionella	OTU1966	0	0	0	0	0	0	0	0	0	0	0	0	0	0	0	0	0	0	16	12	11	6	8	6	1	3	4	1	0	0	0	0	0	0	0	0	0	0	68
d__Bacteria	k__norank	p__Bacteroidetes	c__Bacteroidia	o__Bacteroidales	f__Bacteroidales_S24-7_group	g__norank_f__Bacteroidales_S24-7_group	s__uncultured_rumen_bacterium_g__norank_f__Bacteroidales_S24-7_group	OTU972	0	38	94	70	233	88	0	0	0	0	0	0	0	0	0	0	0	0	0	0	0	0	0	0	0	0	0	0	0	0	0	0	0	0	0	0	0	0	523
d__Bacteria	k__norank	p__Bacteroidetes	c__Bacteroidia	o__Bacteroidales	f__Prevotellaceae	g__Prevotellaceae_UCG-001	s__unclassified_g__Prevotellaceae_UCG-001	OTU370	0	0	16	0	11	0	0	0	0	0	0	0	0	0	0	0	0	0	0	0	0	0	0	0	0	0	0	0	0	0	0	0	0	0	0	0	0	0	27
d__Bacteria	k__norank	p__Proteobacteria	c__Epsilonproteobacteria	o__Campylobacterales	f__Campylobacteraceae	g__Campylobacter	s__unclassified_g__Campylobacter	OTU640	0	0	26	59	87	349	0	0	0	0	0	0	0	0	0	0	0	0	0	0	0	0	0	0	0	0	0	0	0	0	0	0	0	0	0	0	0	0	521
d__Bacteria	k__norank	p__Proteobacteria	c__Alphaproteobacteria	o__Rhizobiales	f__Phyllobacteriaceae	g__norank_f__Phyllobacteriaceae	s__uncultured_alpha_proteobacterium_g__norank_f__Phyllobacteriaceae	OTU1389	23	33	12	2	0	7	2	1	0	5	16	0	0	3	0	0	0	0	0	3	1	0	0	0	0	1	1	0	1	11	1	1	134	0	0	0	0	0	258
d__Bacteria	k__norank	p__Gemmatimonadetes	c__Gemmatimonadetes	o__Gemmatimonadales	f__Gemmatimonadaceae	g__Gemmatimonas	s__unclassified_g__Gemmatimonas	OTU314	0	0	27	0	0	0	0	0	0	0	0	0	0	0	0	0	0	0	0	0	0	0	0	0	0	0	0	0	0	0	0	0	0	0	0	0	0	0	27
d__Bacteria	k__norank	p__Gemmatimonadetes	c__Gemmatimonadetes	o__Longimicrobiales	f__Longimicrobiaceae	g__norank_f__Longimicrobiaceae	s__uncultured_bacterium_g__norank_f__Longimicrobiaceae	OTU23	24	0	0	0	0	0	0	0	0	0	0	0	0	0	0	0	0	0	0	0	0	0	0	0	0	0	0	0	0	0	0	0	0	0	0	0	0	0	24
d__Bacteria	k__norank	p__Firmicutes	c__Clostridia	o__Clostridiales	f__Lachnospiraceae	g__Lachnoclostridium	s__unclassified_g__Lachnoclostridium	OTU211	0	14	0	0	0	0	0	0	0	0	0	0	0	0	0	0	0	0	0	0	0	0	0	0	0	0	0	0	0	0	0	0	0	0	0	0	0	0	14
d__Bacteria	k__norank	p__Verrucomicrobia	c__WCHB1-41	o__norank_c__WCHB1-41	f__norank_c__WCHB1-41	g__norank_c__WCHB1-41	s__uncultured_rumen_bacterium_g__norank_c__WCHB1-41	OTU1128	0	1	7	53	157	55	0	0	0	0	0	0	0	0	0	0	0	0	0	0	0	0	0	0	0	0	0	0	0	0	0	0	0	0	0	0	0	0	273
d__Bacteria	k__norank	p__Proteobacteria	c__Gammaproteobacteria	o__Pseudomonadales	f__Moraxellaceae	g__Acinetobacter	s__unclassified_g__Acinetobacter	OTU1358	749	834	561	219	38	305	17	41	0	160	240	0	1	26	0	0	0	0	0	0	5	0	0	0	0	0	0	0	2	0	0	0	1	0	0	0	0	0	3199
d__Bacteria	k__norank	p__Bacteroidetes	c__Bacteroidia	o__Bacteroidales	f__Bacteroidales_S24-7_group	g__norank_f__Bacteroidales_S24-7_group	s__uncultured_bacterium_g__norank_f__Bacteroidales_S24-7_group	OTU281	2	8	7	2	0	2	0	0	0	0	0	0	0	0	0	1	2	0	0	0	0	0	0	0	0	0	0	0	0	0	0	0	0	0	0	0	0	0	24
d__Bacteria	k__norank	p__Actinobacteria	c__Actinobacteria	o__Micrococcales	f__unclassified_o__Micrococcales	g__unclassified_o__Micrococcales	s__unclassified_o__Micrococcales	OTU1626	0	0	1	0	0	0	0	0	0	0	0	0	0	0	0	0	0	0	13	14	17	3	5	8	1	4	1	0	0	0	0	0	1	0	0	0	0	0	68
d__Bacteria	k__norank	p__Microgenomates	c__Candidatus_Woesebacteria	o__norank_c__Candidatus_Woesebacteria	f__norank_c__Candidatus_Woesebacteria	g__norank_c__Candidatus_Woesebacteria	s__unclassified_g__norank_c__Candidatus_Woesebacteria	OTU1799	0	0	0	0	0	0	0	0	0	0	0	0	0	0	0	0	0	0	1	2	3	1	8	2	0	0	0	0	0	0	0	0	0	0	0	0	0	0	17
d__Bacteria	k__norank	p__Chloroflexi	c__Anaerolineae	o__Anaerolineales	f__Anaerolineaceae	g__norank_f__Anaerolineaceae	s__unclassified_g__norank_f__Anaerolineaceae	OTU1556	0	0	0	0	0	0	0	0	0	0	0	0	0	0	0	0	0	0	10	15	11	9	3	8	1	3	3	8	0	0	0	0	0	0	0	0	0	0	71
d__Bacteria	k__norank	p__Proteobacteria	c__Gammaproteobacteria	o__Pseudomonadales	f__Pseudomonadaceae	g__Pseudomonas	s__Pseudomonas_fragi	OTU1945	6	13	1	2	0	1	37	0	1	2	0	0	0	0	0	0	0	0	3521	3808	894	13754	4545	9687	14916	10046	4077	23176	0	0	0	0	74	0	0	0	0	0	88561
d__Bacteria	k__norank	p__Verrucomicrobia	c__Spartobacteria	o__Chthoniobacterales	f__Chthoniobacterales_Incertae_Sedis	g__Terrimicrobium	s__uncultured_bacterium_g__Terrimicrobium	OTU2116	25	11	18	50	28	60	113	946	1	3	0	0	0	5	0	0	0	0	0	0	0	0	0	0	0	0	0	0	23	17	1	19	62	0	0	0	0	0	1382
d__Bacteria	k__norank	p__Elusimicrobia	c__Elusimicrobia	o__Lineage_I	f__Unknown_Family_o__Lineage_I	g__Candidatus_Endomicrobium	s__uncultured_rumen_bacterium_g__Candidatus_Endomicrobium	OTU193	0	26	7	0	12	0	0	0	0	0	0	0	0	0	0	0	0	0	0	0	0	0	0	0	0	0	0	0	0	0	0	0	0	0	0	0	0	0	45
d__Bacteria	k__norank	p__Proteobacteria	c__Deltaproteobacteria	o__Desulfovibrionales	f__Desulfovibrionaceae	g__Desulfovibrio	s__Desulfovibrio_magneticus_RS-1	OTU1354	0	0	4	0	0	0	0	8	0	0	0	0	1	1	0	0	0	0	0	1	0	0	1	0	0	0	0	0	0	0	0	0	4	0	0	0	0	0	20
d__Bacteria	k__norank	p__Bacteroidetes	c__Bacteroidia	o__Bacteroidales	f__Bacteroidales_S24-7_group	g__norank_f__Bacteroidales_S24-7_group	s__uncultured_bacterium_g__norank_f__Bacteroidales_S24-7_group	OTU518	0	0	9	0	0	0	0	0	0	0	0	0	0	0	0	0	0	0	0	0	0	0	0	0	0	0	0	0	0	0	0	0	0	0	0	0	0	0	9
d__Bacteria	k__norank	p__Bacteroidetes	c__Bacteroidia	o__Bacteroidales	f__Bacteroidales_S24-7_group	g__norank_f__Bacteroidales_S24-7_group	s__uncultured_bacterium_g__norank_f__Bacteroidales_S24-7_group	OTU519	0	0	11	0	0	0	0	0	0	0	0	0	0	0	0	0	0	0	0	0	0	0	0	0	0	0	0	0	0	0	0	0	0	0	0	0	0	0	11
d__Bacteria	k__norank	p__Chlamydiae	c__Chlamydiae	o__Chlamydiales	f__Simkaniaceae	g__norank_f__Simkaniaceae	s__unclassified_g__norank_f__Simkaniaceae	OTU1656	0	0	0	0	0	0	0	0	0	0	0	0	0	0	0	0	0	0	0	1	4	0	0	1	0	0	0	0	0	0	0	0	0	0	0	0	0	0	6
d__Bacteria	k__norank	p__Firmicutes	c__Clostridia	o__Clostridiales	f__Ruminococcaceae	g__[Eubacterium]_coprostanoligenes_group	s__unclassified_g__[Eubacterium]_coprostanoligenes_group	OTU687	0	0	0	7	0	0	0	0	0	0	0	0	0	0	0	0	0	0	0	0	0	0	0	0	0	0	0	0	0	0	0	0	0	0	0	0	0	0	7
d__Bacteria	k__norank	p__Proteobacteria	c__Alphaproteobacteria	o__Rhizobiales	f__Hyphomicrobiaceae	g__Devosia	s__unclassified_g__Devosia	OTU59	7	0	0	2	0	0	1	1	0	0	1	0	0	0	0	0	0	0	0	0	0	0	0	0	0	0	0	0	0	0	0	0	1	0	0	0	0	0	13
d__Bacteria	k__norank	p__Proteobacteria	c__Gammaproteobacteria	o__Xanthomonadales	f__Xanthomonadales_Incertae_Sedis	g__Candidatus_Competibacter	s__uncultured_bacterium_g__Candidatus_Competibacter	OTU2020	0	6	0	0	0	2	0	4	0	0	0	0	0	0	0	0	0	0	0	0	1	1	1	0	0	0	0	0	4	6	1	0	2	0	0	0	0	0	28
d__Bacteria	k__norank	p__Fibrobacteres	c__Fibrobacteria	o__Fibrobacterales	f__Fibrobacteraceae	g__Fibrobacter	s__unclassified_g__Fibrobacter	OTU1201	0	0	0	0	0	7	0	0	0	0	0	0	0	0	0	0	0	0	0	0	0	0	0	0	0	0	0	0	0	0	0	0	0	0	0	0	0	0	7
d__Bacteria	k__norank	p__Proteobacteria	c__Betaproteobacteria	o__Neisseriales	f__Neisseriaceae	g__Stenoxybacter	s__uncultured_bacterium_g__Stenoxybacter	OTU1493	0	0	0	0	0	0	0	0	0	0	0	0	0	0	0	0	0	0	0	8	0	2	0	0	0	0	0	1	0	0	0	0	0	0	0	0	0	0	11
d__Bacteria	k__norank	p__Firmicutes	c__Clostridia	o__Clostridiales	f__Christensenellaceae	g__Christensenellaceae_R-7_group	s__unclassified_g__Christensenellaceae_R-7_group	OTU1250	0	0	0	7	0	1	0	0	0	0	0	0	0	0	0	0	0	0	0	0	0	0	0	0	0	0	0	0	0	0	0	0	0	0	0	0	0	0	8
d__Bacteria	k__norank	p__Firmicutes	c__Clostridia	o__Clostridiales	f__Lachnospiraceae	g__Lachnospiraceae_FCS020_group	s__uncultured_rumen_bacterium_g__Lachnospiraceae_FCS020_group	OTU1206	0	0	10	10	6	19	0	0	0	0	0	0	0	0	0	0	0	0	0	0	0	0	0	0	0	0	0	0	0	0	0	0	0	0	0	0	0	0	45
d__Bacteria	k__norank	p__Bacteroidetes	c__Bacteroidia	o__Bacteroidales	f__Prevotellaceae	g__Prevotella_1	s__unclassified_g__Prevotella_1	OTU1074	0	0	1	4	14	5	0	0	0	0	0	0	0	0	0	0	0	0	0	0	0	0	0	0	0	0	0	0	0	0	0	0	0	0	0	0	0	0	24
d__Bacteria	k__norank	p__Firmicutes	c__Clostridia	o__Clostridiales	f__Lachnospiraceae	g__Lachnospiraceae_AC2044_group	s__uncultured_bacterium_g__Lachnospiraceae_AC2044_group	OTU1302	0	0	0	0	0	0	6	6	0	0	0	0	0	0	0	0	0	0	0	0	0	0	0	0	0	0	0	0	0	0	0	0	0	0	0	0	0	0	12
d__Bacteria	k__norank	p__Proteobacteria	c__Betaproteobacteria	o__Burkholderiales	f__Comamonadaceae	g__unclassified_f__Comamonadaceae	s__unclassified_f__Comamonadaceae	OTU1244	6	1	0	0	0	7	2	0	0	0	0	0	0	1	0	0	0	0	0	0	0	0	0	0	0	0	0	0	0	0	0	0	0	0	0	0	0	0	17
d__Bacteria	k__norank	p__Verrucomicrobia	c__Verrucomicrobiae	o__Verrucomicrobiales	f__unclassified_o__Verrucomicrobiales	g__unclassified_o__Verrucomicrobiales	s__unclassified_o__Verrucomicrobiales	OTU1479	0	0	0	0	0	0	0	0	0	0	0	0	0	0	0	0	0	0	9	2	0	1	0	1	0	4	0	1	0	0	0	0	0	0	0	0	0	0	18
d__Bacteria	k__norank	p__Nitrospirae	c__Nitrospira	o__norank_c__Nitrospira	f__norank_c__Nitrospira	g__Nitrospira	s__uncultured_Nitrospira_sp._g__Nitrospira	OTU151	1	0	18	0	0	0	0	0	0	0	0	0	0	0	0	0	0	0	0	0	0	0	0	0	0	0	0	0	0	0	0	0	0	0	0	0	0	0	19
d__Bacteria	k__norank	p__Bacteroidetes	c__Flavobacteriia	o__Flavobacteriales	f__Flavobacteriaceae	g__Flavobacterium	s__unclassified_g__Flavobacterium	OTU599	0	0	16	0	0	0	0	0	0	0	0	0	0	0	0	0	0	0	0	0	0	0	0	0	0	0	0	0	0	0	0	0	0	0	0	0	0	0	16
d__Bacteria	k__norank	p__Actinobacteria	c__Actinobacteria	o__Micrococcales	f__unclassified_o__Micrococcales	g__unclassified_o__Micrococcales	s__unclassified_o__Micrococcales	OTU2109	0	0	0	0	0	0	0	2	0	0	0	0	0	0	0	0	0	0	0	0	0	0	0	0	0	0	0	0	0	0	0	0	22	0	0	0	0	0	24
d__Bacteria	k__norank	p__Fibrobacteres	c__Fibrobacteria	o__Fibrobacterales	f__possible_family_01	g__norank_f__possible_family_01	s__uncultured_bacterium_g__norank_f__possible_family_01	OTU421	0	0	10	0	0	0	0	0	0	0	0	0	0	0	0	0	0	0	0	0	0	0	0	0	0	0	0	0	0	0	0	0	0	0	0	0	0	0	10
d__Bacteria	k__norank	p__Bacteroidetes	c__Bacteroidia	o__Bacteroidales	f__Bacteroidales_S24-7_group	g__norank_f__Bacteroidales_S24-7_group	s__uncultured_bacterium_g__norank_f__Bacteroidales_S24-7_group	OTU350	0	0	15	0	0	0	0	0	0	0	0	0	0	1	0	0	0	1	0	0	0	0	0	0	0	0	0	0	0	0	0	0	0	0	0	0	0	0	17
d__Bacteria	k__norank	p__Nitrospirae	c__Nitrospira	o__norank_c__Nitrospira	f__norank_c__Nitrospira	g__Nitrospira	s__unclassified_g__Nitrospira	OTU471	0	0	32	0	0	0	0	0	0	0	0	0	0	0	0	0	0	0	0	0	3	0	0	0	0	0	0	1	0	0	0	0	0	0	0	0	0	0	36
d__Bacteria	k__norank	p__Acidobacteria	c__Acidobacteria	o__norank_c__Acidobacteria	f__norank_c__Acidobacteria	g__norank_c__Acidobacteria	s__uncultured_bacterium_92	OTU642	0	0	0	3	0	0	0	0	0	0	0	0	0	0	0	0	0	0	0	0	0	0	0	0	0	0	0	0	0	0	0	0	0	0	0	0	0	0	3
d__Bacteria	k__norank	p__Chloroflexi	c__Anaerolineae	o__Anaerolineales	f__Anaerolineaceae	g__unclassified_f__Anaerolineaceae	s__unclassified_f__Anaerolineaceae	OTU1670	0	0	0	0	0	0	0	0	0	0	0	0	0	0	0	0	0	0	0	1	8	0	7	0	0	0	0	0	0	0	0	0	0	0	0	0	0	0	16
d__Bacteria	k__norank	p__Chloroflexi	c__TK10	o__norank_c__TK10	f__norank_c__TK10	g__norank_c__TK10	s__unclassified_g__norank_c__TK10	OTU120	7	0	0	0	0	0	0	0	0	0	0	0	0	0	0	0	0	0	0	0	0	0	0	0	0	0	0	0	0	0	0	0	0	0	0	0	0	0	7
d__Bacteria	k__norank	p__TM6__Dependentiae_	c__norank_p__TM6__Dependentiae_	o__norank_p__TM6__Dependentiae_	f__norank_p__TM6__Dependentiae_	g__norank_p__TM6__Dependentiae_	s__uncultured_soil_bacterium_g__norank_p__TM6__Dependentiae_	OTU1722	0	0	0	0	0	0	0	0	0	0	0	0	0	0	0	0	0	0	0	2	8	1	1	1	0	1	1	0	0	0	0	0	0	0	0	0	0	0	15
d__Bacteria	k__norank	p__Actinobacteria	c__Actinobacteria	o__unclassified_c__Actinobacteria	f__unclassified_c__Actinobacteria	g__unclassified_c__Actinobacteria	s__unclassified_c__Actinobacteria	OTU573	0	0	12	0	0	0	0	0	0	0	0	0	0	0	0	0	0	0	0	0	0	0	0	0	0	0	0	0	0	0	0	0	0	0	0	0	0	0	12
d__Bacteria	k__norank	p__Gemmatimonadetes	c__Gemmatimonadetes	o__Gemmatimonadales	f__Gemmatimonadaceae	g__norank_f__Gemmatimonadaceae	s__unclassified_g__norank_f__Gemmatimonadaceae	OTU450	0	0	13	0	0	0	0	0	0	0	0	0	0	0	0	0	0	0	0	0	0	0	0	0	0	0	0	0	0	0	0	0	0	0	0	0	0	0	13
d__Bacteria	k__norank	p__Firmicutes	c__Bacilli	o__Lactobacillales	f__Streptococcaceae	g__Streptococcus	s__unclassified_g__Streptococcus	OTU2163	0	0	0	0	1	1	0	0	0	0	0	0	0	0	0	0	0	0	0	0	0	0	0	0	0	0	0	0	0	0	0	0	0	0	0	0	5	0	7
d__Bacteria	k__norank	p__Ignavibacteriae	c__Ignavibacteria	o__Ignavibacteriales	f__BSV26	g__norank_f__BSV26	s__unclassified_g__norank_f__BSV26	OTU13	11	0	8	0	0	0	0	0	0	0	0	0	0	0	0	0	0	0	0	0	0	0	0	0	0	0	0	0	0	0	0	0	0	0	0	0	0	0	19
d__Bacteria	k__norank	p__Firmicutes	c__Bacilli	o__Bacillales	f__Bacillaceae	g__Bacillus	s__unclassified_g__Bacillus	OTU1963	0	0	0	0	0	0	0	0	0	0	0	0	0	0	0	0	0	0	1	2	9	5	7	0	3	10	6	0	0	0	0	0	0	0	0	0	0	0	43
d__Bacteria	k__norank	p__Firmicutes	c__Clostridia	o__Clostridiales	f__Clostridiaceae_1	g__Clostridium_sensu_stricto_11	s__Clostridium_sp._DY2632	OTU1587	0	0	0	0	0	0	0	0	0	0	0	0	0	0	0	0	0	0	3	4	9	2	0	4	0	0	0	2	1	0	0	0	3	0	0	0	0	0	28
d__Bacteria	k__norank	p__Proteobacteria	c__Deltaproteobacteria	o__Myxococcales	f__Sandaracinaceae	g__norank_f__Sandaracinaceae	s__uncultured_bacterium_g__norank_f__Sandaracinaceae	OTU598	0	0	8	0	0	0	0	0	0	0	0	0	0	0	0	0	0	0	0	0	0	0	0	0	0	0	0	0	0	0	0	0	0	0	0	0	0	0	8
d__Bacteria	k__norank	p__Spirochaetae	c__Spirochaetes	o__Spirochaetales	f__Spirochaetaceae	g__Sphaerochaeta	s__uncultured_Spirochaeta_sp._g__Sphaerochaeta	OTU650	0	5	0	3	34	0	0	0	0	0	0	0	0	0	0	0	0	0	0	0	0	0	0	0	0	0	0	0	0	0	0	0	0	0	0	0	0	0	42
d__Bacteria	k__norank	p__Bacteroidetes	c__Bacteroidia	o__Bacteroidales	f__Bacteroidales_BS11_gut_group	g__norank_f__Bacteroidales_BS11_gut_group	s__uncultured_bacterium_g__norank_f__Bacteroidales_BS11_gut_group	OTU720	0	0	73	88	47	23	0	0	0	0	0	0	0	0	0	0	0	0	0	0	0	0	0	0	0	0	0	0	0	0	0	0	0	0	0	0	0	0	231
d__Bacteria	k__norank	p__Firmicutes	c__Clostridia	o__Clostridiales	f__Ruminococcaceae	g__Ruminococcaceae_UCG-005	s__unclassified_g__Ruminococcaceae_UCG-005	OTU1065	0	0	0	0	19	0	0	0	0	0	0	0	0	0	0	0	0	0	0	0	0	0	0	0	0	0	0	0	0	0	0	0	0	0	0	0	0	0	19
d__Bacteria	k__norank	p__Firmicutes	c__Clostridia	o__Clostridiales	f__Ruminococcaceae	g__Fastidiosipila	s__unclassified_g__Fastidiosipila	OTU27	22	0	0	0	0	0	0	0	0	0	0	0	0	0	0	0	0	0	0	0	0	0	1	0	0	0	0	0	0	0	0	0	0	0	0	0	0	0	23
d__Bacteria	k__norank	p__Proteobacteria	c__Gammaproteobacteria	o__Xanthomonadales	f__Xanthomonadales_Incertae_Sedis	g__Steroidobacter	s__unclassified_g__Steroidobacter	OTU412	0	0	10	0	0	0	0	0	0	0	0	0	0	0	0	0	0	0	0	0	0	0	0	0	0	0	0	0	0	0	0	0	0	0	0	0	0	0	10
d__Bacteria	k__norank	p__Firmicutes	c__Clostridia	o__Clostridiales	f__Lachnospiraceae	g__Lachnospiraceae_UCG-008	s__uncultured_rumen_bacterium_g__Lachnospiraceae_UCG-008	OTU1245	0	10	0	21	70	12	0	0	0	0	0	0	0	0	0	0	0	0	0	0	0	0	0	0	0	0	0	0	0	0	0	0	0	0	0	0	0	0	113
d__Bacteria	k__norank	p__Proteobacteria	c__Gammaproteobacteria	o__EC3	f__norank_o__EC3	g__norank_o__EC3	s__unclassified_g__norank_o__EC3	OTU1498	0	0	0	0	0	0	0	0	0	0	0	0	0	0	0	0	0	0	7	7	6	2	3	2	0	2	0	3	0	0	0	0	1	0	0	0	0	0	33
d__Bacteria	k__norank	p__Proteobacteria	c__Gammaproteobacteria	o__Xanthomonadales	f__norank_o__Xanthomonadales	g__norank_o__Xanthomonadales	s__uncultured_soil_bacterium_g__norank_o__Xanthomonadales	OTU1953	0	0	0	0	0	0	0	0	0	0	0	0	0	0	0	0	0	0	4	5	4	5	3	1	0	0	2	4	0	0	0	0	0	0	0	0	0	0	28
d__Bacteria	k__norank	p__Bacteroidetes	c__Bacteroidia	o__Bacteroidales	f__Porphyromonadaceae	g__Butyricimonas	s__Butyricimonas_virosa	OTU807	0	0	0	0	12	0	0	0	0	0	0	1	0	0	0	0	0	0	0	0	0	0	0	0	0	0	0	0	0	0	0	0	0	0	0	0	0	0	13
d__Bacteria	k__norank	p__Proteobacteria	c__Alphaproteobacteria	o__Rhizobiales	f__Rhizobiales_Incertae_Sedis	g__Nordella	s__uncultured_alpha_proteobacterium_g__Nordella	OTU308	4	0	5	0	0	0	0	0	0	0	0	0	0	0	0	0	0	0	0	0	0	0	0	0	0	0	0	0	0	0	0	0	0	0	0	0	0	0	9
d__Bacteria	k__norank	p__Bacteroidetes	c__Bacteroidia	o__Bacteroidales	f__Prevotellaceae	g__Prevotellaceae_UCG-001	s__uncultured_Bacteroidales_bacterium_g__Prevotellaceae_UCG-001	OTU117	13	1	251	36	23	5	0	0	0	0	0	0	0	0	0	1	1	0	0	0	0	0	0	0	0	0	0	0	0	0	0	0	0	0	0	1	0	0	332
d__Bacteria	k__norank	p__Firmicutes	c__Clostridia	o__Clostridiales	f__Ruminococcaceae	g__unclassified_f__Ruminococcaceae	s__unclassified_f__Ruminococcaceae	OTU1199	0	0	0	0	0	5	0	0	0	0	0	0	0	0	0	0	0	0	0	0	0	0	0	0	0	0	0	0	0	0	0	0	0	0	0	0	0	0	5
d__Bacteria	k__norank	p__Bacteroidetes	c__Bacteroidia	o__Bacteroidales	f__Rikenellaceae	g__Rikenellaceae_RC9_gut_group	s__uncultured_bacterium_g__Rikenellaceae_RC9_gut_group	OTU1178	0	0	14	8	44	28	0	0	0	0	0	0	0	0	0	0	0	0	0	0	0	0	0	0	0	0	0	0	0	0	0	0	0	0	0	0	0	0	94
d__Bacteria	k__norank	p__Bacteroidetes	c__Bacteroidia	o__Bacteroidales	f__Bacteroidales_BS11_gut_group	g__norank_f__Bacteroidales_BS11_gut_group	s__unclassified_g__norank_f__Bacteroidales_BS11_gut_group	OTU1078	0	0	24	0	94	46	0	0	0	0	0	0	0	0	0	0	0	0	0	0	0	0	0	0	0	0	0	0	0	0	0	0	0	0	0	0	0	0	164
d__Bacteria	k__norank	p__WS6	c__norank_p__WS6	o__norank_p__WS6	f__norank_p__WS6	g__norank_p__WS6	s__uncultured_bacterium_g__norank_p__WS6	OTU1016	0	0	0	0	19	0	0	0	0	0	0	0	0	0	0	0	0	0	0	0	0	0	0	0	0	0	0	0	0	0	0	0	0	0	0	0	0	0	19
d__Bacteria	k__norank	p__Proteobacteria	c__Alphaproteobacteria	o__Rhodospirillales	f__MSB-1E8	g__norank_f__MSB-1E8	s__unclassified_g__norank_f__MSB-1E8	OTU180	3	4	0	0	0	2	0	0	0	0	0	0	0	0	0	0	0	0	0	0	0	0	0	0	0	0	0	0	0	0	0	0	0	0	0	0	0	0	9
d__Bacteria	k__norank	p__Firmicutes	c__Clostridia	o__Clostridiales	f__Ruminococcaceae	g__[Eubacterium]_coprostanoligenes_group	s__unclassified_g__[Eubacterium]_coprostanoligenes_group	OTU364	0	0	24	14	28	10	0	0	0	0	0	0	0	0	0	0	0	0	0	0	0	0	0	0	0	0	0	0	0	0	0	0	0	0	0	0	0	0	76
d__Bacteria	k__norank	p__Chloroflexi	c__Anaerolineae	o__Anaerolineales	f__Anaerolineaceae	g__norank_f__Anaerolineaceae	s__uncultured_bacterium_g__norank_f__Anaerolineaceae	OTU206	0	8	0	0	0	0	0	0	0	0	0	0	0	0	0	0	0	0	0	0	0	0	0	0	0	0	0	0	0	0	0	0	0	0	0	0	0	0	8
d__Bacteria	k__norank	p__Proteobacteria	c__Deltaproteobacteria	o__Syntrophobacterales	f__Syntrophobacteraceae	g__Desulfovirga	s__uncultured_bacterium_g__Desulfovirga	OTU1688	0	0	0	0	0	0	0	0	0	0	0	0	0	0	0	0	0	0	8	7	11	2	1	2	0	2	0	0	0	0	0	0	0	0	0	0	0	0	33
d__Bacteria	k__norank	p__Cyanobacteria	c__Cyanobacteria	o__norank_c__Cyanobacteria	f__norank_c__Cyanobacteria	g__norank_c__Cyanobacteria	s__Chlorotetraedron_incus	OTU1569	0	0	0	0	0	0	0	0	0	0	0	0	0	0	0	0	0	0	5	5	1	0	0	0	1	2	2	3	0	1	0	0	0	0	0	0	0	0	20
d__Bacteria	k__norank	p__Proteobacteria	c__Deltaproteobacteria	o__Desulfurellales	f__Desulfurellaceae	g__H16	s__unclassified_g__H16	OTU571	0	0	14	0	0	0	0	0	0	0	0	0	0	0	0	0	0	0	0	0	0	0	0	0	0	0	0	0	0	0	0	0	0	0	0	0	0	0	14
d__Bacteria	k__norank	p__Chlamydiae	c__Chlamydiae	o__Chlamydiales	f__unclassified_o__Chlamydiales	g__unclassified_o__Chlamydiales	s__unclassified_o__Chlamydiales	OTU1689	0	0	0	0	0	0	0	0	0	0	0	0	0	0	0	0	0	0	1	1	12	0	0	0	0	0	0	1	0	0	0	0	0	0	0	0	0	0	15
d__Bacteria	k__norank	p__Firmicutes	c__Clostridia	o__Clostridiales	f__Ruminococcaceae	g__norank_f__Ruminococcaceae	s__Clostridium_sp._JC3	OTU1691	0	0	0	0	0	0	0	0	0	0	0	0	0	0	0	0	0	0	0	0	13	0	0	0	0	0	0	0	0	0	0	0	0	0	0	0	0	0	13
d__Bacteria	k__norank	p__Bacteroidetes	c__Sphingobacteriia	o__Sphingobacteriales	f__Sphingobacteriaceae	g__Sphingobacterium	s__unclassified_g__Sphingobacterium	OTU1368	0	0	0	0	0	0	0	0	0	7	28	0	0	0	0	0	0	0	0	0	0	0	0	0	0	0	0	0	0	0	0	0	0	0	0	0	0	0	35
d__Bacteria	k__norank	p__Chlamydiae	c__Chlamydiae	o__Chlamydiales	f__Parachlamydiaceae	g__unclassified_f__Parachlamydiaceae	s__unclassified_f__Parachlamydiaceae	OTU390	9	33	12	0	0	0	0	0	0	0	0	0	0	0	0	0	0	0	0	0	0	0	0	0	0	0	0	0	0	0	0	0	1	0	0	0	0	0	55
d__Bacteria	k__norank	p__Firmicutes	c__Clostridia	o__Clostridiales	f__Lachnospiraceae	g__Epulopiscium	s__uncultured_Gram-positive_bacterium_HOC39	OTU2008	0	0	0	0	0	0	0	0	0	0	0	0	0	0	0	0	0	0	2	0	2	0	0	13	11	2	5	1	0	0	0	0	0	0	0	0	0	0	36
d__Bacteria	k__norank	p__Chlamydiae	c__Chlamydiae	o__Chlamydiales	f__unclassified_o__Chlamydiales	g__unclassified_o__Chlamydiales	s__unclassified_o__Chlamydiales	OTU1683	0	0	0	0	0	0	0	0	0	0	0	0	0	0	0	0	0	0	1	0	3	1	0	0	1	0	0	0	0	0	0	0	0	0	0	0	0	0	6
d__Bacteria	k__norank	p__Firmicutes	c__Clostridia	o__Clostridiales	f__Ruminococcaceae	g__Faecalibacterium	s__unclassified_g__Faecalibacterium	OTU1274	0	2	0	0	2	0	21	4	0	0	4	6	0	0	0	0	0	0	0	0	0	0	0	0	0	0	0	0	0	0	1	1	0	0	0	1	2	0	44
d__Bacteria	k__norank	p__Saccharibacteria	c__norank_p__Saccharibacteria	o__norank_p__Saccharibacteria	f__norank_p__Saccharibacteria	g__norank_p__Saccharibacteria	s__uncultured_bacterium_g__norank_p__Saccharibacteria	OTU1607	0	0	0	0	0	0	0	3	0	0	0	0	0	0	0	0	0	0	1	0	2	0	6	0	2	0	2	0	0	0	0	0	0	0	0	0	0	0	16
d__Bacteria	k__norank	p__Proteobacteria	c__Betaproteobacteria	o__Neisseriales	f__Neisseriaceae	g__Chitinibacter	s__Chitinibacter_sp._STM-7	OTU1725	0	0	0	0	0	0	0	0	0	0	0	0	0	0	0	0	0	0	0	32	3	29	12	0	16	9	18	0	2	0	0	0	0	0	0	0	0	0	121
d__Bacteria	k__norank	p__Firmicutes	c__Clostridia	o__Clostridiales	f__Clostridiaceae_1	g__Clostridium_sensu_stricto_1	s__unclassified_g__Clostridium_sensu_stricto_1	OTU1423	0	0	0	0	0	0	0	0	0	0	0	56	0	0	0	0	10	34	0	0	0	0	0	0	0	0	0	0	2	0	0	3	0	0	0	0	0	0	105
d__Bacteria	k__norank	p__Bacteroidetes	c__Bacteroidia	o__Bacteroidales	f__Bacteroidales_BS11_gut_group	g__norank_f__Bacteroidales_BS11_gut_group	s__unclassified_g__norank_f__Bacteroidales_BS11_gut_group	OTU665	0	0	2	14	4	3	0	0	0	0	0	0	0	0	0	0	0	0	0	0	0	0	0	0	0	0	0	0	0	0	0	0	0	0	0	0	0	0	23
d__Bacteria	k__norank	p__Firmicutes	c__Clostridia	o__Clostridiales	f__Lachnospiraceae	g__Roseburia	s__unclassified_g__Roseburia	OTU75	14	0	0	0	0	2	0	0	0	0	0	0	0	0	0	0	0	0	0	0	0	0	0	0	0	0	0	0	0	0	0	0	0	0	0	0	4	0	20
d__Bacteria	k__norank	p__Firmicutes	c__Clostridia	o__Clostridiales	f__Ruminococcaceae	g__Saccharofermentans	s__unclassified_g__Saccharofermentans	OTU401	0	0	37	3	76	26	0	0	0	0	0	0	0	0	0	0	0	0	0	0	0	0	0	0	0	0	0	0	0	0	0	0	0	0	0	0	0	0	142
d__Bacteria	k__norank	p__Proteobacteria	c__Deltaproteobacteria	o__Desulfuromonadales	f__Geobacteraceae	g__Geobacter	s__uncultured_Desulfuromonadales_bacterium_g__Geobacter	OTU625	0	0	29	0	0	0	0	0	0	1	0	0	0	0	0	0	0	0	0	0	0	0	0	0	0	0	0	0	0	0	0	0	0	0	0	0	0	0	30
d__Bacteria	k__norank	p__Actinobacteria	c__Actinobacteria	o__Propionibacteriales	f__Nocardioidaceae	g__Marmoricola	s__uncultured_bacterium_g__Marmoricola	OTU372	4	0	23	0	0	1	1	1	0	0	0	0	0	0	0	0	0	0	0	2	0	3	0	1	0	1	0	0	1	3	0	1	12	0	0	0	0	0	54
d__Bacteria	k__norank	p__Proteobacteria	c__Deltaproteobacteria	o__Oligoflexales	f__Oligoflexaceae	g__norank_f__Oligoflexaceae	s__uncultured_marine_bacterium_g__norank_f__Oligoflexaceae	OTU1962	0	0	0	0	0	0	0	0	0	0	0	0	0	0	0	0	0	0	19	21	14	7	14	7	3	7	5	7	0	0	0	0	0	0	0	0	0	0	104
d__Bacteria	k__norank	p__Acidobacteria	c__Acidobacteria	o__Solibacterales	f__Solibacteraceae__Subgroup_3_	g__unclassified_f__Solibacteraceae__Subgroup_3_	s__unclassified_f__Solibacteraceae__Subgroup_3_	OTU92	21	0	0	0	0	0	0	0	0	0	0	0	0	0	0	0	0	0	0	0	0	0	0	0	0	0	0	0	0	0	0	0	0	0	0	0	0	0	21
d__Bacteria	k__norank	p__Firmicutes	c__Clostridia	o__Clostridiales	f__Christensenellaceae	g__Christensenellaceae_R-7_group	s__bacterium_enrichment_culture_clone_DPF35	OTU282	0	0	22	0	0	0	1	0	0	0	0	0	0	0	0	0	0	0	0	0	2	0	0	0	0	1	0	0	0	0	0	0	0	0	0	0	0	0	26
d__Bacteria	k__norank	p__Chloroflexi	c__Anaerolineae	o__Anaerolineales	f__Anaerolineaceae	g__norank_f__Anaerolineaceae	s__unclassified_g__norank_f__Anaerolineaceae	OTU424	0	0	18	0	0	0	0	0	0	0	0	0	0	0	0	0	0	0	0	0	0	0	0	0	0	0	0	0	0	0	0	0	0	0	0	0	0	0	18
d__Bacteria	k__norank	p__Firmicutes	c__Erysipelotrichia	o__Erysipelotrichales	f__Erysipelotrichaceae	g__Erysipelotrichaceae_UCG-004	s__unclassified_g__Erysipelotrichaceae_UCG-004	OTU242	0	9	0	0	0	0	0	0	0	0	0	0	0	0	0	0	0	0	0	0	0	0	0	0	0	0	0	0	0	0	0	0	0	0	0	0	0	0	9
d__Bacteria	k__norank	p__Tenericutes	c__Mollicutes	o__NB1-n	f__norank_o__NB1-n	g__norank_o__NB1-n	s__unidentified_rumen_bacterium_RF3	OTU435	0	0	40	0	11	0	0	0	0	0	0	0	0	0	0	0	0	0	0	0	0	0	0	0	0	0	0	0	0	0	0	0	0	0	0	0	0	0	51
d__Bacteria	k__norank	p__Bacteroidetes	c__Bacteroidia	o__Bacteroidales	f__Prevotellaceae	g__Alloprevotella	s__uncultured_rumen_bacterium_g__Alloprevotella	OTU1106	0	0	0	0	5	14	0	0	0	0	0	0	0	0	0	0	0	0	0	0	0	0	0	0	0	0	0	0	0	0	0	0	0	0	0	0	0	0	19
d__Bacteria	k__norank	p__Firmicutes	c__Bacilli	o__Bacillales	f__Bacillaceae	g__Bacillus	s__Bacillus_smithii	OTU1373	0	0	0	0	0	0	0	0	0	6	4	1	0	0	0	0	0	0	0	0	0	0	1	0	0	0	0	0	0	0	0	0	0	0	0	0	1	0	13
d__Bacteria	k__norank	p__Proteobacteria	c__Alphaproteobacteria	o__Rhizobiales	f__Hyphomicrobiaceae	g__Hyphomicrobium	s__unclassified_g__Hyphomicrobium	OTU1339	0	0	0	0	0	0	0	3	0	0	0	0	0	0	0	0	0	0	0	1	1	0	1	0	0	1	0	0	0	0	0	0	4	0	0	0	0	0	11
d__Bacteria	k__norank	p__Gemmatimonadetes	c__Gemmatimonadetes	o__Gemmatimonadales	f__Gemmatimonadaceae	g__norank_f__Gemmatimonadaceae	s__unclassified_g__norank_f__Gemmatimonadaceae	OTU276	1	2	25	0	0	0	0	0	0	0	0	0	0	0	0	0	0	0	0	0	0	0	0	0	0	0	0	0	0	0	0	0	0	0	0	0	0	0	28
d__Bacteria	k__norank	p__Bacteroidetes	c__Bacteroidia	o__Bacteroidales	f__Porphyromonadaceae	g__norank_f__Porphyromonadaceae	s__Porphyromonadaceae_bacterium_COT-184_OH4590	OTU658	0	0	0	17	0	0	0	0	0	0	0	0	0	0	0	0	0	0	0	0	0	0	0	0	0	0	0	0	0	0	0	0	0	0	0	0	0	0	17
d__Bacteria	k__norank	p__Actinobacteria	c__Actinobacteria	o__norank_c__Actinobacteria	f__norank_c__Actinobacteria	g__norank_c__Actinobacteria	s__uncultured_bacterium_g__norank_c__Actinobacteria	OTU1614	0	0	0	0	0	0	0	0	0	0	0	0	0	0	0	0	0	0	10	12	7	0	1	1	1	3	1	0	0	0	0	0	0	0	0	0	0	0	36
d__Bacteria	k__norank	p__Firmicutes	c__Clostridia	o__Clostridiales	f__Family_XIII	g__norank_f__Family_XIII	s__uncultured_bacterium_g__norank_f__Family_XIII	OTU1335	0	1	0	6	4	2	0	4	0	0	0	0	1	1	0	0	0	0	1	1	0	2	2	0	0	0	0	0	2	5	1	0	9	0	0	0	0	0	42
d__Bacteria	k__norank	p__Firmicutes	c__Clostridia	o__Clostridiales	f__Ruminococcaceae	g__unclassified_f__Ruminococcaceae	s__unclassified_f__Ruminococcaceae	OTU318	0	0	16	0	14	0	0	0	0	0	0	0	0	0	0	0	0	0	0	0	0	0	0	0	0	0	0	0	0	0	0	0	0	0	0	0	0	0	30
d__Bacteria	k__norank	p__Firmicutes	c__Clostridia	o__Clostridiales	f__Lachnospiraceae	g__Lachnospiraceae_FCS020_group	s__uncultured_rumen_bacterium_g__Lachnospiraceae_FCS020_group	OTU586	0	0	18	0	0	8	0	1	0	0	1	0	0	0	0	0	0	0	0	0	0	0	0	0	0	0	0	0	0	0	0	0	0	0	0	0	0	0	28
d__Bacteria	k__norank	p__Proteobacteria	c__Alphaproteobacteria	o__Rhodobacterales	f__Rhodobacteraceae	g__Rhodobacter	s__unclassified_g__Rhodobacter	OTU1860	2	1	0	2	0	0	2	1	0	1	0	0	0	6	0	0	0	0	18	43	26	33	23	13	3	6	4	12	13	34	0	3	150	0	0	0	0	0	396
d__Bacteria	k__norank	p__Proteobacteria	c__Betaproteobacteria	o__Nitrosomonadales	f__Nitrosomonadaceae	g__norank_f__Nitrosomonadaceae	s__unclassified_g__norank_f__Nitrosomonadaceae	OTU659	0	0	0	12	0	0	0	0	0	0	0	0	0	0	0	0	0	0	0	0	0	0	0	0	0	0	0	0	0	0	0	0	0	0	0	0	0	0	12
d__Bacteria	k__norank	p__Actinobacteria	c__Actinobacteria	o__Micromonosporales	f__Micromonosporaceae	g__unclassified_f__Micromonosporaceae	s__unclassified_f__Micromonosporaceae	OTU144	6	0	0	0	0	0	0	0	0	0	0	0	0	0	0	0	0	0	0	0	0	0	0	0	0	0	0	0	0	0	0	0	0	0	0	0	0	0	6
d__Bacteria	k__norank	p__Firmicutes	c__Clostridia	o__Clostridiales	f__Lachnospiraceae	g__Lachnoclostridium_10	s__uncultured_rumen_bacterium_g__Lachnoclostridium_10	OTU393	0	0	17	0	0	0	0	0	0	0	0	0	0	0	0	0	0	0	0	0	0	0	0	0	0	0	0	0	0	0	0	0	0	0	0	0	0	0	17
d__Bacteria	k__norank	p__Chloroflexi	c__SJA-15	o__norank_c__SJA-15	f__norank_c__SJA-15	g__norank_c__SJA-15	s__unclassified_g__norank_c__SJA-15	OTU1806	0	0	0	0	0	0	0	0	0	0	0	0	0	0	0	0	0	0	11	17	17	10	11	4	2	3	2	7	0	0	0	0	1	0	0	0	0	0	85
d__Bacteria	k__norank	p__Nitrospirae	c__Nitrospira	o__norank_c__Nitrospira	f__norank_c__Nitrospira	g__Nitrospira	s__unclassified_g__Nitrospira	OTU1271	0	0	7	0	0	0	7	0	0	1	0	0	0	0	0	0	0	0	0	0	0	0	0	0	0	0	0	0	0	0	0	0	2	0	0	0	0	0	17
d__Bacteria	k__norank	p__Proteobacteria	c__Alphaproteobacteria	o__Rhizobiales	f__Methylocystaceae	g__unclassified_f__Methylocystaceae	s__unclassified_f__Methylocystaceae	OTU1940	1	2	0	7	0	0	0	9	0	0	0	0	0	2	0	0	0	0	229	314	505	289	200	109	31	127	65	102	3	3	0	3	48	0	0	0	0	0	2049
d__Bacteria	k__norank	p__Bacteroidetes	c__Sphingobacteriia	o__Sphingobacteriales	f__Chitinophagaceae	g__unclassified_f__Chitinophagaceae	s__unclassified_f__Chitinophagaceae	OTU1858	0	0	0	0	0	0	0	0	0	0	0	0	0	0	0	0	0	0	0	2	0	4	1	1	2	0	1	0	0	0	0	0	0	0	0	0	0	0	11
d__Bacteria	k__norank	p__Bacteroidetes	c__Bacteroidia	o__Bacteroidales	f__Bacteroidales_BS11_gut_group	g__norank_f__Bacteroidales_BS11_gut_group	s__uncultured_rumen_bacterium_g__norank_f__Bacteroidales_BS11_gut_group	OTU185	0	13	15	18	8	27	0	0	0	0	0	0	0	0	0	0	0	0	0	0	0	0	0	0	0	0	0	0	0	0	0	0	0	0	0	0	0	0	81
d__Bacteria	k__norank	p__Cyanobacteria	c__Cyanobacteria	o__norank_c__Cyanobacteria	f__norank_c__Cyanobacteria	g__norank_c__Cyanobacteria	s__unclassified_g__norank_c__Cyanobacteria	OTU1427	0	0	0	0	0	0	0	0	0	0	0	0	0	0	0	0	0	0	176	88	126	63	41	84	16	34	11	22	0	0	0	0	0	0	0	0	0	0	661
d__Bacteria	k__norank	p__Actinobacteria	c__Actinobacteria	o__Corynebacteriales	f__Mycobacteriaceae	g__Mycobacterium	s__unclassified_g__Mycobacterium	OTU1625	5	11	1	0	0	0	36	7	0	1	6	0	0	1	0	0	0	0	71	81	82	56	61	32	25	19	19	14	4	4	0	1	32	0	0	0	0	0	569
d__Bacteria	k__norank	p__Actinobacteria	c__Actinobacteria	o__Corynebacteriales	f__Corynebacteriaceae	g__Lawsonella	s__unclassified_g__Lawsonella	OTU1809	0	0	0	0	0	0	0	0	0	0	0	0	0	0	0	0	0	0	0	0	0	0	9	0	0	0	0	0	0	0	0	0	0	0	0	0	0	0	9
d__Bacteria	k__norank	p__Firmicutes	c__Clostridia	o__Clostridiales	f__Family_XIII	g__[Eubacterium]_nodatum_group	s__unclassified_g__[Eubacterium]_nodatum_group	OTU698	0	0	0	11	6	0	0	0	0	0	0	0	0	0	0	0	0	0	0	0	0	0	0	0	0	0	0	0	0	0	0	0	0	0	0	0	0	0	17
d__Bacteria	k__norank	p__Firmicutes	c__Clostridia	o__Clostridiales	f__Ruminococcaceae	g__Caproiciproducens	s__uncultured_bacterium_g__Caproiciproducens	OTU423	0	0	24	0	0	0	0	0	0	0	0	0	0	0	0	0	0	0	0	0	0	0	0	0	0	0	0	0	0	0	0	0	0	0	0	0	0	0	24
d__Bacteria	k__norank	p__Proteobacteria	c__Alphaproteobacteria	o__Rhizobiales	f__unclassified_o__Rhizobiales	g__unclassified_o__Rhizobiales	s__unclassified_o__Rhizobiales	OTU2130	0	0	0	0	0	0	4	0	0	0	0	0	0	0	0	0	0	0	0	0	0	0	0	0	0	0	0	0	1	1	0	0	18	0	0	0	0	0	24
d__Bacteria	k__norank	p__Gemmatimonadetes	c__Gemmatimonadetes	o__Gemmatimonadales	f__Gemmatimonadaceae	g__norank_f__Gemmatimonadaceae	s__unclassified_g__norank_f__Gemmatimonadaceae	OTU900	0	0	0	0	27	0	0	0	0	0	0	0	0	0	0	0	0	0	0	0	0	0	0	0	0	0	0	0	0	0	0	0	0	0	0	0	0	0	27
d__Bacteria	k__norank	p__Proteobacteria	c__Alphaproteobacteria	o__Rhodospirillales	f__I-10	g__norank_f__I-10	s__uncultured_bacterium_g__norank_f__I-10	OTU1517	1	0	0	0	0	0	0	5	0	0	0	0	0	0	0	0	0	0	4	6	0	5	0	2	0	0	3	3	0	0	0	0	0	0	0	0	0	0	29
d__Bacteria	k__norank	p__Bacteroidetes	c__Bacteroidia	o__Bacteroidales	f__Rikenellaceae	g__Rikenellaceae_RC9_gut_group	s__uncultured_bacterium_g__Rikenellaceae_RC9_gut_group	OTU706	0	23	23	34	17	6	0	0	0	0	0	0	0	0	0	0	0	0	0	0	0	0	0	0	0	0	0	0	0	0	0	0	0	0	0	0	0	0	103
d__Bacteria	k__norank	p__Proteobacteria	c__Alphaproteobacteria	o__Rhodospirillales	f__Acetobacteraceae	g__Rubritepida	s__uncultured_bacterium_g__Rubritepida	OTU2013	0	0	0	0	0	0	0	0	0	0	0	0	0	0	0	0	0	0	0	0	0	0	0	0	0	0	0	0	11	0	0	0	2	0	0	0	0	0	13
d__Bacteria	k__norank	p__Spirochaetae	c__Spirochaetes	o__Spirochaetales	f__Spirochaetaceae	g__Treponema	s__uncultured_prokaryote_g__Treponema	OTU351	0	0	4	0	0	0	0	0	0	0	0	0	0	0	0	0	0	0	0	0	0	0	0	0	0	0	0	0	0	0	0	0	0	0	0	0	0	0	4
d__Bacteria	k__norank	p__Proteobacteria	c__Gammaproteobacteria	o__Enterobacteriales	f__Enterobacteriaceae	g__Escherichia-Shigella	s__unclassified_g__Escherichia-Shigella	OTU1386	9	13	6	21	14	13	25	5	0	0	2	0	0	0	1	0	0	0	0	0	0	0	1	0	0	0	0	0	1	0	0	0	0	0	1	1	6	0	119
d__Bacteria	k__norank	p__Saccharibacteria	c__norank_p__Saccharibacteria	o__norank_p__Saccharibacteria	f__norank_p__Saccharibacteria	g__norank_p__Saccharibacteria	s__uncultured_candidate_division_WS5_bacterium	OTU1606	0	0	0	0	0	0	0	0	0	0	0	0	0	0	0	0	0	0	2	10	6	3	9	3	1	0	1	2	0	0	0	0	0	0	0	0	0	0	37
d__Bacteria	k__norank	p__Bacteroidetes	c__Bacteroidia	o__Bacteroidales	f__Prevotellaceae	g__Prevotella_1	s__uncultured_bacterium_g__Prevotella_1	OTU1182	0	0	5	13	1	38	0	0	0	0	0	0	0	0	0	0	0	0	0	0	0	0	0	0	0	0	0	0	0	0	0	0	0	0	0	0	0	0	57
d__Bacteria	k__norank	p__Verrucomicrobia	c__Spartobacteria	o__Chthoniobacterales	f__Chthoniobacteraceae	g__Chthoniobacter	s__uncultured_Verrucomicrobia_bacterium_g__Chthoniobacter	OTU1529	0	0	0	0	0	0	0	0	0	0	0	0	0	0	0	0	0	0	25	20	14	3	7	6	0	1	0	1	0	0	0	0	13	0	0	0	0	0	90
d__Bacteria	k__norank	p__Proteobacteria	c__Betaproteobacteria	o__Burkholderiales	f__Burkholderiaceae	g__Burkholderia-Paraburkholderia	s__unclassified_g__Burkholderia-Paraburkholderia	OTU1071	11	19	3	4	3	5	21	5	1	18	5	0	1	2	0	0	0	0	1	2	77	1	46	1	1	3	0	0	1	5	0	1	28	0	6	0	25	2	298
d__Bacteria	k__norank	p__Verrucomicrobia	c__Verrucomicrobiae	o__Verrucomicrobiales	f__Verrucomicrobiaceae	g__norank_f__Verrucomicrobiaceae	s__uncultured_bacterium_g__norank_f__Verrucomicrobiaceae	OTU1424	0	0	0	0	0	0	0	0	0	0	0	0	0	0	0	0	0	0	5	11	0	3	0	1	1	1	0	0	0	0	0	0	0	0	0	0	0	0	22
d__Bacteria	k__norank	p__Actinobacteria	c__Actinobacteria	o__PeM15	f__norank_o__PeM15	g__norank_o__PeM15	s__unclassified_g__norank_o__PeM15	OTU1824	1	0	0	0	0	1	0	1	0	1	1	0	0	0	0	0	0	0	10	15	14	9	12	2	3	5	5	3	0	2	0	0	6	0	0	0	0	0	91
d__Bacteria	k__norank	p__Acidobacteria	c__Acidobacteria	o__Solibacterales	f__Solibacteraceae__Subgroup_3_	g__Candidatus_Solibacter	s__unclassified_g__Candidatus_Solibacter	OTU25	17	0	0	3	0	0	0	0	0	0	0	0	0	0	0	0	0	0	0	0	0	0	0	0	0	0	0	0	0	0	0	0	0	0	0	0	0	0	20
d__Bacteria	k__norank	p__Proteobacteria	c__Betaproteobacteria	o__Neisseriales	f__Neisseriaceae	g__unclassified_f__Neisseriaceae	s__unclassified_f__Neisseriaceae	OTU1079	0	11	0	28	41	164	0	0	0	0	0	0	0	0	0	0	0	0	0	0	0	0	0	0	0	0	0	0	0	0	0	0	0	0	0	0	0	0	244
d__Bacteria	k__norank	p__Actinobacteria	c__Actinobacteria	o__Actinomycetales	f__Actinomycetaceae	g__unclassified_f__Actinomycetaceae	s__unclassified_f__Actinomycetaceae	OTU1193	0	0	0	0	0	4	0	0	0	0	0	0	0	0	0	0	0	0	0	0	0	0	0	0	0	0	0	0	0	0	0	0	0	0	0	0	0	0	4
d__Bacteria	k__norank	p__Proteobacteria	c__Alphaproteobacteria	o__Rhizobiales	f__Hyphomicrobiaceae	g__Hyphomicrobium	s__uncultured_bacterium_g__Hyphomicrobium	OTU1581	0	0	0	0	0	0	0	0	0	0	0	0	0	1	0	0	0	0	4	4	7	3	5	2	0	0	0	3	0	0	0	0	0	0	0	0	0	0	29
d__Bacteria	k__norank	p__Firmicutes	c__Clostridia	o__Clostridiales	f__Lachnospiraceae	g__Lachnospiraceae_UCG-008	s__uncultured_Lachnospiraceae_bacterium_g__Lachnospiraceae_UCG-008	OTU957	0	0	0	0	10	10	0	0	0	0	0	0	0	0	0	0	0	0	0	0	0	0	0	0	0	0	0	0	0	0	0	0	0	0	0	0	0	0	20
d__Bacteria	k__norank	p__Actinobacteria	c__Actinobacteria	o__Propionibacteriales	f__Propionibacteriaceae	g__unclassified_f__Propionibacteriaceae	s__unclassified_f__Propionibacteriaceae	OTU1433	0	0	0	0	0	0	0	0	0	0	0	0	0	0	0	0	0	0	9	19	3	3	4	4	4	2	2	3	0	0	0	0	0	0	0	0	0	0	53
d__Bacteria	k__norank	p__Firmicutes	c__Clostridia	o__Clostridiales	f__Ruminococcaceae	g__unclassified_f__Ruminococcaceae	s__unclassified_f__Ruminococcaceae	OTU172	0	13	0	0	0	0	0	0	0	0	0	0	0	0	0	0	0	0	0	0	0	0	0	0	0	0	0	0	0	0	0	0	0	0	0	0	0	0	13
d__Bacteria	k__norank	p__Verrucomicrobia	c__WCHB1-41	o__norank_c__WCHB1-41	f__norank_c__WCHB1-41	g__norank_c__WCHB1-41	s__uncultured_rumen_bacterium_g__norank_c__WCHB1-41	OTU166	0	24	26	3	10	4	0	0	0	0	0	0	0	0	0	0	0	0	0	0	0	0	0	0	0	0	0	0	0	0	0	0	0	0	0	0	0	0	67
d__Bacteria	k__norank	p__Cyanobacteria	c__Cyanobacteria	o__Gastranaerophilales	f__norank_o__Gastranaerophilales	g__norank_o__Gastranaerophilales	s__uncultured_rumen_bacterium_g__norank_o__Gastranaerophilales	OTU856	0	0	0	0	26	0	0	0	0	0	0	0	0	0	0	0	0	0	0	0	0	0	0	0	0	0	0	0	0	0	0	0	0	0	0	0	0	0	26
d__Bacteria	k__norank	p__Firmicutes	c__Clostridia	o__Clostridiales	f__Lachnospiraceae	g__unclassified_f__Lachnospiraceae	s__unclassified_f__Lachnospiraceae	OTU835	0	0	1	1	6	4	0	0	0	0	0	0	0	0	0	0	0	0	0	0	0	0	0	0	0	0	0	0	0	0	0	0	2	0	0	0	0	0	14
d__Bacteria	k__norank	p__Bacteroidetes	c__Sphingobacteriia	o__Sphingobacteriales	f__NS11-12_marine_group	g__norank_f__NS11-12_marine_group	s__uncultured_Bacteroidetes_bacterium_g__norank_f__NS11-12_marine_group	OTU217	0	15	0	0	0	0	0	0	0	0	0	0	0	0	0	0	0	0	0	0	0	0	0	0	0	0	0	0	0	0	0	0	0	0	0	0	0	0	15
d__Bacteria	k__norank	p__Firmicutes	c__Clostridia	o__Clostridiales	f__Ruminococcaceae	g__Ruminococcaceae_UCG-010	s__uncultured_bacterium_g__Ruminococcaceae_UCG-010	OTU1225	0	0	0	1	0	5	0	0	0	0	0	0	0	0	0	0	0	0	0	0	0	0	0	0	0	0	0	0	0	0	0	0	0	0	0	0	0	0	6
d__Bacteria	k__norank	p__Tenericutes	c__Mollicutes	o__Mycoplasmatales	f__Mycoplasmataceae	g__Mycoplasma	s__Mycoplasma_orale	OTU996	0	0	0	0	19	0	0	0	0	0	0	0	0	0	0	0	0	0	0	0	0	0	0	0	0	0	0	0	0	0	0	0	0	0	0	0	0	0	19
d__Bacteria	k__norank	p__Bacteroidetes	c__Bacteroidia	o__Bacteroidales	f__Bacteroidales_S24-7_group	g__norank_f__Bacteroidales_S24-7_group	s__uncultured_bacterium_g__norank_f__Bacteroidales_S24-7_group	OTU183	0	31	0	0	0	0	0	0	0	0	0	0	0	0	0	0	0	0	0	0	0	0	0	0	0	0	0	0	0	0	0	0	0	0	0	0	0	0	31
d__Bacteria	k__norank	p__Firmicutes	c__Negativicutes	o__Selenomonadales	f__Acidaminococcaceae	g__Succiniclasticum	s__uncultured_rumen_bacterium_g__Succiniclasticum	OTU944	0	7	22	6	37	45	0	0	0	0	0	0	0	0	0	0	0	0	0	0	0	0	0	0	0	0	0	0	0	0	0	0	0	0	0	0	0	0	117
d__Bacteria	k__norank	p__Firmicutes	c__Bacilli	o__Bacillales	f__Bacillaceae	g__Bacillus	s__unclassified_g__Bacillus	OTU228	0	28	0	0	6	0	0	7	1	1	0	0	0	0	0	0	0	0	0	3	2	3	0	0	0	4	0	0	0	1	0	0	4	0	0	0	1	0	61
d__Bacteria	k__norank	p__Bacteroidetes	c__Bacteroidetes_Incertae_Sedis	o__Order_II	f__Rhodothermaceae	g__Rubrivirga	s__uncultured_bacterium_g__Rubrivirga	OTU278	0	0	12	0	0	0	0	0	0	0	0	0	0	0	0	0	0	0	0	0	0	0	0	0	0	0	0	0	0	0	0	0	0	0	0	0	0	0	12
d__Bacteria	k__norank	p__Chloroflexi	c__SJA-68	o__norank_c__SJA-68	f__norank_c__SJA-68	g__norank_c__SJA-68	s__unclassified_g__norank_c__SJA-68	OTU1646	0	0	0	0	0	0	0	0	0	0	0	0	0	0	0	0	0	0	2	0	7	0	4	0	0	0	0	0	0	0	0	0	0	0	0	0	0	0	13
d__Bacteria	k__norank	p__Bacteroidetes	c__Bacteroidia	o__Bacteroidales	f__Prevotellaceae	g__Prevotellaceae_NK3B31_group	s__uncultured_rumen_bacterium_g__Prevotellaceae_NK3B31_group	OTU1093	0	5	0	11	14	12	0	0	0	0	0	0	0	0	0	0	0	0	0	0	0	0	0	0	0	0	0	0	0	0	0	0	0	0	0	0	0	0	42
d__Bacteria	k__norank	p__Firmicutes	c__Clostridia	o__Clostridiales	f__Ruminococcaceae	g__unclassified_f__Ruminococcaceae	s__unclassified_f__Ruminococcaceae	OTU1217	0	0	0	23	27	13	0	0	0	0	0	0	0	0	0	0	0	0	0	0	0	0	0	0	0	0	0	0	0	0	0	0	0	0	0	0	0	0	63
d__Bacteria	k__norank	p__Tenericutes	c__Mollicutes	o__Mollicutes_RF9	f__norank_o__Mollicutes_RF9	g__norank_o__Mollicutes_RF9	s__uncultured_rumen_bacterium_g__norank_o__Mollicutes_RF9	OTU473	0	0	4	0	0	0	0	0	0	0	0	0	0	0	0	0	0	0	0	0	0	0	0	0	0	0	0	0	0	0	0	0	0	0	0	0	0	0	4
d__Bacteria	k__norank	p__Firmicutes	c__Clostridia	o__Clostridiales	f__Christensenellaceae	g__Catabacter	s__Christensenella_sp._Marseille-P2437	OTU1220	0	0	0	0	0	10	0	0	0	0	0	0	0	0	0	0	0	0	0	0	0	0	0	0	0	0	0	0	0	0	0	0	0	0	0	0	0	0	10
d__Bacteria	k__norank	p__Actinobacteria	c__Actinobacteria	o__Acidimicrobiales	f__norank_o__Acidimicrobiales	g__norank_o__Acidimicrobiales	s__unclassified_g__norank_o__Acidimicrobiales	OTU1792	0	0	0	0	0	0	0	0	0	0	0	0	0	0	0	0	0	0	0	1	4	0	6	0	0	2	0	2	0	0	0	0	0	0	0	0	0	0	15
d__Bacteria	k__norank	p__Proteobacteria	c__Deltaproteobacteria	o__Deltaproteobacteria_Incertae_Sedis	f__Syntrophorhabdaceae	g__Syntrophorhabdus	s__uncultured_bacterium_g__Syntrophorhabdus	OTU1765	0	0	0	0	0	0	0	0	0	0	0	0	0	0	0	0	0	0	10	3	5	8	3	2	0	1	2	8	0	0	0	0	0	0	0	0	0	0	42
d__Bacteria	k__norank	p__Proteobacteria	c__Alphaproteobacteria	o__Rhizobiales	f__Methylobacteriaceae	g__Methylobacterium	s__unclassified_g__Methylobacterium	OTU1295	0	0	0	0	1	0	29	1	0	0	0	0	1	0	0	0	0	0	1	2	2	2	1	0	0	0	1	0	0	0	0	0	0	0	0	0	0	0	41
d__Bacteria	k__norank	p__Firmicutes	c__Clostridia	o__Clostridiales	f__Ruminococcaceae	g__Ruminococcaceae_UCG-014	s__unclassified_g__Ruminococcaceae_UCG-014	OTU928	0	0	6	0	1	0	0	0	0	0	0	0	0	0	0	0	0	0	0	0	0	0	0	0	0	0	0	0	0	0	0	0	0	0	0	0	0	0	7
d__Bacteria	k__norank	p__Proteobacteria	c__Alphaproteobacteria	o__Rhizobiales	f__Methylobacteriaceae	g__Methylobacterium	s__Methylobacterium_adhaesivum_g__Methylobacterium	OTU1260	0	0	2	0	4	0	148	0	0	0	0	0	0	0	0	0	0	0	0	0	0	2	0	0	0	0	1	1	0	0	0	0	0	0	0	0	0	0	158
d__Bacteria	k__norank	p__Bacteroidetes	c__Bacteroidetes_Incertae_Sedis	o__Order_III	f__norank_o__Order_III	g__norank_o__Order_III	s__unclassified_g__norank_o__Order_III	OTU891	0	0	0	0	25	0	0	0	0	0	0	0	0	0	0	0	0	0	0	0	0	0	0	0	0	0	0	0	0	0	0	0	0	0	0	0	0	0	25
d__Bacteria	k__norank	p__Bacteroidetes	c__Bacteroidia	o__Bacteroidales	f__Rikenellaceae	g__Rikenellaceae_RC9_gut_group	s__uncultured_bacterium_g__Rikenellaceae_RC9_gut_group	OTU1092	0	0	0	0	29	4	0	0	0	0	0	0	0	0	0	0	0	0	0	0	0	0	0	0	0	0	0	0	0	0	0	0	0	0	0	0	0	0	33
d__Bacteria	k__norank	p__Proteobacteria	c__Deltaproteobacteria	o__Desulfovibrionales	f__Desulfovibrionaceae	g__Desulfovibrio	s__uncultured_bacterium_g__Desulfovibrio	OTU460	8	0	38	15	0	6	0	0	0	0	0	0	0	1	0	0	0	1	0	0	0	0	0	0	0	0	1	0	0	0	0	0	1	0	0	0	3	0	74
d__Bacteria	k__norank	p__Verrucomicrobia	c__Verrucomicrobiae	o__Verrucomicrobiales	f__Verrucomicrobiaceae	g__norank_f__Verrucomicrobiaceae	s__uncultured_Verrucomicrobiales_bacterium_g__norank_f__Verrucomicrobiaceae	OTU1998	0	0	0	0	0	1	0	3	0	0	0	0	0	0	0	0	0	0	58	65	13	22	7	37	6	12	3	28	0	0	0	0	3	0	0	0	0	0	258
d__Bacteria	k__norank	p__Proteobacteria	c__Betaproteobacteria	o__Methylophilales	f__Methylophilaceae	g__unclassified_f__Methylophilaceae	s__unclassified_f__Methylophilaceae	OTU1690	0	0	0	0	0	0	0	0	0	0	0	0	0	0	0	0	0	0	0	0	69	0	0	0	0	0	0	0	0	0	0	0	0	0	0	0	0	0	69
d__Bacteria	k__norank	p__Proteobacteria	c__Alphaproteobacteria	o__Rhodospirillales	f__AKYH478	g__norank_f__AKYH478	s__uncultured_bacterium_g__norank_f__AKYH478	OTU1764	3	0	2	0	0	0	0	0	0	0	0	0	0	0	0	0	0	0	10	10	3	5	7	1	1	0	0	0	0	0	0	0	0	0	0	0	0	0	42
d__Bacteria	k__norank	p__Proteobacteria	c__Gammaproteobacteria	o__X35	f__norank_o__X35	g__norank_o__X35	s__uncultured_gamma_proteobacterium_g__norank_o__X35	OTU1815	0	0	0	0	0	0	0	0	0	0	0	0	0	0	0	0	0	0	6	4	3	3	5	6	3	0	2	0	0	0	0	0	2	0	0	0	0	0	34
d__Bacteria	k__norank	p__Proteobacteria	c__Deltaproteobacteria	o__Myxococcales	f__Archangiaceae	g__unclassified_f__Archangiaceae	s__unclassified_f__Archangiaceae	OTU387	0	0	35	0	0	0	0	0	0	0	0	0	0	0	0	0	0	0	0	1	0	0	0	0	0	0	0	0	0	0	0	0	0	0	0	0	0	0	36
d__Bacteria	k__norank	p__Actinobacteria	c__Actinobacteria	o__norank_c__Actinobacteria	f__norank_c__Actinobacteria	g__norank_c__Actinobacteria	s__uncultured_bacterium_g__norank_c__Actinobacteria	OTU1705	0	0	0	0	0	0	0	0	0	0	0	0	0	0	0	0	0	0	5	3	20	3	8	1	2	6	0	2	0	0	0	0	0	0	0	0	0	0	50
d__Bacteria	k__norank	p__Actinobacteria	c__Actinobacteria	o__Coriobacteriales	f__Coriobacteriaceae	g__Atopobium	s__uncultured_rumen_bacterium_g__Atopobium	OTU905	0	0	0	0	9	0	0	0	0	0	0	0	0	0	0	0	0	0	0	0	0	0	0	0	0	0	0	0	0	0	0	0	0	0	0	0	0	0	9
d__Bacteria	k__norank	p__Proteobacteria	c__Deltaproteobacteria	o__Oligoflexales	f__Oligoflexaceae	g__norank_f__Oligoflexaceae	s__uncultured_bacterium_g__norank_f__Oligoflexaceae	OTU1658	0	0	0	0	0	0	0	0	0	0	0	0	0	0	0	0	0	0	0	0	6	0	0	0	0	0	0	0	0	0	0	0	0	0	0	0	0	0	6
d__Bacteria	k__norank	p__Bacteroidetes	c__Bacteroidia	o__Bacteroidales	f__Prevotellaceae	g__unclassified_f__Prevotellaceae	s__unclassified_f__Prevotellaceae	OTU975	0	11	35	137	172	35	0	0	0	0	0	0	0	0	0	0	0	0	0	0	0	0	0	0	0	0	0	0	0	0	0	0	0	0	0	0	0	0	390
d__Bacteria	k__norank	p__Gemmatimonadetes	c__Gemmatimonadetes	o__Gemmatimonadales	f__Gemmatimonadaceae	g__norank_f__Gemmatimonadaceae	s__uncultured_Gemmatimonadetes_bacterium_g__norank_f__Gemmatimonadaceae	OTU416	0	0	11	0	0	0	0	0	0	0	0	0	0	0	0	0	0	0	0	0	0	0	0	0	0	0	0	0	0	0	0	0	0	0	0	0	0	0	11
d__Bacteria	k__norank	p__Verrucomicrobia	c__Opitutae	o__Puniceicoccales	f__Puniceicoccaceae	g__Pelagicoccus	s__unclassified_g__Pelagicoccus	OTU363	0	0	8	0	0	0	0	0	0	0	0	0	0	0	0	0	0	0	0	0	0	0	0	0	0	0	0	0	0	0	0	0	0	0	0	0	0	0	8
d__Bacteria	k__norank	p__Proteobacteria	c__Gammaproteobacteria	o__Alteromonadales	f__Shewanellaceae	g__Shewanella	s__unclassified_g__Shewanella	OTU1420	0	0	0	0	0	0	11	0	0	0	0	2	0	0	0	0	2	0	0	0	0	1	0	1	3	10	0	0	6	0	0	0	0	0	0	0	0	0	36
d__Bacteria	k__norank	p__Firmicutes	c__Clostridia	o__Clostridiales	f__Ruminococcaceae	g__Papillibacter	s__unclassified_g__Papillibacter	OTU929	0	31	7	40	126	19	0	0	0	0	0	0	0	0	0	0	0	0	0	0	0	0	0	0	0	0	0	0	0	0	0	0	0	0	0	0	0	0	223
d__Bacteria	k__norank	p__Bacteroidetes	c__Bacteroidia	o__Bacteroidales	f__Bacteroidales_BS11_gut_group	g__norank_f__Bacteroidales_BS11_gut_group	s__uncultured_bacterium_g__norank_f__Bacteroidales_BS11_gut_group	OTU732	0	19	56	81	127	54	0	0	0	0	0	0	0	0	0	0	0	0	0	0	0	0	0	0	0	0	0	0	0	0	0	0	0	0	0	0	0	0	337
d__Bacteria	k__norank	p__Bacteroidetes	c__Bacteroidia	o__Bacteroidales	f__PeH15	g__norank_f__PeH15	s__uncultured_rumen_bacterium_g__norank_f__PeH15	OTU1160	0	0	6	0	0	13	0	0	0	0	0	0	0	0	0	0	0	0	0	0	0	0	0	0	0	0	0	0	0	0	0	0	0	0	0	0	0	0	19
d__Bacteria	k__norank	p__Actinobacteria	c__Actinobacteria	o__Solirubrobacterales	f__unclassified_o__Solirubrobacterales	g__unclassified_o__Solirubrobacterales	s__unclassified_o__Solirubrobacterales	OTU705	0	8	2	9	0	0	0	0	0	0	0	0	0	0	0	0	0	0	0	0	0	0	0	0	0	0	0	0	0	0	0	0	0	0	0	0	0	0	19
d__Bacteria	k__norank	p__Proteobacteria	c__Betaproteobacteria	o__Neisseriales	f__Neisseriaceae	g__Deefgea	s__Deefgea_sp._HP12I	OTU1959	0	0	0	0	0	0	0	0	0	0	0	0	0	0	0	0	0	0	31	350	32	479	169	18	250	245	212	5	0	0	0	0	0	0	0	0	0	0	1791
d__Bacteria	k__norank	p__Bacteroidetes	c__Bacteroidia	o__Bacteroidales	f__Bacteroidales_S24-7_group	g__norank_f__Bacteroidales_S24-7_group	s__unclassified_g__norank_f__Bacteroidales_S24-7_group	OTU1120	0	0	0	0	0	15	0	0	0	0	0	0	0	0	0	0	0	0	0	0	0	0	0	0	0	0	0	0	0	0	0	0	0	0	0	0	0	0	15
d__Bacteria	k__norank	p__Planctomycetes	c__Phycisphaerae	o__Tepidisphaerales	f__Tepidisphaeraceae	g__norank_f__Tepidisphaeraceae	s__uncultured_bacterium_g__norank_f__Tepidisphaeraceae	OTU646	0	0	0	7	0	0	0	0	0	0	0	0	0	0	0	0	0	0	0	0	0	0	0	0	0	0	0	0	0	0	0	0	0	0	0	0	0	0	7
d__Bacteria	k__norank	p__Proteobacteria	c__Alphaproteobacteria	o__Rhodospirillales	f__Acetobacteraceae	g__unclassified_f__Acetobacteraceae	s__unclassified_f__Acetobacteraceae	OTU1726	0	0	0	0	0	0	0	0	0	0	1	0	0	0	0	0	0	0	9	2	4	2	7	0	0	2	1	2	0	0	0	0	0	0	0	0	0	0	30
d__Bacteria	k__norank	p__Bacteroidetes	c__Flavobacteriia	o__Flavobacteriales	f__Flavobacteriaceae	g__Bergeyella	s__uncultured_bacterium_g__Bergeyella	OTU840	0	0	0	0	30	0	0	0	0	0	0	0	0	0	0	0	0	0	0	0	0	0	0	0	0	0	0	0	0	0	0	0	0	0	0	0	0	0	30
d__Bacteria	k__norank	p__Proteobacteria	c__Gammaproteobacteria	o__Legionellales	f__Coxiellaceae	g__Aquicella	s__unclassified_g__Aquicella	OTU1942	0	0	0	0	0	0	0	0	0	0	0	0	0	0	0	0	0	0	9	2	11	4	10	1	5	4	2	1	0	0	0	0	0	0	0	0	0	0	49
d__Bacteria	k__norank	p__Actinobacteria	c__Actinobacteria	o__Propionibacteriales	f__Propionibacteriaceae	g__Luteococcus	s__uncultured_bacterium_g__Luteococcus	OTU1180	0	0	0	2	0	2	0	0	0	0	0	0	0	0	0	0	0	0	0	0	0	0	0	0	0	0	0	0	0	0	0	0	1	0	0	0	0	0	5
d__Bacteria	k__norank	p__Bacteroidetes	c__Bacteroidia	o__Bacteroidales	f__Prevotellaceae	g__Prevotellaceae_UCG-003	s__uncultured_bacterium_g__Prevotellaceae_UCG-003	OTU388	0	0	16	0	12	0	0	0	0	0	0	0	0	0	0	0	0	0	0	0	0	0	0	0	0	0	0	0	0	0	0	0	0	0	0	0	0	0	28
d__Bacteria	k__norank	p__Proteobacteria	c__Gammaproteobacteria	o__Pseudomonadales	f__Moraxellaceae	g__Acinetobacter	s__unclassified_g__Acinetobacter	OTU1362	11	9	4	5	0	8	4	8	0	22	7	0	0	0	0	0	0	0	0	0	0	0	0	0	0	0	0	0	0	0	0	0	0	0	0	0	0	0	78
d__Bacteria	k__norank	p__Proteobacteria	c__Deltaproteobacteria	o__Bdellovibrionales	f__Bdellovibrionaceae	g__Bdellovibrio	s__uncultured_Bdellovibrionales_bacterium_g__Bdellovibrio	OTU692	0	0	0	6	0	0	0	0	0	0	0	0	0	0	0	0	0	0	0	0	0	0	0	0	0	0	0	0	0	0	0	0	0	0	0	0	0	0	6
d__Bacteria	k__norank	p__Tenericutes	c__Mollicutes	o__Entomoplasmatales	f__Entomoplasmatales_Incertae_Sedis	g__Candidatus_Hepatoplasma	s__uncultured_bacterium_g__Candidatus_Hepatoplasma	OTU708	9	49	10	16	0	2	24	22	1	0	1	0	15	32	1	0	0	0	0	0	0	0	0	0	0	0	0	0	13	4	0	0	13	0	0	0	0	0	212
d__Bacteria	k__norank	p__Proteobacteria	c__Deltaproteobacteria	o__Myxococcales	f__Polyangiaceae	g__Polyangium	s__uncultured_bacterium_g__Polyangium	OTU1711	0	0	0	0	0	0	0	0	0	0	0	0	0	0	0	0	0	0	0	1	20	0	2	1	1	0	0	0	0	0	0	0	0	0	0	0	0	0	25
d__Bacteria	k__norank	p__Proteobacteria	c__Betaproteobacteria	o__Burkholderiales	f__Burkholderiaceae	g__Burkholderia-Paraburkholderia	s__Paraburkholderia_caledonica	OTU1392	7	13	1	4	6	4	32	87	6	14	76	1	0	0	0	0	0	0	4	4	103	5	70	0	3	1	1	2	1	6	0	1	40	0	4	0	49	1	546
d__Bacteria	k__norank	p__Proteobacteria	c__Betaproteobacteria	o__Burkholderiales	f__Comamonadaceae	g__Sphaerotilus	s__Sphaerotilus_natans_subsp._natans	OTU752	135	12	4	432	0	4	0	1	0	0	2	0	0	0	0	0	0	0	0	0	0	0	0	0	0	0	0	0	0	1	0	0	0	0	0	0	0	0	591
d__Bacteria	k__norank	p__Bacteroidetes	c__Bacteroidia	o__Bacteroidales	f__Porphyromonadaceae	g__Porphyromonas	s__unclassified_g__Porphyromonas	OTU1086	0	0	0	9	0	211	0	0	0	0	0	0	0	0	0	0	0	0	0	0	0	0	0	0	0	0	0	0	0	0	0	0	0	0	0	0	0	0	220
d__Bacteria	k__norank	p__Planctomycetes	c__Phycisphaerae	o__Tepidisphaerales	f__Tepidisphaeraceae	g__norank_f__Tepidisphaeraceae	s__uncultured_soil_bacterium_g__norank_f__Tepidisphaeraceae	OTU7	13	0	0	0	0	0	0	0	0	0	0	0	0	0	0	0	0	0	0	0	0	0	0	0	0	0	0	0	0	0	0	0	0	0	0	0	0	0	13
d__Bacteria	k__norank	p__Bacteroidetes	c__Bacteroidia	o__Bacteroidales	f__Prevotellaceae	g__Prevotellaceae_UCG-001	s__uncultured_bacterium_g__Prevotellaceae_UCG-001	OTU893	0	0	0	0	24	0	0	0	0	0	0	0	0	0	0	0	0	0	0	0	0	0	0	0	0	0	0	0	0	0	0	0	0	0	0	0	0	0	24
d__Bacteria	k__norank	p__Synergistetes	c__Synergistia	o__Synergistales	f__Synergistaceae	g__norank_f__Synergistaceae	s__unclassified_g__norank_f__Synergistaceae	OTU2043	1	0	0	3	0	0	0	0	0	0	0	0	0	0	0	0	0	0	0	0	0	0	0	0	0	0	0	0	1	3	0	0	0	0	0	0	0	0	8
d__Bacteria	k__norank	p__Bacteroidetes	c__Sphingobacteriia	o__Sphingobacteriales	f__norank_o__Sphingobacteriales	g__norank_o__Sphingobacteriales	s__uncultured_bacterium_g__norank_o__Sphingobacteriales	OTU295	11	0	11	0	0	0	0	0	0	0	0	0	0	0	0	0	0	0	0	0	0	0	0	0	0	0	0	0	0	0	0	0	0	0	0	0	0	0	22
d__Bacteria	k__norank	p__Firmicutes	c__Clostridia	o__Clostridiales	f__Clostridiaceae_1	g__Clostridium_sensu_stricto_5	s__Clostridium_bovipellis	OTU2055	0	0	0	0	0	0	0	0	0	0	0	0	1	0	0	0	0	0	3	9	4	11	1	1	1	4	0	5	7	7	0	3	20	0	0	0	2	0	79
d__Bacteria	k__norank	p__Chlamydiae	c__Chlamydiae	o__Chlamydiales	f__Parachlamydiaceae	g__Neochlamydia	s__endosymbiont_of_Naegleria_clarki	OTU1461	0	0	0	0	0	0	0	0	0	0	0	0	0	0	0	0	0	0	1	4	5	0	16	3	2	1	0	1	0	0	0	0	0	0	0	0	0	0	33
d__Bacteria	k__norank	p__Firmicutes	c__Clostridia	o__Clostridiales	f__Lachnospiraceae	g__unclassified_f__Lachnospiraceae	s__unclassified_f__Lachnospiraceae	OTU285	0	0	8	0	0	0	0	0	0	0	0	0	0	0	0	0	0	0	0	0	0	0	0	0	0	0	0	0	0	0	0	0	0	0	0	0	0	0	8
d__Bacteria	k__norank	p__Cyanobacteria	c__Cyanobacteria	o__norank_c__Cyanobacteria	f__norank_c__Cyanobacteria	g__norank_c__Cyanobacteria	s__Euglena_agilis	OTU1926	0	0	0	0	0	0	0	0	0	0	0	0	0	0	0	0	0	0	2	1	0	1	4	5	1	3	2	4	0	0	0	0	0	0	0	0	0	0	23
d__Bacteria	k__norank	p__Bacteroidetes	c__Flavobacteriia	o__Flavobacteriales	f__Flavobacteriaceae	g__unclassified_f__Flavobacteriaceae	s__unclassified_f__Flavobacteriaceae	OTU1186	0	0	0	0	0	39	0	0	0	0	0	0	0	0	0	0	0	0	0	0	0	0	0	0	0	0	0	0	0	0	0	0	0	0	0	0	0	0	39
d__Bacteria	k__norank	p__Firmicutes	c__Erysipelotrichia	o__Erysipelotrichales	f__Erysipelotrichaceae	g__unclassified_f__Erysipelotrichaceae	s__unclassified_f__Erysipelotrichaceae	OTU380	0	0	18	4	18	2	0	0	0	0	0	0	0	0	0	0	0	0	0	0	0	0	0	0	0	0	0	0	0	0	0	0	0	0	0	0	0	0	42
d__Bacteria	k__norank	p__Chloroflexi	c__Chloroflexia	o__Herpetosiphonales	f__Herpetosiphonaceae	g__Herpetosiphon	s__uncultured_bacterium_g__Herpetosiphon	OTU19	8	0	0	0	0	0	0	0	0	0	0	0	0	0	0	0	0	0	0	0	0	0	0	0	0	0	0	0	0	0	0	0	0	0	0	0	0	0	8
d__Bacteria	k__norank	p__Actinobacteria	c__Actinobacteria	o__Micrococcales	f__Jonesiaceae	g__Jonesia	s__Jonesia_denitrificans_DSM_20603	OTU2095	0	0	0	0	0	0	0	1	0	0	0	0	0	0	0	0	0	0	0	0	0	0	0	0	0	0	0	0	0	0	0	0	44	0	0	0	0	0	45
d__Bacteria	k__norank	p__Proteobacteria	c__Gammaproteobacteria	o__X35	f__norank_o__X35	g__norank_o__X35	s__uncultured_bacterium_g__norank_o__X35	OTU1398	0	0	0	0	0	0	0	0	0	0	1	0	0	0	0	0	0	0	0	0	1	0	0	0	0	0	1	0	0	0	0	0	0	0	0	0	0	0	3
d__Bacteria	k__norank	p__Actinobacteria	c__Actinobacteria	o__Coriobacteriales	f__Coriobacteriaceae	g__unclassified_f__Coriobacteriaceae	s__unclassified_f__Coriobacteriaceae	OTU881	0	0	0	0	20	0	0	0	0	0	0	0	0	0	0	0	0	0	0	0	0	0	0	0	0	0	0	0	0	0	0	0	0	0	0	0	0	0	20
d__Bacteria	k__norank	p__Proteobacteria	c__Gammaproteobacteria	o__Pseudomonadales	f__Moraxellaceae	g__Moraxella	s__unclassified_g__Moraxella	OTU1248	0	0	2	5	50	332	0	0	0	0	0	0	0	0	0	0	0	0	0	0	0	0	0	0	0	0	0	0	0	0	0	0	0	0	0	0	0	0	389
d__Bacteria	k__norank	p__Deinococcus-Thermus	c__Deinococci	o__Deinococcales	f__Trueperaceae	g__Truepera	s__unclassified_g__Truepera	OTU1314	0	0	0	0	0	0	0	14	0	0	0	0	0	0	0	0	0	0	0	0	0	0	0	0	0	0	0	0	0	0	0	0	0	0	0	0	0	0	14
d__Bacteria	k__norank	p__Fibrobacteres	c__Fibrobacteria	o__Fibrobacterales	f__Fibrobacteraceae	g__Fibrobacter	s__uncultured_rumen_bacterium_g__Fibrobacter	OTU954	0	117	482	253	1001	270	0	0	0	0	0	0	0	0	0	0	0	0	0	0	0	0	0	0	0	0	0	0	0	0	0	0	0	0	0	0	0	0	2123
d__Bacteria	k__norank	p__Gemmatimonadetes	c__Gemmatimonadetes	o__Gemmatimonadales	f__Gemmatimonadaceae	g__Gemmatirosa	s__uncultured_Gemmatimonadetes_bacterium_g__Gemmatirosa	OTU44	15	0	0	0	0	0	0	0	0	0	0	0	0	0	0	0	0	0	0	0	0	0	0	0	0	0	0	0	0	0	0	0	0	0	0	0	0	0	15
d__Bacteria	k__norank	p__Firmicutes	c__Clostridia	o__Clostridiales	f__Lachnospiraceae	g__[Eubacterium]_ventriosum_group	s__uncultured_organism_g__[Eubacterium]_ventriosum_group	OTU504	0	0	12	0	0	0	0	0	0	0	0	0	0	0	0	0	0	0	0	0	0	0	0	0	0	0	0	0	0	0	0	0	0	0	0	0	0	0	12
d__Bacteria	k__norank	p__Verrucomicrobia	c__Spartobacteria	o__Chthoniobacterales	f__Chthoniobacteraceae	g__Chthoniobacter	s__unclassified_g__Chthoniobacter	OTU1554	4	0	0	0	0	7	0	0	0	1	0	0	0	0	0	0	0	0	12	10	4	3	5	4	0	3	1	5	0	0	0	0	0	0	0	0	0	0	59
d__Bacteria	k__norank	p__Bacteroidetes	c__Bacteroidia	o__Bacteroidales	f__Bacteroidales_BS11_gut_group	g__norank_f__Bacteroidales_BS11_gut_group	s__uncultured_bacterium_g__norank_f__Bacteroidales_BS11_gut_group	OTU1143	0	0	17	6	19	20	0	0	0	0	0	0	0	0	0	0	0	0	0	0	0	0	0	0	0	0	0	0	0	0	0	0	0	0	0	0	0	0	62
d__Bacteria	k__norank	p__Acidobacteria	c__Acidobacteria	o__norank_c__Acidobacteria	f__norank_c__Acidobacteria	g__norank_c__Acidobacteria	s__unclassified_g__norank_c__Acidobacteria	OTU1549	0	0	0	0	0	0	0	0	0	0	0	0	0	0	0	0	0	0	7	9	5	2	6	2	2	1	1	1	0	0	0	0	0	0	0	0	0	0	36
d__Bacteria	k__norank	p__Bacteroidetes	c__Bacteroidia	o__Bacteroidales	f__Bacteroidales_BS11_gut_group	g__norank_f__Bacteroidales_BS11_gut_group	s__uncultured_bacterium_g__norank_f__Bacteroidales_BS11_gut_group	OTU897	0	0	0	0	8	0	0	0	0	0	0	0	0	0	0	0	0	0	0	0	0	0	0	0	0	0	0	0	0	0	0	0	0	0	0	0	0	0	8
d__Bacteria	k__norank	p__Bacteroidetes	c__Bacteroidia	o__Bacteroidales	f__Bacteroidales_S24-7_group	g__norank_f__Bacteroidales_S24-7_group	s__unclassified_g__norank_f__Bacteroidales_S24-7_group	OTU118	3	0	0	0	0	0	0	0	0	0	0	0	0	0	0	0	0	0	0	0	0	0	0	0	0	0	0	0	0	0	0	1	0	0	0	0	0	0	4
d__Bacteria	k__norank	p__Firmicutes	c__Clostridia	o__Clostridiales	f__Clostridiaceae_1	g__Clostridium_sensu_stricto_1	s__unclassified_g__Clostridium_sensu_stricto_1	OTU1637	0	0	0	0	0	0	0	0	0	0	0	0	0	0	0	3	9	0	3	0	4392	32	9341	49	87	16	53	2	32	103	2	830	1	776	84	5	2924	9903	28647
d__Bacteria	k__norank	p__Proteobacteria	c__Epsilonproteobacteria	o__Campylobacterales	f__Helicobacteraceae	g__Helicobacter	s__unclassified_g__Helicobacter	OTU478	0	0	18	0	0	7	0	0	0	0	0	0	0	0	0	0	0	0	0	0	0	0	0	0	0	0	0	0	0	0	0	0	0	0	0	0	0	0	25
d__Bacteria	k__norank	p__Actinobacteria	c__Actinobacteria	o__Acidimicrobiales	f__Acidimicrobiales_Incertae_Sedis	g__Candidatus_Microthrix	s__unclassified_g__Candidatus_Microthrix	OTU2144	0	0	0	0	0	1	7	0	0	1	0	0	0	1	0	0	0	0	10	12	21	16	0	5	0	2	1	1	5	28	3	2	79	0	0	0	0	0	195
d__Bacteria	k__norank	p__Actinobacteria	c__Actinobacteria	o__Streptosporangiales	f__Thermomonosporaceae	g__Actinomadura	s__unclassified_g__Actinomadura	OTU2146	0	0	0	0	43	0	0	0	0	0	0	0	0	0	0	0	0	0	0	0	0	0	0	0	0	0	0	0	1	9	0	0	136	0	0	0	0	0	189
d__Bacteria	k__norank	p__Bacteroidetes	c__Bacteroidia	o__Bacteroidales	f__Bacteroidales_BS11_gut_group	g__norank_f__Bacteroidales_BS11_gut_group	s__uncultured_rumen_bacterium_g__norank_f__Bacteroidales_BS11_gut_group	OTU661	0	0	7	14	0	0	0	0	0	0	0	0	0	0	0	0	0	0	0	0	0	0	0	0	0	0	0	0	0	0	0	0	0	0	0	0	0	0	21
d__Bacteria	k__norank	p__Proteobacteria	c__Gammaproteobacteria	o__Enterobacteriales	f__Enterobacteriaceae	g__Yersinia	s__Yersinia_ruckeri_g__Yersinia	OTU1960	9	0	6	0	3	2	1	2	0	1	1	0	0	0	0	0	0	0	10	162	18	117	44	248	176	185	147	37	0	1	0	0	0	0	0	0	0	0	1170
d__Bacteria	k__norank	p__Firmicutes	c__Clostridia	o__Clostridiales	f__Ruminococcaceae	g__unclassified_f__Ruminococcaceae	s__unclassified_f__Ruminococcaceae	OTU146	8	0	0	0	0	0	0	0	0	0	0	0	0	0	0	0	0	0	0	0	0	0	0	0	0	0	0	0	0	0	0	0	0	0	0	0	0	0	8
d__Bacteria	k__norank	p__SR1__Absconditabacteria_	c__norank_p__SR1__Absconditabacteria_	o__norank_p__SR1__Absconditabacteria_	f__norank_p__SR1__Absconditabacteria_	g__norank_p__SR1__Absconditabacteria_	s__unclassified_g__norank_p__SR1__Absconditabacteria_	OTU1144	0	0	0	0	1	35	0	0	0	0	0	0	0	0	0	0	0	0	0	0	0	0	0	0	0	0	0	0	0	0	0	0	0	0	0	0	0	0	36
d__Bacteria	k__norank	p__Bacteroidetes	c__Bacteroidia	o__Bacteroidales	f__Bacteroidales_BS11_gut_group	g__norank_f__Bacteroidales_BS11_gut_group	s__unclassified_g__norank_f__Bacteroidales_BS11_gut_group	OTU870	0	0	0	7	25	7	0	0	0	0	0	0	0	0	0	0	0	0	0	0	0	0	0	0	0	0	0	0	0	0	0	0	0	0	0	0	0	0	39
d__Bacteria	k__norank	p__Proteobacteria	c__Deltaproteobacteria	o__Desulfobacterales	f__Desulfobacteraceae	g__Sva0081_sediment_group	s__uncultured_soil_bacterium_g__Sva0081_sediment_group	OTU1932	0	0	0	0	0	0	0	0	0	0	0	0	0	0	0	0	0	0	87	67	21	100	42	36	16	9	21	92	0	0	0	0	0	0	0	0	0	0	491
d__Bacteria	k__norank	p__Proteobacteria	c__Alphaproteobacteria	o__Rhodobacterales	f__Rhodobacteraceae	g__Rubellimicrobium	s__uncultured_bacterium_g__Rubellimicrobium	OTU2090	0	0	0	0	0	0	0	0	0	0	0	0	0	0	0	0	0	0	0	0	0	0	0	0	0	0	0	0	1	1	0	0	14	0	0	0	0	0	16
d__Bacteria	k__norank	p__Actinobacteria	c__Actinobacteria	o__Propionibacteriales	f__Propionibacteriaceae	g__Propionicimonas	s__uncultured_bacterium_g__Propionicimonas	OTU2102	0	0	0	0	0	0	0	0	0	0	0	0	0	0	0	0	0	0	0	0	0	0	0	0	0	0	0	0	2	5	0	0	57	0	0	0	0	0	64
d__Bacteria	k__norank	p__Acidobacteria	c__Acidobacteria	o__Solibacterales	f__Solibacteraceae__Subgroup_3_	g__Candidatus_Solibacter	s__unclassified_g__Candidatus_Solibacter	OTU270	0	0	10	0	0	0	0	0	0	0	0	0	0	0	0	0	0	0	0	0	0	0	0	0	0	0	0	0	0	0	0	0	0	0	0	0	0	0	10
d__Bacteria	k__norank	p__Bacteroidetes	c__Bacteroidetes_BD2-2	o__norank_c__Bacteroidetes_BD2-2	f__norank_c__Bacteroidetes_BD2-2	g__norank_c__Bacteroidetes_BD2-2	s__uncultured_rumen_bacterium_g__norank_c__Bacteroidetes_BD2-2	OTU275	0	0	107	48	101	5	0	0	0	0	0	0	0	0	0	0	0	0	0	0	0	0	0	0	0	0	0	0	0	0	0	0	0	0	0	0	0	0	261
d__Bacteria	k__norank	p__Proteobacteria	c__Gammaproteobacteria	o__Pseudomonadales	f__Pseudomonadaceae	g__Pseudomonas	s__unclassified_g__Pseudomonas	OTU1943	51	87	25	21	55	19	92	8	1	21	7	2	2	2	0	0	0	0	25	203	31	294	113	152	405	342	241	147	0	2	0	0	5	0	1	0	0	0	2354
d__Bacteria	k__norank	p__Cyanobacteria	c__Cyanobacteria	o__norank_c__Cyanobacteria	f__norank_c__Cyanobacteria	g__norank_c__Cyanobacteria	s__unclassified_g__norank_c__Cyanobacteria	OTU1431	0	0	0	0	0	0	0	0	0	0	0	0	0	0	0	0	0	0	4	1	1	1	0	1	0	2	0	0	0	0	0	0	0	0	0	0	0	0	10
d__Bacteria	k__norank	p__Actinobacteria	c__Actinobacteria	o__Frankiales	f__unclassified_o__Frankiales	g__unclassified_o__Frankiales	s__unclassified_o__Frankiales	OTU1632	0	0	0	0	0	0	0	0	0	0	0	0	0	0	0	0	0	0	6	7	11	2	1	0	4	4	0	4	0	0	0	0	0	0	0	0	0	0	39
d__Bacteria	k__norank	p__Bacteroidetes	c__Bacteroidia	o__Bacteroidales	f__Bacteroidaceae	g__Bacteroides	s__unclassified_g__Bacteroides	OTU793	0	0	0	0	26	0	0	0	0	0	0	1	0	0	0	0	0	0	0	0	0	0	1	0	0	0	0	1	0	0	0	0	2	0	0	0	3	0	34
d__Bacteria	k__norank	p__Chloroflexi	c__1-20	o__norank_c__1-20	f__norank_c__1-20	g__norank_c__1-20	s__uncultured_bacterium_g__norank_c__1-20	OTU1592	0	0	0	0	0	0	0	0	0	0	0	0	0	0	0	0	0	0	7	6	11	6	1	3	1	1	1	0	0	0	0	0	0	0	0	0	0	0	37
d__Bacteria	k__norank	p__Acidobacteria	c__Acidobacteria	o__norank_c__Acidobacteria	f__norank_c__Acidobacteria	g__norank_c__Acidobacteria	s__unclassified_g__norank_c__Acidobacteria	OTU520	0	0	6	0	0	0	0	0	0	0	0	0	0	0	0	0	0	0	0	0	0	0	0	0	0	0	0	0	0	0	0	0	0	0	0	0	0	0	6
d__Bacteria	k__norank	p__Bacteroidetes	c__Bacteroidia	o__Bacteroidales	f__Bacteroidales_BS11_gut_group	g__norank_f__Bacteroidales_BS11_gut_group	s__unclassified_g__norank_f__Bacteroidales_BS11_gut_group	OTU1242	0	14	36	12	57	33	0	0	0	0	0	0	0	0	0	0	0	0	0	0	0	0	0	0	0	0	0	0	0	0	0	0	0	0	0	0	0	0	152
d__Bacteria	k__norank	p__Spirochaetae	c__Spirochaetes	o__Spirochaetales	f__Spirochaetaceae	g__Treponema_2	s__uncultured_bacterium_g__Treponema_2	OTU703	0	0	19	26	0	12	0	0	0	0	0	0	0	0	0	0	0	0	0	0	0	0	0	0	0	0	0	0	0	0	0	0	0	0	0	0	0	0	57
d__Bacteria	k__norank	p__Bacteroidetes	c__Bacteroidia	o__Bacteroidales	f__Bacteroidales_S24-7_group	g__norank_f__Bacteroidales_S24-7_group	s__uncultured_rumen_bacterium_g__norank_f__Bacteroidales_S24-7_group	OTU1113	0	0	2	0	2	13	0	0	0	0	0	0	0	0	0	0	0	0	0	0	0	0	0	0	0	0	0	0	0	0	0	0	0	0	0	0	0	0	17
d__Bacteria	k__norank	p__Proteobacteria	c__Gammaproteobacteria	o__X35	f__norank_o__X35	g__norank_o__X35	s__uncultured_bacterium_g__norank_o__X35	OTU1833	0	0	0	0	0	0	0	0	0	0	0	0	0	0	0	0	0	0	3	0	1	0	4	3	0	0	0	1	0	0	0	0	1	0	0	0	0	0	13
d__Bacteria	k__norank	p__Proteobacteria	c__Gammaproteobacteria	o__Chromatiales	f__Chromatiaceae	g__unclassified_f__Chromatiaceae	s__unclassified_f__Chromatiaceae	OTU1279	0	0	0	0	0	0	19	7	0	0	0	0	0	0	0	0	0	0	0	0	0	0	0	0	0	0	0	0	0	0	0	0	0	0	0	0	0	0	26
d__Bacteria	k__norank	p__Bacteroidetes	c__Bacteroidia	o__Bacteroidales	f__Prevotellaceae	g__unclassified_f__Prevotellaceae	s__unclassified_f__Prevotellaceae	OTU1236	0	0	0	0	29	13	0	0	0	0	0	0	0	0	0	0	0	0	0	0	0	0	0	0	0	0	0	0	0	0	0	0	0	0	0	0	0	0	42
d__Bacteria	k__norank	p__TM6__Dependentiae_	c__norank_p__TM6__Dependentiae_	o__norank_p__TM6__Dependentiae_	f__norank_p__TM6__Dependentiae_	g__norank_p__TM6__Dependentiae_	s__uncultured_bacterium_g__norank_p__TM6__Dependentiae_	OTU1789	0	0	0	0	0	0	0	0	0	0	0	0	0	0	0	0	0	0	2	2	0	1	5	0	0	2	0	1	0	0	0	0	0	0	0	0	0	0	13
d__Bacteria	k__norank	p__Verrucomicrobia	c__Spartobacteria	o__Chthoniobacterales	f__LD29	g__norank_f__LD29	s__unclassified_g__norank_f__LD29	OTU1337	0	0	0	0	0	1	4	53	2	1	0	0	0	1	0	0	0	0	0	0	0	0	0	0	0	0	0	0	1	0	0	0	1	0	0	0	0	0	64
d__Bacteria	k__norank	p__Chloroflexi	c__TK10	o__norank_c__TK10	f__norank_c__TK10	g__norank_c__TK10	s__uncultured_Chloroflexus_sp._g__norank_c__TK10	OTU233	0	10	0	0	0	0	0	0	0	0	0	0	0	0	0	0	0	0	2	0	4	1	5	0	0	1	0	0	0	0	0	0	2	0	0	0	0	0	25
d__Bacteria	k__norank	p__Cyanobacteria	c__Cyanobacteria	o__norank_c__Cyanobacteria	f__norank_c__Cyanobacteria	g__norank_c__Cyanobacteria	s__unclassified_g__norank_c__Cyanobacteria	OTU1541	0	0	0	0	0	0	0	0	0	0	0	0	0	0	0	0	0	0	16	40	9	4	12	16	2	2	5	1	0	0	0	0	1	0	0	0	0	0	108
d__Bacteria	k__norank	p__Chloroflexi	c__SJA-15	o__norank_c__SJA-15	f__norank_c__SJA-15	g__norank_c__SJA-15	s__unclassified_g__norank_c__SJA-15	OTU1927	0	0	7	0	0	0	0	0	0	0	0	0	0	0	0	0	0	0	19	27	41	34	11	10	3	5	7	10	0	0	0	0	0	0	0	0	0	0	174
d__Bacteria	k__norank	p__Gemmatimonadetes	c__Gemmatimonadetes	o__Gemmatimonadales	f__Gemmatimonadaceae	g__norank_f__Gemmatimonadaceae	s__unclassified_g__norank_f__Gemmatimonadaceae	OTU594	0	0	13	0	0	0	0	0	0	0	0	0	0	0	0	0	0	0	0	0	0	0	0	0	0	0	0	0	0	0	0	0	0	0	0	0	0	0	13
d__Bacteria	k__norank	p__Proteobacteria	c__Deltaproteobacteria	o__Desulfovibrionales	f__Desulfovibrionaceae	g__Desulfovibrio	s__unclassified_g__Desulfovibrio	OTU357	0	0	12	0	0	0	0	0	0	0	0	0	0	0	0	0	0	0	0	0	0	0	0	0	0	0	0	0	0	0	0	0	0	0	0	0	0	0	12
d__Bacteria	k__norank	p__Planctomycetes	c__Planctomycetacia	o__Planctomycetales	f__Planctomycetaceae	g__norank_f__Planctomycetaceae	s__uncultured_Gemmata_sp._g__norank	OTU1530	0	0	2	0	0	0	0	0	0	0	0	0	0	0	0	0	0	0	4	4	2	1	0	3	2	1	0	0	0	0	0	0	0	0	0	0	0	0	19
d__Bacteria	k__norank	p__Cyanobacteria	c__Cyanobacteria	o__SubsectionIII	f__FamilyI_o__SubsectionIII	g__unclassified_f__FamilyI_o__SubsectionIII	s__unclassified_f__FamilyI_o__SubsectionIII	OTU1823	0	0	0	0	0	0	0	0	0	0	0	0	0	0	0	0	0	0	4	4	8	0	11	0	0	1	0	0	0	0	0	0	0	0	0	0	0	0	28
d__Bacteria	k__norank	p__Bacteroidetes	c__Bacteroidia	o__Bacteroidales	f__Prevotellaceae	g__Prevotella_1	s__unclassified_g__Prevotella_1	OTU200	0	19	0	0	17	0	0	0	0	0	0	0	0	0	0	0	0	0	0	0	0	0	0	0	0	0	0	0	0	0	0	0	0	0	0	0	0	0	36
d__Bacteria	k__norank	p__Actinobacteria	c__Actinobacteria	o__Frankiales	f__Nakamurellaceae	g__Nakamurella	s__Sanguibacter_sp._804B5_12ECASO	OTU1410	0	0	15	1	0	4	3	3	3	3	1	0	0	8	0	0	0	0	0	0	0	0	0	0	0	0	0	0	0	0	0	0	0	0	0	0	0	0	41
d__Bacteria	k__norank	p__Firmicutes	c__unclassified_p__Firmicutes	o__unclassified_p__Firmicutes	f__unclassified_p__Firmicutes	g__unclassified_p__Firmicutes	s__unclassified_p__Firmicutes	OTU1451	0	0	0	0	0	0	0	0	2	0	0	0	0	0	0	0	0	0	101	280	85	269	98	25	21	93	41	140	0	0	0	0	0	0	0	0	0	0	1155
d__Bacteria	k__norank	p__Chloroflexi	c__Anaerolineae	o__Anaerolineales	f__Anaerolineaceae	g__norank_f__Anaerolineaceae	s__unclassified_g__norank_f__Anaerolineaceae	OTU1636	0	0	0	0	0	0	0	0	0	0	0	0	0	0	0	0	0	0	12	21	16	3	4	5	1	2	1	3	0	0	0	0	0	0	0	0	0	0	68
d__Bacteria	k__norank	p__Acidobacteria	c__Acidobacteria	o__Blastocatellales	f__Blastocatellaceae__Subgroup_4_	g__norank_f__Blastocatellaceae__Subgroup_4_	s__unclassified_g__norank_f__Blastocatellaceae__Subgroup_4_	OTU1810	0	0	1	0	0	0	0	0	0	0	0	0	0	0	0	0	0	0	0	3	2	0	3	0	0	0	0	0	0	0	0	0	0	0	0	0	0	0	9
d__Bacteria	k__norank	p__Tenericutes	c__Mollicutes	o__Anaeroplasmatales	f__Anaeroplasmataceae	g__Anaeroplasma	s__uncultured_bacterium_g__Anaeroplasma	OTU575	0	0	21	3	0	3	0	0	0	0	0	0	0	0	0	0	0	0	0	0	0	0	0	0	0	0	0	0	0	0	0	0	0	0	0	0	0	0	27
d__Bacteria	k__norank	p__unclassified_k__norank	c__unclassified_k__norank	o__unclassified_k__norank	f__unclassified_k__norank	g__unclassified_k__norank	s__unclassified_k__norank	OTU1514	2	0	0	0	0	0	0	0	0	0	0	0	0	0	0	0	0	0	18	15	3	5	6	1	2	3	1	4	2	0	0	0	1	0	0	0	0	0	63
d__Bacteria	k__norank	p__Planctomycetes	c__OM190	o__norank_c__OM190	f__norank_c__OM190	g__norank_c__OM190	s__uncultured_bacterium_g__norank_c__OM190	OTU1973	0	0	0	0	0	0	0	0	0	0	0	0	0	0	0	0	0	0	0	3	2	1	4	1	0	0	3	2	0	0	0	0	0	0	0	0	0	0	16
d__Bacteria	k__norank	p__Firmicutes	c__Clostridia	o__Clostridiales	f__Christensenellaceae	g__Christensenellaceae_R-7_group	s__unclassified_g__Christensenellaceae_R-7_group	OTU971	0	0	26	4	39	5	0	0	0	0	0	0	0	0	0	0	0	0	0	0	0	0	0	0	0	0	0	0	0	0	0	0	0	0	0	0	0	0	74
d__Bacteria	k__norank	p__Proteobacteria	c__Alphaproteobacteria	o__Rhodospirillales	f__Acetobacteraceae	g__Rubritepida	s__uncultured_bacterium_g__Rubritepida	OTU1353	0	0	0	0	0	0	2	9	0	0	0	0	0	0	0	0	0	0	0	0	0	0	0	0	0	0	0	0	2	9	0	0	0	0	0	0	0	0	22
d__Bacteria	k__norank	p__Proteobacteria	c__Alphaproteobacteria	o__Rhodospirillales	f__Rhodospirillaceae	g__Skermanella	s__unclassified_g__Skermanella	OTU476	0	0	5	0	0	0	7	0	0	0	0	0	0	0	0	0	0	0	0	0	0	0	0	0	0	0	0	0	0	0	0	0	0	0	0	0	0	0	12
d__Bacteria	k__norank	p__Cyanobacteria	c__Cyanobacteria	o__SubsectionIII	f__FamilyI_o__SubsectionIII	g__norank_f__FamilyI_o__SubsectionIII	s__uncultured_Phormidium_sp._g__norank	OTU1822	0	0	0	0	0	0	0	0	0	0	0	0	0	0	0	0	0	0	0	0	0	0	244	0	0	0	0	0	0	0	0	0	0	0	0	0	0	0	244
d__Bacteria	k__norank	p__Chloroflexi	c__Anaerolineae	o__Anaerolineales	f__Anaerolineaceae	g__norank_f__Anaerolineaceae	s__Chloroflexi_bacterium_OLB13	OTU361	0	0	12	0	0	0	0	0	0	0	0	0	0	0	0	0	0	0	0	0	0	0	0	0	0	0	0	0	0	0	0	0	0	0	0	0	0	0	12
d__Bacteria	k__norank	p__Actinobacteria	c__Actinobacteria	o__Corynebacteriales	f__Mycobacteriaceae	g__Mycobacterium	s__unclassified_g__Mycobacterium	OTU1633	13	3	2	0	0	1	9	6	0	1	0	0	0	0	0	0	0	0	57	79	135	50	61	24	25	17	22	18	1	9	0	0	13	0	0	0	0	0	546
d__Bacteria	k__norank	p__Verrucomicrobia	c__WCHB1-41	o__norank_c__WCHB1-41	f__norank_c__WCHB1-41	g__norank_c__WCHB1-41	s__uncultured_rumen_bacterium_g__norank_c__WCHB1-41	OTU803	0	0	0	9	11	0	0	0	0	0	0	0	0	0	0	0	0	0	0	0	0	0	0	0	0	0	0	0	0	0	0	0	0	0	0	0	0	0	20
d__Bacteria	k__norank	p__Firmicutes	c__Clostridia	o__Clostridiales	f__Peptostreptococcaceae	g__unclassified_f__Peptostreptococcaceae	s__unclassified_f__Peptostreptococcaceae	OTU1272	0	0	0	0	0	0	17	0	0	0	0	0	0	0	0	0	0	0	0	0	0	0	0	0	0	0	0	0	0	0	0	0	0	0	0	0	0	0	17
d__Bacteria	k__norank	p__unclassified_k__norank	c__unclassified_k__norank	o__unclassified_k__norank	f__unclassified_k__norank	g__unclassified_k__norank	s__unclassified_k__norank	OTU1601	0	0	0	0	0	0	0	0	0	0	0	0	0	0	0	0	0	0	0	0	8	0	0	0	0	0	0	0	0	0	0	0	0	0	0	0	0	0	8
d__Bacteria	k__norank	p__Proteobacteria	c__Alphaproteobacteria	o__Rhizobiales	f__unclassified_o__Rhizobiales	g__unclassified_o__Rhizobiales	s__unclassified_o__Rhizobiales	OTU2107	0	0	0	0	0	0	0	0	0	0	0	0	0	0	0	0	0	0	0	0	0	0	0	0	0	0	0	0	0	0	0	0	6	0	0	0	0	0	6
d__Bacteria	k__norank	p__Firmicutes	c__Bacilli	o__Bacillales	f__Bacillaceae	g__Bacillus	s__Bacillus_thermolactis	OTU1381	0	0	0	0	0	0	0	0	0	11	8	0	0	0	0	0	0	0	0	0	0	0	0	0	0	0	0	0	0	0	0	0	0	0	0	0	5	0	24
d__Bacteria	k__norank	p__Verrucomicrobia	c__WCHB1-41	o__norank_c__WCHB1-41	f__norank_c__WCHB1-41	g__norank_c__WCHB1-41	s__uncultured_rumen_bacterium_g__norank_c__WCHB1-41	OTU487	0	0	19	0	1	0	0	0	0	0	0	0	0	0	0	0	0	0	0	0	0	0	0	0	0	0	0	0	0	0	0	0	0	0	0	0	0	0	20
d__Bacteria	k__norank	p__Actinobacteria	c__Actinobacteria	o__Micrococcales	f__Sanguibacteraceae	g__Sanguibacter	s__uncultured_bacterium_g__Sanguibacter	OTU2088	0	0	0	0	0	0	0	1	0	0	0	0	0	0	0	0	0	0	0	0	0	0	0	0	0	0	0	0	0	1	0	0	9	0	0	0	0	0	11
d__Bacteria	k__norank	p__Chlamydiae	c__Chlamydiae	o__Chlamydiales	f__Parachlamydiaceae	g__unclassified_f__Parachlamydiaceae	s__unclassified_f__Parachlamydiaceae	OTU1491	0	0	0	0	0	0	0	0	0	0	0	0	0	0	0	0	0	0	5	9	11	1	7	4	3	2	2	0	0	0	0	0	0	0	0	0	0	0	44
d__Bacteria	k__norank	p__Proteobacteria	c__Alphaproteobacteria	o__Sphingomonadales	f__Erythrobacteraceae	g__unclassified_f__Erythrobacteraceae	s__unclassified_f__Erythrobacteraceae	OTU1667	0	0	0	1	0	0	0	0	0	0	0	0	0	0	0	0	0	0	0	0	32	0	0	0	0	0	0	0	0	0	0	0	0	0	0	0	0	0	33
d__Bacteria	k__norank	p__Bacteroidetes	c__Bacteroidia	o__Bacteroidales	f__Prevotellaceae	g__Prevotellaceae_UCG-001	s__uncultured_rumen_bacterium_g__Prevotellaceae_UCG-001	OTU1329	0	0	0	0	0	0	0	5	1	0	0	0	0	0	0	0	0	0	0	0	0	0	0	0	0	0	0	0	0	0	0	0	0	0	0	0	0	0	6
d__Bacteria	k__norank	p__Actinobacteria	c__Actinobacteria	o__Solirubrobacterales	f__Elev-16S-1332	g__norank_f__Elev-16S-1332	s__uncultured_actinobacterium_g__norank_f__Elev-16S-1332	OTU1376	0	0	0	0	0	0	0	0	1	1	4	0	0	0	0	0	0	0	1	1	0	0	0	1	0	0	0	0	1	0	0	0	3	0	0	0	0	0	13
d__Bacteria	k__norank	p__Proteobacteria	c__Alphaproteobacteria	o__Rhizobiales	f__Hyphomicrobiaceae	g__Devosia	s__unclassified_g__Devosia	OTU494	14	4	5	0	0	1	0	0	0	0	1	0	0	1	0	0	0	0	0	0	0	0	0	0	0	0	0	0	0	0	0	3	9	0	0	0	0	0	38
d__Bacteria	k__norank	p__Bacteroidetes	c__unclassified_p__Bacteroidetes	o__unclassified_p__Bacteroidetes	f__unclassified_p__Bacteroidetes	g__unclassified_p__Bacteroidetes	s__unclassified_p__Bacteroidetes	OTU712	0	0	0	13	0	4	0	0	0	0	0	0	0	0	0	0	0	0	0	0	0	0	0	0	0	0	0	0	0	0	0	0	0	0	0	0	0	0	17
d__Bacteria	k__norank	p__Proteobacteria	c__Alphaproteobacteria	o__Rickettsiales	f__Holosporaceae	g__norank_f__Holosporaceae	s__uncultured_Holosporaceae_bacterium	OTU1964	0	0	0	0	0	0	0	0	0	0	0	0	0	0	0	0	0	0	136	174	33	102	35	47	37	44	47	40	0	0	0	0	1	0	0	0	0	0	696
d__Bacteria	k__norank	p__Proteobacteria	c__Gammaproteobacteria	o__Xanthomonadales	f__Xanthomonadaceae	g__Silanimonas	s__uncultured_bacterium_g__Silanimonas	OTU88	11	0	0	1	0	0	0	0	0	0	0	0	0	0	0	0	0	0	0	0	0	0	0	0	0	0	0	0	0	0	0	0	0	0	0	0	0	0	12
d__Bacteria	k__norank	p__Saccharibacteria	c__norank_p__Saccharibacteria	o__norank_p__Saccharibacteria	f__norank_p__Saccharibacteria	g__norank_p__Saccharibacteria	s__unclassified_g__norank_p__Saccharibacteria	OTU1608	0	0	0	0	0	0	0	0	0	0	0	0	0	0	0	0	0	0	4	4	4	3	0	1	0	0	0	0	0	0	0	0	0	0	0	0	0	0	16
d__Bacteria	k__norank	p__Firmicutes	c__Clostridia	o__Clostridiales	f__Christensenellaceae	g__Christensenellaceae_R-7_group	s__unclassified_g__Christensenellaceae_R-7_group	OTU210	0	10	0	0	0	1	0	0	0	0	0	0	0	0	0	0	0	0	0	0	0	0	0	0	0	0	0	0	0	0	0	0	0	0	0	0	0	0	11
d__Bacteria	k__norank	p__Firmicutes	c__Clostridia	o__Clostridiales	f__Peptostreptococcaceae	g__Acetoanaerobium	s__uncultured_bacterium_g__Acetoanaerobium	OTU2103	0	0	0	0	0	0	0	0	0	0	0	0	0	1	0	0	0	0	0	0	0	0	0	0	0	0	0	0	1	3	0	1	9	0	0	0	0	0	15
d__Bacteria	k__norank	p__Firmicutes	c__Erysipelotrichia	o__Erysipelotrichales	f__Erysipelotrichaceae	g__Erysipelatoclostridium	s__uncultured_bacterium_g__Erysipelatoclostridium	OTU2016	0	0	0	0	0	0	0	0	0	0	0	0	0	0	0	0	0	0	0	0	0	0	0	0	0	0	0	0	15	0	0	0	0	0	0	0	0	0	15
d__Bacteria	k__norank	p__Bacteroidetes	c__Bacteroidia	o__Bacteroidales	f__Prevotellaceae	g__Prevotellaceae_NK3B31_group	s__uncultured_rumen_bacterium_g__Prevotellaceae_NK3B31_group	OTU531	0	0	22	12	65	4	0	0	0	0	0	0	0	0	0	0	0	0	0	0	0	0	0	0	0	0	0	0	0	0	0	0	0	0	0	0	0	0	103
d__Bacteria	k__norank	p__Bacteroidetes	c__Flavobacteriia	o__Flavobacteriales	f__Flavobacteriaceae	g__Myroides	s__unclassified_g__Myroides	OTU2154	0	0	0	0	0	0	3	0	0	0	0	0	0	0	0	0	0	0	0	0	0	0	0	0	0	0	0	0	0	0	0	0	0	0	0	0	5	0	8
d__Bacteria	k__norank	p__Actinobacteria	c__Actinobacteria	o__PeM15	f__norank_o__PeM15	g__norank_o__PeM15	s__uncultured_bacterium_g__norank_o__PeM15	OTU321	4	3	13	5	0	0	19	29	0	0	0	0	0	0	0	0	0	0	0	1	1	0	0	0	1	1	0	0	8	27	4	6	163	0	0	0	0	0	285
d__Bacteria	k__norank	p__Proteobacteria	c__Alphaproteobacteria	o__Rhizobiales	f__unclassified_o__Rhizobiales	g__unclassified_o__Rhizobiales	s__unclassified_o__Rhizobiales	OTU1572	0	0	0	0	0	0	0	0	0	0	0	0	0	0	0	0	0	0	0	0	16	0	0	0	0	0	0	0	0	0	0	0	0	0	0	0	0	0	16
d__Bacteria	k__norank	p__Bacteroidetes	c__Bacteroidia	o__Bacteroidales	f__Prevotellaceae	g__Prevotellaceae_UCG-001	s__uncultured_rumen_bacterium_g__Prevotellaceae_UCG-001	OTU1033	0	0	0	1	31	18	0	0	0	0	0	0	0	0	0	0	0	0	0	0	0	0	0	0	0	0	0	0	0	0	0	0	0	0	0	0	0	0	50
d__Bacteria	k__norank	p__Proteobacteria	c__Gammaproteobacteria	o__Methylococcales	f__Crenotrichaceae	g__Crenothrix	s__uncultured_bacterium_g__Crenothrix	OTU66	1	10	0	0	0	0	0	0	0	0	0	0	0	0	0	0	0	0	0	0	0	0	0	0	0	0	0	0	0	0	0	0	0	0	0	0	0	0	11
d__Bacteria	k__norank	p__Bacteroidetes	c__Bacteroidia	o__Bacteroidales	f__Bacteroidales_BS11_gut_group	g__norank_f__Bacteroidales_BS11_gut_group	s__unclassified_g__norank_f__Bacteroidales_BS11_gut_group	OTU1090	0	0	9	10	31	98	0	0	0	0	0	0	0	0	0	0	0	0	0	0	0	0	0	0	0	0	0	0	0	0	0	0	0	0	0	0	0	0	148
d__Bacteria	k__norank	p__Tenericutes	c__Mollicutes	o__unclassified_c__Mollicutes	f__unclassified_c__Mollicutes	g__unclassified_c__Mollicutes	s__unclassified_c__Mollicutes	OTU694	0	0	0	8	0	4	0	0	0	0	0	0	0	0	0	0	0	0	0	0	0	0	0	0	0	0	0	0	0	0	0	0	0	0	0	0	0	0	12
d__Bacteria	k__norank	p__Bacteroidetes	c__Bacteroidia	o__Bacteroidales	f__Rikenellaceae	g__Rikenellaceae_RC9_gut_group	s__unclassified_g__Rikenellaceae_RC9_gut_group	OTU566	0	7	125	60	146	53	0	0	0	0	0	0	0	0	0	0	0	0	0	0	0	0	0	0	0	0	0	0	0	0	0	0	0	0	0	0	0	0	391
d__Bacteria	k__norank	p__Firmicutes	c__Clostridia	o__Clostridiales	f__Family_XIII	g__Anaerovorax	s__uncultured_rumen_bacterium_g__Anaerovorax	OTU333	0	0	8	1	0	5	0	0	0	0	0	0	0	0	0	0	0	0	0	0	0	0	0	0	0	0	0	0	0	0	0	0	0	0	0	0	0	0	14
d__Bacteria	k__norank	p__Fusobacteria	c__Fusobacteriia	o__Fusobacteriales	f__Fusobacteriaceae	g__Cetobacterium	s__uncultured_bacterium_g__Cetobacterium	OTU2061	1072	329	19	73	100	172	0	0	0	1	22	28325	0	5	1	23984	23564	35237	11	32	26	12	12	5	105	19	51	38	23815	23742	28268	32140	1755	40142	9034	12121	13766	14787	312785
d__Bacteria	k__norank	p__Actinobacteria	c__Actinobacteria	o__Gaiellales	f__Gaiellaceae	g__Gaiella	s__unclassified_g__Gaiella	OTU1063	0	0	0	0	14	0	0	0	0	0	0	0	0	0	0	0	0	0	0	0	0	0	0	0	0	0	0	0	0	0	0	0	0	0	0	0	0	0	14
d__Bacteria	k__norank	p__Actinobacteria	c__Actinobacteria	o__Propionibacteriales	f__Nocardioidaceae	g__Nocardioides	s__Nocardioides_jensenii	OTU2118	0	0	0	0	0	0	0	0	0	0	0	0	0	0	0	0	0	0	0	0	0	0	0	0	0	0	0	0	1	0	0	0	10	0	0	0	0	0	11
d__Bacteria	k__norank	p__Proteobacteria	c__Alphaproteobacteria	o__Rhizobiales	f__alphaI_cluster	g__norank_f__alphaI_cluster	s__uncultured_bacterium_g__norank_f__alphaI_cluster	OTU1984	0	0	0	0	0	0	0	0	0	0	0	0	0	0	0	0	0	0	49	69	45	71	17	30	6	24	15	15	1	0	0	1	6	0	0	0	0	0	349
d__Bacteria	k__norank	p__Chloroflexi	c__SJA-15	o__norank_c__SJA-15	f__norank_c__SJA-15	g__norank_c__SJA-15	s__uncultured_Chloroflexi_bacterium_g__norank_c__SJA-15	OTU24	17	0	0	0	0	0	0	0	0	0	0	0	0	0	0	0	0	0	0	0	0	0	0	0	0	0	0	0	0	0	0	0	0	0	0	0	0	0	17
d__Bacteria	k__norank	p__Saccharibacteria	c__norank_p__Saccharibacteria	o__norank_p__Saccharibacteria	f__norank_p__Saccharibacteria	g__norank_p__Saccharibacteria	s__unclassified_g__norank_p__Saccharibacteria	OTU1287	0	0	0	0	0	2	5	4	0	0	0	0	0	0	0	0	0	0	0	1	0	0	0	0	0	0	0	0	2	0	0	1	3	0	0	0	0	0	18
d__Bacteria	k__norank	p__Nitrospirae	c__Nitrospira	o__norank_c__Nitrospira	f__norank_c__Nitrospira	g__Nitrospira	s__Nitrospira_sp.	OTU583	14	0	5	0	0	0	0	0	0	0	0	0	0	0	0	0	0	0	0	0	0	0	0	0	0	0	0	0	0	0	0	0	0	0	0	0	0	0	19
d__Bacteria	k__norank	p__Firmicutes	c__Clostridia	o__Clostridiales	f__Lachnospiraceae	g__[Ruminococcus]_gauvreauii_group	s__uncultured_rumen_bacterium_g__[Ruminococcus]_gauvreauii_group	OTU896	0	0	3	0	28	5	0	0	0	0	0	0	0	0	0	0	0	0	0	0	0	0	0	0	0	0	0	0	0	0	0	0	0	0	0	0	0	0	36
d__Bacteria	k__norank	p__Actinobacteria	c__Actinobacteria	o__Corynebacteriales	f__Corynebacteriaceae	g__Corynebacterium	s__Corynebacterium_humireducens_NBRC_106098__DSM_45392	OTU2083	0	0	0	0	0	0	0	0	0	0	0	0	0	0	0	0	0	0	0	0	0	0	0	0	0	0	0	0	0	1	1	0	22	0	0	0	0	0	24
d__Bacteria	k__norank	p__Cyanobacteria	c__Cyanobacteria	o__norank_c__Cyanobacteria	f__norank_c__Cyanobacteria	g__norank_c__Cyanobacteria	s__unclassified_g__norank_c__Cyanobacteria	OTU1894	0	0	0	0	0	0	0	0	0	0	0	0	0	0	0	0	0	0	240	203	310	125	107	124	49	183	17	134	0	3	0	0	2	0	0	0	0	1	1498
d__Bacteria	k__norank	p__Proteobacteria	c__Alphaproteobacteria	o__Rhizobiales	f__Phyllobacteriaceae	g__Phyllobacterium	s__unclassified_g__Phyllobacterium	OTU1345	22	8	1	5	0	7	18	31	0	26	10	0	0	14	0	0	0	0	0	0	4	0	0	0	0	0	0	0	1	0	0	1	16	0	0	0	0	0	164
d__Bacteria	k__norank	p__Tenericutes	c__Mollicutes	o__Mollicutes_RF9	f__norank_o__Mollicutes_RF9	g__norank_o__Mollicutes_RF9	s__unclassified_g__norank_o__Mollicutes_RF9	OTU523	0	0	53	2	60	12	0	0	0	0	0	0	0	0	0	0	0	0	0	0	0	0	0	0	0	0	0	0	0	0	0	0	0	0	0	0	0	0	127
d__Bacteria	k__norank	p__Bacteroidetes	c__Bacteroidia	o__Bacteroidales	f__Prevotellaceae	g__Prevotellaceae_UCG-004	s__uncultured_rumen_bacterium_g__Prevotellaceae_UCG-004	OTU889	0	28	32	112	323	86	0	0	0	0	0	0	0	0	0	0	0	0	0	0	0	0	0	0	0	0	0	0	0	0	0	0	0	0	0	0	0	0	581
d__Bacteria	k__norank	p__Actinobacteria	c__Actinobacteria	o__Propionibacteriales	f__Propionibacteriaceae	g__Micropruina	s__uncultured_bacterium_g__Micropruina	OTU2060	0	0	0	0	0	0	10	2	0	1	0	0	0	0	0	0	0	0	0	0	0	0	0	0	0	0	0	0	2	1	1	1	45	0	0	0	0	0	63
d__Bacteria	k__norank	p__Lentisphaerae	c__Lentisphaeria	o__Victivallales	f__vadinBE97	g__norank_f__vadinBE97	s__uncultured_bacterium_g__norank_f__vadinBE97	OTU989	0	0	0	0	16	0	0	0	0	0	0	0	0	0	0	0	0	0	0	0	0	0	0	0	0	0	0	0	0	0	0	0	0	0	0	0	0	0	16
d__Bacteria	k__norank	p__Bacteroidetes	c__unclassified_p__Bacteroidetes	o__unclassified_p__Bacteroidetes	f__unclassified_p__Bacteroidetes	g__unclassified_p__Bacteroidetes	s__unclassified_p__Bacteroidetes	OTU666	0	0	4	25	14	6	0	0	0	0	0	0	0	0	0	0	0	0	0	0	0	0	0	0	0	0	0	0	0	0	0	0	0	0	0	0	0	0	49
d__Bacteria	k__norank	p__Proteobacteria	c__Deltaproteobacteria	o__Myxococcales	f__unclassified_o__Myxococcales	g__unclassified_o__Myxococcales	s__unclassified_o__Myxococcales	OTU1038	0	0	0	21	12	2	0	0	0	0	0	0	0	0	0	0	0	0	0	0	0	0	0	0	0	0	0	0	0	0	0	0	0	0	0	0	0	0	35
d__Bacteria	k__norank	p__Proteobacteria	c__Gammaproteobacteria	o__Xanthomonadales	f__Xanthomonadaceae	g__Dyella	s__uncultured_Dyella_sp._g__Dyella	OTU830	0	1	0	0	8	0	6	0	0	1	0	0	0	1	0	0	0	0	0	0	1	0	5	0	0	0	0	0	0	0	0	0	0	0	0	0	3	0	26
d__Bacteria	k__norank	p__Proteobacteria	c__Betaproteobacteria	o__Nitrosomonadales	f__Nitrosomonadaceae	g__norank_f__Nitrosomonadaceae	s__unclassified_g__norank_f__Nitrosomonadaceae	OTU513	0	0	20	0	0	0	0	0	0	0	0	0	0	0	0	0	0	0	0	0	0	0	0	0	0	0	0	0	0	0	0	0	0	0	0	0	0	0	20
d__Bacteria	k__norank	p__Proteobacteria	c__Gammaproteobacteria	o__Cellvibrionales	f__Halieaceae	g__OM60_NOR5__clade	s__uncultured_soil_bacterium_g__OM60_NOR5__clade	OTU1965	8	0	0	0	0	0	0	2	0	0	0	0	0	0	0	0	0	0	50	47	35	43	23	11	6	6	9	21	0	0	0	0	0	0	0	0	0	0	261
d__Bacteria	k__norank	p__Firmicutes	c__Clostridia	o__Clostridiales	f__Lachnospiraceae	g__Marvinbryantia	s__uncultured_bacterium_g__Marvinbryantia	OTU495	0	0	13	0	0	2	0	0	0	0	0	0	0	0	0	0	0	0	0	0	0	0	0	0	0	0	0	0	0	0	0	0	0	0	0	0	0	0	15
d__Bacteria	k__norank	p__Proteobacteria	c__Gammaproteobacteria	o__Xanthomonadales	f__Xanthomonadaceae	g__Arenimonas	s__unclassified_g__Arenimonas	OTU588	0	0	4	0	0	0	0	2	0	0	0	0	0	0	0	0	0	0	0	0	0	0	0	0	0	0	0	0	0	0	0	0	0	0	0	0	0	0	6
d__Bacteria	k__norank	p__Gemmatimonadetes	c__Gemmatimonadetes	o__Gemmatimonadales	f__Gemmatimonadaceae	g__Gemmatimonas	s__uncultured_bacterium_g__Gemmatimonas	OTU327	0	0	5	0	0	0	0	0	0	0	0	0	0	0	0	0	0	0	0	0	0	0	0	0	0	0	0	0	0	0	0	0	0	0	0	0	0	0	5
d__Bacteria	k__norank	p__Proteobacteria	c__Gammaproteobacteria	o__Cellvibrionales	f__Halieaceae	g__Haliea	s__unclassified_g__Haliea	OTU1724	0	0	15	0	4	0	0	0	0	0	4	0	0	0	0	0	0	0	42	82	8	43	32	8	5	3	11	18	0	0	0	0	1	0	0	0	0	0	276
d__Bacteria	k__norank	p__Firmicutes	c__Bacilli	o__Bacillales	f__Bacillaceae	g__Bacillus	s__unclassified_g__Bacillus	OTU1360	0	1	0	9	26	15	1	0	0	1411	427	6	0	0	0	0	1	0	0	1	0	0	0	0	0	0	0	1	0	0	0	0	1	5	37	5	332	19	2298
d__Bacteria	k__norank	p__Firmicutes	c__Bacilli	o__Bacillales	f__Bacillaceae	g__Bacillus	s__unclassified_g__Bacillus	OTU1363	4	3	14	15	55	13	0	0	1	4	0	0	0	0	2	0	0	0	0	2	0	0	0	0	0	0	0	0	0	0	0	0	0	0	0	0	2	0	115
d__Bacteria	k__norank	p__Firmicutes	c__Clostridia	o__Clostridiales	f__Ruminococcaceae	g__Papillibacter	s__uncultured_bacterium_g__Papillibacter	OTU933	0	0	19	32	113	11	0	2	0	0	0	0	0	0	0	0	0	0	0	0	0	0	0	0	0	0	0	0	0	0	0	0	0	0	0	0	0	0	177
d__Bacteria	k__norank	p__Cyanobacteria	c__Cyanobacteria	o__SubsectionII	f__FamilyII_o__SubsectionII	g__Pleurocapsa	s__unclassified_g__Pleurocapsa	OTU2082	0	0	0	0	0	0	0	0	0	0	0	0	0	0	0	0	0	0	0	0	0	0	0	0	0	0	0	0	0	4	0	2	15	0	0	0	0	0	21
d__Bacteria	k__norank	p__Proteobacteria	c__Alphaproteobacteria	o__Rickettsiales	f__Anaplasmataceae	g__Candidatus_Xenohaliotis	s__uncultured_bacterium_g__Candidatus_Xenohaliotis	OTU724	0	0	0	165	11	0	0	0	0	0	0	0	0	4	0	0	0	0	0	0	0	0	0	0	0	0	0	0	3	0	0	0	0	0	0	0	0	0	183
d__Bacteria	k__norank	p__Bacteroidetes	c__Bacteroidia	o__Bacteroidales	f__Rikenellaceae	g__Rikenellaceae_RC9_gut_group	s__unclassified_g__Rikenellaceae_RC9_gut_group	OTU630	0	0	0	14	0	1	0	0	0	0	0	0	0	0	0	0	0	0	0	0	0	0	0	0	0	0	0	0	0	0	0	0	0	0	0	0	0	0	15
d__Bacteria	k__norank	p__Bacteroidetes	c__Bacteroidia	o__Bacteroidales	f__Rikenellaceae	g__Rikenellaceae_RC9_gut_group	s__unclassified_g__Rikenellaceae_RC9_gut_group	OTU631	0	0	7	11	7	8	0	0	0	0	0	0	0	0	0	0	0	0	0	0	0	0	0	0	0	0	0	0	0	0	0	0	0	0	0	0	0	0	33
d__Bacteria	k__norank	p__Chloroflexi	c__SJA-68	o__norank_c__SJA-68	f__norank_c__SJA-68	g__norank_c__SJA-68	s__uncultured_bacterium_SJA-68	OTU157	13	0	0	0	0	0	0	0	0	0	0	0	0	0	0	0	0	0	0	0	0	0	0	0	0	0	0	0	0	0	0	0	0	0	0	0	0	0	13
d__Bacteria	k__norank	p__Bacteroidetes	c__Sphingobacteriia	o__Sphingobacteriales	f__Chitinophagaceae	g__Sediminibacterium	s__unclassified_g__Sediminibacterium	OTU53	11	4	0	0	0	0	4	2	0	0	0	0	0	0	0	0	0	0	0	0	0	0	0	0	0	0	0	0	0	0	0	0	0	0	0	0	0	0	21
d__Bacteria	k__norank	p__Tenericutes	c__Mollicutes	o__Mollicutes_RF9	f__norank_o__Mollicutes_RF9	g__norank_o__Mollicutes_RF9	s__uncultured_bacterium_g__norank_o__Mollicutes_RF9	OTU1233	0	0	0	0	0	12	0	0	0	0	0	0	0	0	0	0	0	0	0	0	0	0	0	0	0	0	0	0	0	0	0	0	0	0	0	0	0	0	12
d__Bacteria	k__norank	p__Proteobacteria	c__Betaproteobacteria	o__Burkholderiales	f__Oxalobacteraceae	g__Massilia	s__unclassified_g__Massilia	OTU121	24	0	0	0	0	0	0	0	0	0	0	0	0	0	0	0	0	0	0	0	0	0	0	0	0	0	0	0	0	0	0	0	0	0	0	0	0	0	24
d__Bacteria	k__norank	p__Firmicutes	c__Erysipelotrichia	o__Erysipelotrichales	f__Erysipelotrichaceae	g__Erysipelotrichaceae_UCG-004	s__unclassified_g__Erysipelotrichaceae_UCG-004	OTU383	0	23	31	24	2	13	0	0	0	0	0	0	0	0	0	0	0	0	0	0	0	0	0	0	0	0	0	0	0	0	0	0	0	0	0	0	0	0	93
d__Bacteria	k__norank	p__Proteobacteria	c__Alphaproteobacteria	o__Sphingomonadales	f__Erythrobacteraceae	g__unclassified_f__Erythrobacteraceae	s__unclassified_f__Erythrobacteraceae	OTU610	0	0	13	0	0	0	0	0	0	0	0	0	0	0	0	0	0	0	0	0	0	0	0	0	0	0	0	0	0	0	0	0	0	0	0	0	0	0	13
d__Bacteria	k__norank	p__Proteobacteria	c__Alphaproteobacteria	o__Rhizobiales	f__MNG7	g__norank_f__MNG7	s__unclassified_g__norank_f__MNG7	OTU1851	0	8	0	0	1	2	0	1	0	1	0	0	0	1	0	0	0	0	2	3	2	3	7	1	1	1	3	0	1	2	0	1	34	0	0	0	0	0	75
d__Bacteria	k__norank	p__SBR1093	c__norank_p__SBR1093	o__norank_p__SBR1093	f__norank_p__SBR1093	g__norank_p__SBR1093	s__uncultured_soil_bacterium_g__norank_p__SBR1093	OTU160	0	19	0	0	0	0	0	0	0	0	0	0	0	1	0	0	0	0	1	0	0	0	0	0	0	0	0	0	0	0	0	0	4	0	0	0	1	0	26
d__Bacteria	k__norank	p__Acidobacteria	c__Acidobacteria	o__Subgroup_7	f__norank_o__Subgroup_7	g__norank_o__Subgroup_7	s__unclassified_g__norank_o__Subgroup_7	OTU459	0	0	9	0	0	0	0	0	0	0	0	0	0	0	0	0	0	0	0	0	0	0	0	0	0	0	0	0	0	0	0	0	0	0	0	0	0	0	9
d__Bacteria	k__norank	p__Acidobacteria	c__Acidobacteria	o__norank_c__Acidobacteria	f__norank_c__Acidobacteria	g__norank_c__Acidobacteria	s__unclassified_g__norank_c__Acidobacteria	OTU354	0	0	5	0	0	0	0	0	0	0	0	0	0	0	0	0	0	0	0	0	0	0	0	0	0	0	0	0	0	0	0	0	0	0	0	0	0	0	5
d__Bacteria	k__norank	p__Bacteroidetes	c__Bacteroidia	o__Bacteroidales	f__Prevotellaceae	g__Prevotellaceae_UCG-003	s__unclassified_g__Prevotellaceae_UCG-003	OTU833	0	0	2	0	16	14	0	0	0	0	0	0	0	0	0	0	0	0	0	0	0	0	0	0	0	0	0	0	0	0	0	0	0	0	0	0	0	0	32
d__Bacteria	k__norank	p__Proteobacteria	c__Deltaproteobacteria	o__Deltaproteobacteria_Incertae_Sedis	f__Syntrophorhabdaceae	g__Syntrophorhabdus	s__uncultured_Syntrophorhabdaceae_bacterium	OTU1760	0	0	0	0	0	0	0	1	0	0	0	0	0	0	0	0	0	0	19	14	11	14	10	4	2	7	3	1	0	5	0	0	6	0	0	0	0	0	97
d__Bacteria	k__norank	p__Bacteroidetes	c__Bacteroidia	o__Bacteroidales	f__Porphyromonadaceae	g__Porphyromonas	s__unclassified_g__Porphyromonas	OTU1096	0	0	0	0	0	22	0	0	0	0	0	0	0	0	0	0	0	0	0	0	0	0	0	0	0	0	0	0	0	0	0	0	0	0	0	0	0	0	22
d__Bacteria	k__norank	p__Bacteroidetes	c__Bacteroidia	o__Bacteroidales	f__Bacteroidales_BS11_gut_group	g__norank_f__Bacteroidales_BS11_gut_group	s__uncultured_rumen_bacterium_g__norank_f__Bacteroidales_BS11_gut_group	OTU1118	0	0	0	6	23	18	0	0	0	0	0	0	0	0	0	0	0	0	0	0	0	0	0	0	0	0	0	0	0	0	0	0	0	0	0	0	0	0	47
d__Bacteria	k__norank	p__Chlorobi	c__Chlorobia	o__Chlorobiales	f__Chlorobiaceae	g__Chlorobaculum	s__unclassified_g__Chlorobaculum	OTU374	0	0	28	0	0	0	0	0	0	0	0	0	0	0	0	0	0	0	0	0	0	0	0	0	0	0	0	0	0	0	0	0	0	0	0	0	0	0	28
d__Bacteria	k__norank	p__Firmicutes	c__Erysipelotrichia	o__Erysipelotrichales	f__Erysipelotrichaceae	g__Erysipelotrichaceae_UCG-004	s__uncultured_rumen_bacterium_g__Erysipelotrichaceae_UCG-004	OTU498	0	0	25	0	0	0	0	0	0	0	0	0	0	0	0	0	0	0	0	0	0	0	0	0	0	0	0	0	0	0	0	0	0	0	0	0	0	0	25
d__Bacteria	k__norank	p__Spirochaetae	c__Spirochaetes	o__Spirochaetales	f__PL-11B10	g__norank_f__PL-11B10	s__uncultured_rumen_bacterium_g__norank_f__PL-11B10	OTU785	0	0	0	0	26	0	0	0	0	0	0	0	0	0	0	0	0	0	0	0	0	0	0	0	0	0	0	0	0	0	0	0	0	0	0	0	0	0	26
d__Bacteria	k__norank	p__Firmicutes	c__Bacilli	o__unclassified_c__Bacilli	f__unclassified_c__Bacilli	g__unclassified_c__Bacilli	s__unclassified_c__Bacilli	OTU1563	0	0	0	0	0	0	0	0	0	0	0	0	0	0	0	0	0	0	10	49	15	30	17	6	3	17	5	11	0	0	0	0	0	0	0	0	0	0	163
d__Bacteria	k__norank	p__Bacteroidetes	c__Bacteroidia	o__Bacteroidales	f__Bacteroidaceae	g__Bacteroides	s__Bacteroidaceae_bacterium_MS4	OTU1780	0	0	0	0	0	0	0	0	0	0	0	0	0	0	0	0	0	0	0	0	2	186	38	0	0	0	0	0	37	0	0	0	0	0	0	0	0	0	263
d__Bacteria	k__norank	p__Cyanobacteria	c__Cyanobacteria	o__norank_c__Cyanobacteria	f__norank_c__Cyanobacteria	g__norank_c__Cyanobacteria	s__unclassified_g__norank_c__Cyanobacteria	OTU1447	0	0	0	0	0	0	0	0	0	0	0	0	0	0	0	0	0	0	2	3	0	1	0	0	0	0	0	0	0	0	0	0	0	0	0	0	0	0	6
d__Bacteria	k__norank	p__Cyanobacteria	c__Cyanobacteria	o__norank_c__Cyanobacteria	f__norank_c__Cyanobacteria	g__norank_c__Cyanobacteria	s__unclassified_g__norank_c__Cyanobacteria	OTU1443	0	0	0	0	0	0	0	0	0	0	0	0	0	0	0	0	0	0	56	32	34	13	10	13	6	11	1	5	0	0	0	0	0	0	0	0	0	0	181
d__Bacteria	k__norank	p__Cyanobacteria	c__Cyanobacteria	o__norank_c__Cyanobacteria	f__norank_c__Cyanobacteria	g__norank_c__Cyanobacteria	s__unclassified_g__norank_c__Cyanobacteria	OTU1440	0	0	0	0	0	0	0	0	0	0	0	0	0	0	0	0	0	0	28	12	32	9	6	13	3	8	2	2	0	0	0	0	0	0	0	0	0	0	115
d__Bacteria	k__norank	p__Cyanobacteria	c__Cyanobacteria	o__SubsectionI	f__FamilyI_o__SubsectionI	g__Synechococcus	s__unclassified_g__Synechococcus	OTU1428	0	0	0	0	0	0	0	0	0	0	2	0	0	0	0	0	0	0	33	23	36	7	10	23	0	2	1	4	0	1	0	0	0	0	0	0	0	0	142
d__Bacteria	k__norank	p__Latescibacteria	c__norank_p__Latescibacteria	o__norank_p__Latescibacteria	f__norank_p__Latescibacteria	g__norank_p__Latescibacteria	s__uncultured_soil_bacterium_g__norank_p__Latescibacteria	OTU30	31	0	0	0	0	0	0	0	0	0	0	0	0	0	0	0	0	0	0	0	0	0	0	0	0	0	0	0	0	0	0	0	0	0	0	0	0	0	31
d__Bacteria	k__norank	p__Acidobacteria	c__Acidobacteria	o__norank_c__Acidobacteria	f__norank_c__Acidobacteria	g__norank_c__Acidobacteria	s__uncultured_Acidobacteria_bacterium_g__norank_c__Acidobacteria	OTU1736	0	0	0	0	0	0	0	0	0	0	0	0	0	0	0	0	0	0	0	1	0	2	0	1	0	0	0	0	0	0	0	0	0	0	0	0	0	0	4
d__Bacteria	k__norank	p__Firmicutes	c__Clostridia	o__Clostridiales	f__Ruminococcaceae	g__Oscillibacter	s__unclassified_g__Oscillibacter	OTU751	0	0	0	6	0	0	0	0	0	0	0	0	0	0	0	0	0	0	0	0	0	0	0	0	0	0	0	0	0	0	0	0	0	0	0	0	0	0	6
d__Bacteria	k__norank	p__Firmicutes	c__Clostridia	o__Clostridiales	f__Ruminococcaceae	g__Ruminococcaceae_UCG-010	s__uncultured_rumen_bacterium_g__Ruminococcaceae_UCG-010	OTU406	0	0	10	0	0	0	0	2	0	0	0	0	0	0	0	0	0	0	0	0	0	0	0	0	0	0	0	0	0	0	0	0	0	0	0	0	0	0	12
d__Bacteria	k__norank	p__Cyanobacteria	c__Cyanobacteria	o__SubsectionI	f__FamilyI_o__SubsectionI	g__Synechococcus	s__unclassified_g__Synechococcus	OTU1425	0	0	0	0	0	1	0	0	0	0	0	0	0	0	0	0	0	0	398	276	285	126	117	191	23	61	9	114	1	0	0	0	0	0	0	0	0	0	1602
d__Bacteria	k__norank	p__Chloroflexi	c__Anaerolineae	o__Anaerolineales	f__Anaerolineaceae	g__norank_f__Anaerolineaceae	s__unclassified_g__norank_f__Anaerolineaceae	OTU1993	0	0	0	0	0	0	0	0	0	0	0	0	0	0	0	0	0	0	3	3	6	1	7	0	0	2	0	2	0	0	0	0	0	0	0	0	0	0	24
d__Bacteria	k__norank	p__Proteobacteria	c__Alphaproteobacteria	o__Rhodobacterales	f__Rhodobacteraceae	g__unclassified_f__Rhodobacteraceae	s__unclassified_f__Rhodobacteraceae	OTU1721	1	0	0	0	3	0	0	0	0	0	0	0	0	0	0	0	0	0	2	8	7	5	4	3	0	2	2	0	0	1	0	0	1	0	0	0	0	0	39
d__Bacteria	k__norank	p__Firmicutes	c__Clostridia	o__Clostridiales	f__Ruminococcaceae	g__[Eubacterium]_coprostanoligenes_group	s__unclassified_g__[Eubacterium]_coprostanoligenes_group	OTU1027	0	0	0	0	32	0	0	0	0	0	0	0	0	0	0	0	0	0	0	0	0	0	0	0	0	0	0	0	0	0	0	0	0	0	0	0	0	0	32
d__Bacteria	k__norank	p__Chloroflexi	c__KD4-96	o__norank_c__KD4-96	f__norank_c__KD4-96	g__norank_c__KD4-96	s__uncultured_bacterium_g__norank_c__KD4-96	OTU1552	0	0	0	0	0	0	0	0	0	0	0	0	0	0	0	0	0	0	14	13	31	3	5	5	1	4	0	5	0	0	1	0	0	0	0	0	0	0	82
d__Bacteria	k__norank	p__Proteobacteria	c__Gammaproteobacteria	o__Vibrionales	f__Vibrionaceae	g__unclassified_f__Vibrionaceae	s__unclassified_f__Vibrionaceae	OTU1544	0	0	0	0	0	0	0	0	0	0	0	0	0	0	0	0	0	0	0	9	8	12	11	0	14	3	13	1	0	0	0	0	0	0	0	0	0	0	71
d__Bacteria	k__norank	p__Proteobacteria	c__Betaproteobacteria	o__Burkholderiales	f__Comamonadaceae	g__unclassified_f__Comamonadaceae	s__unclassified_f__Comamonadaceae	OTU1286	9	0	0	1	10	0	13	3	0	0	0	0	0	1	0	0	0	0	0	0	0	0	0	0	0	0	0	0	0	2	0	0	0	0	0	0	0	0	39
d__Bacteria	k__norank	p__Planctomycetes	c__Phycisphaerae	o__Tepidisphaerales	f__Tepidisphaeraceae	g__norank_f__Tepidisphaeraceae	s__uncultured_bacterium_g__norank_f__Tepidisphaeraceae	OTU1015	0	0	0	0	10	0	0	0	0	0	0	0	0	0	0	0	0	0	0	0	0	0	0	0	0	0	0	0	0	0	0	0	0	0	0	0	0	0	10
d__Bacteria	k__norank	p__Actinobacteria	c__Actinobacteria	o__Acidimicrobiales	f__Acidimicrobiaceae	g__CL500-29_marine_group	s__uncultured_bacterium_g__CL500-29_marine_group	OTU1668	0	0	0	0	0	0	0	0	0	0	0	0	0	0	0	0	0	0	2	1	11	4	2	1	0	1	0	2	0	0	0	0	4	0	0	0	0	0	28
d__Bacteria	k__norank	p__Firmicutes	c__Clostridia	o__Clostridiales	f__Christensenellaceae	g__Christensenellaceae_R-7_group	s__unclassified_g__Christensenellaceae_R-7_group	OTU812	0	0	0	1	4	0	0	0	0	0	0	0	0	0	0	0	0	0	0	0	0	0	0	0	0	0	0	0	0	0	0	0	0	0	0	0	0	0	5
d__Bacteria	k__norank	p__Actinobacteria	c__Actinobacteria	o__Acidimicrobiales	f__norank_o__Acidimicrobiales	g__norank_o__Acidimicrobiales	s__unclassified_g__norank_o__Acidimicrobiales	OTU378	0	0	16	0	0	0	0	0	0	0	0	0	0	0	0	0	0	0	0	0	0	0	0	0	0	0	0	0	0	0	0	0	0	0	0	0	0	0	16
d__Bacteria	k__norank	p__Bacteroidetes	c__Bacteroidia	o__Bacteroidales	f__Rikenellaceae	g__Blvii28_wastewater-sludge_group	s__uncultured_Bacteroidetes_bacterium_g__Blvii28_wastewater-sludge_group	OTU539	0	0	17	0	0	0	0	0	0	0	0	0	0	0	0	0	0	0	0	0	0	0	0	0	0	0	0	0	0	0	0	0	0	0	0	0	0	0	17
d__Bacteria	k__norank	p__Cyanobacteria	c__Cyanobacteria	o__SubsectionIII	f__FamilyI_o__SubsectionIII	g__unclassified_f__FamilyI_o__SubsectionIII	s__unclassified_f__FamilyI_o__SubsectionIII	OTU1818	0	0	0	0	0	0	0	0	0	0	0	0	0	0	0	0	0	0	1	5	9	0	10	0	0	0	0	0	0	0	0	0	0	0	0	0	0	0	25
d__Bacteria	k__norank	p__Acidobacteria	c__Acidobacteria	o__Solibacterales	f__Solibacteraceae__Subgroup_3_	g__Paludibaculum	s__uncultured_Acidobacteria_bacterium_g__Paludibaculum	OTU163	0	34	0	0	0	0	0	0	0	0	0	0	0	0	0	0	0	0	0	0	0	0	0	0	0	0	0	0	0	0	0	0	0	0	0	0	0	0	34
d__Bacteria	k__norank	p__Firmicutes	c__Clostridia	o__Clostridiales	f__Lachnospiraceae	g__unclassified_f__Lachnospiraceae	s__unclassified_f__Lachnospiraceae	OTU1166	0	0	0	10	1	21	0	0	0	0	0	0	0	0	0	0	0	0	0	0	0	0	0	0	0	0	0	0	0	0	0	0	0	0	0	0	0	0	32
d__Bacteria	k__norank	p__Acidobacteria	c__Acidobacteria	o__norank_c__Acidobacteria	f__norank_c__Acidobacteria	g__norank_c__Acidobacteria	s__unclassified_g__norank_c__Acidobacteria	OTU168	0	13	1	0	0	0	0	0	0	0	0	0	0	0	0	0	0	0	0	0	0	0	0	0	0	0	0	0	0	0	0	0	0	0	0	0	0	0	14
d__Bacteria	k__norank	p__Actinobacteria	c__Actinobacteria	o__Solirubrobacterales	f__0319-6M6	g__norank_f__0319-6M6	s__uncultured_Rubrobacteria_bacterium_g__norank_f__0319-6M6	OTU258	12	13	4	0	0	0	0	0	0	0	0	0	0	0	0	0	0	0	0	0	0	0	0	0	0	0	0	0	0	0	0	0	0	0	0	0	0	0	29
d__Bacteria	k__norank	p__Firmicutes	c__Clostridia	o__Clostridiales	f__Lachnospiraceae	g__Lachnoclostridium_10	s__uncultured_bacterium_g__Lachnoclostridium_10	OTU892	0	2	0	0	17	2	0	0	0	0	0	0	0	0	0	0	0	0	0	0	0	0	0	0	0	0	0	0	0	0	0	0	0	0	0	0	0	0	21
d__Bacteria	k__norank	p__Chloroflexi	c__Anaerolineae	o__Anaerolineales	f__Anaerolineaceae	g__norank_f__Anaerolineaceae	s__uncultured_sludge_bacterium_H5	OTU1350	0	0	0	0	0	0	0	3	0	0	0	0	0	0	0	0	0	0	0	0	2	0	0	0	0	0	0	0	0	0	0	0	0	0	0	0	0	0	5
d__Bacteria	k__norank	p__Acidobacteria	c__Acidobacteria	o__norank_c__Acidobacteria	f__norank_c__Acidobacteria	g__norank_c__Acidobacteria	s__uncultured_proteobacterium_g__norank_c__Acidobacteria	OTU838	0	0	0	0	6	0	0	0	0	0	0	0	0	0	0	0	0	0	0	0	0	0	0	0	0	0	0	0	0	0	0	0	0	0	0	0	0	0	6
d__Bacteria	k__norank	p__Verrucomicrobia	c__LD1-PB3	o__norank_c__LD1-PB3	f__norank_c__LD1-PB3	g__norank_c__LD1-PB3	s__uncultured_bacterium_g__norank_c__LD1-PB3	OTU638	0	0	0	15	28	0	0	0	0	0	0	0	0	0	0	0	0	0	0	0	0	0	0	0	0	0	0	0	0	0	0	0	0	0	0	0	0	0	43
d__Bacteria	k__norank	p__Firmicutes	c__Clostridia	o__Clostridiales	f__Ruminococcaceae	g__Ruminococcaceae_UCG-010	s__uncultured_rumen_bacterium_g__Ruminococcaceae_UCG-010	OTU629	0	0	6	0	0	0	0	0	0	0	0	0	0	0	0	0	0	0	0	0	0	0	0	0	0	0	0	0	0	0	0	0	0	0	0	0	0	0	6
d__Bacteria	k__norank	p__Firmicutes	c__Bacilli	o__Lactobacillales	f__Lactobacillaceae	g__Lactobacillus	s__unclassified_g__Lactobacillus	OTU1669	0	0	9	0	0	3	25	1	0	0	0	1	0	2	0	1	0	0	0	1	16	0	0	1	0	0	0	0	0	0	0	0	2	0	0	0	4	0	66
d__Bacteria	k__norank	p__Chlamydiae	c__Chlamydiae	o__Chlamydiales	f__Parachlamydiaceae	g__Neochlamydia	s__unclassified_g__Neochlamydia	OTU1805	0	0	0	0	0	0	0	0	0	0	0	0	0	0	0	0	0	0	0	3	2	0	4	0	1	1	0	0	0	0	0	0	0	0	0	0	0	0	11
d__Bacteria	k__norank	p__Planctomycetes	c__Planctomycetacia	o__Brocadiales	f__Brocadiaceae	g__Candidatus_Jettenia	s__uncultured_bacterium_g__Candidatus_Jettenia	OTU148	13	0	0	0	0	0	0	0	0	0	0	0	0	0	0	0	0	0	0	0	0	0	0	0	0	0	0	1	0	0	0	0	0	0	0	0	0	0	14
d__Bacteria	k__norank	p__Proteobacteria	c__Betaproteobacteria	o__Burkholderiales	f__Comamonadaceae	g__Comamonas	s__Comamonas_koreensis	OTU1252	6	3	0	18	3	25	1	0	0	3	4	0	0	0	0	0	0	0	0	0	0	0	0	0	0	0	0	0	0	0	0	0	0	0	0	0	0	0	63
d__Bacteria	k__norank	p__Bacteroidetes	c__Cytophagia	o__Cytophagales	f__Cyclobacteriaceae	g__norank_f__Cyclobacteriaceae	s__uncultured_bacterium_g__norank_f__Cyclobacteriaceae	OTU1322	0	0	0	0	0	0	0	12	0	0	0	0	0	0	0	0	0	0	0	0	0	0	0	0	0	0	0	0	0	0	0	0	0	0	0	0	0	0	12
d__Bacteria	k__norank	p__Proteobacteria	c__Deltaproteobacteria	o__Desulfobacterales	f__Desulfobulbaceae	g__Desulfobulbus	s__uncultured_bacterium_g__Desulfobulbus	OTU517	0	0	8	0	0	0	0	0	0	0	0	0	0	0	0	0	0	0	0	0	0	0	0	0	0	0	0	0	0	0	0	0	0	0	0	0	0	0	8
d__Bacteria	k__norank	p__Firmicutes	c__Clostridia	o__Clostridiales	f__Ruminococcaceae	g__Ruminiclostridium_5	s__unclassified_g__Ruminiclostridium_5	OTU623	0	0	18	0	0	0	0	0	0	0	0	0	0	0	0	0	0	0	0	0	0	0	0	0	0	0	0	0	0	0	0	0	0	0	0	0	0	0	18
d__Bacteria	k__norank	p__Proteobacteria	c__Betaproteobacteria	o__SC-I-84	f__norank_o__SC-I-84	g__norank_o__SC-I-84	s__uncultured_bacterium_g__norank_o__SC-I-84	OTU1752	0	0	0	0	0	0	0	0	0	0	0	0	0	0	0	0	0	0	59	64	25	48	18	15	6	6	8	15	0	0	0	0	0	0	0	0	0	0	264
d__Bacteria	k__norank	p__Proteobacteria	c__Alphaproteobacteria	o__Alphaproteobacteria_Incertae_Sedis	f__norank_o__Alphaproteobacteria_Incertae_Sedis	g__norank_o__Alphaproteobacteria_Incertae_Sedis	s__uncultured_Micavibrio_sp._g__norank_o__Alphaproteobacteria_Incertae_Sedis	OTU197	0	2	0	0	0	1	0	2	0	0	0	0	0	0	0	0	0	0	0	0	0	0	0	0	0	0	0	0	0	0	0	0	2	0	0	0	0	0	7
d__Bacteria	k__norank	p__Firmicutes	c__Clostridia	o__Clostridiales	f__Lachnospiraceae	g__Lachnospiraceae_UCG-006	s__uncultured_rumen_bacterium_g__Lachnospiraceae_UCG-006	OTU449	0	0	23	0	1	0	0	0	0	0	0	0	0	0	0	0	0	0	0	0	0	0	0	0	0	0	0	0	0	0	0	0	0	0	0	0	0	0	24
d__Bacteria	k__norank	p__Proteobacteria	c__Gammaproteobacteria	o__Pasteurellales	f__Pasteurellaceae	g__unclassified_f__Pasteurellaceae	s__unclassified_f__Pasteurellaceae	OTU908	0	0	0	0	4	0	0	0	0	0	0	0	0	0	0	0	0	0	0	0	0	0	0	0	0	0	0	0	0	0	0	0	0	0	0	0	0	0	4
d__Bacteria	k__norank	p__Gracilibacteria	c__norank_p__Gracilibacteria	o__norank_p__Gracilibacteria	f__norank_p__Gracilibacteria	g__norank_p__Gracilibacteria	s__uncultured_rumen_bacterium_g__norank_p__Gracilibacteria	OTU924	0	0	0	6	36	75	0	0	0	0	0	0	0	0	0	0	0	0	0	0	0	0	0	0	0	0	0	0	0	0	0	0	0	0	0	0	0	0	117
d__Bacteria	k__norank	p__Proteobacteria	c__Gammaproteobacteria	o__Oceanospirillales	f__Oleiphilaceae	g__Oleiphilus	s__Cipangopaludina_cathayensis	OTU365	22	0	11	0	0	0	0	0	0	0	0	0	0	0	0	0	0	0	0	0	0	0	0	0	0	0	0	0	0	0	0	0	0	0	0	0	0	0	33
d__Bacteria	k__norank	p__Firmicutes	c__Clostridia	o__Clostridiales	f__Lachnospiraceae	g__Cellulosilyticum	s__unclassified_g__Cellulosilyticum	OTU1912	0	0	0	0	0	0	0	0	0	0	0	0	0	0	0	0	0	0	4	10	6	9	2	1	0	4	0	4	0	4	0	0	2	0	0	0	0	0	46
d__Bacteria	k__norank	p__Gemmatimonadetes	c__Gemmatimonadetes	o__Gemmatimonadales	f__Gemmatimonadaceae	g__Gemmatirosa	s__uncultured_bacterium_g__Gemmatirosa	OTU173	0	36	0	0	0	0	0	0	0	0	0	0	0	0	0	0	0	0	0	0	0	0	0	0	0	0	0	0	0	0	0	0	0	0	0	0	0	0	36
d__Bacteria	k__norank	p__Bacteroidetes	c__Bacteroidia	o__Bacteroidales	f__Bacteroidales_S24-7_group	g__norank_f__Bacteroidales_S24-7_group	s__uncultured_bacterium_g__norank_f__Bacteroidales_S24-7_group	OTU576	1	0	34	0	1	0	0	0	0	0	0	0	0	1	0	0	2	0	0	0	0	0	0	0	0	0	0	0	0	0	0	0	0	0	0	0	0	0	39
d__Bacteria	k__norank	p__Firmicutes	c__Clostridia	o__Clostridiales	f__Lachnospiraceae	g__Coprococcus_1	s__uncultured_bacterium_g__Coprococcus_1	OTU1210	0	0	13	0	0	5	0	0	0	0	0	0	0	0	0	0	0	0	0	0	0	0	0	0	0	0	0	0	0	0	0	0	0	0	0	0	0	0	18
d__Bacteria	k__norank	p__Actinobacteria	c__Actinobacteria	o__Gaiellales	f__Gaiellaceae	g__Gaiella	s__unclassified_g__Gaiella	OTU347	9	0	4	1	0	0	0	0	0	0	0	0	0	0	0	0	0	0	0	0	0	0	0	0	0	0	0	0	0	0	0	0	0	0	0	0	0	0	14
d__Bacteria	k__norank	p__Proteobacteria	c__Alphaproteobacteria	o__Rhizobiales	f__Methylobacteriaceae	g__Meganema	s__uncultured_alpha_proteobacterium_g__Meganema	OTU2035	0	0	0	0	0	1	0	0	0	0	0	0	0	1	0	0	0	0	0	0	0	0	0	0	0	0	0	1	1	3	0	2	53	0	0	0	1	0	63
d__Bacteria	k__norank	p__Bacteroidetes	c__Flavobacteriia	o__Flavobacteriales	f__Flavobacteriaceae	g__Bergeyella	s__unclassified_g__Bergeyella	OTU884	0	0	0	0	24	0	0	0	0	0	0	0	0	0	0	0	0	0	0	0	0	0	0	0	0	0	0	0	0	0	0	0	0	0	0	0	0	0	24
d__Bacteria	k__norank	p__Proteobacteria	c__Gammaproteobacteria	o__Methylococcales	f__Methylococcaceae	g__Methyloparacoccus	s__uncultured_bacterium_g__Methyloparacoccus	OTU2053	0	0	0	1	0	1	17	42	0	0	0	0	0	0	0	0	0	0	0	0	0	0	0	0	0	0	0	0	2	5	0	1	8	0	0	0	0	0	77
d__Bacteria	k__norank	p__Spirochaetae	c__Spirochaetes	o__Spirochaetales	f__Spirochaetaceae	g__Sphaerochaeta	s__unclassified_g__Sphaerochaeta	OTU271	0	12	10	18	21	32	0	0	0	0	0	0	0	0	0	0	0	0	0	0	0	0	0	0	0	0	0	0	0	0	0	0	0	0	0	0	0	0	93
d__Bacteria	k__norank	p__Chloroflexi	c__Anaerolineae	o__Anaerolineales	f__Anaerolineaceae	g__norank_f__Anaerolineaceae	s__unclassified_g__norank_f__Anaerolineaceae	OTU1621	0	0	0	0	0	0	0	0	0	0	0	0	0	0	0	0	0	0	0	3	7	0	0	0	0	0	0	0	0	0	0	0	0	0	0	0	0	0	10
d__Bacteria	k__norank	p__Tenericutes	c__Mollicutes	o__Mollicutes_RF9	f__norank_o__Mollicutes_RF9	g__norank_o__Mollicutes_RF9	s__uncultured_bacterium_g__norank_o__Mollicutes_RF9	OTU918	0	0	0	0	59	1	0	0	0	0	0	0	0	0	0	0	0	0	0	0	0	0	0	0	0	0	0	0	0	0	0	0	0	0	0	0	0	0	60
d__Bacteria	k__norank	p__Proteobacteria	c__Betaproteobacteria	o__Neisseriales	f__Neisseriaceae	g__Vogesella	s__uncultured_prokaryote_g__Vogesella	OTU1505	0	0	0	0	0	0	0	0	0	0	0	0	0	0	0	0	0	0	5	8	8	8	2	1	3	0	1	0	0	0	0	1	1	0	0	0	0	0	38
d__Bacteria	k__norank	p__Bacteroidetes	c__Bacteroidia	o__Bacteroidales	f__Marinilabiaceae	g__norank_f__Marinilabiaceae	s__uncultured_rumen_bacterium_g__norank_f__Marinilabiaceae	OTU993	0	0	0	1	13	14	0	0	0	0	0	0	0	0	0	0	0	0	0	0	0	0	0	0	0	0	0	0	0	0	0	0	0	0	0	0	0	0	28
d__Bacteria	k__norank	p__Proteobacteria	c__Gammaproteobacteria	o__Xanthomonadales	f__Xanthomonadaceae	g__Arenimonas	s__unclassified_g__Arenimonas	OTU1104	30	0	0	5	0	3	0	0	0	0	1	0	0	0	0	0	0	0	0	3	0	1	6	0	1	0	1	0	0	0	0	0	0	0	0	0	0	0	51
d__Bacteria	k__norank	p__Firmicutes	c__Clostridia	o__Clostridiales	f__Lachnospiraceae	g__norank_f__Lachnospiraceae	s__uncultured_rumen_bacterium_g__norank_f__Lachnospiraceae	OTU1008	0	36	31	44	232	29	0	0	0	0	0	0	0	0	0	0	0	0	0	0	0	0	0	0	0	0	0	0	0	0	0	0	0	0	0	0	0	0	372
d__Bacteria	k__norank	p__Verrucomicrobia	c__WCHB1-41	o__norank_c__WCHB1-41	f__norank_c__WCHB1-41	g__norank_c__WCHB1-41	s__uncultured_rumen_bacterium_g__norank_c__WCHB1-41	OTU969	0	2	31	6	19	1	0	0	0	0	0	0	0	0	0	0	0	0	0	0	0	0	0	0	0	0	0	0	0	0	0	0	0	0	0	0	0	0	59
d__Bacteria	k__norank	p__Firmicutes	c__Clostridia	o__Clostridiales	f__Lachnospiraceae	g__Coprococcus_3	s__unclassified_g__Coprococcus_3	OTU486	23	0	20	0	22	0	0	0	0	0	0	0	0	0	0	0	0	0	0	1	0	0	0	0	0	0	0	0	0	0	0	0	0	0	0	0	0	0	66
d__Bacteria	k__norank	p__Verrucomicrobia	c__WCHB1-41	o__norank_c__WCHB1-41	f__norank_c__WCHB1-41	g__norank_c__WCHB1-41	s__uncultured_rumen_bacterium_g__norank_c__WCHB1-41	OTU964	0	0	0	0	4	3	0	0	0	0	0	0	0	0	0	0	0	0	0	0	0	0	0	0	0	0	0	0	0	0	0	0	0	0	0	0	0	0	7
d__Bacteria	k__norank	p__Bacteroidetes	c__Bacteroidia	o__Bacteroidales	f__Bacteroidales_S24-7_group	g__norank_f__Bacteroidales_S24-7_group	s__uncultured_bacterium_g__norank_f__Bacteroidales_S24-7_group	OTU377	0	0	11	0	0	0	0	0	0	0	0	0	0	0	0	0	0	0	0	0	0	0	0	0	0	0	0	0	0	0	0	0	0	0	0	0	0	0	11
d__Bacteria	k__norank	p__Firmicutes	c__Clostridia	o__Clostridiales	f__Ruminococcaceae	g__Ruminococcaceae_UCG-010	s__bacterium_enrichment_culture_clone_BBMC-9	OTU496	0	0	22	0	0	3	0	0	0	0	0	0	0	0	0	0	0	0	0	0	0	0	0	0	0	0	0	0	0	0	0	0	0	0	0	0	0	0	25
d__Bacteria	k__norank	p__Proteobacteria	c__Gammaproteobacteria	o__Xanthomonadales	f__Xanthomonadaceae	g__Arenimonas	s__Aquimonas_sp._BUT-1	OTU1347	0	0	0	0	0	0	0	2	0	0	0	0	0	0	0	0	0	0	0	0	0	0	0	0	0	0	0	0	0	0	0	0	0	0	0	0	0	0	2
d__Bacteria	k__norank	p__Lentisphaerae	c__Oligosphaeria	o__Oligosphaerales	f__Oligosphaeraceae	g__Z20	s__uncultured_bacterium_g__Z20	OTU1032	0	0	0	7	49	0	0	0	0	0	0	0	0	0	0	0	0	0	0	0	0	0	0	0	0	0	0	0	0	0	0	0	0	0	0	0	0	0	56
d__Bacteria	k__norank	p__Actinobacteria	c__Actinobacteria	o__Propionibacteriales	f__Nocardioidaceae	g__Nocardioides	s__unclassified_g__Nocardioides	OTU2078	10	0	0	0	0	2	5	8	0	0	7	0	0	0	0	0	0	0	1	0	2	0	0	0	0	0	0	1	6	23	0	3	102	0	0	0	0	0	170
d__Bacteria	k__norank	p__Firmicutes	c__Clostridia	o__Clostridiales	f__Lachnospiraceae	g__Blautia	s__unclassified_g__Blautia	OTU967	0	0	0	32	28	0	0	0	0	0	0	0	0	0	0	0	0	0	0	0	0	1	0	0	0	0	0	0	0	0	0	0	1	0	0	0	0	0	62
d__Bacteria	k__norank	p__Saccharibacteria	c__norank_p__Saccharibacteria	o__norank_p__Saccharibacteria	f__norank_p__Saccharibacteria	g__norank_p__Saccharibacteria	s__uncultured_bacterium_g__norank_p__Saccharibacteria	OTU2026	0	0	0	0	0	0	0	0	0	0	0	0	0	0	0	0	0	0	0	0	0	0	0	0	0	0	0	0	6	4	0	18	92	0	0	0	0	0	120
d__Bacteria	k__norank	p__Chloroflexi	c__Anaerolineae	o__Anaerolineales	f__Anaerolineaceae	g__norank_f__Anaerolineaceae	s__uncultured_prokaryote_g__norank_f__Anaerolineaceae	OTU1662	0	0	0	0	0	0	0	0	0	0	0	0	0	0	0	0	0	0	6	5	7	1	2	0	0	0	0	0	0	0	0	0	0	0	0	0	0	0	21
d__Bacteria	k__norank	p__Proteobacteria	c__Alphaproteobacteria	o__Sphingomonadales	f__Sphingomonadaceae	g__Sphingomonas	s__unclassified_g__Sphingomonas	OTU479	0	0	33	2	0	0	2	0	0	0	1	0	0	0	0	0	0	0	0	0	0	0	3	0	0	0	0	0	0	0	0	2	1	0	0	0	0	0	44
d__Bacteria	k__norank	p__Verrucomicrobia	c__WCHB1-41	o__norank_c__WCHB1-41	f__norank_c__WCHB1-41	g__norank_c__WCHB1-41	s__uncultured_rumen_bacterium_g__norank_c__WCHB1-41	OTU711	0	0	0	9	24	0	0	0	0	0	0	0	0	0	0	0	0	0	0	0	0	0	0	0	0	0	0	0	0	0	0	0	0	0	0	0	0	0	33
d__Bacteria	k__norank	p__Bacteroidetes	c__Bacteroidia	o__Bacteroidales	f__Prevotellaceae	g__unclassified_f__Prevotellaceae	s__unclassified_f__Prevotellaceae	OTU1196	0	0	17	37	54	30	0	0	0	0	0	0	0	0	0	0	0	0	0	0	0	0	0	0	0	0	0	0	0	0	0	0	0	0	0	0	0	0	138
d__Bacteria	k__norank	p__Proteobacteria	c__Gammaproteobacteria	o__Methylococcales	f__Methylococcaceae	g__Methyloparacoccus	s__unclassified_g__Methyloparacoccus	OTU1291	0	0	0	0	0	0	2	8	0	0	0	0	0	0	0	0	0	0	0	0	0	0	0	0	0	0	0	0	0	0	0	0	0	0	0	0	0	0	10
d__Bacteria	k__norank	p__Firmicutes	c__Clostridia	o__Clostridiales	f__Clostridiaceae_1	g__Clostridium_sensu_stricto_11	s__uncultured_bacterium_g__Clostridium_sensu_stricto_11	OTU1820	0	0	0	0	0	0	0	0	0	0	0	0	0	0	0	0	0	0	9	3	8	7	7	1	0	4	0	1	0	0	0	0	0	0	0	0	0	0	40
d__Bacteria	k__norank	p__TM6__Dependentiae_	c__norank_p__TM6__Dependentiae_	o__norank_p__TM6__Dependentiae_	f__norank_p__TM6__Dependentiae_	g__norank_p__TM6__Dependentiae_	s__uncultured_bacterium_g__norank_p__TM6__Dependentiae_	OTU2089	0	0	0	0	0	0	0	1	0	0	0	0	0	0	0	0	0	0	0	0	0	0	1	0	2	0	0	0	0	0	0	0	3	0	0	0	0	0	7
d__Bacteria	k__norank	p__Actinobacteria	c__Actinobacteria	o__Gaiellales	f__Gaiellaceae	g__Gaiella	s__uncultured_Rubrobacterales_bacterium_g__Gaiella	OTU1685	0	0	0	0	0	0	0	0	0	0	1	0	0	0	0	0	0	0	1	6	13	2	8	2	1	4	4	1	0	0	0	0	0	0	0	0	0	0	43
d__Bacteria	k__norank	p__Saccharibacteria	c__norank_p__Saccharibacteria	o__norank_p__Saccharibacteria	f__norank_p__Saccharibacteria	g__norank_p__Saccharibacteria	s__uncultured_bacterium_g__norank_p__Saccharibacteria	OTU2084	0	0	0	0	0	0	0	0	0	0	0	0	0	0	0	0	0	0	0	0	0	0	0	0	0	0	0	0	0	0	0	0	32	0	0	0	0	0	32
d__Bacteria	k__norank	p__Bacteroidetes	c__Sphingobacteriia	o__Sphingobacteriales	f__Chitinophagaceae	g__Lacibacter	s__wastewater_metagenome_g__Lacibacter	OTU156	16	0	0	0	0	0	0	0	0	0	0	0	0	0	0	0	0	0	0	0	0	0	0	0	0	0	0	0	0	0	0	0	0	0	0	0	0	0	16
d__Bacteria	k__norank	p__Proteobacteria	c__Betaproteobacteria	o__Burkholderiales	f__Burkholderiaceae	g__Lautropia	s__unclassified_g__Lautropia	OTU1285	0	0	0	0	0	0	2	0	0	0	0	0	0	0	0	0	0	0	0	0	0	0	0	0	0	0	0	0	0	0	0	0	0	0	0	0	0	0	2
d__Bacteria	k__norank	p__Proteobacteria	c__Betaproteobacteria	o__Neisseriales	f__Neisseriaceae	g__unclassified_f__Neisseriaceae	s__unclassified_f__Neisseriaceae	OTU788	0	0	0	0	24	0	0	0	0	0	0	0	0	0	0	0	0	0	0	0	0	0	0	0	0	0	0	0	0	0	0	0	0	0	0	0	0	0	24
d__Bacteria	k__norank	p__Firmicutes	c__Erysipelotrichia	o__Erysipelotrichales	f__Erysipelotrichaceae	g__Erysipelotrichaceae_UCG-004	s__unclassified_g__Erysipelotrichaceae_UCG-004	OTU286	0	0	22	0	0	0	0	0	0	0	0	0	0	0	0	0	0	0	0	0	0	0	0	0	0	0	0	0	0	0	0	0	0	0	0	0	0	0	22
d__Bacteria	k__norank	p__Firmicutes	c__Clostridia	o__Clostridiales	f__Lachnospiraceae	g__unclassified_f__Lachnospiraceae	s__unclassified_f__Lachnospiraceae	OTU758	0	0	0	0	21	0	0	0	0	0	0	0	0	0	0	0	0	0	0	0	0	0	0	0	0	0	0	0	0	0	0	0	0	0	0	0	0	0	21
d__Bacteria	k__norank	p__Firmicutes	c__Clostridia	o__Clostridiales	f__Ruminococcaceae	g__norank_f__Ruminococcaceae	s__uncultured_rumen_bacterium_g__norank_f__Ruminococcaceae	OTU930	0	0	0	0	4	0	0	0	0	0	0	0	0	0	0	0	0	0	0	0	0	0	0	0	0	0	0	0	0	0	0	0	0	0	0	0	0	0	4
d__Bacteria	k__norank	p__Firmicutes	c__Clostridia	o__Clostridiales	f__Ruminococcaceae	g__Anaerotruncus	s__unclassified_g__Anaerotruncus	OTU1126	0	6	0	0	16	4	0	0	0	0	0	0	0	0	0	0	0	0	0	0	0	0	0	0	0	0	0	0	0	0	0	0	0	0	0	0	0	0	26
d__Bacteria	k__norank	p__Proteobacteria	c__Deltaproteobacteria	o__Syntrophobacterales	f__Syntrophobacteraceae	g__Syntrophobacter	s__uncultured_delta_proteobacterium_g__Syntrophobacter	OTU1980	0	0	0	0	0	0	0	0	0	0	0	0	0	0	0	0	0	0	12	11	34	10	17	3	1	6	6	5	0	0	0	0	0	0	0	0	0	0	105
d__Bacteria	k__norank	p__Chloroflexi	c__SJA-68	o__norank_c__SJA-68	f__norank_c__SJA-68	g__norank_c__SJA-68	s__uncultured_bacterium_SJA-68	OTU1611	0	0	0	0	0	0	0	0	0	0	0	0	0	0	0	0	0	0	4	3	11	1	1	1	0	1	0	1	0	0	0	0	0	0	0	0	0	0	23
d__Bacteria	k__norank	p__Bacteroidetes	c__Bacteroidia	o__Bacteroidales	f__Bacteroidales_S24-7_group	g__norank_f__Bacteroidales_S24-7_group	s__uncultured_bacterium_g__norank_f__Bacteroidales_S24-7_group	OTU2159	2	0	0	0	0	0	0	0	0	0	0	0	0	0	0	0	0	0	0	0	0	0	0	0	0	0	0	0	0	0	0	0	0	0	0	0	1	0	3
d__Bacteria	k__norank	p__Firmicutes	c__Clostridia	o__Clostridiales	f__Lachnospiraceae	g__Oribacterium	s__unclassified_g__Oribacterium	OTU167	0	17	0	0	4	3	0	0	0	0	0	0	0	0	0	0	0	0	0	0	0	0	0	0	0	0	0	0	0	0	0	0	0	0	0	0	0	0	24
d__Bacteria	k__norank	p__Fibrobacteres	c__Fibrobacteria	o__Fibrobacterales	f__Fibrobacteraceae	g__Fibrobacter	s__uncultured_rumen_bacterium_g__Fibrobacter	OTU974	0	0	0	5	12	14	0	0	0	0	0	0	0	0	0	0	0	0	0	0	0	0	0	0	0	0	0	0	0	0	0	0	0	0	0	0	0	0	31
d__Bacteria	k__norank	p__Chlamydiae	c__Chlamydiae	o__Chlamydiales	f__Parachlamydiaceae	g__Candidatus_Protochlamydia	s__unclassified_g__Candidatus_Protochlamydia	OTU80	11	0	2	0	0	2	0	0	0	0	0	0	0	0	0	0	0	0	0	0	0	0	0	0	0	0	0	0	0	0	0	0	0	0	0	0	0	0	15
d__Bacteria	k__norank	p__Actinobacteria	c__Actinobacteria	o__Micrococcales	f__Dermatophilaceae	g__unclassified_f__Dermatophilaceae	s__unclassified_f__Dermatophilaceae	OTU2104	0	0	0	0	1	0	3	0	0	0	0	0	0	0	0	0	0	0	0	0	0	0	0	0	0	0	0	0	3	6	0	11	125	0	0	0	0	0	149
d__Bacteria	k__norank	p__Fibrobacteres	c__Fibrobacteria	o__Fibrobacterales	f__Fibrobacteraceae	g__Fibrobacter	s__uncultured_rumen_bacterium_g__Fibrobacter	OTU1197	0	0	85	43	127	76	0	0	0	0	0	0	0	0	0	0	0	0	0	0	0	0	0	0	0	0	0	0	0	0	0	0	0	0	0	0	0	0	331
d__Bacteria	k__norank	p__Cyanobacteria	c__Cyanobacteria	o__norank_c__Cyanobacteria	f__norank_c__Cyanobacteria	g__norank_c__Cyanobacteria	s__unclassified_g__norank_c__Cyanobacteria	OTU226	0	12	0	0	0	0	0	0	0	0	0	0	0	0	0	0	0	0	0	0	0	0	0	0	0	0	0	0	0	0	0	0	0	0	0	0	0	0	12
d__Bacteria	k__norank	p__Proteobacteria	c__Deltaproteobacteria	o__Syntrophobacterales	f__Syntrophobacteraceae	g__Syntrophobacter	s__uncultured_delta_proteobacterium_g__Syntrophobacter	OTU1508	0	0	0	0	0	0	0	0	0	0	0	0	0	0	0	0	0	0	7	7	6	2	4	2	1	1	0	2	0	0	0	0	0	0	0	0	0	0	32
d__Bacteria	k__norank	p__Proteobacteria	c__Betaproteobacteria	o__Burkholderiales	f__Alcaligenaceae	g__Parasutterella	s__uncultured_organism_g__Parasutterella	OTU49	26	0	0	0	0	0	0	0	0	0	0	0	0	0	0	0	0	0	0	0	0	0	0	0	0	0	0	0	0	0	0	0	0	0	0	0	0	0	26
d__Bacteria	k__norank	p__Proteobacteria	c__Gammaproteobacteria	o__Run-SP154	f__norank_o__Run-SP154	g__norank_o__Run-SP154	s__uncultured_bacterium_g__norank_o__Run-SP154	OTU1275	1	0	0	0	0	1	27	96	0	0	1	0	0	0	0	0	0	0	0	0	0	0	0	0	0	0	0	0	0	0	0	0	0	0	0	0	0	0	126
d__Bacteria	k__norank	p__Bacteroidetes	c__Bacteroidia	o__Bacteroidales	f__Prevotellaceae	g__Prevotellaceae_UCG-004	s__unclassified_g__Prevotellaceae_UCG-004	OTU472	0	0	53	11	36	4	0	0	0	0	0	0	0	0	0	0	0	0	0	0	0	0	0	0	0	0	0	0	0	0	0	0	0	0	0	0	0	0	104
d__Bacteria	k__norank	p__Firmicutes	c__Erysipelotrichia	o__Erysipelotrichales	f__Erysipelotrichaceae	g__Erysipelotrichaceae_UCG-004	s__uncultured_rumen_bacterium_g__Erysipelotrichaceae_UCG-004	OTU507	0	5	32	23	24	12	0	0	0	0	0	0	0	0	0	0	0	0	0	0	0	0	0	0	0	0	0	0	0	0	0	0	0	0	0	0	0	0	96
d__Bacteria	k__norank	p__Firmicutes	c__Clostridia	o__Clostridiales	f__Lachnospiraceae	g__Oribacterium	s__uncultured_rumen_bacterium_g__Oribacterium	OTU417	0	0	10	0	0	15	0	0	0	0	0	0	0	0	0	0	0	0	0	0	0	0	0	0	0	0	0	0	0	0	0	0	0	0	0	0	0	0	25
d__Bacteria	k__norank	p__Firmicutes	c__Clostridia	o__Clostridiales	f__Lachnospiraceae	g__Moryella	s__unclassified_g__Moryella	OTU927	0	0	0	0	12	0	0	0	0	0	0	0	0	0	0	0	0	0	0	0	0	0	0	0	0	0	0	0	0	0	0	0	0	0	0	0	0	0	12
d__Bacteria	k__norank	p__Actinobacteria	c__Actinobacteria	o__Propionibacteriales	f__Nocardioidaceae	g__Nocardioides	s__unclassified_g__Nocardioides	OTU1324	17	19	0	2	0	4	5	8	0	0	6	0	0	0	0	0	0	0	0	0	6	0	0	0	0	0	0	0	1	2	0	0	9	0	0	0	0	0	79
d__Bacteria	k__norank	p__Proteobacteria	c__Alphaproteobacteria	o__Rickettsiales	f__Rickettsiales_Incertae_Sedis	g__Candidatus_Odyssella	s__uncultured_bacterium_g__Candidatus_Odyssella	OTU1938	0	0	0	0	0	0	0	0	0	0	0	0	0	0	0	0	0	0	7	10	3	3	3	3	1	2	2	1	0	0	0	0	2	0	0	0	0	0	37
d__Bacteria	k__norank	p__Proteobacteria	c__Deltaproteobacteria	o__Myxococcales	f__Haliangiaceae	g__Haliangium	s__uncultured_Myxococcales_bacterium_g__Haliangium	OTU855	0	0	0	0	7	0	0	0	0	0	0	0	0	0	0	0	0	0	0	0	0	0	0	0	0	0	0	0	0	0	0	0	0	0	0	0	0	0	7
d__Bacteria	k__norank	p__Firmicutes	c__Clostridia	o__Clostridiales	f__Lachnospiraceae	g__Lachnoclostridium_10	s__unclassified_g__Lachnoclostridium_10	OTU970	0	0	118	24	117	45	0	0	0	0	0	0	0	0	0	0	0	0	0	0	0	0	0	0	0	0	0	0	0	0	0	0	0	0	0	0	0	0	304
d__Bacteria	k__norank	p__Proteobacteria	c__Deltaproteobacteria	o__Syntrophobacterales	f__Syntrophaceae	g__Desulfobacca	s__unclassified_g__Desulfobacca	OTU1933	0	0	0	0	0	0	0	0	0	0	0	0	0	0	0	0	0	0	6	11	15	7	2	3	0	8	6	2	0	0	0	0	0	0	0	0	0	0	60
d__Bacteria	k__norank	p__Firmicutes	c__Clostridia	o__Clostridiales	f__Clostridiaceae_1	g__Clostridium_sensu_stricto_3	s__uncultured_soil_bacterium_g__Clostridium_sensu_stricto_3	OTU1534	0	0	0	0	0	0	0	0	0	0	0	0	0	0	0	0	0	0	0	3	3	2	2	2	0	0	0	0	0	0	0	0	0	0	0	0	0	0	12
d__Bacteria	k__norank	p__Bacteroidetes	c__Flavobacteriia	o__Flavobacteriales	f__Flavobacteriaceae	g__Chryseobacterium	s__unclassified_g__Chryseobacterium	OTU93	133	0	0	0	0	0	0	0	0	0	0	0	0	0	0	0	0	0	0	0	0	0	0	0	0	0	0	0	0	0	0	0	0	0	0	0	0	0	133
d__Bacteria	k__norank	p__Chloroflexi	c__Anaerolineae	o__Anaerolineales	f__Anaerolineaceae	g__norank_f__Anaerolineaceae	s__unclassified_g__norank_f__Anaerolineaceae	OTU442	0	0	13	0	0	0	0	0	0	0	0	0	0	0	0	0	0	0	0	0	0	0	0	0	0	0	0	0	0	0	0	0	0	0	0	0	0	0	13
d__Bacteria	k__norank	p__Bacteroidetes	c__Bacteroidia	o__Bacteroidales	f__Rikenellaceae	g__Rikenellaceae_RC9_gut_group	s__uncultured_rumen_bacterium_g__Rikenellaceae_RC9_gut_group	OTU686	0	0	0	19	0	0	0	0	0	0	0	0	0	0	0	0	0	0	0	0	0	0	0	0	0	0	0	0	0	0	0	0	0	0	0	0	0	0	19
d__Bacteria	k__norank	p__Bacteroidetes	c__Bacteroidia	o__Bacteroidales	f__Rikenellaceae	g__Rikenellaceae_RC9_gut_group	s__uncultured_rumen_bacterium_g__Rikenellaceae_RC9_gut_group	OTU683	0	0	0	14	19	11	0	0	0	0	0	0	0	0	0	0	0	0	0	0	0	0	0	0	0	0	0	0	0	0	0	0	0	0	0	0	0	0	44
d__Bacteria	k__norank	p__Proteobacteria	c__Alphaproteobacteria	o__Rhodospirillales	f__Rhodospirillaceae	g__unclassified_f__Rhodospirillaceae	s__unclassified_f__Rhodospirillaceae	OTU1775	0	0	0	0	0	0	0	0	0	0	0	0	0	0	0	0	0	0	0	6	2	4	1	2	1	2	1	1	0	0	0	0	0	0	0	0	0	0	20
d__Bacteria	k__norank	p__Proteobacteria	c__Gammaproteobacteria	o__Xanthomonadales	f__Xanthomonadaceae	g__Dokdonella	s__uncultured_gamma_proteobacterium_g__Dokdonella	OTU20	29	0	0	0	0	0	0	0	0	0	0	0	0	0	0	0	0	0	0	0	0	0	0	0	0	0	0	0	0	0	0	0	0	0	0	0	0	0	29
d__Bacteria	k__norank	p__Bacteroidetes	c__Bacteroidia	o__Bacteroidales	f__Prevotellaceae	g__unclassified_f__Prevotellaceae	s__unclassified_f__Prevotellaceae	OTU563	0	0	14	44	32	12	0	0	0	0	0	0	0	0	0	0	0	0	0	0	0	0	0	0	0	0	0	0	0	0	0	0	0	0	0	0	0	0	102
d__Bacteria	k__norank	p__Actinobacteria	c__Actinobacteria	o__Acidimicrobiales	f__Acidimicrobiaceae	g__CL500-29_marine_group	s__uncultured_Acidimicrobidae_bacterium_g__CL500-29_marine_group	OTU54	25	0	0	0	0	0	0	0	0	0	3	0	0	0	0	0	0	0	0	3	1	0	2	2	0	0	0	1	2	1	0	0	2	0	0	0	0	0	42
d__Bacteria	k__norank	p__Planctomycetes	c__Phycisphaerae	o__Tepidisphaerales	f__Tepidisphaeraceae	g__norank_f__Tepidisphaeraceae	s__unclassified_g__norank_f__Tepidisphaeraceae	OTU621	0	0	17	0	0	0	0	0	0	0	0	0	0	0	0	0	0	0	0	0	0	0	0	0	0	0	0	0	0	0	0	0	0	0	0	0	0	0	17
d__Bacteria	k__norank	p__Chloroflexi	c__Anaerolineae	o__Anaerolineales	f__Anaerolineaceae	g__norank_f__Anaerolineaceae	s__anaerobic_digester_metagenome_g__norank_f__Anaerolineaceae	OTU353	0	0	8	0	0	0	0	0	0	0	0	0	0	0	0	0	0	0	0	0	0	0	0	0	0	0	0	0	0	0	0	0	0	0	0	0	0	0	8
d__Bacteria	k__norank	p__Verrucomicrobia	c__Spartobacteria	o__Chthoniobacterales	f__LD29	g__norank_f__LD29	s__uncultured_bacterium_g__norank_f__LD29	OTU1119	0	0	1	7	0	27	1	39	0	1	0	0	1	5	0	0	0	0	10	10	6	4	6	7	3	1	0	2	1	0	0	0	2	0	0	0	0	0	134
d__Bacteria	k__norank	p__Bacteroidetes	c__Bacteroidia	o__Bacteroidales	f__Prevotellaceae	g__Prevotellaceae_UCG-001	s__unclassified_g__Prevotellaceae_UCG-001	OTU581	0	0	9	0	1	15	0	0	0	0	0	0	0	0	0	0	0	0	0	0	0	0	0	0	0	0	0	0	0	0	0	0	0	0	0	0	0	0	25
d__Bacteria	k__norank	p__unclassified_k__norank	c__unclassified_k__norank	o__unclassified_k__norank	f__unclassified_k__norank	g__unclassified_k__norank	s__unclassified_k__norank	OTU427	0	0	9	0	0	0	0	0	0	0	0	0	0	0	0	0	0	0	0	0	0	0	0	0	0	0	0	0	0	0	0	0	0	0	0	0	0	0	9
d__Bacteria	k__norank	p__Lentisphaerae	c__Lentisphaeria	o__Victivallales	f__vadinBE97	g__norank_f__vadinBE97	s__uncultured_rumen_bacterium_g__norank_f__vadinBE97	OTU829	0	0	0	0	15	6	0	0	0	0	0	0	0	0	0	0	0	0	0	0	0	0	0	0	0	0	0	0	0	0	0	0	0	0	0	0	0	0	21
d__Bacteria	k__norank	p__unclassified_k__norank	c__unclassified_k__norank	o__unclassified_k__norank	f__unclassified_k__norank	g__unclassified_k__norank	s__unclassified_k__norank	OTU428	0	0	13	0	0	0	0	0	0	0	0	0	0	0	0	0	0	0	0	0	0	0	0	0	0	0	0	0	0	0	0	0	0	0	0	0	0	0	13
d__Bacteria	k__norank	p__Firmicutes	c__Clostridia	o__Clostridiales	f__Defluviitaleaceae	g__Defluviitaleaceae_UCG-011	s__uncultured_rumen_bacterium_g__Defluviitaleaceae_UCG-011	OTU429	0	0	16	0	0	0	0	0	0	0	0	0	0	0	0	0	0	0	0	0	0	0	0	0	0	0	0	0	0	0	0	0	0	0	0	0	0	0	16
d__Bacteria	k__norank	p__Actinobacteria	c__Actinobacteria	o__Propionibacteriales	f__Propionibacteriaceae	g__Propioniciclava	s__Propioniciclava_tarda	OTU1328	0	0	0	0	0	0	0	6	0	0	0	0	0	0	0	0	0	0	0	0	0	0	0	0	0	0	0	0	0	4	0	2	77	0	0	0	0	0	89
d__Bacteria	k__norank	p__Bacteroidetes	c__Bacteroidia	o__Bacteroidales	f__Bacteroidales_S24-7_group	g__norank_f__Bacteroidales_S24-7_group	s__unclassified_g__norank_f__Bacteroidales_S24-7_group	OTU589	0	0	10	0	0	0	0	0	0	0	0	0	0	0	0	0	0	0	0	0	0	0	0	0	0	0	0	0	0	0	0	0	0	0	0	0	0	0	10
d__Bacteria	k__norank	p__Bacteroidetes	c__Flavobacteriia	o__Flavobacteriales	f__Flavobacteriaceae	g__Chryseobacterium	s__uncultured_bacterium_g__Chryseobacterium	OTU119	130	45	22	21	0	43	5	3	0	143	352	0	0	0	0	0	0	0	0	0	1	0	1	0	0	0	0	0	0	0	0	0	0	0	0	0	0	0	766
d__Bacteria	k__norank	p__Proteobacteria	c__Deltaproteobacteria	o__Syntrophobacterales	f__Syntrophobacteraceae	g__Desulforhabdus	s__uncultured_bacterium_g__Desulforhabdus	OTU2065	0	0	0	0	0	0	12	4	0	0	0	0	0	0	0	0	0	0	6	1	8	2	5	1	0	2	1	4	6	3	0	2	24	0	0	0	0	0	81
d__Bacteria	k__norank	p__Firmicutes	c__Clostridia	o__Clostridiales	f__Lachnospiraceae	g__Lachnospiraceae_NK4A136_group	s__unclassified_g__Lachnospiraceae_NK4A136_group	OTU953	0	0	5	14	21	0	0	0	0	0	0	0	0	0	0	0	0	0	0	0	0	0	0	0	0	0	0	0	0	0	0	0	0	0	0	0	0	0	40
d__Bacteria	k__norank	p__Proteobacteria	c__Alphaproteobacteria	o__Rhizobiales	f__Bradyrhizobiaceae	g__Bosea	s__unclassified_g__Bosea	OTU1228	0	0	0	0	0	3	0	0	0	0	0	0	0	1	0	0	0	0	0	0	0	0	0	0	0	0	0	0	0	2	0	0	23	0	0	0	0	0	29
d__Bacteria	k__norank	p__Proteobacteria	c__Alphaproteobacteria	o__Rhodospirillales	f__unclassified_o__Rhodospirillales	g__unclassified_o__Rhodospirillales	s__unclassified_o__Rhodospirillales	OTU508	0	0	6	0	0	0	0	0	0	0	0	0	0	0	0	0	0	0	0	0	0	0	0	0	0	0	0	0	0	0	0	0	0	0	0	0	0	0	6
d__Bacteria	k__norank	p__Proteobacteria	c__Deltaproteobacteria	o__Desulfurellales	f__Desulfurellaceae	g__H16	s__unclassified_g__H16	OTU1753	0	0	0	0	0	0	0	0	0	0	0	0	0	0	0	0	0	0	3	5	3	4	2	0	0	0	1	3	0	0	0	0	0	0	0	0	0	0	21
d__Bacteria	k__norank	p__Bacteroidetes	c__Flavobacteriia	o__Flavobacteriales	f__Flavobacteriaceae	g__Flavobacterium	s__unclassified_g__Flavobacterium	OTU1158	5	6	5	20	2	8	0	2	0	0	0	0	0	0	0	0	0	0	0	0	0	0	0	0	0	0	0	0	0	0	0	0	2	0	0	0	0	0	50
d__Bacteria	k__norank	p__Proteobacteria	c__Alphaproteobacteria	o__Rhodospirillales	f__Rhodospirillaceae	g__Defluviicoccus	s__uncultured_Rhodospirillaceae_bacterium_g__Defluviicoccus	OTU2023	0	0	0	0	0	0	0	0	0	0	0	0	0	0	0	0	0	0	0	0	0	0	0	0	0	0	0	0	24	31	0	2	190	0	0	0	0	0	247
d__Bacteria	k__norank	p__Proteobacteria	c__Alphaproteobacteria	o__Sphingomonadales	f__Sphingomonadaceae	g__unclassified_f__Sphingomonadaceae	s__unclassified_f__Sphingomonadaceae	OTU1253	32	22	11	53	7	51	4	5	7	5	3	0	2	248	1	0	0	0	0	0	0	0	0	0	0	0	0	0	0	0	0	0	2	0	0	0	0	0	453
d__Bacteria	k__norank	p__Firmicutes	c__Clostridia	o__Clostridiales	f__Ruminococcaceae	g__Ruminiclostridium_6	s__unclassified_g__Ruminiclostridium_6	OTU348	0	0	11	0	0	0	0	0	0	0	0	0	0	0	0	0	0	0	0	0	0	0	0	0	0	0	0	0	0	0	0	0	0	0	0	0	0	0	11
d__Bacteria	k__norank	p__Chloroflexi	c__TK10	o__norank_c__TK10	f__norank_c__TK10	g__norank_c__TK10	s__uncultured_gamma_proteobacterium_g__norank_c__TK10	OTU1	3	0	0	0	0	0	0	0	0	0	0	0	0	0	0	0	0	0	0	0	0	0	0	0	0	0	0	0	0	0	0	0	0	0	0	0	0	0	3
d__Bacteria	k__norank	p__Chloroflexi	c__Anaerolineae	o__Anaerolineales	f__Anaerolineaceae	g__norank_f__Anaerolineaceae	s__unclassified_g__norank_f__Anaerolineaceae	OTU1615	0	0	0	0	0	0	0	0	0	0	0	0	0	0	0	0	0	0	0	3	4	0	1	3	0	0	0	1	0	0	0	0	0	0	0	0	0	0	12
d__Bacteria	k__norank	p__Chloroflexi	c__Anaerolineae	o__Anaerolineales	f__Anaerolineaceae	g__norank_f__Anaerolineaceae	s__unclassified_g__norank_f__Anaerolineaceae	OTU1616	0	0	0	0	0	0	0	0	0	0	0	0	0	0	0	0	0	0	6	2	14	2	0	1	1	1	0	0	0	0	0	0	0	0	0	0	0	0	27
d__Bacteria	k__norank	p__Bacteroidetes	c__Bacteroidia	o__Bacteroidales	f__Bacteroidales_S24-7_group	g__norank_f__Bacteroidales_S24-7_group	s__uncultured_bacterium_g__norank_f__Bacteroidales_S24-7_group	OTU413	0	0	13	0	0	0	0	0	0	0	0	0	0	0	0	0	0	0	0	0	0	0	0	0	0	0	0	0	0	0	0	0	0	0	0	0	0	0	13
d__Bacteria	k__norank	p__Proteobacteria	c__Gammaproteobacteria	o__Xanthomonadales	f__Xanthomonadaceae	g__norank_f__Xanthomonadaceae	s__uncultured_bacterium_g__norank_f__Xanthomonadaceae	OTU538	0	0	12	0	0	0	0	0	0	0	0	0	0	0	0	0	0	0	0	0	0	0	0	0	0	0	0	0	0	0	0	0	0	0	0	0	0	0	12
d__Bacteria	k__norank	p__Bacteroidetes	c__Bacteroidia	o__Bacteroidales	f__Porphyromonadaceae	g__Odoribacter	s__uncultured_bacterium_g__Odoribacter	OTU456	0	0	12	0	0	0	0	0	0	0	0	0	0	0	0	0	0	0	0	0	0	0	0	0	0	0	0	0	0	0	0	0	0	0	0	0	0	0	12
d__Bacteria	k__norank	p__Proteobacteria	c__Gammaproteobacteria	o__Xanthomonadales	f__Xanthomonadaceae	g__norank_f__Xanthomonadaceae	s__unclassified_g__norank_f__Xanthomonadaceae	OTU356	0	0	7	0	0	0	0	0	0	0	0	0	0	0	0	0	0	0	0	0	0	0	0	0	0	0	0	0	0	0	0	0	0	0	0	0	0	0	7
d__Bacteria	k__norank	p__Firmicutes	c__Bacilli	o__Lactobacillales	f__Streptococcaceae	g__Lactococcus	s__Lactococcus_raffinolactis	OTU1387	503	1434	713	831	223	826	7174	4679	92	3503	3231	0	62	555	36	0	0	0	0	0	0	0	3	0	0	0	0	0	0	1	0	1	4	0	0	0	0	0	23871
d__Bacteria	k__norank	p__Actinobacteria	c__Actinobacteria	o__Solirubrobacterales	f__Elev-16S-1332	g__norank_f__Elev-16S-1332	s__unclassified_g__norank_f__Elev-16S-1332	OTU236	0	19	0	0	0	0	0	0	0	0	0	0	0	0	0	0	0	0	0	0	0	0	0	0	0	0	0	0	0	0	0	0	0	0	0	0	0	0	19
d__Bacteria	k__norank	p__Bacteroidetes	c__Bacteroidia	o__Bacteroidales	f__Prevotellaceae	g__Prevotella_1	s__unclassified_g__Prevotella_1	OTU672	0	0	56	31	61	16	0	0	0	0	0	0	0	0	0	0	0	0	0	0	0	0	0	0	0	0	0	0	0	0	0	0	0	0	0	0	0	0	164
d__Bacteria	k__norank	p__Firmicutes	c__Clostridia	o__Clostridiales	f__unclassified_o__Clostridiales	g__unclassified_o__Clostridiales	s__unclassified_o__Clostridiales	OTU904	0	0	0	0	10	0	0	0	0	0	0	0	0	0	0	0	0	0	0	0	0	0	0	0	0	0	0	0	0	0	0	0	0	0	0	0	0	0	10
d__Bacteria	k__norank	p__Planctomycetes	c__Phycisphaerae	o__Phycisphaerales	f__Phycisphaeraceae	g__SM1A02	s__uncultured_bacterium_g__SM1A02	OTU36	21	0	0	0	0	0	0	0	0	0	0	0	0	0	0	0	0	0	0	0	0	0	0	0	0	0	0	1	0	0	0	0	0	0	0	0	0	0	22
d__Bacteria	k__norank	p__Gemmatimonadetes	c__Gemmatimonadetes	o__Gemmatimonadales	f__Gemmatimonadaceae	g__norank_f__Gemmatimonadaceae	s__uncultured_Gemmatimonadetes_bacterium_g__norank_f__Gemmatimonadaceae	OTU26	18	0	0	0	0	0	0	0	0	0	0	0	0	0	0	0	0	0	0	0	0	0	0	0	0	0	0	0	0	0	0	0	0	0	0	0	0	0	18
d__Bacteria	k__norank	p__Chloroflexi	c__Anaerolineae	o__Anaerolineales	f__Anaerolineaceae	g__norank_f__Anaerolineaceae	s__unclassified_g__norank_f__Anaerolineaceae	OTU142	34	0	0	0	0	0	0	0	0	0	0	0	0	0	0	0	0	0	0	0	0	0	0	0	0	0	0	0	0	0	0	0	0	0	0	0	0	0	34
d__Bacteria	k__norank	p__Actinobacteria	c__Actinobacteria	o__Micrococcales	f__Micrococcaceae	g__Micrococcus	s__unclassified_g__Micrococcus	OTU395	0	0	16	0	0	0	0	10	0	0	0	0	0	0	0	0	0	0	0	0	0	0	0	0	0	0	0	0	0	0	0	0	0	0	0	0	0	0	26
d__Bacteria	k__norank	p__Firmicutes	c__Clostridia	o__Clostridiales	f__Christensenellaceae	g__Christensenellaceae_R-7_group	s__unclassified_g__Christensenellaceae_R-7_group	OTU955	0	0	0	0	14	0	0	0	0	0	0	0	0	0	0	0	0	0	0	0	0	0	0	0	0	0	0	0	0	0	0	0	0	0	0	0	0	0	14
d__Bacteria	k__norank	p__Tenericutes	c__Mollicutes	o__Mollicutes_RF9	f__norank_o__Mollicutes_RF9	g__norank_o__Mollicutes_RF9	s__unclassified_g__norank_o__Mollicutes_RF9	OTU1042	0	0	0	8	18	1	0	0	0	0	0	0	0	0	0	0	0	0	0	0	0	0	0	0	0	0	0	0	0	0	0	0	0	0	0	0	0	0	27
d__Bacteria	k__norank	p__Proteobacteria	c__Gammaproteobacteria	o__Pseudomonadales	f__Moraxellaceae	g__Acinetobacter	s__Acinetobacter_bohemicus_ANC_3994	OTU250	72	42	59	5	2	16	0	0	0	0	0	0	0	0	0	0	0	0	0	0	0	0	0	0	0	0	0	0	0	0	0	0	0	0	0	0	0	0	196
d__Bacteria	k__norank	p__Cyanobacteria	c__Cyanobacteria	o__norank_c__Cyanobacteria	f__norank_c__Cyanobacteria	g__norank_c__Cyanobacteria	s__Coelastrella_sp._M60_g__norank	OTU1900	0	0	0	0	0	0	0	0	0	1	0	0	0	0	0	0	0	0	16	9	16	5	1	6	3	7	2	6	0	5	1	0	3	0	0	0	0	0	81
d__Bacteria	k__norank	p__Proteobacteria	c__Deltaproteobacteria	o__Oligoflexales	f__Oligoflexaceae	g__norank_f__Oligoflexaceae	s__uncultured_bacterium_g__norank_f__Oligoflexaceae	OTU1696	0	0	0	0	0	0	0	0	0	0	0	0	0	0	0	0	0	0	6	4	7	2	3	1	1	0	0	2	0	0	0	0	0	0	0	0	0	0	26
d__Bacteria	k__norank	p__Chloroflexi	c__Anaerolineae	o__Anaerolineales	f__Anaerolineaceae	g__norank_f__Anaerolineaceae	s__unclassified_g__norank_f__Anaerolineaceae	OTU2142	0	0	0	0	0	0	0	0	0	0	0	0	0	0	0	0	0	0	0	0	0	0	0	0	0	0	0	0	17	37	0	5	108	0	0	0	0	0	167
d__Bacteria	k__norank	p__Proteobacteria	c__Gammaproteobacteria	o__Methylococcales	f__Methylococcaceae	g__Methyloparacoccus	s__uncultured_Methylococcaceae_bacterium_g__Methyloparacoccus	OTU2145	0	1	9	4	0	0	14	41	0	0	1	0	0	1	0	0	0	0	0	3	3	2	1	0	0	1	0	0	1	4	0	3	22	0	0	0	0	0	111
d__Bacteria	k__norank	p__Proteobacteria	c__Gammaproteobacteria	o__Cardiobacteriales	f__Cardiobacteriaceae	g__Suttonella	s__unclassified_g__Suttonella	OTU468	0	0	20	0	0	1	0	0	0	0	0	0	0	0	0	0	0	0	0	0	0	0	0	0	0	0	0	0	0	0	0	0	0	0	0	0	0	0	21
d__Bacteria	k__norank	p__Chloroflexi	c__Chloroflexia	o__Chloroflexales	f__Roseiflexaceae	g__Roseiflexus	s__uncultured_bacterium_g__Roseiflexus	OTU952	0	0	0	0	10	0	0	0	0	0	0	0	0	0	0	0	0	0	0	0	0	0	0	0	0	0	0	0	0	0	0	0	0	0	0	0	0	0	10
d__Bacteria	k__norank	p__Nitrospirae	c__Nitrospira	o__norank_c__Nitrospira	f__norank_c__Nitrospira	g__Nitrospira	s__unclassified_g__Nitrospira	OTU336	0	0	9	0	0	0	0	0	0	0	0	0	0	0	0	0	0	0	0	0	0	0	0	0	0	0	0	0	0	0	0	0	0	0	0	0	0	0	9
d__Bacteria	k__norank	p__Proteobacteria	c__Deltaproteobacteria	o__Oligoflexales	f__Oligoflexaceae	g__norank_f__Oligoflexaceae	s__unclassified_g__norank_f__Oligoflexaceae	OTU1885	0	0	0	0	0	0	0	0	0	0	0	0	0	0	0	0	0	0	12	11	10	10	7	5	3	0	4	2	0	0	0	0	0	0	0	0	0	0	64
d__Bacteria	k__norank	p__Proteobacteria	c__Gammaproteobacteria	o__Legionellales	f__Coxiellaceae	g__Aquicella	s__agricultural_soil_bacterium_SC-I-16	OTU1904	0	0	0	0	0	0	0	0	0	0	0	0	0	0	0	0	0	0	1	3	6	2	0	0	2	0	1	1	0	0	0	0	0	0	0	0	0	0	16
d__Bacteria	k__norank	p__Firmicutes	c__Clostridia	o__Clostridiales	f__Lachnospiraceae	g__Lachnospiraceae_NK4A136_group	s__unclassified_g__Lachnospiraceae_NK4A136_group	OTU601	0	1	43	1	0	0	0	0	0	0	0	0	2	2	0	1	0	0	0	0	0	0	0	0	1	3	0	0	0	0	0	0	0	0	0	0	0	0	54
d__Bacteria	k__norank	p__Firmicutes	c__Clostridia	o__Clostridiales	f__unclassified_o__Clostridiales	g__unclassified_o__Clostridiales	s__unclassified_o__Clostridiales	OTU1107	0	0	0	0	0	7	0	0	0	0	0	0	0	0	0	0	0	0	0	0	0	0	0	0	0	0	0	0	0	0	0	0	0	0	0	0	0	0	7
d__Bacteria	k__norank	p__Firmicutes	c__Clostridia	o__Clostridiales	f__Clostridiaceae_1	g__Clostridium_sensu_stricto_13	s__unclassified_g__Clostridium_sensu_stricto_13	OTU1896	0	0	0	0	0	0	0	1	0	0	0	0	0	0	0	0	0	0	1	1	1	0	4	0	1	1	0	1	1	4	0	0	8	0	0	0	1	0	25
d__Bacteria	k__norank	p__Proteobacteria	c__Gammaproteobacteria	o__Xanthomonadales	f__Xanthomonadaceae	g__Rhodanobacter	s__Rhodanobacter_lindaniclasticus_g__Rhodanobacter	OTU1054	0	0	0	6	36	0	0	0	0	0	0	0	0	0	0	0	0	0	0	0	0	0	0	0	0	0	0	0	0	0	0	0	0	0	0	0	0	0	42
d__Bacteria	k__norank	p__Saccharibacteria	c__norank_p__Saccharibacteria	o__norank_p__Saccharibacteria	f__norank_p__Saccharibacteria	g__norank_p__Saccharibacteria	s__uncultured_bacterium_g__norank_p__Saccharibacteria	OTU1416	0	0	0	0	1	1	0	5	2	4	0	0	0	8	0	0	0	0	0	0	0	0	0	0	0	0	0	0	0	0	0	0	3	0	0	0	0	0	24
d__Bacteria	k__norank	p__Fusobacteria	c__Fusobacteriia	o__Fusobacteriales	f__Fusobacteriaceae	g__Cetobacterium	s__unclassified_g__Cetobacterium	OTU1421	0	0	0	0	0	0	0	0	0	0	0	0	0	0	0	0	2	0	0	0	0	0	0	0	0	0	0	0	0	0	0	0	0	0	0	0	0	0	2
d__Bacteria	k__norank	p__Deinococcus-Thermus	c__Deinococci	o__Deinococcales	f__Deinococcaceae	g__Deinococcus	s__uncultured_organism_g__Deinococcus	OTU562	0	0	19	0	0	0	0	0	0	0	0	0	0	0	0	0	0	0	0	0	0	0	0	0	0	0	0	0	0	0	0	0	0	0	0	0	0	0	19
d__Bacteria	k__norank	p__Acidobacteria	c__Acidobacteria	o__norank_c__Acidobacteria	f__norank_c__Acidobacteria	g__norank_c__Acidobacteria	s__uncultured_Acidobacteriales_bacterium_g__norank_c__Acidobacteria	OTU300	0	2	13	2	4	5	0	0	0	0	0	0	0	0	0	0	0	0	0	0	0	0	0	0	0	0	0	0	0	0	0	0	0	0	0	0	0	0	26
d__Bacteria	k__norank	p__Proteobacteria	c__Gammaproteobacteria	o__Xanthomonadales	f__Xanthomonadaceae	g__Stenotrophomonas	s__Stenotrophomonas_maltophilia_R551-3	OTU422	2	11	8	0	3	2	26	4	0	11	41	0	5	7	0	0	0	0	0	0	0	0	1	0	0	0	0	0	1	1	1	0	1	0	0	0	0	0	125
d__Bacteria	k__norank	p__Firmicutes	c__Erysipelotrichia	o__Erysipelotrichales	f__Erysipelotrichaceae	g__Erysipelotrichaceae_UCG-004	s__uncultured_rumen_bacterium_g__Erysipelotrichaceae_UCG-004	OTU822	0	0	17	0	18	0	0	0	0	0	0	0	0	0	0	0	0	0	0	0	0	0	0	0	0	0	0	0	0	0	0	0	0	0	0	0	0	0	35
d__Bacteria	k__norank	p__Proteobacteria	c__Alphaproteobacteria	o__Rickettsiales	f__Rickettsiaceae	g__unclassified_f__Rickettsiaceae	s__unclassified_f__Rickettsiaceae	OTU1352	0	0	0	0	0	0	0	3	0	0	0	0	0	0	0	0	0	0	0	0	0	0	0	0	0	0	0	0	0	1	0	5	15	0	0	0	0	0	24
d__Bacteria	k__norank	p__Firmicutes	c__Clostridia	o__Clostridiales	f__Christensenellaceae	g__Christensenellaceae_R-7_group	s__unclassified_g__Christensenellaceae_R-7_group	OTU179	0	11	0	3	72	0	0	0	0	0	0	0	0	0	0	0	0	0	0	0	0	0	0	0	0	0	0	0	0	0	0	0	0	0	0	0	0	0	86
d__Bacteria	k__norank	p__Proteobacteria	c__Gammaproteobacteria	o__Arenicellales	f__Arenicellaceae	g__norank_f__Arenicellaceae	s__uncultured_prokaryote_g__norank_f__Arenicellaceae	OTU2041	0	0	0	0	0	0	0	1	0	0	0	0	0	1	0	0	0	0	0	1	19	3	2	0	1	0	3	2	0	1	0	0	0	0	0	0	0	0	34
d__Bacteria	k__norank	p__unclassified_k__norank	c__unclassified_k__norank	o__unclassified_k__norank	f__unclassified_k__norank	g__unclassified_k__norank	s__unclassified_k__norank	OTU1168	0	0	0	0	0	14	0	0	0	0	0	0	0	0	0	0	0	0	0	0	0	0	0	0	0	0	0	0	0	0	0	0	0	0	0	0	0	0	14
d__Bacteria	k__norank	p__Chloroflexi	c__TK10	o__norank_c__TK10	f__norank_c__TK10	g__norank_c__TK10	s__Chloroflexi_bacterium_OLB14	OTU1278	0	0	0	0	0	0	12	0	0	0	0	0	0	0	0	0	0	0	0	0	0	0	0	0	0	0	0	0	0	0	0	0	0	0	0	0	0	0	12
d__Bacteria	k__norank	p__Actinobacteria	c__Actinobacteria	o__PeM15	f__norank_o__PeM15	g__norank_o__PeM15	s__uncultured_bacterium_g__norank_o__PeM15	OTU1334	0	0	0	0	0	0	13	22	0	0	0	0	0	1	0	0	0	0	6	5	12	4	7	2	5	1	5	0	0	1	0	0	14	0	0	0	0	0	98
d__Bacteria	k__norank	p__Bacteroidetes	c__Bacteroidia	o__Bacteroidales	f__Prevotellaceae	g__Prevotella_1	s__unclassified_g__Prevotella_1	OTU252	0	11	19	10	97	9	0	0	0	0	0	0	0	0	0	0	0	0	0	0	0	0	0	0	0	0	0	0	0	0	0	0	0	0	0	0	0	0	146
d__Bacteria	k__norank	p__Proteobacteria	c__Gammaproteobacteria	o__Legionellales	f__Legionellaceae	g__Legionella	s__uncultured_bacterium_g__Legionella	OTU1719	0	0	0	0	0	0	0	0	0	0	0	0	0	0	0	0	0	0	29	43	90	20	23	8	6	10	9	8	0	0	0	0	0	0	0	0	0	0	246
d__Bacteria	k__norank	p__Elusimicrobia	c__Elusimicrobia	o__Elusimicrobiales	f__Elusimicrobiaceae	g__Elusimicrobium	s__uncultured_bacterium_g__Elusimicrobium	OTU369	0	0	18	0	0	5	0	0	0	0	0	0	0	0	0	0	0	0	0	0	0	0	0	0	0	0	0	0	0	0	0	0	0	0	0	0	0	0	23
d__Bacteria	k__norank	p__Chloroflexi	c__Anaerolineae	o__Anaerolineales	f__Anaerolineaceae	g__norank_f__Anaerolineaceae	s__uncultured_Gemmatimonadetes_bacterium_g__norank_f__Anaerolineaceae	OTU1699	0	0	0	0	0	0	0	0	0	0	0	0	0	0	0	0	0	0	0	0	7	0	0	0	0	0	0	0	0	0	0	0	0	0	0	0	0	0	7
d__Bacteria	k__norank	p__Proteobacteria	c__Deltaproteobacteria	o__Myxococcales	f__Polyangiaceae	g__Sorangium	s__unclassified_g__Sorangium	OTU134	7	0	0	0	0	0	0	0	0	0	0	0	0	0	0	0	0	0	0	0	0	0	0	0	0	0	0	0	0	0	0	0	0	0	0	0	0	0	7
d__Bacteria	k__norank	p__Firmicutes	c__Clostridia	o__Clostridiales	f__Christensenellaceae	g__Christensenellaceae_R-7_group	s__bacterium_AC2043	OTU946	0	0	0	0	18	3	0	0	0	0	0	0	0	0	0	0	0	0	0	0	0	0	0	0	0	0	0	0	0	0	0	0	0	0	0	0	0	0	21
d__Bacteria	k__norank	p__Firmicutes	c__Clostridia	o__Clostridiales	f__Lachnospiraceae	g__Lachnospiraceae_NK3A20_group	s__unclassified_g__Lachnospiraceae_NK3A20_group	OTU806	0	18	0	2	68	5	0	0	0	0	0	0	0	0	0	0	0	0	0	0	0	0	0	0	0	0	0	0	0	0	0	0	0	0	0	0	0	0	93
d__Bacteria	k__norank	p__Elusimicrobia	c__Elusimicrobia	o__Elusimicrobiales	f__Elusimicrobiaceae	g__Elusimicrobium	s__uncultured_bacterium_g__Elusimicrobium	OTU161	0	17	0	0	0	10	0	0	0	0	0	0	0	0	0	0	0	0	0	0	0	0	0	0	0	0	0	0	0	0	0	0	0	0	0	0	0	0	27
d__Bacteria	k__norank	p__Deinococcus-Thermus	c__Deinococci	o__Deinococcales	f__Deinococcaceae	g__Deinococcus	s__bacterium_1227R	OTU256	0	16	0	0	0	0	0	0	0	0	0	0	0	0	0	0	0	0	0	0	0	0	0	0	0	0	0	0	0	0	0	0	0	0	0	0	0	0	16
d__Bacteria	k__norank	p__Bacteroidetes	c__Cytophagia	o__Cytophagales	f__Cytophagaceae	g__norank_f__Cytophagaceae	s__unclassified_g__norank_f__Cytophagaceae	OTU39	25	0	0	0	0	0	0	0	0	0	0	0	0	0	0	0	0	0	0	0	0	0	0	0	0	0	0	0	0	0	0	0	0	0	0	0	0	0	25
d__Bacteria	k__norank	p__Verrucomicrobia	c__WCHB1-41	o__norank_c__WCHB1-41	f__norank_c__WCHB1-41	g__norank_c__WCHB1-41	s__uncultured_rumen_bacterium_g__norank_c__WCHB1-41	OTU1110	0	9	0	0	26	2	0	0	0	0	0	0	0	0	0	0	0	0	0	0	0	0	0	0	0	0	0	0	0	0	0	0	0	0	0	0	0	0	37
d__Bacteria	k__norank	p__Firmicutes	c__Clostridia	o__D8A-2	f__norank_o__D8A-2	g__norank_o__D8A-2	s__anaerobic_digester_metagenome_g__norank_o__D8A-2	OTU1793	0	0	0	0	0	0	0	0	0	0	0	0	0	0	0	0	0	0	0	0	0	0	10	0	0	0	0	0	0	0	0	0	0	0	0	0	0	0	10
d__Bacteria	k__norank	p__Firmicutes	c__Clostridia	o__Clostridiales	f__Lachnospiraceae	g__unclassified_f__Lachnospiraceae	s__unclassified_f__Lachnospiraceae	OTU409	0	0	12	0	0	0	0	0	0	0	0	0	0	0	0	0	0	0	0	0	0	0	0	0	0	0	0	0	0	0	0	0	0	0	0	0	0	0	12
d__Bacteria	k__norank	p__Cyanobacteria	c__Cyanobacteria	o__norank_c__Cyanobacteria	f__norank_c__Cyanobacteria	g__norank_c__Cyanobacteria	s__unclassified_g__norank_c__Cyanobacteria	OTU1846	0	0	0	0	0	0	0	0	0	0	0	0	0	0	0	0	0	0	10	2	2	3	8	3	2	3	0	0	0	0	0	0	0	0	0	0	0	0	33
d__Bacteria	k__norank	p__Firmicutes	c__Clostridia	o__Clostridiales	f__Ruminococcaceae	g__Ruminococcus_1	s__bacterium_MD3002	OTU1211	0	2	0	0	1	9	0	0	0	0	0	0	0	0	0	0	0	0	0	0	0	0	0	0	0	0	0	0	0	0	0	0	0	0	0	0	0	0	12
d__Bacteria	k__norank	p__Cyanobacteria	c__Cyanobacteria	o__norank_c__Cyanobacteria	f__norank_c__Cyanobacteria	g__norank_c__Cyanobacteria	s__unclassified_g__norank_c__Cyanobacteria	OTU1844	0	0	0	0	0	0	0	0	0	0	0	0	0	0	0	0	0	0	12	5	0	2	2	4	1	2	2	2	0	0	0	0	0	0	0	0	0	0	32
d__Bacteria	k__norank	p__Cyanobacteria	c__Cyanobacteria	o__norank_c__Cyanobacteria	f__norank_c__Cyanobacteria	g__norank_c__Cyanobacteria	s__unclassified_g__norank_c__Cyanobacteria	OTU1849	0	0	0	0	0	0	0	0	1	0	0	0	0	0	0	0	0	0	29	23	47	13	10	21	8	9	2	14	1	1	0	0	3	0	0	0	0	0	182
d__Bacteria	k__norank	p__Cyanobacteria	c__Cyanobacteria	o__norank_c__Cyanobacteria	f__norank_c__Cyanobacteria	g__norank_c__Cyanobacteria	s__Oocystis_solitaria	OTU1455	0	0	0	0	0	0	0	1	0	0	0	0	0	0	0	0	0	0	199	147	208	93	94	90	40	56	10	47	1	0	0	1	1	0	0	0	0	0	988
d__Bacteria	k__norank	p__Firmicutes	c__Clostridia	o__Clostridiales	f__Lachnospiraceae	g__unclassified_f__Lachnospiraceae	s__unclassified_f__Lachnospiraceae	OTU404	0	0	15	0	0	0	0	0	0	0	0	0	0	0	0	0	0	0	0	0	0	0	0	0	0	0	0	0	0	0	0	0	0	0	0	0	0	0	15
d__Bacteria	k__norank	p__Firmicutes	c__Clostridia	o__Clostridiales	f__Ruminococcaceae	g__Ruminococcaceae_UCG-010	s__unclassified_g__Ruminococcaceae_UCG-010	OTU564	0	8	49	30	82	26	0	0	0	0	0	0	0	0	0	0	0	0	0	0	0	0	0	0	0	0	0	0	0	0	0	0	0	0	0	0	0	0	195
d__Bacteria	k__norank	p__Bacteroidetes	c__Bacteroidia	o__Bacteroidales	f__unclassified_o__Bacteroidales	g__unclassified_o__Bacteroidales	s__unclassified_o__Bacteroidales	OTU526	0	0	47	0	120	14	0	0	0	0	0	0	0	0	0	0	0	0	0	0	0	0	0	0	0	0	0	0	0	0	0	0	0	0	0	0	0	0	181
d__Bacteria	k__norank	p__Bacteroidetes	c__Bacteroidia	o__Bacteroidales	f__Prevotellaceae	g__Prevotella_1	s__unclassified_g__Prevotella_1	OTU1227	0	0	0	0	0	20	0	0	0	0	0	0	0	0	0	0	0	0	0	0	0	0	0	0	0	0	0	0	0	0	0	0	0	0	0	0	0	0	20
d__Bacteria	k__norank	p__Fibrobacteres	c__Fibrobacteria	o__Fibrobacterales	f__Fibrobacteraceae	g__Fibrobacter	s__Fibrobacter_succinogenes_subsp._succinogenes	OTU761	0	0	6	0	29	4	0	0	0	0	0	0	0	0	0	0	0	0	0	0	0	0	0	0	0	0	0	0	0	0	0	0	0	0	0	0	0	0	39
d__Bacteria	k__norank	p__Saccharibacteria	c__norank_p__Saccharibacteria	o__norank_p__Saccharibacteria	f__norank_p__Saccharibacteria	g__norank_p__Saccharibacteria	s__unclassified_g__norank_p__Saccharibacteria	OTU425	0	0	9	13	0	0	0	0	0	0	1	0	0	0	0	0	0	0	0	0	0	0	0	0	0	0	0	0	0	0	0	0	0	0	0	0	0	0	23
d__Bacteria	k__norank	p__Gemmatimonadetes	c__Gemmatimonadetes	o__Gemmatimonadales	f__Gemmatimonadaceae	g__norank_f__Gemmatimonadaceae	s__uncultured_prokaryote_g__norank_f__Gemmatimonadaceae	OTU596	0	0	14	0	0	0	0	0	0	0	0	0	0	0	0	0	0	0	0	0	0	0	0	0	0	0	0	0	0	0	0	0	0	0	0	0	0	0	14
d__Bacteria	k__norank	p__Proteobacteria	c__Alphaproteobacteria	o__Caulobacterales	f__Caulobacteraceae	g__Brevundimonas	s__Brevundimonas_nasdae	OTU719	7	0	30	4	3	0	0	2	0	5	1	1	5	38	1	0	0	0	0	0	3	0	0	0	0	0	0	0	0	5	0	0	3	0	0	0	0	0	108
d__Bacteria	k__norank	p__Chloroflexi	c__SJA-15	o__norank_c__SJA-15	f__norank_c__SJA-15	g__norank_c__SJA-15	s__unclassified_g__norank_c__SJA-15	OTU2096	0	0	0	0	0	0	0	0	0	0	1	0	0	0	0	0	0	0	8	5	8	3	0	0	0	1	0	2	3	3	0	1	15	0	0	0	0	0	50
d__Bacteria	k__norank	p__Proteobacteria	c__Gammaproteobacteria	o__unclassified_c__Gammaproteobacteria	f__unclassified_c__Gammaproteobacteria	g__unclassified_c__Gammaproteobacteria	s__unclassified_c__Gammaproteobacteria	OTU451	0	0	10	0	0	0	0	0	0	0	0	0	0	0	0	0	0	0	0	0	0	0	0	0	0	0	0	0	0	0	0	0	0	0	0	0	0	0	10
d__Bacteria	k__norank	p__Proteobacteria	c__Alphaproteobacteria	o__Rickettsiales	f__Mitochondria	g__norank_f__Mitochondria	s__unclassified_g__norank_f__Mitochondria	OTU1102	0	0	0	0	0	44	0	0	0	0	0	0	0	0	0	0	0	0	0	0	0	0	0	0	0	0	0	0	0	0	0	0	0	0	0	0	0	0	44
d__Bacteria	k__norank	p__Proteobacteria	c__Deltaproteobacteria	o__Syntrophobacterales	f__Syntrophobacteraceae	g__Syntrophobacter	s__uncultured_delta_proteobacterium_g__Syntrophobacter	OTU1977	0	0	0	0	0	0	0	0	0	0	0	0	0	0	0	0	0	0	22	21	36	25	34	12	2	17	10	8	0	0	0	0	0	0	0	0	0	0	187
d__Bacteria	k__norank	p__Firmicutes	c__Clostridia	o__Clostridiales	f__Lachnospiraceae	g__Acetitomaculum	s__uncultured_rumen_bacterium_g__Acetitomaculum	OTU935	0	0	0	0	55	19	0	0	0	0	0	0	0	0	0	0	0	0	0	0	0	0	0	0	0	0	0	0	0	0	0	0	0	0	0	0	0	0	74
d__Bacteria	k__norank	p__Proteobacteria	c__Betaproteobacteria	o__SC-I-84	f__norank_o__SC-I-84	g__norank_o__SC-I-84	s__uncultured_bacterium_g__norank_o__SC-I-84	OTU1474	0	0	0	0	0	0	0	0	0	0	0	0	0	0	0	0	0	0	9	9	4	2	8	2	1	0	1	2	0	0	0	0	0	0	0	0	0	0	38
d__Bacteria	k__norank	p__Proteobacteria	c__Betaproteobacteria	o__SC-I-84	f__norank_o__SC-I-84	g__norank_o__SC-I-84	s__uncultured_bacterium_g__norank_o__SC-I-84	OTU1507	0	0	0	0	0	0	0	0	0	0	0	0	0	0	0	0	0	0	5	8	9	4	3	1	0	4	2	3	0	0	0	0	0	0	0	0	0	0	39
d__Bacteria	k__norank	p__Firmicutes	c__Clostridia	o__Clostridiales	f__Ruminococcaceae	g__Ruminococcaceae_UCG-014	s__uncultured_bacterium_g__Ruminococcaceae_UCG-014	OTU461	0	0	28	0	8	0	0	0	0	0	0	0	0	0	0	0	0	0	0	0	0	0	0	0	0	0	0	0	0	0	0	0	0	0	0	0	0	0	36
d__Bacteria	k__norank	p__Proteobacteria	c__Deltaproteobacteria	o__Desulfurellales	f__Desulfurellaceae	g__H16	s__unclassified_g__H16	OTU1746	0	0	1	0	0	0	0	0	0	0	0	0	0	0	0	0	0	0	3	4	3	4	6	0	0	0	1	0	0	0	0	0	0	0	0	0	0	0	22
d__Bacteria	k__norank	p__Firmicutes	c__Clostridia	o__Clostridiales	f__Lachnospiraceae	g__Roseburia	s__unclassified_g__Roseburia	OTU678	0	0	0	13	0	17	0	0	0	0	0	0	0	0	0	0	0	0	0	0	0	0	0	0	0	0	0	0	0	0	0	0	0	0	0	0	0	0	30
d__Bacteria	k__norank	p__Cyanobacteria	c__Cyanobacteria	o__norank_c__Cyanobacteria	f__norank_c__Cyanobacteria	g__norank_c__Cyanobacteria	s__Virgulinella_fragilis	OTU1899	0	0	0	0	0	0	0	0	0	0	0	0	0	0	0	0	0	0	12	6	5	5	1	3	2	7	1	5	5	8	0	3	35	0	0	0	0	0	98
d__Bacteria	k__norank	p__Gemmatimonadetes	c__Gemmatimonadetes	o__Gemmatimonadales	f__Gemmatimonadaceae	g__norank_f__Gemmatimonadaceae	s__unclassified_g__norank_f__Gemmatimonadaceae	OTU330	0	0	8	0	0	0	0	0	0	0	0	0	0	0	0	0	0	0	0	0	0	0	0	0	0	0	0	0	0	0	0	0	0	0	0	0	0	0	8
d__Bacteria	k__norank	p__Proteobacteria	c__Deltaproteobacteria	o__Myxococcales	f__Archangiaceae	g__Anaeromyxobacter	s__uncultured_soil_bacterium_g__Anaeromyxobacter	OTU1895	0	0	0	0	0	0	0	0	0	0	0	0	0	0	0	0	0	0	1	2	0	4	7	1	3	3	0	4	0	0	0	0	0	0	0	0	0	0	25
d__Bacteria	k__norank	p__Bacteroidetes	c__Bacteroidia	o__Bacteroidales	f__Prevotellaceae	g__Prevotellaceae_UCG-003	s__uncultured_rumen_bacterium_g__Prevotellaceae_UCG-003	OTU1187	0	38	85	113	133	61	0	1	0	0	0	0	0	0	0	0	0	0	0	0	0	0	0	0	0	0	0	0	0	0	0	0	0	0	0	0	0	0	431
d__Bacteria	k__norank	p__Planctomycetes	c__Planctomycetacia	o__Planctomycetales	f__Planctomycetaceae	g__norank_f__Planctomycetaceae	s__uncultured_prokaryote_g__norank_f__Planctomycetaceae	OTU1462	0	0	0	0	0	0	0	0	0	0	0	0	0	0	0	0	0	0	22	17	26	15	3	8	2	5	0	2	0	0	0	1	0	0	0	0	0	0	101
d__Bacteria	k__norank	p__Proteobacteria	c__Betaproteobacteria	o__Nitrosomonadales	f__Nitrosomonadaceae	g__norank_f__Nitrosomonadaceae	s__unclassified_g__norank_f__Nitrosomonadaceae	OTU192	0	4	0	0	0	0	0	0	0	0	0	0	0	0	0	0	0	0	0	0	0	0	0	0	0	0	0	0	0	0	0	0	0	0	0	0	0	0	4
d__Bacteria	k__norank	p__Acidobacteria	c__Acidobacteria	o__Solibacterales	f__Solibacteraceae__Subgroup_3_	g__Paludibaculum	s__unclassified_g__Paludibaculum	OTU48	18	0	0	0	0	0	0	0	0	0	0	0	0	0	0	0	0	0	1	0	0	1	0	0	0	0	0	0	0	0	0	0	0	0	0	0	0	0	20
d__Bacteria	k__norank	p__Proteobacteria	c__Alphaproteobacteria	o__Rhodospirillales	f__Rhodospirillaceae	g__norank_f__Rhodospirillaceae	s__Alphaproteobacteria_bacterium_canine_oral_taxon_081	OTU726	0	0	0	16	0	0	0	0	0	0	0	0	0	0	0	0	0	0	0	0	0	0	0	0	0	0	0	0	0	0	0	0	0	0	0	0	0	0	16
d__Bacteria	k__norank	p__Actinobacteria	c__Actinobacteria	o__Micrococcales	f__Microbacteriaceae	g__Leucobacter	s__unclassified_g__Leucobacter	OTU1203	0	0	1	1	5	6	4	8	0	9	0	0	0	2	0	0	0	0	1	5	33	1	2	0	0	0	0	1	2	1	1	0	16	0	0	0	0	0	99
d__Bacteria	k__norank	p__Proteobacteria	c__Alphaproteobacteria	o__Rhizobiales	f__Rhizobiales_Incertae_Sedis	g__Rhizomicrobium	s__unclassified_g__Rhizomicrobium	OTU591	0	0	15	0	0	0	0	0	0	0	0	0	0	0	0	0	0	0	0	0	0	0	0	0	0	0	0	0	0	0	0	0	0	0	0	0	0	0	15
d__Bacteria	k__norank	p__Proteobacteria	c__Gammaproteobacteria	o__Enterobacteriales	f__Enterobacteriaceae	g__Serratia	s__unclassified_g__Serratia	OTU2047	0	0	0	0	0	0	16	69	0	4	4	0	0	0	0	0	0	0	0	0	0	0	0	0	0	0	0	0	31	22	6	0	1	0	2	1	0	17	173
d__Bacteria	k__norank	p__Bacteroidetes	c__Bacteroidia	o__Bacteroidales	f__Prevotellaceae	g__Alloprevotella	s__uncultured_Bacteroidales_bacterium_g__Alloprevotella	OTU17	2	0	0	0	0	0	0	0	0	0	0	0	0	0	0	5	0	2	0	0	0	0	0	0	0	0	0	0	0	0	0	0	0	0	0	0	0	0	9
d__Bacteria	k__norank	p__Firmicutes	c__Clostridia	o__Clostridiales	f__Family_XIII	g__Family_XIII_UCG-002	s__uncultured_rumen_bacterium_g__Family_XIII_UCG-002	OTU1170	0	0	0	0	0	3	0	0	0	0	0	0	0	0	0	0	0	0	0	0	0	0	0	0	0	0	0	0	0	0	0	0	0	0	0	0	0	0	3
d__Bacteria	k__norank	p__Bacteroidetes	c__Bacteroidia	o__Bacteroidales	f__Bacteroidales_S24-7_group	g__norank_f__Bacteroidales_S24-7_group	s__uncultured_organism_g__norank_f__Bacteroidales_S24-7_group	OTU618	0	0	29	11	0	0	0	0	0	0	0	0	0	0	0	0	0	0	0	0	0	0	0	0	0	0	0	0	0	0	0	0	1	0	0	0	0	0	41
d__Bacteria	k__norank	p__Proteobacteria	c__Gammaproteobacteria	o__Thiotrichales	f__Thiotrichaceae	g__Thiothrix	s__metagenome_g__Thiothrix	OTU1829	0	0	0	0	0	0	0	0	0	0	0	0	0	0	0	0	0	0	0	0	0	0	58	0	0	0	0	0	0	0	0	0	0	0	0	0	0	0	58
d__Bacteria	k__norank	p__Bacteroidetes	c__Bacteroidia	o__Bacteroidales	f__Prevotellaceae	g__Prevotella_1	s__uncultured_bacterium_g__Prevotella_1	OTU525	0	0	19	0	0	0	0	0	0	0	0	0	0	0	0	0	0	0	0	0	0	0	0	0	0	0	0	0	0	0	0	0	0	0	0	0	0	0	19
d__Bacteria	k__norank	p__Chloroflexi	c__Caldilineae	o__Caldilineales	f__Caldilineaceae	g__norank_f__Caldilineaceae	s__unclassified_g__norank_f__Caldilineaceae	OTU1852	0	0	0	0	0	0	0	0	0	0	0	0	0	0	0	0	0	0	77	95	213	52	41	39	5	11	6	42	7	5	1	1	11	0	0	0	0	0	606
d__Bacteria	k__norank	p__Firmicutes	c__Clostridia	o__Clostridiales	f__Heliobacteriaceae	g__Hydrogenispora	s__uncultured_bacterium_g__Hydrogenispora	OTU1917	0	0	0	0	0	0	0	0	0	0	0	0	0	0	0	0	0	0	5	2	3	0	0	0	1	3	0	0	0	0	0	0	0	0	0	0	0	0	14
d__Bacteria	k__norank	p__Proteobacteria	c__Alphaproteobacteria	o__Rhizobiales	f__Methylobacteriaceae	g__Microvirga	s__uncultured_Rhizobiales_bacterium_g__Microvirga	OTU728	0	4	0	15	1	0	2	18	0	0	1	0	0	0	0	0	0	0	1	0	2	0	0	0	0	1	0	0	3	7	0	3	54	0	0	0	0	0	112
d__Bacteria	k__norank	p__Bacteroidetes	c__Bacteroidia	o__Bacteroidales	f__Bacteroidales_BS11_gut_group	g__norank_f__Bacteroidales_BS11_gut_group	s__uncultured_bacterium_g__norank_f__Bacteroidales_BS11_gut_group	OTU877	0	0	0	0	44	4	0	0	0	0	0	0	0	0	0	0	0	0	0	0	0	0	0	0	0	0	0	0	0	0	0	0	0	0	0	0	0	0	48
d__Bacteria	k__norank	p__Proteobacteria	c__Deltaproteobacteria	o__Desulfobacterales	f__Desulfobacteraceae	g__Sva0081_sediment_group	s__uncultured_soil_bacterium_g__Sva0081_sediment_group	OTU1975	0	0	0	0	0	0	0	0	0	0	0	0	0	0	0	0	0	0	28	25	10	40	19	15	8	4	15	22	0	0	0	0	0	0	0	0	0	0	186
d__Bacteria	k__norank	p__Firmicutes	c__Clostridia	o__Clostridiales	f__Lachnospiraceae	g__unclassified_f__Lachnospiraceae	s__unclassified_f__Lachnospiraceae	OTU1171	0	0	0	0	0	8	0	0	0	0	0	0	0	0	0	0	0	0	0	0	0	0	0	0	0	0	0	0	0	0	0	0	0	0	0	0	0	0	8
d__Bacteria	k__norank	p__unclassified_k__norank	c__unclassified_k__norank	o__unclassified_k__norank	f__unclassified_k__norank	g__unclassified_k__norank	s__unclassified_k__norank	OTU419	0	0	17	0	0	0	0	0	0	0	0	0	0	0	0	0	0	0	0	0	0	0	0	0	0	0	0	0	0	0	0	0	0	0	0	0	0	0	17
d__Bacteria	k__norank	p__Bacteroidetes	c__Flavobacteriia	o__Flavobacteriales	f__Flavobacteriaceae	g__Chryseobacterium	s__unclassified_g__Chryseobacterium	OTU707	306	283	295	104	41	210	1050	1398	1	871	5962	0	0	0	0	0	0	0	0	0	0	0	0	0	0	0	0	0	0	0	0	0	0	0	0	0	0	0	10521
d__Bacteria	k__norank	p__Bacteroidetes	c__Bacteroidia	o__Bacteroidales	f__Bacteroidales_BS11_gut_group	g__norank_f__Bacteroidales_BS11_gut_group	s__unclassified_g__norank_f__Bacteroidales_BS11_gut_group	OTU851	0	15	128	111	352	109	0	0	0	0	0	0	0	0	0	0	0	0	0	0	0	0	0	0	0	0	0	0	0	0	0	0	0	0	0	0	0	0	715
d__Bacteria	k__norank	p__Bacteroidetes	c__Bacteroidia	o__Bacteroidales	f__Bacteroidales_BS11_gut_group	g__norank_f__Bacteroidales_BS11_gut_group	s__unclassified_g__norank_f__Bacteroidales_BS11_gut_group	OTU859	0	15	23	17	47	32	0	0	0	0	0	0	0	0	0	0	0	0	0	0	0	0	0	0	0	0	0	0	0	0	0	0	0	0	0	0	0	0	134
d__Bacteria	k__norank	p__Bacteroidetes	c__Bacteroidia	o__Bacteroidales	f__Prevotellaceae	g__unclassified_f__Prevotellaceae	s__unclassified_f__Prevotellaceae	OTU174	0	16	0	0	0	0	0	0	0	0	0	0	0	0	0	0	0	0	0	0	0	0	0	0	0	0	0	0	0	0	0	0	0	0	0	0	0	0	16
d__Bacteria	k__norank	p__Actinobacteria	c__Actinobacteria	o__norank_c__Actinobacteria	f__norank_c__Actinobacteria	g__norank_c__Actinobacteria	s__uncultured_bacterium_0425-2M17	OTU602	0	0	35	0	0	0	0	0	0	0	0	0	0	0	0	0	0	0	0	0	0	0	0	0	0	0	0	0	0	0	0	0	0	0	0	0	0	0	35
d__Bacteria	k__norank	p__Chloroflexi	c__Chloroflexia	o__Chloroflexales	f__unclassified_o__Chloroflexales	g__unclassified_o__Chloroflexales	s__unclassified_o__Chloroflexales	OTU73	10	0	0	0	0	0	0	0	0	0	0	0	0	0	0	0	0	0	0	0	0	0	0	0	0	0	0	0	0	0	0	0	0	0	0	0	0	0	10
d__Bacteria	k__norank	p__Firmicutes	c__Clostridia	o__Clostridiales	f__Lachnospiraceae	g__norank_f__Lachnospiraceae	s__uncultured_rumen_bacterium_g__norank_f__Lachnospiraceae	OTU546	0	0	13	0	0	0	0	0	0	0	0	0	0	0	0	0	0	0	0	0	0	0	0	0	0	0	0	0	0	0	0	0	0	0	0	0	0	0	13
d__Bacteria	k__norank	p__Bacteroidetes	c__Bacteroidia	o__Bacteroidales	f__Rikenellaceae	g__Rikenellaceae_RC9_gut_group	s__unclassified_g__Rikenellaceae_RC9_gut_group	OTU985	0	0	0	0	17	0	0	0	0	0	0	0	0	0	0	0	0	0	0	0	0	0	0	0	0	0	0	0	0	0	0	0	0	0	0	0	0	0	17
d__Bacteria	k__norank	p__Cyanobacteria	c__Cyanobacteria	o__norank_c__Cyanobacteria	f__norank_c__Cyanobacteria	g__norank_c__Cyanobacteria	s__unclassified_g__norank_c__Cyanobacteria	OTU1456	0	0	0	0	0	0	0	0	0	0	0	0	0	0	0	0	0	0	9	5	16	1	5	0	1	2	4	0	0	0	0	0	0	0	0	0	0	0	43
d__Bacteria	k__norank	p__Firmicutes	c__Bacilli	o__Bacillales	f__Thermoactinomycetaceae	g__Laceyella	s__Laceyella_sacchari	OTU2164	0	0	0	0	0	0	0	0	0	0	0	0	0	0	0	0	0	0	0	0	0	0	0	0	0	0	0	0	0	0	0	0	0	0	0	0	3	0	3
d__Bacteria	k__norank	p__Chloroflexi	c__SJA-15	o__norank_c__SJA-15	f__norank_c__SJA-15	g__norank_c__SJA-15	s__uncultured_soil_bacterium_g__norank_c__SJA-15	OTU1769	0	0	8	0	0	0	0	0	0	0	0	0	0	0	0	0	0	0	9	18	6	19	9	4	0	2	1	13	0	0	0	0	10	0	0	0	0	0	99
d__Bacteria	k__norank	p__Proteobacteria	c__Alphaproteobacteria	o__Rhodobacterales	f__Rhodobacteraceae	g__Rubellimicrobium	s__unclassified_g__Rubellimicrobium	OTU1800	1	0	0	0	0	0	4	2	0	0	0	0	0	0	0	0	0	0	3	3	3	3	4	2	1	2	2	3	3	0	0	0	9	0	0	0	0	0	45
d__Bacteria	k__norank	p__Firmicutes	c__Erysipelotrichia	o__Erysipelotrichales	f__Erysipelotrichaceae	g__Erysipelotrichaceae_UCG-004	s__uncultured_rumen_bacterium_g__Erysipelotrichaceae_UCG-004	OTU386	0	0	29	2	0	4	0	0	0	0	0	0	0	0	0	0	0	0	0	0	0	0	0	0	0	0	0	0	0	0	0	0	0	0	0	0	0	0	35
d__Bacteria	k__norank	p__Bacteroidetes	c__Bacteroidia	o__Bacteroidales	f__Prevotellaceae	g__Prevotellaceae_UCG-001	s__unclassified_g__Prevotellaceae_UCG-001	OTU626	0	0	24	0	0	0	0	0	0	0	0	0	0	0	0	0	0	0	0	0	0	0	0	0	0	0	0	0	0	0	0	0	0	0	0	0	0	0	24
d__Bacteria	k__norank	p__Bacteroidetes	c__Bacteroidia	o__Bacteroidales	f__Prevotellaceae	g__Prevotellaceae_UCG-001	s__unclassified_g__Prevotellaceae_UCG-001	OTU332	0	18	10	0	0	0	0	0	0	0	0	0	0	0	0	0	0	0	0	0	0	0	0	0	0	0	0	0	0	0	0	0	0	0	0	0	0	0	28
d__Bacteria	k__norank	p__Bacteroidetes	c__Sphingobacteriia	o__Sphingobacteriales	f__Chitinophagaceae	g__Dinghuibacter	s__unclassified_g__Dinghuibacter	OTU1506	0	0	0	0	0	0	0	0	0	0	0	0	0	0	0	0	0	0	0	27	2	13	1	0	5	0	2	2	0	0	0	0	0	0	0	0	0	0	52
d__Bacteria	k__norank	p__Proteobacteria	c__Betaproteobacteria	o__Nitrosomonadales	f__Gallionellaceae	g__Sideroxydans	s__uncultured_bacterium_g__Sideroxydans	OTU45	25	0	0	9	0	0	0	0	0	0	0	0	0	0	0	0	0	0	0	0	0	0	0	0	0	0	0	0	0	0	0	0	0	0	0	0	0	0	34
d__Bacteria	k__norank	p__Bacteroidetes	c__Bacteroidia	o__Bacteroidales	f__Rikenellaceae	g__Rikenellaceae_RC9_gut_group	s__uncultured_bacterium_g__Rikenellaceae_RC9_gut_group	OTU1047	0	0	0	0	53	0	0	0	0	0	0	0	0	0	0	0	0	0	0	0	0	0	0	0	0	0	0	0	0	0	0	0	0	0	0	0	0	0	53
d__Bacteria	k__norank	p__Proteobacteria	c__Betaproteobacteria	o__unclassified_c__Betaproteobacteria	f__unclassified_c__Betaproteobacteria	g__unclassified_c__Betaproteobacteria	s__unclassified_c__Betaproteobacteria	OTU15	12	0	0	0	0	0	0	0	0	0	0	0	0	0	0	0	0	0	0	0	0	0	0	0	0	0	0	0	0	0	0	0	0	0	0	0	0	0	12
d__Bacteria	k__norank	p__Acidobacteria	c__Acidobacteria	o__norank_c__Acidobacteria	f__norank_c__Acidobacteria	g__norank_c__Acidobacteria	s__uncultured_bacterium_mle1-25	OTU1842	5	0	0	0	0	0	0	0	0	0	1	0	0	0	0	0	0	0	0	14	0	2	0	1	0	0	0	1	0	0	0	0	0	0	0	0	0	0	24
d__Bacteria	k__norank	p__Proteobacteria	c__Gammaproteobacteria	o__Aeromonadales	f__Aeromonadaceae	g__Aeromonas	s__Aeromonas_sobria	OTU1853	2	0	0	0	0	0	0	0	0	0	0	0	0	0	0	1	0	0	22	272	74	511	291	1464	2178	6156	1922	208	0	1	0	0	15	0	0	0	0	0	13117
d__Bacteria	k__norank	p__Firmicutes	c__Clostridia	o__Clostridiales	f__Lachnospiraceae	g__Coprococcus_1	s__unclassified_g__Coprococcus_1	OTU590	0	0	17	6	0	5	0	0	0	0	0	0	0	0	0	0	0	0	0	0	0	0	0	0	0	0	0	0	0	0	0	0	0	0	0	0	0	0	28
d__Bacteria	k__norank	p__Proteobacteria	c__Betaproteobacteria	o__Burkholderiales	f__Comamonadaceae	g__Inhella	s__unclassified_g__Inhella	OTU1747	6	0	6	2	1	1	0	0	0	0	0	0	0	0	0	0	0	0	4	0	0	5	0	1	0	0	0	0	0	0	0	0	0	0	0	0	0	0	26
d__Bacteria	k__norank	p__Proteobacteria	c__Deltaproteobacteria	o__Desulfuromonadales	f__Desulfuromonadaceae	g__Desulfuromonas	s__uncultured_rumen_bacterium_g__Desulfuromonas	OTU846	0	0	18	18	6	8	0	0	0	0	0	0	0	0	0	0	0	0	0	0	0	0	0	0	0	0	0	0	0	0	0	0	0	0	0	0	0	0	50
d__Bacteria	k__norank	p__Proteobacteria	c__Gammaproteobacteria	o__Xanthomonadales	f__Xanthomonadales_Incertae_Sedis	g__Acidibacter	s__unclassified_g__Acidibacter	OTU344	30	0	28	4	0	0	0	0	0	0	0	0	0	0	0	0	0	0	0	0	0	0	0	0	0	0	0	0	0	0	0	0	0	0	0	0	0	0	62
d__Bacteria	k__norank	p__Bacteroidetes	c__Bacteroidia	o__Bacteroidales	f__Bacteroidales_S24-7_group	g__norank_f__Bacteroidales_S24-7_group	s__uncultured_bacterium_g__norank_f__Bacteroidales_S24-7_group	OTU554	0	0	10	0	0	0	0	0	0	0	0	0	0	0	0	0	0	0	0	0	0	0	0	0	0	0	0	0	0	0	0	0	0	0	0	0	0	0	10
d__Bacteria	k__norank	p__Bacteroidetes	c__Flavobacteriia	o__Flavobacteriales	f__Flavobacteriaceae	g__Flavobacterium	s__unclassified_g__Flavobacterium	OTU1779	0	0	0	0	0	0	0	0	0	0	0	0	0	0	0	0	0	0	4	201	5	121	44	17	150	60	135	14	0	0	0	0	0	0	0	0	0	0	751
d__Bacteria	k__norank	p__Firmicutes	c__Clostridia	o__Clostridiales	f__Lachnospiraceae	g__Lachnoclostridium_12	s__uncultured_rumen_bacterium_g__Lachnoclostridium_12	OTU699	0	0	0	7	0	0	0	0	0	0	0	0	0	0	0	0	0	0	0	0	0	0	0	0	0	0	0	0	0	0	0	0	0	0	0	0	0	0	7
d__Bacteria	k__norank	p__Actinobacteria	c__Actinobacteria	o__Frankiales	f__Sporichthyaceae	g__hgcI_clade	s__uncultured_bacterium_g__hgcI_clade	OTU1825	0	0	0	0	0	0	0	0	0	0	0	0	0	0	0	0	0	0	0	0	2	0	11	0	0	0	0	0	0	0	0	0	0	0	0	0	0	0	13
d__Bacteria	k__norank	p__Firmicutes	c__Clostridia	o__Clostridiales	f__Lachnospiraceae	g__Acetitomaculum	s__uncultured_bacterium_g__Acetitomaculum	OTU1048	0	0	1	0	6	1	0	0	0	0	0	0	0	0	0	0	0	0	0	0	0	0	0	0	0	0	0	0	0	0	0	0	0	0	0	0	0	0	8
d__Bacteria	k__norank	p__Proteobacteria	c__Alphaproteobacteria	o__Sphingomonadales	f__Sphingomonadaceae	g__Sphingomonas	s__unclassified_g__Sphingomonas	OTU1308	0	14	4	0	0	4	0	3	0	0	0	0	0	0	0	0	0	0	0	0	0	0	0	0	0	0	0	0	1	11	0	14	137	0	0	0	0	0	188
d__Bacteria	k__norank	p__Firmicutes	c__Clostridia	o__Clostridiales	f__Christensenellaceae	g__Christensenellaceae_R-7_group	s__uncultured_bacterium_g__Christensenellaceae_R-7_group	OTU196	0	13	6	14	72	3	0	0	0	0	0	0	0	0	0	0	0	0	0	0	0	0	0	0	0	0	0	0	0	0	0	0	0	0	0	0	0	0	108
d__Bacteria	k__norank	p__Chlamydiae	c__Chlamydiae	o__Chlamydiales	f__unclassified_o__Chlamydiales	g__unclassified_o__Chlamydiales	s__unclassified_o__Chlamydiales	OTU1622	0	0	0	0	0	0	0	0	0	0	0	0	0	0	0	0	0	0	0	1	6	0	1	0	0	1	0	0	0	0	0	0	0	0	0	0	0	0	9
d__Bacteria	k__norank	p__Actinobacteria	c__Actinobacteria	o__Gaiellales	f__Gaiellaceae	g__Gaiella	s__uncultured_Rubrobacteria_bacterium_g__Gaiella	OTU396	0	0	13	0	2	0	0	0	0	0	0	0	0	0	0	0	0	0	0	0	0	0	0	0	0	0	0	0	0	0	0	0	0	0	0	0	0	0	15
d__Bacteria	k__norank	p__Cyanobacteria	c__Cyanobacteria	o__unclassified_c__Cyanobacteria	f__unclassified_c__Cyanobacteria	g__unclassified_c__Cyanobacteria	s__unclassified_c__Cyanobacteria	OTU1434	0	0	0	0	0	0	0	0	0	0	0	0	0	0	0	0	0	0	4	2	0	1	2	0	0	0	0	0	0	0	0	0	0	0	0	0	0	0	9
d__Bacteria	k__norank	p__unclassified_k__norank	c__unclassified_k__norank	o__unclassified_k__norank	f__unclassified_k__norank	g__unclassified_k__norank	s__unclassified_k__norank	OTU1150	0	0	0	0	0	6	0	0	0	0	0	0	0	0	0	0	0	0	0	0	0	0	0	0	0	0	0	0	0	0	0	0	0	0	0	0	0	0	6
d__Bacteria	k__norank	p__Chlamydiae	c__Chlamydiae	o__Chlamydiales	f__Parachlamydiaceae	g__Neochlamydia	s__uncultured_bacterium_g__Neochlamydia	OTU2137	0	0	0	0	0	0	0	3	0	0	0	0	0	2	0	0	0	0	0	3	2	0	0	0	0	1	0	1	0	0	0	0	6	0	0	0	0	0	18
d__Bacteria	k__norank	p__Bacteroidetes	c__Bacteroidia	o__Bacteroidales	f__Rikenellaceae	g__Rikenellaceae_RC9_gut_group	s__bacterium_enrichment_culture_clone_RB2a	OTU1131	0	0	0	0	0	9	0	0	0	0	0	0	0	0	0	0	0	0	0	0	0	0	0	0	0	0	0	0	0	0	0	0	0	0	0	0	0	0	9
d__Bacteria	k__norank	p__Proteobacteria	c__Deltaproteobacteria	o__Myxococcales	f__VHS-B3-70	g__norank_f__VHS-B3-70	s__uncultured_bacterium_g__norank_f__VHS-B3-70	OTU470	0	0	4	0	0	0	0	0	0	0	0	0	0	0	0	0	0	0	0	0	0	0	0	0	0	0	0	0	0	0	0	0	0	0	0	0	0	0	4
d__Bacteria	k__norank	p__Firmicutes	c__Bacilli	o__Lactobacillales	f__Enterococcaceae	g__Enterococcus	s__unclassified_g__Enterococcus	OTU2160	7	5	0	0	0	0	0	0	0	1	1	0	0	1	0	0	0	0	0	0	8	0	0	0	0	0	0	0	2	3	0	0	9	0	0	0	2	0	39
d__Bacteria	k__norank	p__Proteobacteria	c__Gammaproteobacteria	o__Methylococcales	f__Methylococcaceae	g__Methylomicrobium	s__uncultured_bacterium_g__Methylomicrobium	OTU1807	0	0	0	0	0	0	0	0	0	0	0	0	0	0	0	0	0	0	3	7	2	2	36	2	0	0	0	0	0	0	0	0	0	0	0	0	0	0	52
d__Bacteria	k__norank	p__Acidobacteria	c__Acidobacteria	o__Holophagales	f__Holophagaceae	g__norank_f__Holophagaceae	s__uncultured_Acidobacteria_bacterium_g__norank	OTU1641	0	0	0	0	0	0	0	0	0	0	0	0	0	0	0	0	0	0	0	0	10	0	0	0	1	1	0	0	0	0	0	0	2	0	0	0	1	0	15
d__Bacteria	k__norank	p__Proteobacteria	c__Alphaproteobacteria	o__Rhodobacterales	f__Rhodobacteraceae	g__Rubellimicrobium	s__uncultured_bacterium_g__Rubellimicrobium	OTU1415	0	15	0	0	0	0	1	4	0	0	0	0	0	2	0	0	0	0	0	0	0	0	0	0	0	0	0	0	7	2	0	8	69	0	0	0	0	0	108
d__Bacteria	k__norank	p__unclassified_k__norank	c__unclassified_k__norank	o__unclassified_k__norank	f__unclassified_k__norank	g__unclassified_k__norank	s__unclassified_k__norank	OTU1084	0	0	0	0	0	14	0	0	0	0	0	0	0	0	0	0	0	0	0	0	0	0	0	0	0	0	0	0	0	0	0	0	0	0	0	0	0	0	14
d__Bacteria	k__norank	p__Actinobacteria	c__Actinobacteria	o__norank_c__Actinobacteria	f__norank_c__Actinobacteria	g__norank_c__Actinobacteria	s__unclassified_g__norank_c__Actinobacteria	OTU921	0	0	0	0	8	0	0	0	0	0	0	0	0	0	0	0	0	0	0	0	0	0	0	0	0	0	0	0	0	0	0	0	0	0	0	0	0	0	8
d__Bacteria	k__norank	p__Actinobacteria	c__Actinobacteria	o__Pseudonocardiales	f__Pseudonocardiaceae	g__Pseudonocardia	s__unclassified_g__Pseudonocardia	OTU1388	0	0	0	0	0	0	0	0	0	0	35	0	0	0	0	0	0	0	0	0	0	0	0	0	0	0	0	0	0	0	0	0	0	0	0	0	0	0	35
d__Bacteria	k__norank	p__Actinobacteria	c__Actinobacteria	o__Corynebacteriales	f__Corynebacteriaceae	g__Corynebacterium_1	s__Corynebacterium_stationis	OTU42	3	0	0	0	0	0	0	0	0	0	0	0	0	0	0	0	0	0	0	0	0	0	0	0	0	0	0	0	1	0	0	0	1	0	0	0	0	0	5
d__Bacteria	k__norank	p__Bacteroidetes	c__Bacteroidia	o__Bacteroidales	f__Prevotellaceae	g__Prevotella_1	s__unclassified_g__Prevotella_1	OTU312	0	0	40	22	41	15	0	0	0	0	0	0	0	0	0	0	0	0	0	0	0	0	0	0	0	0	0	0	0	0	0	0	0	0	0	0	0	0	118
d__Bacteria	k__norank	p__Actinobacteria	c__Actinobacteria	o__Acidimicrobiales	f__norank_o__Acidimicrobiales	g__norank_o__Acidimicrobiales	s__unclassified_g__norank_o__Acidimicrobiales	OTU1439	1	0	0	0	0	0	0	1	0	0	3	0	0	0	0	0	0	0	11	15	16	9	11	7	4	4	6	5	0	3	0	1	8	0	0	0	0	0	105
d__Bacteria	k__norank	p__Firmicutes	c__Clostridia	o__Clostridiales	f__Lachnospiraceae	g__Fusicatenibacter	s__unclassified_g__Fusicatenibacter	OTU194	0	39	0	0	0	0	0	0	0	0	0	1	0	0	0	0	0	0	0	0	1	0	0	0	0	0	1	0	0	0	0	0	0	0	0	0	0	0	42
d__Bacteria	k__norank	p__Proteobacteria	c__Alphaproteobacteria	o__Rhodospirillales	f__Acetobacteraceae	g__Roseomonas	s__Roseomonas_lacus	OTU1317	0	0	0	0	0	0	0	2	0	0	0	0	0	1	0	0	0	0	3	2	1	2	1	2	1	0	0	0	0	2	0	0	6	0	0	0	0	0	23
d__Bacteria	k__norank	p__Bacteroidetes	c__Bacteroidia	o__Bacteroidales	f__Rikenellaceae	g__Rikenellaceae_RC9_gut_group	s__uncultured_rumen_bacterium_g__Rikenellaceae_RC9_gut_group	OTU1177	0	11	72	83	137	73	0	0	0	0	0	0	0	0	0	0	0	0	0	0	0	0	0	0	0	0	0	0	0	0	0	0	0	0	0	0	0	0	376
d__Bacteria	k__norank	p__Proteobacteria	c__Deltaproteobacteria	o__Syntrophobacterales	f__Syntrophobacteraceae	g__unclassified_f__Syntrophobacteraceae	s__unclassified_f__Syntrophobacteraceae	OTU1591	0	0	0	0	0	0	0	0	0	0	0	0	0	0	0	0	0	0	0	0	12	0	0	0	0	0	0	0	0	0	0	0	1	0	0	0	0	0	13
d__Bacteria	k__norank	p__Firmicutes	c__Clostridia	o__Clostridiales	f__Clostridiaceae_1	g__Clostridium_sensu_stricto_1	s__Clostridium_butyricum	OTU1288	0	7	2	4	0	7	24	49	1	4	6	0	0	3	0	0	0	0	23	15	24	15	19	9	3	6	0	8	30	43	5	10	321	0	0	1	0	0	639
d__Bacteria	k__norank	p__Actinobacteria	c__Actinobacteria	o__Micrococcales	f__Intrasporangiaceae	g__unclassified_f__Intrasporangiaceae	s__unclassified_f__Intrasporangiaceae	OTU2076	0	0	0	0	0	0	0	0	0	0	0	0	0	0	0	0	0	0	0	0	0	0	0	0	0	0	0	0	6	2	0	8	67	0	0	0	0	0	83
d__Bacteria	k__norank	p__Tenericutes	c__Mollicutes	o__Anaeroplasmatales	f__Anaeroplasmataceae	g__Anaeroplasma	s__uncultured_rumen_bacterium_g__Anaeroplasma	OTU1205	0	0	0	0	8	8	0	0	0	0	0	0	0	0	0	0	0	0	0	0	0	0	0	0	0	0	0	0	0	0	0	0	0	0	0	0	0	0	16
d__Bacteria	k__norank	p__Actinobacteria	c__Actinobacteria	o__Acidimicrobiales	f__norank_o__Acidimicrobiales	g__norank_o__Acidimicrobiales	s__Actinobacteria_bacterium_IMCC26256	OTU1850	0	0	0	0	0	1	0	0	0	0	0	0	0	0	0	0	0	0	5	9	5	5	3	2	3	1	1	5	0	1	0	0	1	0	0	0	0	0	42
d__Bacteria	k__norank	p__Bacteroidetes	c__Bacteroidia	o__Bacteroidales	f__Prevotellaceae	g__unclassified_f__Prevotellaceae	s__unclassified_f__Prevotellaceae	OTU82	21	0	0	0	0	0	0	0	0	0	0	0	0	0	0	0	0	0	0	0	0	0	0	0	0	0	0	0	0	0	0	0	0	0	0	0	0	0	21
d__Bacteria	k__norank	p__Firmicutes	c__Bacilli	o__Lactobacillales	f__Streptococcaceae	g__Streptococcus	s__unclassified_g__Streptococcus	OTU2099	0	2	0	0	0	0	0	6	0	0	0	0	0	1	0	0	0	0	0	0	0	0	0	0	1	0	0	0	0	0	0	0	2	0	0	0	0	1	13
d__Bacteria	k__norank	p__Bacteroidetes	c__Bacteroidia	o__Bacteroidales	f__Bacteroidales_BS11_gut_group	g__norank_f__Bacteroidales_BS11_gut_group	s__uncultured_bacterium_g__norank_f__Bacteroidales_BS11_gut_group	OTU272	0	0	20	2	38	2	0	0	0	0	0	0	0	0	0	0	0	0	0	0	0	0	0	0	0	0	0	0	0	0	0	0	0	0	0	0	0	0	62
d__Bacteria	k__norank	p__Firmicutes	c__Clostridia	o__Clostridiales	f__Lachnospiraceae	g__Shuttleworthia	s__uncultured_bacterium_g__Shuttleworthia	OTU483	0	10	47	52	119	18	0	0	0	0	0	0	0	0	0	0	0	0	0	0	0	0	0	0	0	0	0	0	0	0	0	0	0	0	0	0	0	0	246
d__Bacteria	k__norank	p__Firmicutes	c__Clostridia	o__Clostridiales	f__Family_XIII	g__[Eubacterium]_nodatum_group	s__unclassified_g__[Eubacterium]_nodatum_group	OTU796	0	0	0	0	20	0	0	0	0	0	0	0	0	0	0	0	0	0	0	0	0	0	0	0	0	0	0	0	0	0	0	0	0	0	0	0	0	0	20
d__Bacteria	k__norank	p__Actinobacteria	c__Actinobacteria	o__Gaiellales	f__norank_o__Gaiellales	g__norank_o__Gaiellales	s__unclassified_g__norank_o__Gaiellales	OTU1694	0	0	0	0	0	0	0	0	0	0	0	0	0	0	0	0	0	0	5	4	26	4	8	2	2	3	1	0	0	0	0	0	0	0	0	0	0	0	55
d__Bacteria	k__norank	p__Actinobacteria	c__Actinobacteria	o__Micrococcales	f__Microbacteriaceae	g__Microbacterium	s__Microbacterium_oxydans_g__Microbacterium	OTU1221	3	5	13	7	13	24	36	61	13	25	15	0	0	51	1	0	0	0	0	1	7	0	0	1	1	0	0	0	0	8	1	2	50	0	0	1	0	0	339
d__Bacteria	k__norank	p__Proteobacteria	c__Deltaproteobacteria	o__Sva0485	f__norank_o__Sva0485	g__norank_o__Sva0485	s__uncultured_Desulfuromonadales_bacterium_g__norank_o__Sva0485	OTU149	13	0	0	0	0	0	0	0	0	0	0	0	0	0	0	0	0	0	3	9	0	7	1	2	1	0	1	1	0	0	0	0	0	0	0	0	0	0	38
d__Bacteria	k__norank	p__Firmicutes	c__Bacilli	o__Bacillales	f__Planococcaceae	g__Kurthia	s__uncultured_bacterium_g__Kurthia	OTU263	7	8	0	1	2	0	0	0	0	1	0	0	0	0	0	0	0	0	0	0	0	0	0	0	0	0	0	0	1	1	0	0	7	0	0	0	0	0	28
d__Bacteria	k__norank	p__Proteobacteria	c__Betaproteobacteria	o__Burkholderiales	f__Alcaligenaceae	g__norank_f__Alcaligenaceae	s__unclassified_g__norank_f__Alcaligenaceae	OTU1522	0	0	0	0	0	0	0	0	0	0	0	0	0	0	0	0	0	0	72	108	21	57	16	12	10	4	16	9	0	0	0	0	0	0	0	0	0	0	325
d__Bacteria	k__norank	p__Bacteroidetes	c__Bacteroidia	o__Bacteroidales	f__Rikenellaceae	g__Rikenellaceae_RC9_gut_group	s__unclassified_g__Rikenellaceae_RC9_gut_group	OTU1237	0	0	0	0	0	11	0	0	0	0	0	0	0	0	0	0	0	0	0	0	0	0	0	0	0	0	0	0	0	0	0	0	0	0	0	0	0	0	11
d__Bacteria	k__norank	p__Firmicutes	c__Clostridia	o__Clostridiales	f__Ruminococcaceae	g__unclassified_f__Ruminococcaceae	s__unclassified_f__Ruminococcaceae	OTU1246	0	18	10	0	0	4	0	0	0	0	0	0	0	0	0	0	0	0	0	0	0	0	0	0	0	0	0	0	0	0	0	0	0	0	0	0	0	0	32
d__Bacteria	k__norank	p__Actinobacteria	c__Actinobacteria	o__Acidimicrobiales	f__norank_o__Acidimicrobiales	g__norank_o__Acidimicrobiales	s__uncultured_actinobacterium_g__norank_o__Acidimicrobiales	OTU681	0	0	6	17	0	0	0	0	0	0	0	0	0	0	0	0	0	0	0	0	0	0	0	0	0	0	0	0	0	0	0	0	0	0	0	0	0	0	23
d__Bacteria	k__norank	p__Firmicutes	c__Bacilli	o__Bacillales	f__Bacillaceae	g__Oceanobacillus	s__Oceanobacillus_caeni	OTU2156	0	0	0	0	0	0	0	0	0	12	3	0	0	0	0	0	0	0	0	0	0	0	0	0	0	0	0	0	0	0	0	0	0	0	0	0	15	2	32
d__Bacteria	k__norank	p__Chloroflexi	c__Anaerolineae	o__Anaerolineales	f__Anaerolineaceae	g__norank_f__Anaerolineaceae	s__uncultured_Caldilineaceae_bacterium_g__norank_f__Anaerolineaceae	OTU814	0	0	0	0	43	0	0	0	0	0	0	0	0	0	0	0	0	0	0	0	0	0	0	0	0	0	0	0	0	0	0	0	0	0	0	0	0	0	43
d__Bacteria	k__norank	p__unclassified_k__norank	c__unclassified_k__norank	o__unclassified_k__norank	f__unclassified_k__norank	g__unclassified_k__norank	s__unclassified_k__norank	OTU1379	7	0	0	1	0	0	2	1	0	0	3	0	0	0	0	0	0	0	0	0	0	0	0	0	0	0	0	0	0	0	0	0	0	0	0	0	0	0	14
d__Bacteria	k__norank	p__Saccharibacteria	c__norank_p__Saccharibacteria	o__norank_p__Saccharibacteria	f__norank_p__Saccharibacteria	g__norank_p__Saccharibacteria	s__unclassified_g__norank_p__Saccharibacteria	OTU2085	0	0	0	0	0	0	0	1	0	0	0	0	0	0	0	0	0	0	0	0	0	0	0	0	0	0	0	0	5	9	1	9	77	0	0	0	0	0	102
d__Bacteria	k__norank	p__Planctomycetes	c__OM190	o__norank_c__OM190	f__norank_c__OM190	g__norank_c__OM190	s__planctomycete_A-2	OTU1512	0	0	0	0	0	0	0	0	0	0	0	0	0	0	0	0	0	0	2	7	1	3	0	3	0	3	1	2	0	0	0	0	0	0	0	0	0	0	22
d__Bacteria	k__norank	p__unclassified_k__norank	c__unclassified_k__norank	o__unclassified_k__norank	f__unclassified_k__norank	g__unclassified_k__norank	s__unclassified_k__norank	OTU1371	0	0	0	0	0	0	1	4	0	20	1	0	0	0	0	0	0	0	0	0	2	0	0	0	0	0	0	0	0	0	0	0	0	0	0	0	1	0	29
d__Bacteria	k__norank	p__Firmicutes	c__Clostridia	o__Clostridiales	f__Lachnospiraceae	g__unclassified_f__Lachnospiraceae	s__unclassified_f__Lachnospiraceae	OTU1024	0	0	0	0	14	0	0	0	0	0	0	0	0	0	0	0	0	0	0	0	0	0	0	0	0	0	0	0	0	0	0	0	0	0	0	0	0	0	14
d__Bacteria	k__norank	p__Proteobacteria	c__Alphaproteobacteria	o__Sphingomonadales	f__Sphingomonadaceae	g__Sphingomonas	s__unclassified_g__Sphingomonas	OTU2113	0	0	13	0	0	1	0	0	0	0	0	0	0	1	0	0	0	0	0	0	1	1	2	0	1	0	0	0	2	5	0	2	130	0	1	0	0	0	160
d__Bacteria	k__norank	p__Firmicutes	c__Bacilli	o__Lactobacillales	f__Lactobacillaceae	g__Lactobacillus	s__Lactobacillus_johnsonii	OTU291	24	2	5	0	42	0	0	0	0	0	0	0	0	0	1	0	0	0	0	0	63	0	0	0	0	1	0	0	0	1	0	0	0	0	1	0	0	0	140
d__Bacteria	k__norank	p__Verrucomicrobia	c__WCHB1-41	o__norank_c__WCHB1-41	f__norank_c__WCHB1-41	g__norank_c__WCHB1-41	s__uncultured_rumen_bacterium_g__norank_c__WCHB1-41	OTU1059	0	0	22	42	149	29	0	0	0	0	0	0	0	0	0	0	0	0	0	0	0	0	0	0	0	0	0	0	0	0	0	0	0	0	0	0	0	0	242
d__Bacteria	k__norank	p__Cyanobacteria	c__Cyanobacteria	o__norank_c__Cyanobacteria	f__norank_c__Cyanobacteria	g__norank_c__Cyanobacteria	s__unclassified_g__norank_c__Cyanobacteria	OTU1924	0	0	0	0	0	0	0	0	0	0	0	0	0	0	0	0	0	0	3	7	0	0	0	4	2	1	0	0	0	0	0	0	0	0	0	0	0	0	17
d__Bacteria	k__norank	p__Proteobacteria	c__Alphaproteobacteria	o__Rhodobacterales	f__Rhodobacteraceae	g__Gemmobacter	s__uncultured_bacterium_g__Gemmobacter	OTU2024	17	39	27	51	2	38	0	2	2	4	10	0	0	135	0	0	0	0	11	22	6	11	11	2	0	2	5	7	45	102	0	28	599	0	0	0	0	0	1178
d__Bacteria	k__norank	p__Cyanobacteria	c__Cyanobacteria	o__norank_c__Cyanobacteria	f__norank_c__Cyanobacteria	g__norank_c__Cyanobacteria	s__unclassified_g__norank_c__Cyanobacteria	OTU1923	0	0	0	0	0	0	0	0	0	0	0	0	0	0	0	0	0	0	2	0	0	0	0	0	0	1	0	0	0	0	0	0	0	0	0	0	0	0	3
d__Bacteria	k__norank	p__Verrucomicrobia	c__Spartobacteria	o__Chthoniobacterales	f__Chthoniobacteraceae	g__Chthoniobacter	s__unclassified_g__Chthoniobacter	OTU1459	0	0	0	0	0	0	0	0	0	0	0	0	0	0	0	0	0	0	14	5	10	2	0	6	0	2	0	1	0	0	0	0	0	0	0	0	0	0	40
d__Bacteria	k__norank	p__Chloroflexi	c__Anaerolineae	o__Anaerolineales	f__Anaerolineaceae	g__norank_f__Anaerolineaceae	s__anaerobic_bacterium_MO-CFX2	OTU1697	0	0	0	0	0	0	0	0	0	0	0	0	0	0	0	0	0	0	0	0	6	0	0	1	0	0	0	0	0	0	0	0	0	0	0	0	0	0	7
d__Bacteria	k__norank	p__Proteobacteria	c__Alphaproteobacteria	o__Rhizobiales	f__Hyphomicrobiaceae	g__norank_f__Hyphomicrobiaceae	s__unclassified_g__norank_f__Hyphomicrobiaceae	OTU1283	0	0	0	0	0	0	1	0	0	0	0	0	0	0	0	0	0	0	0	0	10	0	0	0	0	0	0	0	0	0	0	0	0	0	0	0	0	0	11
d__Bacteria	k__norank	p__Chlamydiae	c__Chlamydiae	o__Chlamydiales	f__Simkaniaceae	g__Candidatus_Rhabdochlamydia	s__unclassified_g__Candidatus_Rhabdochlamydia	OTU85	5	0	0	0	0	0	0	0	0	0	0	0	0	1	0	0	0	0	0	0	0	0	0	0	0	0	0	0	0	0	0	0	0	0	0	0	0	0	6
d__Bacteria	k__norank	p__Actinobacteria	c__Actinobacteria	o__Acidimicrobiales	f__Acidimicrobiales_Incertae_Sedis	g__Candidatus_Microthrix	s__unclassified_g__Candidatus_Microthrix	OTU1970	0	0	3	0	0	0	0	1	0	0	0	0	0	0	0	0	0	0	4	11	11	9	3	2	0	3	0	4	0	0	0	1	3	0	0	0	0	0	55
d__Bacteria	k__norank	p__Actinobacteria	c__Actinobacteria	o__Propionibacteriales	f__Nocardioidaceae	g__Nocardioides	s__unclassified_g__Nocardioides	OTU1303	20	7	0	0	0	2	18	2	0	1	28	0	0	0	0	0	0	0	1	1	5	1	1	0	0	0	0	0	0	1	0	0	14	0	0	0	0	0	102
d__Bacteria	k__norank	p__Actinobacteria	c__Actinobacteria	o__unclassified_c__Actinobacteria	f__unclassified_c__Actinobacteria	g__unclassified_c__Actinobacteria	s__unclassified_c__Actinobacteria	OTU821	0	0	0	0	3	0	0	0	0	0	0	0	0	0	0	0	0	0	0	0	0	0	0	0	0	0	0	0	0	0	0	0	0	0	0	0	0	0	3
d__Bacteria	k__norank	p__Proteobacteria	c__Gammaproteobacteria	o__Enterobacteriales	f__Enterobacteriaceae	g__Enterobacter	s__unclassified_g__Enterobacter	OTU2151	1303	2611	4242	2633	2681	7058	2183	75	2	90	614	1	78	233	49	0	104	0	0	2	5	5	9	0	2	14	4	1	58	58	22	8	33	16	12213	28970	205	4735	70317
d__Bacteria	k__norank	p__Parcubacteria	c__norank_p__Parcubacteria	o__norank_p__Parcubacteria	f__norank_p__Parcubacteria	g__norank_p__Parcubacteria	s__uncultured_bacterium_g__norank_p__Parcubacteria	OTU612	0	0	29	0	0	0	0	0	0	0	0	0	0	0	0	0	0	0	0	0	0	0	0	0	0	0	0	0	0	0	0	0	0	0	0	0	0	0	29
d__Bacteria	k__norank	p__Bacteroidetes	c__Bacteroidia	o__Bacteroidales	f__Rikenellaceae	g__Rikenellaceae_RC9_gut_group	s__Bacteroidales_bacterium_Bact_15	OTU648	0	0	0	8	0	0	0	0	0	0	0	0	0	0	0	0	0	0	0	0	0	0	0	0	0	0	0	0	0	0	0	0	0	0	0	0	0	0	8
d__Bacteria	k__norank	p__Firmicutes	c__Clostridia	o__Clostridiales	f__Clostridiales_vadinBB60_group	g__norank_f__Clostridiales_vadinBB60_group	s__uncultured_bacterium_g__norank_f__Clostridiales_vadinBB60_group	OTU917	0	0	0	0	13	0	0	0	0	0	0	0	0	0	0	0	0	0	0	0	0	0	0	0	0	0	0	0	0	0	0	0	0	0	0	0	0	0	13
d__Bacteria	k__norank	p__Firmicutes	c__Clostridia	o__Clostridiales	f__Peptostreptococcaceae	g__Peptostreptococcus	s__unclassified_g__Peptostreptococcus	OTU1359	4	0	0	0	0	0	1	1	0	11	5	0	0	0	0	0	0	0	0	0	0	0	0	0	0	0	0	0	48	105	1	30	684	0	0	1	9	2	902
d__Bacteria	k__norank	p__Firmicutes	c__Erysipelotrichia	o__Erysipelotrichales	f__Erysipelotrichaceae	g__unclassified_f__Erysipelotrichaceae	s__unclassified_f__Erysipelotrichaceae	OTU1130	0	0	0	0	6	15	0	0	0	0	0	0	0	0	0	0	0	0	0	0	0	0	0	0	0	0	0	0	0	0	0	0	0	0	0	0	0	0	21
d__Bacteria	k__norank	p__Bacteroidetes	c__Bacteroidia	o__Bacteroidales	f__Prevotellaceae	g__Prevotella_1	s__unclassified_g__Prevotella_1	OTU861	0	0	19	0	12	0	0	0	0	0	0	0	0	0	0	0	0	0	0	0	0	0	0	0	0	0	0	0	0	0	0	0	0	0	0	0	0	0	31
d__Bacteria	k__norank	p__Proteobacteria	c__Betaproteobacteria	o__Nitrosomonadales	f__Gallionellaceae	g__Sideroxydans	s__uncultured_bacterium_g__Sideroxydans	OTU74	5	9	0	0	0	0	0	0	0	0	0	0	0	4	1	0	0	0	0	0	0	0	0	0	0	0	0	0	0	0	0	0	0	0	0	0	0	0	19
d__Bacteria	k__norank	p__Bacteroidetes	c__Bacteroidia	o__Bacteroidales	f__Prevotellaceae	g__Prevotella_1	s__unclassified_g__Prevotella_1	OTU869	0	0	0	0	8	0	0	0	0	0	0	0	0	0	0	0	0	0	0	0	0	0	0	0	0	0	0	0	0	0	0	0	0	0	0	0	0	0	8
d__Bacteria	k__norank	p__Proteobacteria	c__Betaproteobacteria	o__Burkholderiales	f__Comamonadaceae	g__Curvibacter	s__uncultured_Curvibacter_sp._g__Curvibacter	OTU212	1	15	0	0	0	1	2	0	0	4	0	0	1	0	0	0	0	0	0	0	0	0	0	0	0	0	0	0	0	0	0	0	0	0	0	0	0	0	24
d__Bacteria	k__norank	p__Cyanobacteria	c__Cyanobacteria	o__SubsectionI	f__FamilyI_o__SubsectionI	g__Snowella	s__uncultured_bacterium_g__Snowella	OTU1676	0	0	0	0	0	0	0	0	0	0	0	0	0	0	0	0	0	0	1	1	2	0	1	0	1	0	0	0	0	0	0	0	0	0	0	0	0	0	6
d__Bacteria	k__norank	p__Acidobacteria	c__Acidobacteria	o__norank_c__Acidobacteria	f__norank_c__Acidobacteria	g__norank_c__Acidobacteria	s__unclassified_g__norank_c__Acidobacteria	OTU1041	0	0	0	0	12	0	0	0	0	0	0	0	0	0	0	0	0	0	0	0	0	0	0	0	0	0	0	0	0	0	0	0	0	0	0	0	0	0	12
d__Bacteria	k__norank	p__Firmicutes	c__Clostridia	o__Clostridiales	f__Family_XI_o__Clostridiales	g__Peptoniphilus	s__unclassified_g__Peptoniphilus	OTU1330	0	0	0	0	0	0	0	6	0	0	0	0	0	0	0	0	0	0	0	0	0	0	0	0	0	0	0	0	0	0	0	0	0	0	0	0	6	0	12
d__Bacteria	k__norank	p__Acidobacteria	c__Acidobacteria	o__norank_c__Acidobacteria	f__norank_c__Acidobacteria	g__norank_c__Acidobacteria	s__Acidobacteria_bacterium_DSM_100886	OTU1532	0	0	0	0	0	0	0	0	0	0	0	0	0	0	0	0	0	0	1	11	0	0	0	0	3	0	0	0	0	0	0	0	0	0	0	0	0	0	15
d__Bacteria	k__norank	p__Acidobacteria	c__Acidobacteria	o__norank_c__Acidobacteria	f__norank_c__Acidobacteria	g__norank_c__Acidobacteria	s__Acidobacteria_bacterium_CB_286306	OTU106	3	0	0	0	0	0	0	0	0	0	0	0	0	0	0	0	0	0	0	0	0	0	0	0	0	0	0	0	0	0	0	0	0	0	0	0	0	0	3
d__Bacteria	k__norank	p__Bacteroidetes	c__Bacteroidia	o__Bacteroidales	f__Prevotellaceae	g__Prevotellaceae_UCG-001	s__unclassified_g__Prevotellaceae_UCG-001	OTU1153	0	0	59	25	50	37	0	0	0	0	0	0	0	0	0	0	0	0	0	0	0	0	0	0	0	0	0	0	0	0	0	0	0	0	0	0	0	0	171
d__Bacteria	k__norank	p__Bacteroidetes	c__Bacteroidia	o__Bacteroidales	f__Bacteroidales_S24-7_group	g__norank_f__Bacteroidales_S24-7_group	s__uncultured_rumen_bacterium_g__norank_f__Bacteroidales_S24-7_group	OTU984	0	13	20	34	120	37	0	0	0	0	0	0	0	0	0	0	0	0	0	0	0	0	0	0	0	0	0	0	0	0	0	0	0	0	0	0	0	0	224
d__Bacteria	k__norank	p__Firmicutes	c__Erysipelotrichia	o__Erysipelotrichales	f__Erysipelotrichaceae	g__Erysipelotrichaceae_UCG-009	s__uncultured_rumen_bacterium_g__Erysipelotrichaceae_UCG-009	OTU565	0	0	15	0	0	0	0	0	0	0	0	0	0	0	0	0	0	0	0	0	0	0	0	0	0	0	0	0	0	0	0	0	0	0	0	0	0	0	15
d__Bacteria	k__norank	p__Proteobacteria	c__Alphaproteobacteria	o__Rickettsiales	f__Anaplasmataceae	g__Candidatus_Xenohaliotis	s__uncultured_bacterium_g__Candidatus_Xenohaliotis	OTU1249	83	76	25	9	7	17	0	2	1	0	0	0	1	2	0	0	0	0	0	0	0	0	0	0	0	0	0	0	3	0	0	0	1	0	0	0	0	0	227
d__Bacteria	k__norank	p__Bacteroidetes	c__Bacteroidia	o__Bacteroidales	f__Rikenellaceae	g__Rikenellaceae_RC9_gut_group	s__uncultured_rumen_bacterium_g__Rikenellaceae_RC9_gut_group	OTU825	0	0	0	0	18	0	0	0	0	0	0	0	0	0	0	0	0	0	0	0	0	0	0	0	0	0	0	0	0	0	0	0	0	0	0	0	0	0	18
d__Bacteria	k__norank	p__Proteobacteria	c__Gammaproteobacteria	o__Methylococcales	f__Methylococcaceae	g__Methyloparacoccus	s__unclassified_g__Methyloparacoccus	OTU2093	0	0	0	0	0	0	7	5	0	0	0	0	0	0	0	0	0	0	0	0	0	0	0	0	0	0	0	0	1	1	0	0	2	0	0	0	0	0	16
d__Bacteria	k__norank	p__Acidobacteria	c__Acidobacteria	o__unclassified_c__Acidobacteria	f__unclassified_c__Acidobacteria	g__unclassified_c__Acidobacteria	s__unclassified_c__Acidobacteria	OTU334	0	0	19	0	0	0	0	0	0	0	0	0	0	0	0	0	0	0	0	0	0	0	0	0	0	0	0	0	0	0	0	0	0	0	0	0	0	0	19
d__Bacteria	k__norank	p__Chloroflexi	c__KD4-96	o__norank_c__KD4-96	f__norank_c__KD4-96	g__norank_c__KD4-96	s__uncultured_bacterium_g__norank_c__KD4-96	OTU1841	0	0	0	0	0	1	2	1	0	1	0	0	0	0	0	0	0	0	52	62	66	20	24	23	9	22	0	12	0	3	1	1	7	0	0	0	0	0	307
d__Bacteria	k__norank	p__Proteobacteria	c__Alphaproteobacteria	o__Rhodobacterales	f__Rhodobacteraceae	g__Tropicimonas	s__uncultured_bacterium_g__Tropicimonas	OTU1261	0	0	0	0	0	0	10	2	0	0	0	0	0	0	0	0	0	0	22	40	28	21	28	8	0	7	2	8	3	4	0	1	33	0	0	0	0	0	217
d__Bacteria	k__norank	p__Planctomycetes	c__Planctomycetacia	o__Planctomycetales	f__Planctomycetaceae	g__norank_f__Planctomycetaceae	s__uncultured_bacterium_g__norank_f__Planctomycetaceae	OTU1967	0	0	0	0	0	0	0	0	0	0	0	0	0	0	0	0	0	0	59	105	72	45	44	65	6	16	5	18	0	0	0	0	1	0	0	0	0	0	436
d__Bacteria	k__norank	p__Bacteroidetes	c__Flavobacteriia	o__Flavobacteriales	f__Flavobacteriaceae	g__Epilithonimonas	s__unclassified_g__Epilithonimonas	OTU204	119	53	0	11	1	51	0	0	0	0	1	0	0	0	0	0	0	0	0	0	0	0	0	0	0	0	0	0	0	0	0	0	0	0	0	0	0	0	236
d__Bacteria	k__norank	p__Gemmatimonadetes	c__Gemmatimonadetes	o__norank_c__Gemmatimonadetes	f__norank_c__Gemmatimonadetes	g__norank_c__Gemmatimonadetes	s__unclassified_g__norank_c__Gemmatimonadetes	OTU277	0	0	12	0	0	0	0	0	0	0	0	0	0	0	0	0	0	0	0	0	0	0	0	0	0	0	0	0	0	0	0	0	0	0	0	0	0	0	12
d__Bacteria	k__norank	p__Chlamydiae	c__Chlamydiae	o__Chlamydiales	f__Parachlamydiaceae	g__Neochlamydia	s__unclassified_g__Neochlamydia	OTU1638	0	0	0	0	0	0	0	0	0	0	0	0	0	0	0	0	0	0	0	1	4	0	5	1	0	0	0	0	0	0	0	0	0	0	0	0	0	0	11
d__Bacteria	k__norank	p__Proteobacteria	c__Gammaproteobacteria	o__Chromatiales	f__Chromatiaceae	g__Allochromatium	s__Allochromatium_phaeobacterium	OTU1327	0	0	0	0	0	0	0	9	0	0	0	0	0	0	0	0	0	0	0	0	0	0	0	0	0	0	0	0	0	1	0	0	6	0	0	0	0	0	16
d__Bacteria	k__norank	p__Bacteroidetes	c__Cytophagia	o__Cytophagales	f__Cytophagaceae	g__Hymenobacter	s__uncultured_bacterium_g__Hymenobacter	OTU1273	0	0	0	0	0	0	8	0	0	0	0	0	0	0	0	0	0	0	0	0	0	0	0	0	0	0	0	0	0	0	0	0	0	0	0	0	0	0	8
d__Bacteria	k__norank	p__Bacteroidetes	c__Cytophagia	o__Cytophagales	f__MWH-CFBk5	g__norank_f__MWH-CFBk5	s__Bacteroidetes_bacterium_MWH-CFBk5	OTU568	0	0	23	0	0	0	0	0	0	0	0	0	0	0	0	0	0	0	0	0	0	0	0	0	0	0	0	0	0	0	0	0	0	0	0	0	0	0	23
d__Bacteria	k__norank	p__Planctomycetes	c__Phycisphaerae	o__Phycisphaerales	f__norank_o__Phycisphaerales	g__norank_o__Phycisphaerales	s__unclassified_g__norank_o__Phycisphaerales	OTU584	0	0	3	0	0	0	0	0	0	0	0	0	0	0	0	0	0	0	0	0	0	0	0	0	0	0	0	0	0	0	0	0	1	0	0	0	0	0	4
d__Bacteria	k__norank	p__Bacteroidetes	c__Bacteroidia	o__Bacteroidales	f__Bacteroidales_S24-7_group	g__norank_f__Bacteroidales_S24-7_group	s__uncultured_rumen_bacterium_g__norank_f__Bacteroidales_S24-7_group	OTU857	0	0	0	4	35	0	0	0	0	0	0	0	0	0	0	0	0	0	0	0	0	0	0	0	0	0	0	0	0	0	0	0	0	0	0	0	0	0	39
d__Bacteria	k__norank	p__Tenericutes	c__Mollicutes	o__Mollicutes_RF9	f__norank_o__Mollicutes_RF9	g__norank_o__Mollicutes_RF9	s__uncultured_rumen_bacterium_g__norank_o__Mollicutes_RF9	OTU1174	0	0	0	7	0	12	0	0	0	0	0	0	0	0	0	0	0	0	0	0	0	0	0	0	0	0	0	0	0	0	0	0	0	0	0	0	0	0	19
d__Bacteria	k__norank	p__Firmicutes	c__Clostridia	o__Clostridiales	f__Lachnospiraceae	g__Blautia	s__unclassified_g__Blautia	OTU1240	0	0	0	0	0	7	0	0	0	0	0	0	0	0	0	0	0	0	0	0	0	0	0	0	0	0	0	0	0	0	0	0	1	0	0	0	0	0	8
d__Bacteria	k__norank	p__Cyanobacteria	c__Cyanobacteria	o__norank_c__Cyanobacteria	f__norank_c__Cyanobacteria	g__norank_c__Cyanobacteria	s__unclassified_g__norank_c__Cyanobacteria	OTU1465	0	0	0	0	0	0	0	0	0	0	0	0	0	0	0	0	0	0	2	5	4	0	0	3	1	2	0	0	0	0	0	0	0	0	0	0	0	0	17
d__Bacteria	k__norank	p__Proteobacteria	c__Betaproteobacteria	o__Neisseriales	f__Neisseriaceae	g__Vitreoscilla	s__uncultured_bacterium_g__Vitreoscilla	OTU1111	95	152	62	242	30	160	70	35	0	115	57	0	0	0	0	0	0	0	0	0	0	0	0	0	0	0	0	0	0	0	0	0	0	0	0	0	0	0	1018
d__Bacteria	k__norank	p__Bacteroidetes	c__Flavobacteriia	o__Flavobacteriales	f__Flavobacteriaceae	g__Flavobacterium	s__unclassified_g__Flavobacterium	OTU1173	7	0	0	0	0	10	0	0	0	0	0	0	0	0	0	0	0	0	0	0	0	0	0	0	0	0	0	0	0	0	0	0	0	0	0	0	0	0	17
d__Bacteria	k__norank	p__Proteobacteria	c__Betaproteobacteria	o__Burkholderiales	f__Oxalobacteraceae	g__Undibacterium	s__uncultured_Burkholderiales_bacterium_g__Undibacterium	OTU1366	0	0	0	0	0	2	0	0	0	19	0	0	0	0	0	0	0	0	0	0	0	0	0	0	0	0	0	0	0	0	0	0	0	0	0	0	0	0	21
d__Bacteria	k__norank	p__Firmicutes	c__Clostridia	o__Clostridiales	f__Clostridiaceae_1	g__Clostridium_sensu_stricto_1	s__unclassified_g__Clostridium_sensu_stricto_1	OTU1395	0	0	0	0	0	0	0	0	76	5	5	0	81	31	53	0	1	0	0	0	0	0	0	0	0	0	0	0	0	0	0	1	0	0	1	0	2	0	256
d__Bacteria	k__norank	p__Proteobacteria	c__Gammaproteobacteria	o__Pseudomonadales	f__Moraxellaceae	g__Acinetobacter	s__unclassified_g__Acinetobacter	OTU253	15	4	12	4	18	12	2	0	0	4	1	0	0	3	0	0	0	0	0	0	3	0	1	0	0	0	0	0	2	0	0	0	0	0	0	0	0	1	82
d__Bacteria	k__norank	p__Bacteroidetes	c__Bacteroidia	o__Bacteroidales	f__Bacteroidaceae	g__Bacteroides	s__Bacteroides_stercoris_ATCC_43183	OTU485	0	0	6	0	0	0	0	0	0	0	0	0	0	0	0	0	0	0	0	0	0	0	0	0	0	0	0	0	0	0	0	0	0	0	0	0	0	0	6
d__Bacteria	k__norank	p__Cyanobacteria	c__Cyanobacteria	o__norank_c__Cyanobacteria	f__norank_c__Cyanobacteria	g__norank_c__Cyanobacteria	s__Euglena_chadefaudii	OTU1911	0	0	0	0	0	0	0	0	0	0	0	0	0	0	0	0	0	0	16	10	0	4	4	23	10	19	3	5	0	0	0	0	0	0	0	0	0	0	94
d__Bacteria	k__norank	p__Cyanobacteria	c__Cyanobacteria	o__norank_c__Cyanobacteria	f__norank_c__Cyanobacteria	g__norank_c__Cyanobacteria	s__unclassified_g__norank_c__Cyanobacteria	OTU1661	0	0	0	0	0	0	0	0	0	0	0	0	0	0	0	0	0	0	3	4	6	1	4	0	0	1	1	1	0	1	0	0	1	0	0	0	0	0	23
d__Bacteria	k__norank	p__unclassified_k__norank	c__unclassified_k__norank	o__unclassified_k__norank	f__unclassified_k__norank	g__unclassified_k__norank	s__unclassified_k__norank	OTU716	0	0	0	8	0	0	0	0	0	0	0	0	0	0	0	0	0	0	0	0	0	0	0	0	0	0	0	0	0	0	0	1	0	0	0	0	0	0	9
d__Bacteria	k__norank	p__Tenericutes	c__Mollicutes	o__Mollicutes_RF9	f__norank_o__Mollicutes_RF9	g__norank_o__Mollicutes_RF9	s__uncultured_prokaryote_g__norank_o__Mollicutes_RF9	OTU831	0	0	0	0	19	0	0	0	0	0	0	0	0	0	0	0	0	0	0	0	0	0	0	0	0	0	0	0	0	0	0	0	0	0	0	0	0	0	19
d__Bacteria	k__norank	p__Actinobacteria	c__Actinobacteria	o__Micrococcales	f__Microbacteriaceae	g__Leucobacter	s__uncultured_Leucobacter_sp.	OTU1231	3	4	8	39	19	113	13	35	1	88	26	0	0	9	0	0	0	0	0	0	1	0	38	0	0	0	0	0	7	6	0	10	49	0	0	0	0	0	469
d__Bacteria	k__norank	p__Chlamydiae	c__Chlamydiae	o__Chlamydiales	f__unclassified_o__Chlamydiales	g__unclassified_o__Chlamydiales	s__unclassified_o__Chlamydiales	OTU1533	0	0	0	0	0	0	0	0	0	0	0	0	0	0	0	0	0	0	2	12	4	0	0	1	2	2	0	0	0	0	0	0	0	0	0	0	0	0	23
d__Bacteria	k__norank	p__Proteobacteria	c__Alphaproteobacteria	o__Rhodospirillales	f__Rhodospirillaceae	g__Defluviicoccus	s__unclassified_g__Defluviicoccus	OTU2014	0	0	0	0	0	0	0	0	0	0	0	0	0	0	0	0	0	0	0	0	0	0	0	0	0	0	0	0	4	0	0	0	24	0	0	0	0	0	28
d__Bacteria	k__norank	p__Tenericutes	c__Mollicutes	o__Mollicutes_RF9	f__norank_o__Mollicutes_RF9	g__norank_o__Mollicutes_RF9	s__uncultured_bacterium_g__norank_o__Mollicutes_RF9	OTU805	0	0	0	0	38	0	0	0	0	0	0	0	0	0	0	0	0	0	0	0	0	0	0	0	0	0	0	0	0	0	0	0	0	0	0	0	0	0	38
d__Bacteria	k__norank	p__Proteobacteria	c__Betaproteobacteria	o__TRA3-20	f__norank_o__TRA3-20	g__norank_o__TRA3-20	s__unclassified_g__norank_o__TRA3-20	OTU244	0	21	0	0	0	0	0	0	0	0	0	0	0	0	0	0	0	0	0	0	0	0	0	0	0	0	0	0	0	0	0	0	0	0	0	0	0	0	21
d__Bacteria	k__norank	p__Acidobacteria	c__Acidobacteria	o__norank_c__Acidobacteria	f__norank_c__Acidobacteria	g__norank_c__Acidobacteria	s__unclassified_g__norank_c__Acidobacteria	OTU1739	5	0	0	0	0	0	0	0	0	0	0	0	0	0	0	0	0	0	35	98	6	13	15	3	6	1	3	5	0	0	0	0	0	0	0	0	0	0	190
d__Bacteria	k__norank	p__Firmicutes	c__Clostridia	o__Clostridiales	f__Lachnospiraceae	g__unclassified_f__Lachnospiraceae	s__unclassified_f__Lachnospiraceae	OTU986	0	0	0	0	42	0	0	0	0	0	0	0	0	0	0	0	0	0	0	0	0	0	0	0	0	0	0	0	0	0	0	0	0	0	0	0	0	0	42
d__Bacteria	k__norank	p__Firmicutes	c__Clostridia	o__Clostridiales	f__Ruminococcaceae	g__Ruminiclostridium_1	s__unclassified_g__Ruminiclostridium_1	OTU122	10	0	0	0	0	0	0	0	0	0	0	0	0	0	0	0	0	0	0	0	0	0	0	0	0	0	0	0	0	0	0	0	0	0	0	0	0	0	10
d__Bacteria	k__norank	p__Actinobacteria	c__Actinobacteria	o__Frankiales	f__Nakamurellaceae	g__Nakamurella	s__uncultured_bacterium_g__Nakamurella	OTU2140	0	0	0	0	0	0	0	0	0	0	1	0	0	0	0	0	0	0	0	0	0	0	0	0	0	0	0	0	0	1	0	0	6	0	0	0	0	0	8
d__Bacteria	k__norank	p__unclassified_k__norank	c__unclassified_k__norank	o__unclassified_k__norank	f__unclassified_k__norank	g__unclassified_k__norank	s__unclassified_k__norank	OTU398	0	0	4	0	0	0	0	0	0	0	0	0	0	0	0	0	0	0	0	0	0	0	0	0	0	0	0	0	0	0	0	0	0	0	0	0	0	0	4
d__Bacteria	k__norank	p__Acidobacteria	c__Acidobacteria	o__Blastocatellales	f__Blastocatellaceae__Subgroup_4_	g__RB41	s__unclassified_g__RB41	OTU319	6	0	24	0	1	0	0	0	0	0	0	0	0	0	0	0	0	0	0	0	0	0	0	0	0	0	0	0	0	0	0	0	0	0	0	0	0	0	31
d__Bacteria	k__norank	p__Chloroflexi	c__unclassified_p__Chloroflexi	o__unclassified_p__Chloroflexi	f__unclassified_p__Chloroflexi	g__unclassified_p__Chloroflexi	s__unclassified_p__Chloroflexi	OTU1748	0	0	0	0	0	0	0	0	0	0	0	0	0	0	0	0	0	0	2	2	4	2	1	4	0	0	0	1	0	0	0	0	0	0	0	0	0	0	16
d__Bacteria	k__norank	p__Firmicutes	c__Clostridia	o__Clostridiales	f__Lachnospiraceae	g__Blautia	s__unclassified_g__Blautia	OTU68	46	0	0	1	0	0	0	0	0	0	0	0	0	0	0	0	0	0	0	0	0	0	0	0	0	0	0	0	0	0	0	0	0	0	0	0	0	0	47
d__Bacteria	k__norank	p__Actinobacteria	c__Actinobacteria	o__Micrococcales	f__Micrococcaceae	g__Kocuria	s__Kocuria_rhizophila	OTU1277	0	0	7	1	5	0	12	20	0	3	1	0	0	2	0	0	0	0	0	0	0	0	0	0	0	0	0	0	1	0	0	1	5	0	0	0	0	0	58
d__Bacteria	k__norank	p__Actinobacteria	c__Actinobacteria	o__Gaiellales	f__norank_o__Gaiellales	g__norank_o__Gaiellales	s__unclassified_g__norank_o__Gaiellales	OTU1640	0	0	0	0	0	0	0	0	0	0	0	0	0	0	0	0	0	0	3	4	10	1	4	0	0	2	1	0	0	0	0	0	0	0	0	0	0	0	25
d__Bacteria	k__norank	p__Verrucomicrobia	c__WCHB1-41	o__norank_c__WCHB1-41	f__norank_c__WCHB1-41	g__norank_c__WCHB1-41	s__uncultured_Verrucomicrobia_bacterium_g__norank_c__WCHB1-41	OTU1890	0	0	0	0	0	0	0	0	0	0	0	0	0	0	0	0	0	0	1	4	0	1	0	0	1	0	0	0	0	0	0	0	0	0	0	0	0	0	7
d__Bacteria	k__norank	p__Firmicutes	c__Clostridia	o__Clostridiales	f__Christensenellaceae	g__Christensenellaceae_R-7_group	s__unclassified_g__Christensenellaceae_R-7_group	OTU874	0	0	8	1	18	0	0	0	0	0	0	0	0	0	0	0	0	0	0	0	0	0	0	0	0	0	0	0	0	0	0	0	0	0	0	0	0	0	27
d__Bacteria	k__norank	p__Chloroflexi	c__unclassified_p__Chloroflexi	o__unclassified_p__Chloroflexi	f__unclassified_p__Chloroflexi	g__unclassified_p__Chloroflexi	s__unclassified_p__Chloroflexi	OTU1588	0	0	0	0	0	0	0	0	0	0	0	0	0	0	0	0	0	0	3	6	2	2	0	1	0	0	0	0	0	0	0	0	0	0	0	0	0	0	14
d__Bacteria	k__norank	p__Firmicutes	c__Clostridia	o__Clostridiales	f__Ruminococcaceae	g__Ruminococcaceae_UCG-010	s__unclassified_g__Ruminococcaceae_UCG-010	OTU937	0	0	1	0	51	0	0	0	0	0	0	0	0	0	0	0	0	0	0	0	0	0	0	0	0	0	0	0	0	0	0	0	0	0	0	0	0	0	52
d__Bacteria	k__norank	p__Firmicutes	c__Clostridia	o__Clostridiales	f__Ruminococcaceae	g__Ruminococcaceae_UCG-010	s__unclassified_g__Ruminococcaceae_UCG-010	OTU1114	0	0	6	0	13	6	0	0	0	0	0	0	0	0	0	0	0	0	0	0	0	0	0	0	0	0	0	0	0	0	0	0	0	0	0	0	0	0	25
d__Bacteria	k__norank	p__Chloroflexi	c__Anaerolineae	o__Anaerolineales	f__Anaerolineaceae	g__norank_f__Anaerolineaceae	s__unclassified_g__norank_f__Anaerolineaceae	OTU1862	0	0	0	0	0	0	0	0	0	0	0	0	0	0	0	0	0	0	29	46	57	13	18	21	8	12	5	12	0	0	0	0	3	0	0	0	0	0	224
d__Bacteria	k__norank	p__Actinobacteria	c__Actinobacteria	o__Solirubrobacterales	f__Elev-16S-1332	g__norank_f__Elev-16S-1332	s__unclassified_g__norank_f__Elev-16S-1332	OTU798	0	0	4	0	20	0	0	0	0	0	0	0	0	0	0	0	0	0	0	0	1	1	0	1	0	0	0	0	0	0	0	0	1	0	0	0	0	0	28
d__Bacteria	k__norank	p__Chloroflexi	c__SJA-15	o__norank_c__SJA-15	f__norank_c__SJA-15	g__norank_c__SJA-15	s__uncultured_bacterium_g__norank_c__SJA-15	OTU1684	0	0	0	0	0	0	0	3	0	0	0	0	0	0	0	0	0	0	11	14	35	16	2	3	1	1	2	5	0	0	1	0	3	0	0	0	0	0	97
d__Bacteria	k__norank	p__Proteobacteria	c__Gammaproteobacteria	o__norank_c__Gammaproteobacteria	f__norank_c__Gammaproteobacteria	g__norank_c__Gammaproteobacteria	s__uncultured_gamma_proteobacterium_g__norank_c__Gammaproteobacteria	OTU454	0	0	13	0	0	0	0	0	0	0	0	0	0	0	0	0	0	0	0	0	0	0	0	0	0	0	0	0	0	0	0	0	0	0	0	0	0	0	13
d__Bacteria	k__norank	p__Proteobacteria	c__Deltaproteobacteria	o__Oligoflexales	f__Oligoflexaceae	g__norank_f__Oligoflexaceae	s__unclassified_g__norank_f__Oligoflexaceae	OTU1650	0	0	0	0	0	0	0	0	0	0	0	0	0	0	0	0	0	0	0	0	3	0	0	0	0	0	0	1	0	0	0	0	0	0	0	0	0	0	4
d__Bacteria	k__norank	p__Bacteroidetes	c__Cytophagia	o__Cytophagales	f__Cyclobacteriaceae	g__unclassified_f__Cyclobacteriaceae	s__unclassified_f__Cyclobacteriaceae	OTU1351	0	0	0	0	0	0	0	23	0	0	0	0	0	0	0	0	0	0	0	0	0	0	0	0	0	0	0	0	0	0	0	0	0	0	0	0	0	0	23
d__Bacteria	k__norank	p__Cyanobacteria	c__Cyanobacteria	o__SubsectionIII	f__FamilyI_o__SubsectionIII	g__Microcoleus	s__uncultured_bacterium_g__Microcoleus	OTU2115	0	0	0	0	0	0	0	0	0	0	0	0	0	0	0	0	0	0	0	0	0	0	0	0	0	0	0	0	2	6	0	1	39	0	0	0	0	0	48
d__Bacteria	k__norank	p__Verrucomicrobia	c__Spartobacteria	o__Chthoniobacterales	f__unclassified_o__Chthoniobacterales	g__unclassified_o__Chthoniobacterales	s__unclassified_o__Chthoniobacterales	OTU1453	0	0	0	0	0	0	0	0	0	0	0	0	0	0	0	0	0	0	26	14	3	5	4	8	3	1	1	3	0	0	0	0	0	0	0	0	0	0	68
d__Bacteria	k__norank	p__Firmicutes	c__Clostridia	o__Clostridiales	f__Ruminococcaceae	g__Ruminiclostridium_5	s__unclassified_g__Ruminiclostridium_5	OTU399	0	0	19	0	0	0	0	0	0	0	0	0	0	0	0	0	0	0	0	0	0	0	0	0	0	0	0	0	0	0	0	0	0	0	0	0	0	0	19
d__Bacteria	k__norank	p__Actinobacteria	c__Actinobacteria	o__Corynebacteriales	f__Corynebacteriaceae	g__Corynebacterium_1	s__Corynebacterium_freneyi	OTU2044	0	0	3	0	3	1	2	5	0	1	0	1	0	0	0	0	0	0	0	0	0	0	0	0	0	0	0	0	4	6	0	3	71	0	0	0	0	0	100
d__Bacteria	k__norank	p__unclassified_k__norank	c__unclassified_k__norank	o__unclassified_k__norank	f__unclassified_k__norank	g__unclassified_k__norank	s__unclassified_k__norank	OTU139	19	0	0	0	0	0	0	0	0	0	0	0	0	0	0	0	0	0	0	0	0	0	0	0	0	0	0	0	0	0	0	0	0	0	0	0	0	0	19
d__Bacteria	k__norank	p__Omnitrophica	c__norank_p__Omnitrophica	o__norank_p__Omnitrophica	f__norank_p__Omnitrophica	g__norank_p__Omnitrophica	s__uncultured_bacterium_g__norank_p__Omnitrophica	OTU1515	0	0	0	0	0	0	0	0	0	0	0	0	0	0	0	0	0	0	0	1	0	0	2	1	0	0	0	0	0	0	0	0	0	0	0	0	0	0	4
d__Bacteria	k__norank	p__Bacteroidetes	c__Bacteroidia	o__Bacteroidales	f__Porphyromonadaceae	g__Macellibacteroides	s__uncultured_bacterium_g__Macellibacteroides	OTU2032	0	0	0	0	0	0	0	0	0	0	0	0	0	0	0	0	0	0	0	0	0	0	0	0	0	0	0	0	7560	4	241	4	30	0	0	0	0	0	7839
d__Bacteria	k__norank	p__Actinobacteria	c__Actinobacteria	o__Propionibacteriales	f__Nocardioidaceae	g__Marmoricola	s__uncultured_bacterium_g__Marmoricola	OTU1394	11	0	0	0	1	0	6	1	0	0	20	0	0	0	0	0	0	0	2	1	0	1	1	0	0	0	0	0	0	2	0	1	5	0	0	0	0	0	52
d__Bacteria	k__norank	p__Actinobacteria	c__Actinobacteria	o__Propionibacteriales	f__Propionibacteriaceae	g__norank_f__Propionibacteriaceae	s__uncultured_Actinomycetales_bacterium_g__norank_f__Propionibacteriaceae	OTU2003	0	0	0	0	0	0	0	0	0	0	0	0	0	0	0	0	0	0	9	19	28	14	2	8	3	4	1	9	0	0	0	0	1	0	0	0	0	0	98
d__Bacteria	k__norank	p__Bacteroidetes	c__Sphingobacteriia	o__Sphingobacteriales	f__norank_o__Sphingobacteriales	g__norank_o__Sphingobacteriales	s__uncultured_Cytophagales_bacterium_g__norank_o__Sphingobacteriales	OTU1698	0	0	0	0	0	0	0	0	0	0	0	0	0	0	0	0	0	0	0	0	2	0	0	0	0	0	0	0	1	1	0	0	5	0	0	0	0	0	9
d__Bacteria	k__norank	p__unclassified_k__norank	c__unclassified_k__norank	o__unclassified_k__norank	f__unclassified_k__norank	g__unclassified_k__norank	s__unclassified_k__norank	OTU1709	0	0	0	0	0	0	0	0	0	0	0	0	0	0	0	0	0	0	0	2	9	1	2	1	0	0	0	0	0	0	0	0	0	0	0	0	0	0	15
d__Bacteria	k__norank	p__Elusimicrobia	c__Elusimicrobia	o__Lineage_IIb	f__norank_o__Lineage_IIb	g__norank_o__Lineage_IIb	s__uncultured_bacterium_g__norank_o__Lineage_IIb	OTU902	0	0	0	0	3	0	0	0	0	0	0	0	0	0	0	0	0	0	0	0	0	0	0	0	0	0	0	0	0	0	0	0	0	0	0	0	0	0	3
d__Bacteria	k__norank	p__Cyanobacteria	c__Cyanobacteria	o__norank_c__Cyanobacteria	f__norank_c__Cyanobacteria	g__norank_c__Cyanobacteria	s__Synechococcus_sp._PCC_7902	OTU1331	0	0	0	0	0	0	0	5	0	0	1	0	0	0	0	0	0	0	0	0	0	0	0	0	0	0	0	0	1	3	0	1	4	0	0	0	0	0	15
d__Bacteria	k__norank	p__Proteobacteria	c__Alphaproteobacteria	o__Rhodobacterales	f__Rhodobacteraceae	g__Rhodobacter	s__unclassified_g__Rhodobacter	OTU1795	8	0	0	7	0	12	7	1	0	1	20	0	0	1	0	0	0	0	2	0	11	0	6	0	0	0	0	0	3	12	0	2	50	0	0	0	0	0	143
d__Bacteria	k__norank	p__Deinococcus-Thermus	c__Deinococci	o__Deinococcales	f__Deinococcaceae	g__Deinococcus	s__Deinococcus_aquaticus	OTU684	37	0	6	10	0	95	0	0	0	0	0	0	0	0	0	0	0	0	0	0	0	0	0	0	0	0	0	0	0	0	0	0	3	0	0	0	0	0	151
d__Bacteria	k__norank	p__Firmicutes	c__Erysipelotrichia	o__Erysipelotrichales	f__Erysipelotrichaceae	g__unclassified_f__Erysipelotrichaceae	s__unclassified_f__Erysipelotrichaceae	OTU527	0	0	19	0	0	0	0	0	0	0	0	0	0	0	0	0	0	0	0	0	0	0	0	0	0	0	0	0	0	0	0	0	0	0	0	0	0	0	19
d__Bacteria	k__norank	p__Acidobacteria	c__Acidobacteria	o__norank_c__Acidobacteria	f__norank_c__Acidobacteria	g__norank_c__Acidobacteria	s__uncultured_proteobacterium_g__norank_c__Acidobacteria	OTU644	0	0	0	12	0	0	0	0	0	0	0	0	0	0	0	0	0	0	0	0	0	0	0	0	0	0	0	0	0	0	0	0	0	0	0	0	0	0	12
d__Bacteria	k__norank	p__Spirochaetae	c__Spirochaetes	o__Spirochaetales	f__PL-11B10	g__norank_f__PL-11B10	s__uncultured_rumen_bacterium_g__norank_f__PL-11B10	OTU779	0	0	0	11	20	0	0	0	0	0	0	0	0	0	0	0	0	0	0	0	0	0	0	0	0	0	0	0	0	0	0	0	0	0	0	0	0	0	31
d__Bacteria	k__norank	p__Firmicutes	c__Clostridia	o__Clostridiales	f__Christensenellaceae	g__Christensenellaceae_R-7_group	s__human_gut_metagenome_g__Christensenellaceae_R-7_group	OTU1247	0	0	7	46	51	56	0	0	0	0	0	0	0	0	0	0	0	0	0	0	0	0	0	0	0	0	0	0	0	0	0	0	0	0	0	0	0	0	160
d__Bacteria	k__norank	p__Firmicutes	c__Clostridia	o__Clostridiales	f__Clostridiales_vadinBB60_group	g__norank_f__Clostridiales_vadinBB60_group	s__unclassified_g__norank_f__Clostridiales_vadinBB60_group	OTU303	0	0	21	0	0	2	0	0	0	0	0	0	0	0	0	0	0	0	0	0	0	0	0	0	0	0	0	0	0	0	0	0	0	0	0	0	0	0	23
d__Bacteria	k__norank	p__Planctomycetes	c__Planctomycetacia	o__Planctomycetales	f__Planctomycetaceae	g__Singulisphaera	s__unclassified_g__Singulisphaera	OTU1546	0	0	0	0	0	0	0	0	0	0	0	0	0	0	0	0	0	0	3	3	5	1	2	4	0	3	0	0	0	0	0	0	0	0	0	0	0	0	21
d__Bacteria	k__norank	p__unclassified_k__norank	c__unclassified_k__norank	o__unclassified_k__norank	f__unclassified_k__norank	g__unclassified_k__norank	s__unclassified_k__norank	OTU1781	0	0	0	0	0	0	0	0	0	0	0	0	0	0	0	0	0	0	1	0	0	0	9	0	0	0	0	0	0	0	0	0	0	0	0	0	0	0	10
d__Bacteria	k__norank	p__Firmicutes	c__Clostridia	o__Clostridiales	f__Lachnospiraceae	g__Lachnospiraceae_UCG-008	s__unclassified_g__Lachnospiraceae_UCG-008	OTU742	0	0	15	10	0	0	0	0	0	0	0	0	0	0	0	0	0	0	0	0	0	0	0	0	0	0	0	0	0	0	0	0	0	0	0	0	0	0	25
d__Bacteria	k__norank	p__Proteobacteria	c__Deltaproteobacteria	o__Desulfovibrionales	f__Desulfovibrionaceae	g__Desulfovibrio	s__unclassified_g__Desulfovibrio	OTU530	0	0	12	0	0	0	0	0	0	0	0	0	0	0	0	0	0	0	0	0	0	0	0	0	0	0	0	0	0	0	0	0	0	0	0	0	0	0	12
d__Bacteria	k__norank	p__Firmicutes	c__Bacilli	o__Bacillales	f__Planococcaceae	g__Lysinibacillus	s__unclassified_g__Lysinibacillus	OTU1082	1	13	0	0	11	3	0	1	0	2	1	1	0	0	0	0	0	0	1	0	0	0	0	0	0	0	0	0	0	2	0	0	9	0	0	0	1	0	46
d__Bacteria	k__norank	p__Chloroflexi	c__Thermomicrobia	o__JG30-KF-CM45	f__norank_o__JG30-KF-CM45	g__norank_o__JG30-KF-CM45	s__uncultured_soil_bacterium_g__norank_o__JG30-KF-CM45	OTU1503	2	0	0	0	0	0	0	3	1	0	1	0	0	0	0	0	0	0	3	4	4	2	0	0	0	1	1	2	2	9	0	5	30	0	0	0	0	0	70
d__Bacteria	k__norank	p__unclassified_k__norank	c__unclassified_k__norank	o__unclassified_k__norank	f__unclassified_k__norank	g__unclassified_k__norank	s__unclassified_k__norank	OTU1141	0	0	0	0	0	10	0	0	0	0	0	0	0	0	0	0	0	0	0	0	0	0	0	0	0	0	0	0	0	0	0	0	0	0	0	0	0	0	10
d__Bacteria	k__norank	p__Proteobacteria	c__Deltaproteobacteria	o__Myxococcales	f__unclassified_o__Myxococcales	g__unclassified_o__Myxococcales	s__unclassified_o__Myxococcales	OTU1784	0	0	0	0	0	0	0	0	0	0	0	0	0	0	0	0	0	0	1	1	0	0	2	0	0	0	0	0	0	0	0	0	0	0	0	0	0	0	4
d__Bacteria	k__norank	p__Proteobacteria	c__Alphaproteobacteria	o__Rhodobacterales	f__Rhodobacteraceae	g__unclassified_f__Rhodobacteraceae	s__unclassified_f__Rhodobacteraceae	OTU1586	0	0	0	0	0	0	0	0	0	0	0	0	0	0	0	0	0	0	0	0	1619	0	32	0	0	0	0	0	0	0	0	0	0	0	0	0	0	0	1651
d__Bacteria	k__norank	p__Firmicutes	c__Bacilli	o__Bacillales	f__Thermoactinomycetaceae	g__Kroppenstedtia	s__unclassified_g__Kroppenstedtia	OTU1031	0	0	0	0	21	0	0	0	0	0	0	0	0	0	0	0	0	0	0	0	0	0	0	0	0	0	0	0	0	0	0	0	0	0	1	0	0	0	22
d__Bacteria	k__norank	p__Proteobacteria	c__Alphaproteobacteria	o__Rhodobacterales	f__Rhodobacteraceae	g__unclassified_f__Rhodobacteraceae	s__unclassified_f__Rhodobacteraceae	OTU1584	0	0	0	0	0	0	0	0	0	0	0	0	0	0	0	0	0	0	0	0	298	0	0	0	1	0	0	0	0	0	0	0	0	0	0	0	0	0	299
d__Bacteria	k__norank	p__Proteobacteria	c__Betaproteobacteria	o__SC-I-84	f__norank_o__SC-I-84	g__norank_o__SC-I-84	s__uncultured_prokaryote_g__norank_o__SC-I-84	OTU1732	0	6	0	0	0	0	0	0	0	0	0	0	0	0	0	0	0	0	86	115	47	94	30	30	9	23	17	21	0	0	1	0	1	0	0	0	0	0	480
d__Bacteria	k__norank	p__Firmicutes	c__Erysipelotrichia	o__Erysipelotrichales	f__Erysipelotrichaceae	g__[Anaerorhabdus]_furcosa_group	s__uncultured_bacterium_g__[Anaerorhabdus]_furcosa_group	OTU697	0	0	8	6	11	3	0	0	0	0	0	0	0	0	0	0	0	0	0	0	0	0	0	0	0	0	0	0	0	0	0	0	0	0	0	0	0	0	28
d__Bacteria	k__norank	p__Firmicutes	c__Clostridia	o__Clostridiales	f__Lachnospiraceae	g__Lachnospiraceae_NK4A136_group	s__unclassified_g__Lachnospiraceae_NK4A136_group	OTU260	0	26	14	0	0	0	0	0	0	0	0	0	0	0	0	0	0	0	0	0	0	0	0	0	0	0	0	0	0	0	0	0	0	0	0	0	0	0	40
d__Bacteria	k__norank	p__Proteobacteria	c__Deltaproteobacteria	o__Syntrophobacterales	f__Syntrophaceae	g__Desulfobacca	s__uncultured_bacterium_g__Desulfobacca	OTU1936	0	0	0	0	0	0	0	0	0	0	0	0	0	0	0	0	0	0	6	7	3	3	0	2	0	1	0	0	0	0	0	0	1	0	0	0	0	0	23
d__Bacteria	k__norank	p__Bacteroidetes	c__Bacteroidia	o__Bacteroidales	f__Rikenellaceae	g__Rikenellaceae_RC9_gut_group	s__uncultured_bacterium_g__Rikenellaceae_RC9_gut_group	OTU1056	0	0	3	0	17	1	0	0	0	0	0	0	0	0	0	0	0	0	0	0	0	0	0	0	0	0	0	0	0	0	0	0	0	0	0	0	0	0	21
d__Bacteria	k__norank	p__Proteobacteria	c__Betaproteobacteria	o__Burkholderiales	f__Alcaligenaceae	g__norank_f__Alcaligenaceae	s__Azonexus_sp._HME6654	OTU154	22	0	0	0	0	2	0	0	0	0	0	0	0	0	0	0	0	0	0	0	0	0	0	0	0	0	0	0	0	0	0	0	0	0	0	0	0	0	24
d__Bacteria	k__norank	p__Proteobacteria	c__Gammaproteobacteria	o__Legionellales	f__Coxiellaceae	g__Aquicella	s__unclassified_g__Aquicella	OTU405	0	0	6	0	0	0	0	0	0	0	0	0	0	0	0	0	0	0	0	1	0	0	0	0	0	1	0	0	0	0	0	0	0	0	0	0	0	0	8
d__Bacteria	k__norank	p__Proteobacteria	c__Gammaproteobacteria	o__Pseudomonadales	f__Moraxellaceae	g__Acinetobacter	s__unclassified_g__Acinetobacter	OTU1383	13270	11899	8850	3191	594	5649	134	184	1	7152	5443	3	4	15	1	0	0	0	0	0	2	0	7	0	0	0	0	0	4	8	0	0	14	0	8	0	1	2	56436
d__Bacteria	k__norank	p__Firmicutes	c__Clostridia	o__Clostridiales	f__Ruminococcaceae	g__Ruminococcaceae_UCG-010	s__unidentified_rumen_bacterium_RFN17	OTU231	0	5	0	0	0	7	0	0	0	0	0	0	0	0	0	0	0	0	0	0	0	0	0	0	0	0	0	0	0	0	0	0	0	0	0	0	0	0	12
d__Bacteria	k__norank	p__Bacteroidetes	c__Bacteroidia	o__Bacteroidales	f__Rikenellaceae	g__Rikenellaceae_RC9_gut_group	s__uncultured_bacterium_g__Rikenellaceae_RC9_gut_group	OTU1185	0	0	0	4	39	5	0	0	0	0	0	0	0	0	0	0	0	0	0	0	0	0	0	0	0	0	0	0	0	0	0	0	0	0	0	0	0	0	48
d__Bacteria	k__norank	p__Firmicutes	c__Clostridia	o__Clostridiales	f__Eubacteriaceae	g__Acetobacterium	s__unclassified_g__Acetobacterium	OTU2097	0	3	10	0	0	0	0	2	0	2	1	0	0	0	0	0	0	0	1	0	8	0	0	0	0	0	0	0	2	10	0	1	144	0	0	0	0	0	184
d__Bacteria	k__norank	p__Proteobacteria	c__Alphaproteobacteria	o__Rhodobacterales	f__Rhodobacteraceae	g__Paracoccus	s__unclassified_g__Paracoccus	OTU2054	9	43	109	18	11	27	35	76	1	5	2	1	1	44	0	0	0	0	0	0	0	1	0	0	0	0	0	0	37	34	0	10	420	0	0	1	2	0	887
d__Bacteria	k__norank	p__Bacteroidetes	c__Cytophagia	o__Cytophagales	f__Cytophagaceae	g__Pontibacter	s__Pontibacter_roseus_DSM_17521	OTU408	0	0	8	0	0	0	0	0	0	0	0	0	0	0	0	0	0	0	0	0	0	0	0	0	0	0	0	0	0	0	0	0	0	0	0	0	0	0	8
d__Bacteria	k__norank	p__Actinobacteria	c__Actinobacteria	o__Frankiales	f__unclassified_o__Frankiales	g__unclassified_o__Frankiales	s__unclassified_o__Frankiales	OTU1978	0	0	0	0	0	0	0	0	0	0	0	0	0	0	0	0	0	0	6	7	8	4	7	2	2	2	1	6	0	0	0	0	0	0	0	0	0	0	45
d__Bacteria	k__norank	p__Bacteroidetes	c__Flavobacteriia	o__Flavobacteriales	f__Flavobacteriaceae	g__Flavobacterium	s__unclassified_g__Flavobacterium	OTU1767	0	0	0	0	0	0	0	0	0	0	0	0	0	0	0	0	0	0	2	60	1	98	17	1	106	17	64	2	0	0	0	0	0	0	0	0	0	0	368
d__Bacteria	k__norank	p__Actinobacteria	c__Actinobacteria	o__Coriobacteriales	f__Coriobacteriaceae	g__Parvibacter	s__Parvibacter_caecicola	OTU322	0	0	12	0	0	0	0	0	0	0	0	0	0	0	0	0	0	0	0	0	0	0	0	0	0	0	0	0	0	0	0	0	0	0	0	0	0	0	12
d__Bacteria	k__norank	p__Proteobacteria	c__Deltaproteobacteria	o__Oligoflexales	f__Oligoflexaceae	g__norank_f__Oligoflexaceae	s__uncultured_bacterium_g__norank_f__Oligoflexaceae	OTU1435	0	0	0	0	0	0	0	0	0	0	0	0	0	0	0	0	0	0	267	312	286	184	90	113	27	77	54	76	0	0	0	0	3	0	0	0	0	0	1489
d__Bacteria	k__norank	p__Proteobacteria	c__Alphaproteobacteria	o__Rickettsiales	f__Rickettsiales_Incertae_Sedis	g__norank_f__Rickettsiales_Incertae_Sedis	s__uncultured_prokaryote_g__norank_f__Rickettsiales_Incertae_Sedis	OTU1879	0	0	0	0	0	0	0	1	0	0	0	0	0	0	0	0	0	0	50	44	48	49	9	26	18	11	16	14	0	0	0	0	0	0	0	0	0	0	286
d__Bacteria	k__norank	p__Saccharibacteria	c__Unknown_Class_p__Saccharibacteria	o__Unknown_Order_c__Unknown_Class_p__Saccharibacteria	f__Unknown_Family_o__Unknown_Order_c__Unknown_Class_p__Saccharibacteria	g__Candidatus_Saccharimonas	s__uncultured_bacterium_g__Candidatus_Saccharimonas	OTU251	0	14	7	10	1	0	0	0	0	0	0	0	0	0	0	0	0	0	0	0	0	0	0	0	0	0	0	0	0	0	0	0	0	0	0	0	0	0	32
d__Bacteria	k__norank	p__Chlamydiae	c__Chlamydiae	o__Chlamydiales	f__Parachlamydiaceae	g__Neochlamydia	s__uncultured_bacterium_g__Neochlamydia	OTU1604	0	0	0	0	0	0	0	0	0	0	0	0	0	0	0	0	0	0	1	1	5	0	5	1	1	1	0	0	0	0	0	0	0	0	0	0	0	0	15
d__Bacteria	k__norank	p__unclassified_k__norank	c__unclassified_k__norank	o__unclassified_k__norank	f__unclassified_k__norank	g__unclassified_k__norank	s__unclassified_k__norank	OTU64	17	0	0	0	0	0	0	0	0	0	0	0	0	0	0	0	0	0	0	0	0	0	0	0	0	0	0	0	0	0	0	0	0	0	0	0	0	0	17
d__Bacteria	k__norank	p__Acidobacteria	c__Acidobacteria	o__Subgroup_7	f__norank_o__Subgroup_7	g__norank_o__Subgroup_7	s__unclassified_g__norank_o__Subgroup_7	OTU402	0	0	15	0	0	0	0	0	0	0	0	0	0	0	0	0	0	0	0	0	0	0	0	0	0	0	0	0	0	0	0	0	0	0	0	0	0	0	15
d__Bacteria	k__norank	p__Firmicutes	c__Erysipelotrichia	o__Erysipelotrichales	f__Erysipelotrichaceae	g__Erysipelotrichaceae_UCG-004	s__unclassified_g__Erysipelotrichaceae_UCG-004	OTU995	0	0	0	0	17	0	0	0	0	0	0	0	0	0	0	0	0	0	0	0	0	0	0	0	0	0	0	0	0	0	0	0	0	0	0	0	0	0	17
d__Bacteria	k__norank	p__Cyanobacteria	c__Cyanobacteria	o__norank_c__Cyanobacteria	f__norank_c__Cyanobacteria	g__norank_c__Cyanobacteria	s__unclassified_g__norank_c__Cyanobacteria	OTU1919	0	0	0	0	0	0	0	0	0	0	0	0	0	0	0	0	0	0	5	2	0	2	4	6	1	5	0	3	0	0	0	0	0	0	0	0	0	0	28
d__Bacteria	k__norank	p__Bacteroidetes	c__Bacteroidia	o__Bacteroidales	f__Bacteroidales_BS11_gut_group	g__norank_f__Bacteroidales_BS11_gut_group	s__unclassified_g__norank_f__Bacteroidales_BS11_gut_group	OTU1204	0	0	8	3	0	11	0	0	0	0	0	0	0	0	0	0	0	0	0	0	0	0	0	0	0	0	0	0	0	0	0	0	0	0	0	0	0	0	22
d__Bacteria	k__norank	p__Bacteroidetes	c__Flavobacteriia	o__Flavobacteriales	f__Flavobacteriaceae	g__Capnocytophaga	s__unclassified_g__Capnocytophaga	OTU1140	0	0	0	0	0	14	0	0	0	0	0	0	0	0	0	0	0	0	0	0	0	0	0	0	0	0	0	0	0	0	0	0	0	0	0	0	0	0	14
d__Bacteria	k__norank	p__Firmicutes	c__Bacilli	o__Bacillales	f__Staphylococcaceae	g__Staphylococcus	s__unclassified_g__Staphylococcus	OTU1266	2	3	58	4	27	6	17	1	0	3	4	1	0	2	0	0	0	0	0	1	2	0	4	0	0	0	0	0	1	1	0	0	16	0	0	0	0	0	153
d__Bacteria	k__norank	p__Firmicutes	c__Clostridia	o__Clostridiales	f__Heliobacteriaceae	g__Hydrogenispora	s__uncultured_bacterium_g__Hydrogenispora	OTU1524	0	0	0	0	0	0	0	1	0	0	0	0	0	0	0	0	0	0	5	4	0	0	1	2	1	0	0	0	0	0	0	0	0	0	0	0	0	0	14
d__Bacteria	k__norank	p__Cyanobacteria	c__Cyanobacteria	o__Gastranaerophilales	f__norank_o__Gastranaerophilales	g__norank_o__Gastranaerophilales	s__unclassified_g__norank_o__Gastranaerophilales	OTU1483	0	0	0	3	0	0	0	3	1	1	0	0	1	1	0	0	0	0	0	3	4	0	7	0	0	0	0	2	3	0	1	1	7	0	0	0	0	0	38
d__Bacteria	k__norank	p__Verrucomicrobia	c__Verrucomicrobiae	o__Verrucomicrobiales	f__Verrucomicrobiaceae	g__Brevifollis	s__Brevifollis_gellanilyticus	OTU540	0	0	27	0	0	0	0	0	0	0	0	0	0	0	0	0	0	0	0	0	0	0	0	0	0	0	0	0	0	0	0	0	0	0	0	0	0	0	27
d__Bacteria	k__norank	p__Planctomycetes	c__BD7-11	o__norank_c__BD7-11	f__norank_c__BD7-11	g__norank_c__BD7-11	s__uncultured_bacterium_g__norank_c__BD7-11	OTU1370	0	0	0	0	0	2	0	0	0	2	0	0	0	0	0	0	0	0	0	1	5	0	5	0	1	0	0	0	0	0	0	0	0	0	0	0	1	0	17
d__Bacteria	k__norank	p__Proteobacteria	c__Betaproteobacteria	o__Burkholderiales	f__Comamonadaceae	g__Comamonas	s__uncultured_soil_bacterium_g__Comamonas	OTU1761	28	3	0	0	3	0	0	2	1	1	0	0	0	0	0	0	0	0	134	108	36	114	51	39	17	14	25	53	0	1	0	0	0	0	0	0	1	0	631
d__Bacteria	k__norank	p__Firmicutes	c__Clostridia	o__Clostridiales	f__Lachnospiraceae	g__Lachnospiraceae_NK4A136_group	s__unclassified_g__Lachnospiraceae_NK4A136_group	OTU997	0	0	12	0	29	0	0	0	0	0	0	0	0	0	0	0	0	0	0	0	0	0	0	0	0	0	0	0	0	0	0	0	0	0	0	0	0	0	41
d__Bacteria	k__norank	p__Actinobacteria	c__Actinobacteria	o__Propionibacteriales	f__Propionibacteriaceae	g__Propioniciclava	s__uncultured_bacterium_g__Propioniciclava	OTU1411	0	0	0	0	0	0	0	0	0	3	2	0	0	33	1	0	0	0	0	0	0	0	0	0	0	0	0	0	0	0	0	0	0	0	0	0	0	0	39
d__Bacteria	k__norank	p__Planctomycetes	c__OM190	o__norank_c__OM190	f__norank_c__OM190	g__norank_c__OM190	s__planctomycete_A-2	OTU1450	0	0	0	0	0	0	0	0	0	0	0	0	0	0	0	0	0	0	3	2	1	0	1	1	0	0	0	2	0	0	0	0	0	0	0	0	0	0	10
d__Bacteria	k__norank	p__Proteobacteria	c__Gammaproteobacteria	o__Enterobacteriales	f__Enterobacteriaceae	g__Raoultella	s__unclassified_g__Raoultella	OTU1267	13	36	15	8	46	9	73	3	0	5	0	0	0	0	0	0	0	0	0	0	2	0	3	0	0	0	0	0	0	0	0	1	0	0	0	0	1	0	215
d__Bacteria	k__norank	p__Actinobacteria	c__Actinobacteria	o__Bifidobacteriales	f__Bifidobacteriaceae	g__Bifidobacterium	s__Bifidobacterium_longum_subsp._infantis_ATCC_15697__JCM_1222__DSM_20088	OTU915	0	0	14	0	47	0	0	0	0	0	0	0	2	1	0	0	0	0	0	0	0	0	0	0	0	0	0	0	0	0	0	0	0	0	0	0	0	0	64
d__Bacteria	k__norank	p__Firmicutes	c__Clostridia	o__Clostridiales	f__Christensenellaceae	g__norank_f__Christensenellaceae	s__uncultured_rumen_bacterium_g__norank_f__Christensenellaceae	OTU1072	0	0	0	0	17	0	0	0	0	0	0	0	0	0	0	0	0	0	0	0	0	0	0	0	0	0	0	0	0	0	0	0	0	0	0	0	0	0	17
d__Bacteria	k__norank	p__Bacteroidetes	c__Bacteroidia	o__Bacteroidales	f__Bacteroidales_S24-7_group	g__norank_f__Bacteroidales_S24-7_group	s__uncultured_bacterium_g__norank_f__Bacteroidales_S24-7_group	OTU1200	0	0	0	0	0	8	0	0	0	0	0	0	0	0	0	0	0	0	0	0	0	0	0	0	0	0	0	0	0	0	0	0	0	0	0	0	0	0	8
d__Bacteria	k__norank	p__Firmicutes	c__Erysipelotrichia	o__Erysipelotrichales	f__Erysipelotrichaceae	g__Turicibacter	s__uncultured_bacterium_g__Turicibacter	OTU561	3	1	16	0	17	1	0	0	0	0	0	0	2	0	1	0	4	0	0	0	0	0	0	0	0	0	0	0	0	0	0	0	0	0	0	0	0	0	45
d__Bacteria	k__norank	p__Bacteroidetes	c__Bacteroidia	o__Bacteroidales	f__Bacteroidaceae	g__Bacteroides	s__unclassified_g__Bacteroides	OTU1162	0	0	0	0	0	110	0	0	0	0	0	0	0	0	0	0	0	0	0	0	0	0	0	0	0	0	0	0	0	0	0	0	0	0	0	0	0	0	110
d__Bacteria	k__norank	p__Bacteroidetes	c__Bacteroidia	o__Bacteroidales	f__Bacteroidales_BS11_gut_group	g__norank_f__Bacteroidales_BS11_gut_group	s__uncultured_rumen_bacterium_g__norank_f__Bacteroidales_BS11_gut_group	OTU560	0	11	41	0	70	7	0	0	0	0	0	0	0	0	0	0	0	0	0	0	0	0	0	0	0	0	0	0	0	0	0	0	0	0	0	0	0	0	129
d__Bacteria	k__norank	p__Firmicutes	c__Clostridia	o__Clostridiales	f__Ruminococcaceae	g__[Eubacterium]_coprostanoligenes_group	s__unclassified_g__[Eubacterium]_coprostanoligenes_group	OTU208	12	18	4	0	0	0	0	0	0	0	0	0	0	0	0	0	0	0	0	0	0	0	0	0	0	0	0	0	0	0	0	0	0	0	0	0	0	0	34
d__Bacteria	k__norank	p__Bacteroidetes	c__Bacteroidia	o__Bacteroidales	f__Bacteroidales_S24-7_group	g__norank_f__Bacteroidales_S24-7_group	s__unclassified_g__norank_f__Bacteroidales_S24-7_group	OTU879	0	0	0	0	59	0	0	0	0	0	0	0	0	0	0	0	0	0	0	0	1	0	0	0	0	0	0	0	0	0	0	0	0	0	0	0	0	0	60
d__Bacteria	k__norank	p__Acidobacteria	c__Acidobacteria	o__Solibacterales	f__Solibacteraceae__Subgroup_3_	g__Bryobacter	s__unclassified_g__Bryobacter	OTU748	0	0	0	11	0	0	0	0	0	0	0	0	0	0	0	0	0	0	0	0	0	0	0	0	0	0	0	0	0	0	0	0	0	0	0	0	0	0	11
d__Bacteria	k__norank	p__Chloroflexi	c__Anaerolineae	o__Anaerolineales	f__Anaerolineaceae	g__norank_f__Anaerolineaceae	s__uncultured_rumen_bacterium_g__norank_f__Anaerolineaceae	OTU340	0	0	23	0	11	38	0	0	0	0	0	0	0	0	0	0	0	0	0	0	0	0	0	0	0	0	0	0	0	0	0	0	0	0	0	0	0	0	72
d__Bacteria	k__norank	p__Firmicutes	c__Clostridia	o__Clostridiales	f__Christensenellaceae	g__Christensenellaceae_R-7_group	s__uncultured_bacterium_g__Christensenellaceae_R-7_group	OTU1080	0	0	0	5	0	5	1	0	0	0	0	0	0	0	0	0	0	0	0	0	0	0	0	0	0	0	0	0	0	0	0	0	0	0	0	0	0	0	11
d__Bacteria	k__norank	p__Bacteroidetes	c__Bacteroidia	o__Bacteroidales	f__Bacteroidaceae	g__Bacteroides	s__unclassified_g__Bacteroides	OTU682	1	0	19	10	1	0	0	1	0	0	0	0	0	0	0	0	0	0	0	0	0	0	0	0	0	0	0	0	0	0	0	0	0	0	0	0	0	0	32
d__Bacteria	k__norank	p__Deinococcus-Thermus	c__Deinococci	o__Deinococcales	f__Deinococcaceae	g__Deinococcus	s__uncultured_bacterium_g__Deinococcus	OTU1270	0	0	0	2	0	0	5	1	0	0	0	0	0	0	0	0	0	0	0	0	0	0	0	0	0	0	0	0	0	0	0	0	0	0	0	0	0	0	8
d__Bacteria	k__norank	p__Chlamydiae	c__Chlamydiae	o__Chlamydiales	f__Parachlamydiaceae	g__unclassified_f__Parachlamydiaceae	s__unclassified_f__Parachlamydiaceae	OTU1511	0	0	0	0	0	0	0	0	0	0	0	0	0	0	0	0	0	0	3	3	2	1	4	0	1	1	0	0	0	0	0	0	0	0	0	0	0	0	15
d__Bacteria	k__norank	p__BRC1	c__norank_p__BRC1	o__norank_p__BRC1	f__norank_p__BRC1	g__norank_p__BRC1	s__uncultured_bacterium_g__norank_p__BRC1	OTU1496	0	0	0	0	0	0	0	0	0	0	0	0	0	0	0	0	0	0	7	12	8	2	2	2	1	0	0	0	0	0	0	0	0	0	0	0	0	0	34
d__Bacteria	k__norank	p__Actinobacteria	c__Actinobacteria	o__Acidimicrobiales	f__Acidimicrobiaceae	g__Ilumatobacter	s__unclassified_g__Ilumatobacter	OTU110	23	2	0	0	0	0	0	0	0	0	0	0	0	0	0	0	0	0	0	0	0	0	0	0	0	0	0	0	0	0	0	0	0	0	0	0	0	0	25
d__Bacteria	k__norank	p__Chloroflexi	c__Anaerolineae	o__Anaerolineales	f__Anaerolineaceae	g__norank_f__Anaerolineaceae	s__unclassified_g__norank_f__Anaerolineaceae	OTU1814	0	0	0	0	0	0	0	0	0	0	0	0	0	0	0	0	0	0	2	0	8	0	1	1	0	1	0	1	0	0	0	0	0	0	0	0	0	0	14
d__Bacteria	k__norank	p__Proteobacteria	c__Betaproteobacteria	o__Burkholderiales	f__Burkholderiaceae	g__Burkholderia-Paraburkholderia	s__unclassified_g__Burkholderia-Paraburkholderia	OTU1378	0	4	0	0	1	0	0	0	0	0	1	0	0	0	0	0	0	0	0	0	1	0	2	0	0	0	0	0	0	1	0	0	0	0	0	0	1	0	11
d__Bacteria	k__norank	p__Bacteroidetes	c__Cytophagia	o__Cytophagales	f__Cytophagaceae	g__Dyadobacter	s__Dyadobacter_fermentans	OTU293	0	0	8	0	0	0	0	0	0	0	0	0	0	0	0	0	0	0	0	0	0	0	0	0	0	0	0	0	0	0	0	0	0	0	0	0	0	0	8
d__Bacteria	k__norank	p__Chloroflexi	c__Thermomicrobia	o__JG30-KF-CM45	f__norank_o__JG30-KF-CM45	g__norank_o__JG30-KF-CM45	s__unclassified_g__norank_o__JG30-KF-CM45	OTU1426	0	0	0	0	0	0	0	3	1	0	0	0	1	2	0	0	0	0	13	9	5	5	4	5	1	2	1	2	1	0	0	0	4	0	0	0	0	0	59
d__Bacteria	k__norank	p__Tenericutes	c__Mollicutes	o__Mollicutes_RF9	f__norank_o__Mollicutes_RF9	g__norank_o__Mollicutes_RF9	s__Acholeplasmatales_bacterium_canine_oral_taxon_316	OTU816	0	0	0	0	11	0	0	0	0	0	0	0	0	0	0	0	0	0	0	0	0	0	0	0	0	0	0	0	0	0	0	0	0	0	0	0	0	0	11
d__Bacteria	k__norank	p__Chlamydiae	c__Chlamydiae	o__Chlamydiales	f__Parachlamydiaceae	g__unclassified_f__Parachlamydiaceae	s__unclassified_f__Parachlamydiaceae	OTU1551	0	0	0	0	0	0	0	0	0	0	0	0	0	0	0	0	0	0	6	13	5	0	5	2	1	2	0	1	0	0	0	0	0	0	0	0	0	0	35
d__Bacteria	k__norank	p__Verrucomicrobia	c__Verrucomicrobiae	o__Verrucomicrobiales	f__DEV007	g__norank_f__DEV007	s__uncultured_Verrucomicrobiales_bacterium_g__norank_f__DEV007	OTU1467	0	0	0	0	0	1	0	0	0	0	0	0	0	1	0	0	0	0	42	11	4	1	1	8	0	0	0	2	4	1	0	0	6	0	0	0	0	0	82
d__Bacteria	k__norank	p__Firmicutes	c__Negativicutes	o__Selenomonadales	f__Acidaminococcaceae	g__Succiniclasticum	s__uncultured_rumen_bacterium_g__Succiniclasticum	OTU1161	0	0	6	0	1	31	0	0	0	0	0	0	0	0	0	0	0	0	0	0	0	0	0	0	0	0	0	0	0	0	0	0	0	0	0	0	0	0	38
d__Bacteria	k__norank	p__Proteobacteria	c__Gammaproteobacteria	o__Legionellales	f__Legionellaceae	g__Legionella	s__unclassified_g__Legionella	OTU1666	0	0	0	0	0	0	0	0	0	0	0	0	0	0	0	0	0	0	0	0	3	0	1	0	0	0	0	0	0	0	0	0	0	0	0	0	0	0	4
d__Bacteria	k__norank	p__Firmicutes	c__Clostridia	o__Clostridiales	f__Lachnospiraceae	g__Lachnospiraceae_UCG-006	s__uncultured_bacterium_g__Lachnospiraceae_UCG-006	OTU491	0	0	25	0	0	2	0	0	0	0	0	0	0	1	0	0	0	0	0	0	0	0	0	0	0	0	0	0	0	0	0	0	0	0	0	0	0	0	28
d__Bacteria	k__norank	p__Acidobacteria	c__Acidobacteria	o__Subgroup_7	f__norank_o__Subgroup_7	g__norank_o__Subgroup_7	s__uncultured_microorganism_g__norank_o__Subgroup_7	OTU125	19	0	0	0	0	0	0	0	0	0	0	0	0	0	0	0	0	0	0	0	0	0	0	0	0	0	0	0	0	0	0	0	0	0	0	0	0	0	19
d__Bacteria	k__norank	p__Bacteroidetes	c__Flavobacteriia	o__Flavobacteriales	f__Flavobacteriaceae	g__Soonwooa	s__Soonwooa_buanensis	OTU79	5811	4515	1020	744	96	1108	13	12	0	282	1347	0	0	0	0	0	0	0	0	0	0	0	0	0	0	0	0	0	0	0	0	0	0	0	0	0	0	0	14948
d__Bacteria	k__norank	p__Cyanobacteria	c__Cyanobacteria	o__norank_c__Cyanobacteria	f__norank_c__Cyanobacteria	g__norank_c__Cyanobacteria	s__unclassified_g__norank_c__Cyanobacteria	OTU2105	0	0	0	0	0	0	0	0	0	0	0	0	0	0	0	0	0	0	0	0	0	0	0	0	0	0	0	0	1	0	0	1	4	0	0	0	0	0	6
d__Bacteria	k__norank	p__Cyanobacteria	c__Cyanobacteria	o__norank_c__Cyanobacteria	f__norank_c__Cyanobacteria	g__norank_c__Cyanobacteria	s__unclassified_g__norank_c__Cyanobacteria	OTU1475	0	0	0	0	0	0	0	0	0	0	0	0	0	0	0	0	0	0	11	2	5	1	0	2	0	2	0	5	0	0	0	0	0	0	0	0	0	0	28
d__Bacteria	k__norank	p__Actinobacteria	c__Actinobacteria	o__Micrococcales	f__Micrococcaceae	g__Pseudarthrobacter	s__unclassified_g__Pseudarthrobacter	OTU1470	11	3	3	3	0	9	3	3	0	3	18	0	0	0	0	0	0	0	7	4	8	2	3	3	0	4	1	0	0	0	0	1	7	0	0	0	1	0	97
d__Bacteria	k__norank	p__Proteobacteria	c__Gammaproteobacteria	o__X35	f__norank_o__X35	g__norank_o__X35	s__uncultured_bacterium_g__norank_o__X35	OTU1875	0	0	0	0	0	0	0	0	0	0	0	0	0	0	0	0	0	0	0	1	1	0	1	0	1	1	0	0	0	0	0	0	0	0	0	0	0	0	5
d__Bacteria	k__norank	p__Bacteroidetes	c__Bacteroidia	o__Bacteroidales	f__Prevotellaceae	g__Prevotella_1	s__unclassified_g__Prevotella_1	OTU768	0	0	0	13	45	9	0	0	0	0	0	0	0	0	0	0	0	0	0	0	0	0	0	0	0	0	0	0	0	0	0	0	0	0	0	0	0	0	67
d__Bacteria	k__norank	p__Firmicutes	c__Erysipelotrichia	o__Erysipelotrichales	f__Erysipelotrichaceae	g__Turicibacter	s__unclassified_g__Turicibacter	OTU1472	0	0	0	0	0	0	0	0	0	0	2	0	0	0	0	0	0	0	18	13	17	17	5	3	1	7	3	6	0	0	0	0	0	0	0	0	10	9	111
d__Bacteria	k__norank	p__Actinobacteria	c__Actinobacteria	o__Gaiellales	f__norank_o__Gaiellales	g__norank_o__Gaiellales	s__uncultured_soil_bacterium_g__norank	OTU1692	0	0	0	0	0	0	0	0	0	0	0	0	0	0	0	0	0	0	10	9	14	0	4	1	3	1	1	1	0	0	0	0	0	0	0	0	0	0	44
d__Bacteria	k__norank	p__Actinobacteria	c__Actinobacteria	o__Streptomycetales	f__Streptomycetaceae	g__Streptomyces	s__unclassified_g__Streptomyces	OTU1081	0	0	0	0	0	6	1	4	0	0	0	0	0	0	0	0	0	0	3	2	4	3	1	2	0	1	0	1	1	0	0	1	3	0	0	0	0	0	33
d__Bacteria	k__norank	p__Chloroflexi	c__Caldilineae	o__Caldilineales	f__Caldilineaceae	g__norank_f__Caldilineaceae	s__unclassified_g__norank_f__Caldilineaceae	OTU2080	0	0	0	0	0	0	2	0	0	0	0	0	0	0	0	0	0	0	8	9	30	5	2	3	0	2	0	4	0	2	0	1	3	0	0	0	0	0	71
d__Bacteria	k__norank	p__Bacteroidetes	c__Bacteroidia	o__Bacteroidales	f__Bacteroidales_BS11_gut_group	g__norank_f__Bacteroidales_BS11_gut_group	s__unclassified_g__norank_f__Bacteroidales_BS11_gut_group	OTU577	0	0	8	6	27	2	0	0	0	0	0	0	0	0	0	0	0	0	0	0	0	0	0	0	0	0	0	0	0	0	0	0	0	0	0	0	0	0	43
d__Bacteria	k__norank	p__Firmicutes	c__Clostridia	o__Clostridiales	f__Ruminococcaceae	g__Ruminococcaceae_UCG-014	s__uncultured_bacterium_g__Ruminococcaceae_UCG-014	OTU663	0	0	5	30	0	2	0	0	0	0	0	0	0	0	0	0	0	0	0	0	0	0	0	0	0	0	0	0	0	0	0	0	0	0	0	0	0	0	37
d__Bacteria	k__norank	p__Firmicutes	c__Clostridia	o__Clostridiales	f__Peptostreptococcaceae	g__Proteocatella	s__uncultured_bacterium_g__Proteocatella	OTU2052	0	0	0	0	0	0	0	0	0	0	0	0	0	0	0	0	0	0	0	2	0	7	1	0	0	0	0	0	2	9	0	3	75	0	0	0	0	0	99
d__Bacteria	k__norank	p__Actinobacteria	c__Actinobacteria	o__Frankiales	f__Geodermatophilaceae	g__Blastococcus	s__unclassified_g__Blastococcus	OTU153	12	8	0	0	0	0	0	0	0	0	0	0	0	0	0	0	0	0	0	0	0	0	0	0	0	0	0	0	0	0	0	1	0	0	0	0	0	0	21
d__Bacteria	k__norank	p__TM6__Dependentiae_	c__norank_p__TM6__Dependentiae_	o__norank_p__TM6__Dependentiae_	f__norank_p__TM6__Dependentiae_	g__norank_p__TM6__Dependentiae_	s__uncultured_bacterium_g__norank_p__TM6__Dependentiae_	OTU1743	0	0	0	0	0	0	0	0	0	0	0	0	0	0	0	0	0	0	18	27	40	13	13	12	4	11	5	8	0	0	0	0	0	0	0	0	0	0	151
d__Bacteria	k__norank	p__Omnitrophica	c__norank_p__Omnitrophica	o__norank_p__Omnitrophica	f__norank_p__Omnitrophica	g__norank_p__Omnitrophica	s__unclassified_g__norank_p__Omnitrophica	OTU1502	0	0	0	0	0	0	0	0	0	0	0	0	0	0	0	0	0	0	3	3	1	1	2	2	1	2	0	0	0	0	0	0	0	0	0	0	0	0	15
d__Bacteria	k__norank	p__Bacteroidetes	c__Bacteroidia	o__Bacteroidales	f__Rikenellaceae	g__Rikenellaceae_RC9_gut_group	s__uncultured_bacterium_g__Rikenellaceae_RC9_gut_group	OTU535	0	0	8	3	0	2	0	0	0	0	0	0	0	0	0	0	0	0	0	0	0	0	0	0	0	0	0	0	0	0	0	0	0	0	0	0	0	0	13
d__Bacteria	k__norank	p__Proteobacteria	c__Gammaproteobacteria	o__Methylococcales	f__Crenotrichaceae	g__Crenothrix	s__uncultured_bacterium_g__Crenothrix	OTU1678	0	0	0	0	0	0	0	0	0	0	0	0	0	3	1	0	0	0	6	17	8	9	10	2	1	0	3	0	0	0	0	0	4	0	0	0	0	0	64
d__Bacteria	k__norank	p__Ignavibacteriae	c__Ignavibacteria	o__Ignavibacteriales	f__BSV40	g__norank_f__BSV40	s__unclassified_g__norank_f__BSV40	OTU35	32	0	4	0	0	0	0	0	0	0	0	0	0	0	0	0	0	0	0	0	0	0	0	0	0	0	0	0	0	0	0	0	0	0	0	0	0	0	36
d__Bacteria	k__norank	p__Bacteroidetes	c__Bacteroidia	o__Bacteroidales	f__Prevotellaceae	g__Alloprevotella	s__uncultured_bacterium_g__Alloprevotella	OTU572	0	0	19	0	0	0	0	0	0	0	0	0	0	0	0	0	0	0	0	0	0	0	0	0	0	0	0	0	0	0	0	0	0	0	0	0	0	0	19
d__Bacteria	k__norank	p__Firmicutes	c__Clostridia	o__Clostridiales	f__Family_XIII	g__[Eubacterium]_brachy_group	s__unclassified_g__[Eubacterium]_brachy_group	OTU1323	0	0	0	0	0	0	0	12	0	0	0	0	0	0	0	0	0	0	0	0	0	0	0	0	0	0	0	0	1	0	0	0	1	0	0	0	0	0	14
d__Bacteria	k__norank	p__Chloroflexi	c__Ardenticatenia	o__norank_c__Ardenticatenia	f__norank_c__Ardenticatenia	g__norank_c__Ardenticatenia	s__unclassified_g__norank_c__Ardenticatenia	OTU1561	0	0	0	0	0	0	0	0	0	0	0	0	0	0	0	0	0	0	7	6	48	3	7	1	0	1	0	1	0	0	0	0	0	0	0	0	0	0	74
d__Bacteria	k__norank	p__Actinobacteria	c__Actinobacteria	o__Coriobacteriales	f__Coriobacteriaceae	g__Olsenella	s__unclassified_g__Olsenella	OTU1010	0	0	0	0	5	2	0	0	0	0	0	0	0	0	0	0	0	0	0	0	0	0	0	0	0	0	0	0	0	0	0	0	0	0	0	0	0	0	7
d__Bacteria	k__norank	p__Tenericutes	c__Mollicutes	o__NB1-n	f__norank_o__NB1-n	g__norank_o__NB1-n	s__uncultured_bacterium_g__norank_o__NB1-n	OTU936	0	0	0	0	30	5	0	0	0	0	0	0	0	0	0	0	0	0	0	0	0	0	0	0	0	0	0	0	0	0	0	0	0	0	0	0	0	0	35
d__Bacteria	k__norank	p__Bacteroidetes	c__Sphingobacteriia	o__Sphingobacteriales	f__Sphingobacteriaceae	g__Sphingobacterium	s__Sphingobacterium_mizutaii	OTU715	18	53	5	30	0	3	0	8	0	16	10	0	0	4	0	0	0	0	0	0	0	0	0	0	0	0	0	0	0	0	0	0	0	0	0	0	0	0	147
d__Bacteria	k__norank	p__Chlamydiae	c__Chlamydiae	o__Chlamydiales	f__unclassified_o__Chlamydiales	g__unclassified_o__Chlamydiales	s__unclassified_o__Chlamydiales	OTU1635	0	0	0	0	0	0	0	0	0	0	0	0	0	0	0	0	0	0	2	0	1	0	0	0	0	1	0	0	0	0	0	0	0	0	0	0	0	0	4
d__Bacteria	k__norank	p__Proteobacteria	c__Gammaproteobacteria	o__Chromatiales	f__Chromatiaceae	g__Thiocapsa	s__Thiocapsa_roseopersicina	OTU2064	21	2	8	7	6	19	327	1140	0	0	0	0	0	0	0	0	0	0	0	0	0	0	0	0	0	0	0	0	25	30	0	3	210	0	0	0	0	0	1798
d__Bacteria	k__norank	p__Chloroflexi	c__Caldilineae	o__Caldilineales	f__Caldilineaceae	g__norank_f__Caldilineaceae	s__unclassified_g__norank_f__Caldilineaceae	OTU1477	0	0	0	0	0	0	7	11	0	0	0	0	0	0	0	0	0	0	8	8	3	6	5	2	0	0	1	2	10	12	1	3	37	0	0	0	0	0	116
d__Bacteria	k__norank	p__Firmicutes	c__Clostridia	o__Clostridiales	f__Christensenellaceae	g__Christensenellaceae_R-7_group	s__uncultured_bacterium_g__Christensenellaceae_R-7_group	OTU766	0	0	0	10	13	0	0	0	0	0	0	0	0	0	0	0	0	0	0	0	0	0	0	0	0	0	0	0	0	0	0	0	0	0	0	0	0	0	23
d__Bacteria	k__norank	p__Lentisphaerae	c__Oligosphaeria	o__Oligosphaerales	f__Oligosphaeraceae	g__horsej-a03	s__unclassified_g__horsej-a03	OTU760	0	0	0	0	35	0	0	0	0	0	0	0	0	0	0	0	0	0	0	0	0	0	0	0	0	0	0	0	0	0	0	0	0	0	0	0	0	0	35
d__Bacteria	k__norank	p__Chloroflexi	c__Anaerolineae	o__Anaerolineales	f__Anaerolineaceae	g__norank_f__Anaerolineaceae	s__unclassified_g__norank_f__Anaerolineaceae	OTU1671	0	0	0	0	0	0	0	0	0	0	0	0	0	0	0	0	0	0	0	1	29	0	3	0	0	0	0	0	0	1	0	0	0	0	0	0	0	0	34
d__Bacteria	k__norank	p__Proteobacteria	c__Gammaproteobacteria	o__unclassified_c__Gammaproteobacteria	f__unclassified_c__Gammaproteobacteria	g__unclassified_c__Gammaproteobacteria	s__unclassified_c__Gammaproteobacteria	OTU2129	0	0	0	0	0	0	0	0	0	0	0	0	0	0	0	0	0	0	0	0	0	0	0	0	0	0	0	0	0	0	0	0	20	0	0	0	0	0	20
d__Bacteria	k__norank	p__Proteobacteria	c__Gammaproteobacteria	o__Pasteurellales	f__Pasteurellaceae	g__norank_f__Pasteurellaceae	s__uncultured_bacterium_g__norank_f__Pasteurellaceae	OTU1738	0	0	0	0	0	0	0	0	0	0	0	0	0	0	0	0	0	0	0	5	2	17	6	0	0	0	0	0	0	0	0	0	0	0	0	0	0	0	30
d__Bacteria	k__norank	p__Chloroflexi	c__Caldilineae	o__Caldilineales	f__Caldilineaceae	g__norank_f__Caldilineaceae	s__unclassified_g__norank_f__Caldilineaceae	OTU1478	0	0	0	0	0	0	0	0	0	0	0	0	0	0	0	0	0	0	1	3	5	1	0	0	0	0	0	0	0	1	0	0	2	0	0	0	0	0	13
d__Bacteria	k__norank	p__Cyanobacteria	c__Cyanobacteria	o__SubsectionIII	f__FamilyI_o__SubsectionIII	g__unclassified_f__FamilyI_o__SubsectionIII	s__unclassified_f__FamilyI_o__SubsectionIII	OTU213	31	35	3	6	0	0	0	0	0	0	0	0	0	0	0	0	0	0	0	0	0	0	0	0	0	0	0	0	4	14	0	1	5	0	0	0	0	0	99
d__Bacteria	k__norank	p__Proteobacteria	c__Deltaproteobacteria	o__Myxococcales	f__unclassified_o__Myxococcales	g__unclassified_o__Myxococcales	s__unclassified_o__Myxococcales	OTU1920	0	0	0	0	0	0	0	0	0	0	0	0	0	0	0	0	0	0	2	2	0	1	1	0	0	2	0	0	0	0	0	0	0	0	0	0	0	0	8
d__Bacteria	k__norank	p__Proteobacteria	c__Gammaproteobacteria	o__Xanthomonadales	f__Xanthomonadales_Incertae_Sedis	g__Candidatus_Competibacter	s__uncultured_bacterium_g__Candidatus_Competibacter	OTU2092	0	0	0	0	1	0	4	13	0	0	0	0	0	1	0	0	0	0	0	0	0	0	0	0	0	0	0	0	4	2	0	0	16	0	0	0	0	0	41
d__Bacteria	k__norank	p__Chloroflexi	c__Anaerolineae	o__Anaerolineales	f__Anaerolineaceae	g__norank_f__Anaerolineaceae	s__uncultured_prokaryote_g__norank_f__Anaerolineaceae	OTU46	18	0	0	0	0	0	0	0	0	0	0	0	0	0	0	0	0	0	0	0	0	0	0	0	0	0	0	0	0	0	0	0	0	0	0	0	0	0	18
d__Bacteria	k__norank	p__Fibrobacteres	c__Fibrobacteria	o__Fibrobacterales	f__Fibrobacteraceae	g__Fibrobacter	s__unclassified_g__Fibrobacter	OTU1005	0	0	0	0	22	0	0	0	0	0	0	0	0	0	0	0	0	0	0	0	0	0	0	0	0	0	0	0	0	0	0	0	0	0	0	0	0	0	22
d__Bacteria	k__norank	p__Firmicutes	c__Erysipelotrichia	o__Erysipelotrichales	f__Erysipelotrichaceae	g__unclassified_f__Erysipelotrichaceae	s__unclassified_f__Erysipelotrichaceae	OTU741	0	0	0	19	8	20	0	0	0	0	0	0	0	0	0	0	0	0	0	0	0	0	0	0	0	0	0	0	0	0	0	0	0	0	0	0	0	0	47
d__Bacteria	k__norank	p__Bacteroidetes	c__Bacteroidia	o__Bacteroidales	f__Prevotellaceae	g__Prevotella_1	s__unclassified_g__Prevotella_1	OTU1156	0	20	8	13	28	15	0	0	0	0	0	0	0	0	0	0	0	0	0	0	0	0	0	0	0	0	0	0	0	0	0	0	0	0	0	0	0	0	84
d__Bacteria	k__norank	p__Firmicutes	c__Clostridia	o__Clostridiales	f__Ruminococcaceae	g__Ruminococcaceae_UCG-014	s__unidentified_rumen_bacterium_RF6	OTU1050	0	0	0	0	9	0	0	0	0	0	0	0	0	0	0	0	0	0	0	0	0	0	0	0	0	0	0	0	0	0	0	0	0	0	0	0	0	0	9
d__Bacteria	k__norank	p__Planctomycetes	c__Planctomycetacia	o__Planctomycetales	f__Planctomycetaceae	g__Singulisphaera	s__unclassified_g__Singulisphaera	OTU619	0	0	5	0	0	0	0	0	0	0	0	0	0	0	0	0	0	0	0	0	0	0	0	0	0	0	0	0	0	0	0	0	0	0	0	0	0	0	5
d__Bacteria	k__norank	p__Bacteroidetes	c__Bacteroidia	o__Bacteroidales	f__Prevotellaceae	g__Prevotella_1	s__unclassified_g__Prevotella_1	OTU1029	0	0	10	0	11	18	0	0	0	0	0	0	0	0	0	0	0	0	0	0	0	0	0	0	0	0	0	0	0	0	0	0	0	0	0	0	0	0	39
d__Bacteria	k__norank	p__Actinobacteria	c__Actinobacteria	o__Corynebacteriales	f__Corynebacteriaceae	g__Corynebacterium_1	s__Corynebacterium_simulans	OTU371	0	0	19	0	0	0	1	0	0	2	0	0	0	0	0	0	0	0	0	0	0	0	0	0	0	0	0	0	0	0	0	0	2	0	0	0	0	0	24
d__Bacteria	k__norank	p__Proteobacteria	c__Deltaproteobacteria	o__Oligoflexales	f__0319-6G20	g__norank_f__0319-6G20	s__uncultured_rumen_bacterium_g__norank_f__0319-6G20	OTU867	0	0	0	16	13	20	0	0	0	0	0	0	0	0	0	0	0	0	0	0	0	0	0	0	0	0	0	0	0	0	0	0	0	0	0	0	0	0	49
d__Bacteria	k__norank	p__Firmicutes	c__Clostridia	o__Clostridiales	f__Clostridiaceae_1	g__Clostridium_sensu_stricto_1	s__uncultured_bacterium_g__Clostridium_sensu_stricto_1	OTU2009	89	70	99	31	30	74	105	320	3	29	31	0	1	9	0	0	0	0	1	7	31	1	25	3	0	0	1	7	244	561	27	134	3080	0	0	0	2	0	5015
d__Bacteria	k__norank	p__Bacteroidetes	c__Bacteroidia	o__Bacteroidales	f__Bacteroidales_S24-7_group	g__norank_f__Bacteroidales_S24-7_group	s__uncultured_bacterium_g__norank_f__Bacteroidales_S24-7_group	OTU544	0	0	15	0	0	0	0	0	0	0	0	0	0	0	0	0	0	0	0	0	0	0	0	0	0	0	0	0	0	0	0	0	0	0	0	0	0	0	15
d__Bacteria	k__norank	p__Spirochaetae	c__Spirochaetes	o__Spirochaetales	f__Spirochaetaceae	g__Treponema_2	s__unclassified_g__Treponema_2	OTU624	0	0	26	0	61	11	0	0	0	0	0	0	0	0	0	0	0	0	0	0	0	0	0	0	0	0	0	0	0	0	0	0	0	0	0	0	0	0	98
d__Bacteria	k__norank	p__Proteobacteria	c__Betaproteobacteria	o__SC-I-84	f__norank_o__SC-I-84	g__norank_o__SC-I-84	s__unclassified_g__norank_o__SC-I-84	OTU1723	1	0	0	0	0	0	0	0	0	0	0	0	0	0	0	0	0	0	98	97	50	63	33	40	11	23	24	29	0	0	0	0	1	0	0	0	0	0	470
d__Bacteria	k__norank	p__Proteobacteria	c__Gammaproteobacteria	o__Legionellales	f__Coxiellaceae	g__Aquicella	s__unclassified_g__Aquicella	OTU1881	0	0	0	0	0	0	0	0	0	0	0	0	0	0	0	0	0	0	4	3	0	0	0	0	1	1	0	1	0	0	0	0	0	0	0	0	0	0	10
d__Bacteria	k__norank	p__Proteobacteria	c__Deltaproteobacteria	o__Syntrophobacterales	f__Syntrophaceae	g__Desulfobacca	s__uncultured_delta_proteobacterium_g__Desulfobacca	OTU1733	0	0	0	0	0	0	0	0	0	0	0	0	0	0	0	0	0	0	1	1	4	5	1	3	0	1	0	0	0	0	0	0	2	0	0	0	0	0	18
d__Bacteria	k__norank	p__Chloroflexi	c__Thermomicrobia	o__JG30-KF-CM45	f__norank_o__JG30-KF-CM45	g__norank_o__JG30-KF-CM45	s__uncultured_bacterium_g__norank_o__JG30-KF-CM45	OTU1452	0	0	0	0	0	0	0	0	0	0	0	0	0	0	0	0	0	0	4	10	6	3	2	2	0	7	0	2	0	0	0	0	0	0	0	0	0	0	36
d__Bacteria	k__norank	p__unclassified_k__norank	c__unclassified_k__norank	o__unclassified_k__norank	f__unclassified_k__norank	g__unclassified_k__norank	s__unclassified_k__norank	OTU1229	0	0	0	0	0	5	0	0	0	0	0	0	0	0	0	0	0	0	0	0	0	0	0	0	0	0	0	0	0	0	0	0	0	0	0	0	0	0	5
d__Bacteria	k__norank	p__Bacteroidetes	c__Bacteroidia	o__Bacteroidales	f__Rikenellaceae	g__Rikenellaceae_RC9_gut_group	s__unclassified_g__Rikenellaceae_RC9_gut_group	OTU691	0	19	90	83	168	40	0	0	0	0	0	0	0	0	0	0	0	0	0	0	0	0	0	0	0	0	0	0	0	0	0	0	0	0	0	0	0	0	400
d__Bacteria	k__norank	p__Proteobacteria	c__Alphaproteobacteria	o__Rhodospirillales	f__Rhodospirillaceae	g__norank_f__Rhodospirillaceae	s__unidentified_rumen_bacterium_RFN49	OTU763	0	0	0	0	24	0	0	0	0	0	0	0	0	0	0	0	0	0	0	0	0	0	0	0	0	0	0	0	0	0	0	0	0	0	0	0	0	0	24
d__Bacteria	k__norank	p__Saccharibacteria	c__norank_p__Saccharibacteria	o__norank_p__Saccharibacteria	f__norank_p__Saccharibacteria	g__norank_p__Saccharibacteria	s__unclassified_g__norank_p__Saccharibacteria	OTU1312	0	0	0	0	0	0	0	4	0	0	0	0	0	0	0	0	0	0	0	1	0	0	0	0	0	0	0	0	0	0	0	0	5	0	0	0	0	0	10
d__Bacteria	k__norank	p__Actinobacteria	c__Actinobacteria	o__Acidimicrobiales	f__norank_o__Acidimicrobiales	g__norank_o__Acidimicrobiales	s__unclassified_g__norank_o__Acidimicrobiales	OTU457	0	0	21	1	0	0	0	0	0	0	0	0	0	0	0	0	0	0	0	0	0	0	0	0	0	0	0	0	0	0	0	0	0	0	0	0	0	0	22
d__Bacteria	k__norank	p__Saccharibacteria	c__norank_p__Saccharibacteria	o__norank_p__Saccharibacteria	f__norank_p__Saccharibacteria	g__norank_p__Saccharibacteria	s__uncultured_soil_bacterium_g__norank_p__Saccharibacteria	OTU1928	0	0	0	0	0	0	0	0	0	0	0	0	0	0	0	0	0	0	0	3	3	7	0	1	1	3	1	3	0	0	0	0	0	0	0	0	0	0	22
d__Bacteria	k__norank	p__Cyanobacteria	c__Cyanobacteria	o__norank_c__Cyanobacteria	f__norank_c__Cyanobacteria	g__norank_c__Cyanobacteria	s__unclassified_g__norank_c__Cyanobacteria	OTU1876	0	0	0	0	0	0	0	0	0	0	0	0	0	0	0	0	0	0	13	26	7	5	8	2	2	2	0	0	0	1	0	0	0	0	0	0	0	0	66
d__Bacteria	k__norank	p__Actinobacteria	c__Actinobacteria	o__Gaiellales	f__norank_o__Gaiellales	g__norank_o__Gaiellales	s__uncultured_prokaryote_g__norank	OTU1915	0	0	0	0	0	0	0	0	0	0	0	0	0	0	0	0	0	0	2	2	0	0	1	3	0	2	1	0	0	0	0	0	0	0	0	0	0	0	11
d__Bacteria	k__norank	p__Proteobacteria	c__Alphaproteobacteria	o__Rhodospirillales	f__Acetobacteraceae	g__norank_f__Acetobacteraceae	s__unclassified_g__norank_f__Acetobacteraceae	OTU141	15	0	0	0	0	0	0	1	0	0	0	0	0	0	0	0	0	0	3	0	0	3	0	0	1	0	1	2	0	0	0	0	0	0	0	0	0	0	26
d__Bacteria	k__norank	p__Firmicutes	c__Bacilli	o__Bacillales	f__Staphylococcaceae	g__Macrococcus	s__Macrococcus_brunensis	OTU578	0	0	15	0	0	0	0	0	0	0	0	0	0	0	0	0	0	0	0	0	0	0	0	0	0	0	0	0	0	0	0	0	0	0	0	0	0	0	15
d__Bacteria	k__norank	p__Firmicutes	c__Erysipelotrichia	o__Erysipelotrichales	f__Erysipelotrichaceae	g__Dielma	s__uncultured_bacterium_g__Dielma	OTU1821	0	0	0	0	0	0	0	0	0	0	0	0	0	0	0	0	0	0	3	7	23	5	7	5	2	1	3	3	0	0	0	0	0	0	0	0	0	0	59
d__Bacteria	k__norank	p__Actinobacteria	c__Actinobacteria	o__unclassified_c__Actinobacteria	f__unclassified_c__Actinobacteria	g__unclassified_c__Actinobacteria	s__unclassified_c__Actinobacteria	OTU1982	0	0	0	0	0	0	0	0	0	0	0	0	0	0	0	0	0	0	7	9	10	8	2	3	2	4	1	5	0	0	0	0	0	0	0	0	0	0	51
d__Bacteria	k__norank	p__Firmicutes	c__Clostridia	o__Halanaerobiales	f__ODP1230B8.23	g__norank_f__ODP1230B8.23	s__uncultured_rumen_bacterium_g__norank_f__ODP1230B8.23	OTU866	0	0	0	0	16	1	0	0	0	0	0	0	0	0	0	0	0	0	0	0	0	0	0	0	0	0	0	0	0	0	0	0	0	0	0	0	0	0	17
d__Bacteria	k__norank	p__Firmicutes	c__Clostridia	o__Clostridiales	f__Ruminococcaceae	g__Ruminococcaceae_NK4A214_group	s__unclassified_g__Ruminococcaceae_NK4A214_group	OTU411	0	0	8	0	0	0	0	0	0	0	0	0	0	0	0	0	0	0	0	0	0	0	0	0	0	0	0	0	0	0	0	0	0	0	0	0	0	0	8
d__Bacteria	k__norank	p__Proteobacteria	c__Alphaproteobacteria	o__Rhizobiales	f__Hyphomicrobiaceae	g__Hyphomicrobium	s__unclassified_g__Hyphomicrobium	OTU2138	0	0	0	0	0	0	0	0	0	0	0	0	0	0	0	0	0	0	0	0	0	0	0	0	0	0	0	0	0	0	0	0	2	0	0	0	0	0	2
d__Bacteria	k__norank	p__Cyanobacteria	c__Cyanobacteria	o__norank_c__Cyanobacteria	f__norank_c__Cyanobacteria	g__norank_c__Cyanobacteria	s__uncultured_Cyanobacterium_sp._g__norank_c__Cyanobacteria	OTU1908	0	0	0	0	0	0	0	0	0	0	0	0	0	1	0	0	0	0	100	86	69	38	8	51	8	28	2	28	0	1	0	0	5	0	0	0	0	0	425
d__Bacteria	k__norank	p__Firmicutes	c__Bacilli	o__Lactobacillales	f__Streptococcaceae	g__Streptococcus	s__unclassified_g__Streptococcus	OTU729	0	13	1	36	5	1	0	4	0	2	0	0	0	0	0	0	0	0	0	1	0	0	0	0	0	0	0	0	0	4	0	1	7	0	0	0	0	0	75
d__Bacteria	k__norank	p__Firmicutes	c__Clostridia	o__Clostridiales	f__Ruminococcaceae	g__Ruminococcaceae_UCG-005	s__uncultured_rumen_bacterium_g__Ruminococcaceae_UCG-005	OTU1009	0	5	0	0	26	0	0	0	0	0	0	0	0	0	0	0	0	0	0	0	0	0	0	0	0	0	0	0	0	0	0	0	0	0	0	0	0	0	31
d__Bacteria	k__norank	p__Proteobacteria	c__Alphaproteobacteria	o__Rhodobacterales	f__Rhodobacteraceae	g__Pannonibacter	s__Pannonibacter_phragmitetus	OTU2117	0	0	0	0	0	0	0	0	0	0	0	0	0	0	0	0	0	0	0	0	0	0	0	0	0	0	0	0	0	0	0	0	28	0	0	0	0	0	28
d__Bacteria	k__norank	p__Proteobacteria	c__Betaproteobacteria	o__SC-I-84	f__norank_o__SC-I-84	g__norank_o__SC-I-84	s__unclassified_g__norank_o__SC-I-84	OTU1952	1	0	0	0	0	0	0	0	0	0	0	0	0	0	0	0	0	0	117	131	88	78	44	35	23	16	19	21	1	0	0	0	1	0	0	0	0	0	575
d__Bacteria	k__norank	p__Cyanobacteria	c__Cyanobacteria	o__norank_c__Cyanobacteria	f__norank_c__Cyanobacteria	g__norank_c__Cyanobacteria	s__Coelastrella_sp._M60_g__norank	OTU1320	0	0	5	0	0	0	0	6	0	0	0	0	0	0	0	0	0	0	0	0	0	0	0	0	0	0	0	0	2	2	1	2	13	0	0	0	0	0	31
d__Bacteria	k__norank	p__Firmicutes	c__Clostridia	o__Clostridiales	f__Ruminococcaceae	g__Ruminococcus_1	s__human_gut_metagenome_g__Ruminococcus_1	OTU338	0	1	10	0	0	0	0	0	0	0	0	0	0	0	0	0	0	0	0	0	0	0	0	0	0	0	0	0	0	0	0	0	0	0	0	0	0	0	11
d__Bacteria	k__norank	p__Firmicutes	c__Clostridia	o__Clostridiales	f__Ruminococcaceae	g__Ruminococcaceae_UCG-010	s__uncultured_bacterium_g__Ruminococcaceae_UCG-010	OTU452	0	0	14	0	0	0	0	0	0	0	0	0	0	0	0	0	0	0	0	0	0	0	0	0	0	0	0	0	0	0	0	0	0	0	0	0	0	0	14
d__Bacteria	k__norank	p__Firmicutes	c__Clostridia	o__Clostridiales	f__Ruminococcaceae	g__[Eubacterium]_coprostanoligenes_group	s__gut_metagenome_g__[Eubacterium]_coprostanoligenes_group	OTU809	0	0	0	0	34	0	0	0	0	0	0	0	0	0	0	0	0	0	0	0	0	0	0	0	0	0	0	0	0	0	0	0	0	0	0	0	0	0	34
d__Bacteria	k__norank	p__Saccharibacteria	c__norank_p__Saccharibacteria	o__norank_p__Saccharibacteria	f__norank_p__Saccharibacteria	g__norank_p__Saccharibacteria	s__unclassified_g__norank_p__Saccharibacteria	OTU1771	0	0	0	0	0	0	0	0	0	0	0	0	0	0	0	0	0	0	1	3	3	1	9	0	0	0	0	1	0	0	0	0	0	0	0	0	0	0	18
d__Bacteria	k__norank	p__Proteobacteria	c__Deltaproteobacteria	o__Myxococcales	f__Nannocystaceae	g__Nannocystis	s__unclassified_g__Nannocystis	OTU2000	0	0	0	0	0	0	0	0	0	0	0	0	0	0	0	0	0	0	7	9	26	1	4	1	2	1	0	5	0	0	0	0	0	0	0	0	0	0	56
d__Bacteria	k__norank	p__Firmicutes	c__Clostridia	o__Clostridiales	f__Christensenellaceae	g__Christensenellaceae_R-7_group	s__uncultured_sludge_bacterium_g__Christensenellaceae_R-7_group	OTU195	0	22	39	8	31	8	0	0	0	0	0	0	0	0	0	0	0	0	0	0	0	0	0	0	0	0	0	0	0	0	0	0	0	0	0	0	0	0	108
d__Bacteria	k__norank	p__Chloroflexi	c__Ardenticatenia	o__norank_c__Ardenticatenia	f__norank_c__Ardenticatenia	g__norank_c__Ardenticatenia	s__uncultured_organism_g__norank_c__Ardenticatenia	OTU1595	0	0	0	0	0	0	0	0	0	0	0	0	0	0	0	0	0	0	0	1	6	0	0	0	0	0	0	0	0	0	0	0	0	0	0	0	0	0	7
d__Bacteria	k__norank	p__Proteobacteria	c__Deltaproteobacteria	o__Desulfuromonadales	f__Geobacteraceae	g__Geothermobacter	s__unclassified_g__Geothermobacter	OTU1734	0	0	0	0	0	0	0	0	0	0	0	0	0	0	0	0	0	0	0	4	0	8	9	0	1	0	2	0	0	0	0	0	0	0	0	0	0	0	24
d__Bacteria	k__norank	p__Actinobacteria	c__Actinobacteria	o__Acidimicrobiales	f__norank_o__Acidimicrobiales	g__norank_o__Acidimicrobiales	s__unclassified_g__norank_o__Acidimicrobiales	OTU320	0	0	39	0	0	0	0	0	0	0	0	0	0	0	0	0	0	0	0	0	0	0	0	0	0	0	0	0	0	0	0	0	0	0	0	0	0	0	39
d__Bacteria	k__norank	p__Bacteroidetes	c__Sphingobacteriia	o__Sphingobacteriales	f__Chitinophagaceae	g__Chitinophaga	s__uncultured_bacterium_g__Chitinophaga	OTU1839	0	0	0	0	0	0	0	0	0	0	0	0	0	0	0	0	0	0	0	2	0	7	2	0	2	0	0	0	0	0	0	0	0	0	0	0	0	0	13
d__Bacteria	k__norank	p__TM6__Dependentiae_	c__norank_p__TM6__Dependentiae_	o__norank_p__TM6__Dependentiae_	f__norank_p__TM6__Dependentiae_	g__norank_p__TM6__Dependentiae_	s__candidate_division_TM6_bacterium_GW2011_GWF2_30_66	OTU1687	0	0	0	0	0	0	0	0	0	0	0	0	0	0	0	0	0	0	2	2	6	2	3	0	0	1	0	0	0	0	0	0	0	0	0	0	0	0	16
d__Bacteria	k__norank	p__Actinobacteria	c__Actinobacteria	o__Corynebacteriales	f__Dietziaceae	g__Dietzia	s__uncultured_bacterium_g__Dietzia	OTU2133	0	0	5	0	0	4	2	2	1	0	0	0	0	0	0	0	0	0	0	0	0	0	0	0	0	0	0	0	1	6	1	3	46	0	0	0	0	0	71
d__Bacteria	k__norank	p__Firmicutes	c__Clostridia	o__Clostridiales	f__Family_XIII	g__[Eubacterium]_nodatum_group	s__unclassified_g__[Eubacterium]_nodatum_group	OTU317	0	0	14	0	0	2	0	0	0	0	0	0	0	0	0	0	0	0	0	0	0	0	0	0	0	0	0	0	0	0	0	0	0	0	0	0	0	0	16
d__Bacteria	k__norank	p__Acidobacteria	c__Acidobacteria	o__Blastocatellales	f__Blastocatellaceae__Subgroup_4_	g__RB41	s__uncultured_bacterium_148	OTU522	0	0	14	0	0	0	0	0	0	0	0	0	0	0	0	0	0	0	0	0	0	0	0	0	0	0	0	0	0	0	0	0	0	0	0	0	0	0	14
d__Bacteria	k__norank	p__SR1__Absconditabacteria_	c__norank_p__SR1__Absconditabacteria_	o__norank_p__SR1__Absconditabacteria_	f__norank_p__SR1__Absconditabacteria_	g__norank_p__SR1__Absconditabacteria_	s__uncultured_rumen_bacterium_g__norank_p__SR1__Absconditabacteria_	OTU842	0	13	5	0	79	45	0	0	0	0	0	0	0	0	0	0	0	0	0	0	0	0	0	0	0	0	0	0	0	0	0	0	0	0	0	0	0	0	142
d__Bacteria	k__norank	p__Saccharibacteria	c__norank_p__Saccharibacteria	o__norank_p__Saccharibacteria	f__norank_p__Saccharibacteria	g__norank_p__Saccharibacteria	s__uncultured_Candidatus_Saccharibacteria_bacterium_g__norank_p__Saccharibacteria	OTU600	0	26	7	0	0	0	0	0	0	0	0	0	0	0	0	0	0	0	0	0	0	0	0	0	0	0	0	0	0	0	0	0	0	0	0	0	0	0	33
d__Bacteria	k__norank	p__Verrucomicrobia	c__Verrucomicrobiae	o__Verrucomicrobiales	f__Verrucomicrobiaceae	g__Luteolibacter	s__unclassified_g__Luteolibacter	OTU1445	1	0	0	0	0	0	0	1	0	0	0	0	0	0	0	0	0	0	29	36	8	11	6	17	3	1	0	17	0	0	0	0	1	0	0	0	0	0	131
d__Bacteria	k__norank	p__Proteobacteria	c__Deltaproteobacteria	o__unclassified_c__Deltaproteobacteria	f__unclassified_c__Deltaproteobacteria	g__unclassified_c__Deltaproteobacteria	s__unclassified_c__Deltaproteobacteria	OTU1703	0	0	0	0	0	0	0	0	0	0	0	0	0	0	0	0	0	0	1	0	1	0	0	1	0	0	0	0	0	0	0	0	0	0	0	0	0	0	3
d__Bacteria	k__norank	p__Acidobacteria	c__Acidobacteria	o__Subgroup_7	f__norank_o__Subgroup_7	g__norank_o__Subgroup_7	s__uncultured_Acidobacterium_sp._g__norank_o__Subgroup_7	OTU1831	0	0	0	0	0	0	0	0	0	0	0	0	0	0	0	0	0	0	0	1	0	1	8	0	0	0	1	0	0	0	0	0	0	0	0	0	0	0	11
d__Bacteria	k__norank	p__Proteobacteria	c__Gammaproteobacteria	o__Legionellales	f__Coxiellaceae	g__Coxiella	s__unclassified_g__Coxiella	OTU1660	0	0	0	0	0	0	0	0	0	0	0	0	0	0	0	0	0	0	1	1	2	1	4	0	0	1	0	0	0	0	0	0	3	0	0	0	0	0	13
d__Bacteria	k__norank	p__Actinobacteria	c__Actinobacteria	o__Acidimicrobiales	f__norank_o__Acidimicrobiales	g__norank_o__Acidimicrobiales	s__unclassified_g__norank_o__Acidimicrobiales	OTU1466	0	0	0	0	0	0	0	0	0	0	0	0	0	0	0	0	0	0	1	2	5	0	0	0	0	0	0	1	0	0	0	0	0	0	0	0	0	0	9
d__Bacteria	k__norank	p__Bacteroidetes	c__Bacteroidia	o__Bacteroidales	f__Bacteroidales_S24-7_group	g__norank_f__Bacteroidales_S24-7_group	s__uncultured_rumen_bacterium_g__norank_f__Bacteroidales_S24-7_group	OTU883	0	0	0	0	38	0	0	0	0	0	0	0	0	0	0	0	0	0	0	0	0	0	0	0	0	0	0	0	0	0	0	0	0	0	0	0	0	0	38
d__Bacteria	k__norank	p__Bacteroidetes	c__Bacteroidia	o__Bacteroidales	f__Rikenellaceae	g__Rikenellaceae_RC9_gut_group	s__uncultured_rumen_bacterium_g__Rikenellaceae_RC9_gut_group	OTU490	0	0	11	0	0	0	0	0	0	0	0	0	0	0	0	0	0	0	0	0	0	0	0	0	0	0	0	0	0	0	0	0	0	0	0	0	0	0	11
d__Bacteria	k__norank	p__Proteobacteria	c__Gammaproteobacteria	o__Cellvibrionales	f__Halieaceae	g__Halioglobus	s__unclassified_g__Halioglobus	OTU1489	0	0	0	3	0	0	0	0	0	0	0	0	0	0	0	0	0	0	16	62	8	41	35	6	15	3	14	12	0	0	0	0	0	0	0	0	0	0	215
d__Bacteria	k__norank	p__Firmicutes	c__Clostridia	o__Clostridiales	f__Ruminococcaceae	g__Ruminococcaceae_UCG-010	s__uncultured_bacterium_g__Ruminococcaceae_UCG-010	OTU853	0	0	2	0	6	1	0	0	0	0	0	0	0	0	0	0	0	0	0	0	0	0	0	0	0	0	0	0	0	0	0	0	0	0	0	0	0	0	9
d__Bacteria	k__norank	p__Proteobacteria	c__Betaproteobacteria	o__Burkholderiales	f__Comamonadaceae	g__Comamonas	s__Comamonas_testosteroni_g__Comamonas	OTU1292	1	0	0	1	0	4	25	1	0	1	1	0	0	3	0	0	0	0	0	0	0	0	0	0	0	0	0	0	0	0	0	0	0	0	0	0	0	0	37
d__Bacteria	k__norank	p__Bacteroidetes	c__Bacteroidia	o__Bacteroidales	f__Rikenellaceae	g__U29-B03	s__uncultured_rumen_bacterium_g__U29-B03	OTU329	0	0	18	24	113	4	0	0	0	0	0	0	0	0	0	0	0	0	0	0	0	0	0	0	0	0	0	0	0	0	0	0	0	0	0	0	0	0	159
d__Bacteria	k__norank	p__Nitrospirae	c__Nitrospira	o__norank_c__Nitrospira	f__norank_c__Nitrospira	g__Nitrospira	s__unclassified_g__Nitrospira	OTU1778	0	0	0	0	0	0	0	0	0	0	0	0	0	0	0	0	0	0	0	3	0	6	1	0	1	0	0	1	0	0	0	0	0	0	0	0	0	0	12
d__Bacteria	k__norank	p__Saccharibacteria	c__Unknown_Class_p__Saccharibacteria	o__Unknown_Order_c__Unknown_Class_p__Saccharibacteria	f__Unknown_Family_o__Unknown_Order_c__Unknown_Class_p__Saccharibacteria	g__Candidatus_Saccharimonas	s__uncultured_rumen_bacterium_g__Candidatus_Saccharimonas	OTU367	0	0	15	5	19	5	0	0	0	0	0	0	0	0	0	0	0	0	0	0	3	0	0	0	0	0	0	0	0	0	0	0	0	0	0	0	0	0	47
d__Bacteria	k__norank	p__Proteobacteria	c__Deltaproteobacteria	o__Syntrophobacterales	f__Syntrophaceae	g__Desulfobacca	s__unclassified_g__Desulfobacca	OTU1701	0	0	0	0	0	0	0	0	0	0	0	0	0	0	0	0	0	0	2	6	8	6	3	0	0	3	1	0	0	0	0	0	1	0	0	0	0	0	30
d__Bacteria	k__norank	p__Proteobacteria	c__Alphaproteobacteria	o__Rhodospirillales	f__Rhodospirillaceae	g__norank_f__Rhodospirillaceae	s__uncultured_rumen_bacterium_g__norank_f__Rhodospirillaceae	OTU1021	0	0	0	0	50	0	0	0	0	0	0	0	0	0	0	0	0	0	0	0	0	0	0	0	0	0	0	0	0	0	0	0	0	0	0	0	0	0	50
d__Bacteria	k__norank	p__Verrucomicrobia	c__Verrucomicrobiae	o__Verrucomicrobiales	f__Verrucomicrobiaceae	g__norank_f__Verrucomicrobiaceae	s__uncultured_verrucomicrobium_DEV009	OTU1754	0	0	0	0	0	0	0	0	0	0	0	0	0	0	0	0	0	0	26	25	8	1	4	10	1	2	0	2	0	0	0	0	0	0	0	0	0	0	79
d__Bacteria	k__norank	p__Bacteroidetes	c__Bacteroidia	o__Bacteroidales	f__Bacteroidales_BS11_gut_group	g__norank_f__Bacteroidales_BS11_gut_group	s__unclassified_g__norank_f__Bacteroidales_BS11_gut_group	OTU947	0	0	0	6	8	0	0	0	0	0	0	0	0	0	0	0	0	0	0	0	0	0	0	0	0	0	0	0	0	0	0	0	0	0	0	0	0	0	14
d__Bacteria	k__norank	p__Bacteroidetes	c__Bacteroidia	o__Bacteroidales	f__Rikenellaceae	g__Rikenellaceae_RC9_gut_group	s__unclassified_g__Rikenellaceae_RC9_gut_group	OTU749	0	25	9	48	109	11	0	0	0	0	0	0	0	0	0	0	0	0	0	0	0	0	0	0	0	0	0	0	0	0	0	0	0	0	0	0	0	0	202
d__Bacteria	k__norank	p__Bacteroidetes	c__Bacteroidia	o__Bacteroidales	f__Rikenellaceae	g__Rikenellaceae_RC9_gut_group	s__unclassified_g__Rikenellaceae_RC9_gut_group	OTU747	0	9	67	84	98	70	0	0	0	0	0	0	0	0	0	0	0	0	0	0	0	0	0	0	0	0	0	0	0	0	0	0	0	0	0	0	0	0	328
d__Bacteria	k__norank	p__Cyanobacteria	c__Cyanobacteria	o__norank_c__Cyanobacteria	f__norank_c__Cyanobacteria	g__norank_c__Cyanobacteria	s__Nannochloropsis_oceanica_g__norank	OTU1645	0	0	0	0	0	0	5	0	0	0	0	0	0	0	0	0	0	0	148	109	157	47	53	52	27	47	10	33	0	2	0	0	0	0	0	0	0	0	690
d__Bacteria	k__norank	p__Firmicutes	c__Clostridia	o__Clostridiales	f__Family_XIII	g__[Eubacterium]_nodatum_group	s__unclassified_g__[Eubacterium]_nodatum_group	OTU229	0	11	0	0	0	11	0	0	0	0	0	0	0	0	0	0	0	0	0	0	0	0	0	0	0	0	0	0	0	0	0	0	0	0	0	0	0	0	22
d__Bacteria	k__norank	p__Tenericutes	c__Mollicutes	o__Mollicutes_RF9	f__norank_o__Mollicutes_RF9	g__norank_o__Mollicutes_RF9	s__uncultured_bacterium_g__norank_o__Mollicutes_RF9	OTU1068	0	0	0	0	36	0	0	0	0	0	0	0	0	0	0	0	0	0	0	0	0	0	0	0	0	0	0	0	0	0	0	0	0	0	0	0	0	0	36
d__Bacteria	k__norank	p__Bacteroidetes	c__Bacteroidia	o__Bacteroidales	f__Bacteroidaceae	g__Bacteroides	s__Bacteroides_acidifaciens	OTU604	32	0	73	12	0	13	17	0	0	0	0	0	0	0	0	1	0	0	0	0	0	0	0	0	0	0	0	0	0	0	0	0	1	0	0	0	0	0	149
d__Bacteria	k__norank	p__Verrucomicrobia	c__WCHB1-41	o__norank_c__WCHB1-41	f__norank_c__WCHB1-41	g__norank_c__WCHB1-41	s__unclassified_g__norank_c__WCHB1-41	OTU1463	0	0	0	0	0	0	0	0	0	0	0	0	0	0	0	0	0	0	2	0	0	0	0	0	0	0	0	0	0	0	0	0	0	0	0	0	0	0	2
d__Bacteria	k__norank	p__Proteobacteria	c__Epsilonproteobacteria	o__Campylobacterales	f__Helicobacteraceae	g__Sulfuricurvum	s__unclassified_g__Sulfuricurvum	OTU4	19	0	0	0	0	0	0	0	0	0	0	0	0	0	0	0	0	0	0	0	0	0	0	0	0	0	0	0	0	0	0	0	0	0	0	0	0	0	19
d__Bacteria	k__norank	p__Firmicutes	c__Clostridia	o__Clostridiales	f__unclassified_o__Clostridiales	g__unclassified_o__Clostridiales	s__unclassified_o__Clostridiales	OTU1886	0	0	0	0	0	0	0	0	0	0	0	0	0	0	0	0	0	0	3	6	7	2	6	3	1	0	1	0	0	0	0	0	0	0	0	0	0	0	29
d__Bacteria	k__norank	p__Proteobacteria	c__Gammaproteobacteria	o__Vibrionales	f__Vibrionaceae	g__Vibrio	s__unclassified_g__Vibrio	OTU5	24	0	0	0	0	0	1	0	0	0	0	0	0	0	0	0	0	0	0	0	0	0	0	0	0	0	0	0	0	0	0	0	0	0	0	0	0	0	25
d__Bacteria	k__norank	p__Bacteroidetes	c__Bacteroidia	o__Bacteroidales	f__Prevotellaceae	g__Prevotella_1	s__unclassified_g__Prevotella_1	OTU1164	0	0	14	0	5	9	0	0	0	0	0	0	0	0	0	0	0	0	0	0	0	0	0	0	0	0	0	0	0	0	0	0	0	0	0	0	0	0	28
d__Bacteria	k__norank	p__Firmicutes	c__Clostridia	o__MBA03	f__norank_o__MBA03	g__norank_o__MBA03	s__uncultured_bacterium_g__norank_o__MBA03	OTU1808	0	0	0	0	0	0	0	0	0	0	0	0	0	0	0	0	0	0	0	0	0	0	95	0	0	0	0	0	0	0	0	0	0	0	0	0	0	0	95
d__Bacteria	k__norank	p__Bacteroidetes	c__Cytophagia	o__Cytophagales	f__Cytophagaceae	g__Runella	s__unclassified_g__Runella	OTU1639	0	0	0	0	0	0	0	0	0	0	0	0	0	0	0	0	0	0	0	0	6	0	0	0	0	0	0	0	0	0	0	0	0	0	0	0	0	0	6
d__Bacteria	k__norank	p__Actinobacteria	c__Actinobacteria	o__Frankiales	f__Geodermatophilaceae	g__Geodermatophilus	s__unclassified_g__Geodermatophilus	OTU175	0	18	0	0	0	0	0	0	0	0	0	0	0	0	0	0	0	0	0	0	0	0	0	0	0	0	0	0	0	0	0	0	0	0	0	0	0	0	18
d__Bacteria	k__norank	p__Firmicutes	c__Erysipelotrichia	o__Erysipelotrichales	f__Erysipelotrichaceae	g__unclassified_f__Erysipelotrichaceae	s__unclassified_f__Erysipelotrichaceae	OTU1481	0	0	0	0	0	0	0	0	0	0	0	0	0	0	0	0	0	0	4	7	2	5	0	1	1	1	3	4	0	0	0	0	1	0	0	0	0	0	29
d__Bacteria	k__norank	p__Firmicutes	c__Clostridia	o__Clostridiales	f__Peptostreptococcaceae	g__Romboutsia	s__unclassified_g__Romboutsia	OTU1402	11	10	12	9	16	7	5	7	0	0	5	1702	1	1	0	0	2492	1690	30	19	40	18	80	53	15	25	15	11	38	9	3	63	60	0	0	0	1	1	6449
d__Bacteria	k__norank	p__Firmicutes	c__Clostridia	o__Clostridiales	f__Lachnospiraceae	g__probable_genus_10	s__uncultured_rumen_bacterium_g__probable_genus_10	OTU1058	0	0	8	13	19	13	0	0	0	0	0	0	0	0	0	0	0	0	0	0	0	0	0	0	0	0	0	0	0	0	0	0	0	0	0	0	0	0	53
d__Bacteria	k__norank	p__Cyanobacteria	c__Cyanobacteria	o__Obscuribacterales	f__norank_o__Obscuribacterales	g__norank_o__Obscuribacterales	s__uncultured_bacterium_g__norank_o__Obscuribacterales	OTU2153	0	0	0	0	0	0	0	0	0	0	0	0	0	0	0	0	0	0	0	0	5	0	3	0	0	0	0	0	0	0	0	0	0	0	0	0	2	0	10
d__Bacteria	k__norank	p__unclassified_k__norank	c__unclassified_k__norank	o__unclassified_k__norank	f__unclassified_k__norank	g__unclassified_k__norank	s__unclassified_k__norank	OTU863	0	0	0	0	23	0	0	0	0	0	0	0	0	0	0	0	0	0	0	0	0	0	0	0	0	0	0	0	0	0	0	0	0	0	0	0	0	0	23
d__Bacteria	k__norank	p__unclassified_k__norank	c__unclassified_k__norank	o__unclassified_k__norank	f__unclassified_k__norank	g__unclassified_k__norank	s__unclassified_k__norank	OTU862	0	0	0	0	14	0	0	0	0	0	0	0	0	0	0	0	0	0	0	0	0	0	0	0	0	0	0	0	0	0	0	0	0	0	0	0	0	0	14
d__Bacteria	k__norank	p__Proteobacteria	c__Deltaproteobacteria	o__Desulfovibrionales	f__Desulfovibrionaceae	g__Desulfovibrio	s__Desulfovibrio_desulfuricans_g__Desulfovibrio	OTU2050	0	0	3	17	0	0	0	1	0	0	1	0	0	0	0	0	0	0	0	0	0	0	0	0	0	0	0	0	3	39	0	0	1	0	0	0	0	0	65
d__Bacteria	k__norank	p__Fusobacteria	c__Fusobacteriia	o__Fusobacteriales	f__Leptotrichiaceae	g__Sneathia	s__Sneathia_amnii	OTU2139	0	0	0	0	0	0	0	0	0	0	0	0	0	0	0	0	0	0	0	0	0	0	0	0	0	0	0	0	0	0	0	0	2	0	0	0	0	0	2
d__Bacteria	k__norank	p__Proteobacteria	c__Gammaproteobacteria	o__Gammaproteobacteria_Incertae_Sedis	f__Unknown_Family_o__Gammaproteobacteria_Incertae_Sedis	g__norank_f__Unknown_Family_o__Gammaproteobacteria_Incertae_Sedis	s__uncultured_bacterium_g__norank_f__Unknown_Family_o__Gammaproteobacteria_Incertae_Sedis	OTU1804	0	0	0	0	0	0	0	0	0	0	0	0	0	0	0	0	0	0	1	1	0	6	1	0	2	0	0	0	0	0	0	0	0	0	0	0	0	0	11
d__Bacteria	k__norank	p__Proteobacteria	c__Betaproteobacteria	o__Hydrogenophilales	f__Hydrogenophilaceae	g__norank_f__Hydrogenophilaceae	s__bacterium_2013Ark19i	OTU1659	0	0	0	0	0	0	0	0	0	0	0	0	0	0	0	0	0	0	0	0	48	0	0	0	0	0	0	0	0	0	0	0	0	0	0	0	0	0	48
d__Bacteria	k__norank	p__Bacteroidetes	c__Flavobacteriia	o__Flavobacteriales	f__Flavobacteriaceae	g__Flavobacterium	s__Flavobacterium_cheniae	OTU709	5	0	2	13	0	0	0	0	0	0	0	0	0	0	0	0	0	0	0	0	0	0	0	0	0	0	0	0	0	0	0	0	0	0	0	0	0	0	20
d__Bacteria	k__norank	p__Tenericutes	c__Mollicutes	o__Anaeroplasmatales	f__Anaeroplasmataceae	g__Anaeroplasma	s__uncultured_rumen_bacterium_g__Anaeroplasma	OTU982	0	0	0	0	15	0	0	0	0	0	0	0	0	0	0	0	0	0	0	0	0	0	0	0	0	0	0	0	0	0	0	0	0	0	0	0	0	0	15
d__Bacteria	k__norank	p__Parcubacteria	c__Candidatus_Falkowbacteria	o__norank_c__Candidatus_Falkowbacteria	f__norank_c__Candidatus_Falkowbacteria	g__norank_c__Candidatus_Falkowbacteria	s__uncultured_Parcubacteria_group_bacterium_g__norank_c__Candidatus_Falkowbacteria	OTU56	21	0	0	0	0	0	0	0	0	0	0	0	0	0	0	0	0	0	0	0	0	0	0	0	0	0	0	0	0	0	0	0	0	0	0	0	0	0	21
d__Bacteria	k__norank	p__Firmicutes	c__Clostridia	o__Clostridiales	f__Lachnospiraceae	g__[Eubacterium]_oxidoreducens_group	s__unidentified_rumen_bacterium_RFN66	OTU968	0	0	1	2	94	29	0	0	0	0	0	0	0	0	0	0	0	0	0	0	0	0	0	0	0	0	0	0	0	0	0	0	0	0	0	0	0	0	126
d__Bacteria	k__norank	p__Verrucomicrobia	c__Spartobacteria	o__Chthoniobacterales	f__Chthoniobacteraceae	g__Chthoniobacter	s__uncultured_Verrucomicrobia_bacterium_g__Chthoniobacter	OTU1740	0	0	0	0	0	0	0	0	0	0	0	0	0	0	0	0	0	0	2	3	2	2	3	4	1	0	0	2	0	0	0	0	0	0	0	0	0	0	19
d__Bacteria	k__norank	p__Firmicutes	c__Clostridia	o__Clostridiales	f__Clostridiaceae_1	g__Clostridium_sensu_stricto_1	s__unclassified_g__Clostridium_sensu_stricto_1	OTU1956	4	5	3	3	2	0	2	4	0	0	3	0	0	0	0	0	0	0	92	377	528	282	247	24	217	46	498	33	13	20	1	8	131	0	0	0	0	0	2543
d__Bacteria	k__norank	p__Firmicutes	c__Clostridia	o__Clostridiales	f__Clostridiaceae_1	g__Clostridium_sensu_stricto_1	s__unclassified_g__Clostridium_sensu_stricto_1	OTU1950	0	0	2	0	0	0	0	0	0	0	0	0	0	0	0	0	0	0	34	320	77	718	314	3390	1148	372	2484	7	0	0	0	0	31	0	0	0	0	0	8897
d__Bacteria	k__norank	p__Acidobacteria	c__Acidobacteria	o__Acidobacteriales	f__Acidobacteriaceae__Subgroup_1_	g__Granulicella	s__unclassified_g__Granulicella	OTU137	6	0	0	0	0	0	0	0	0	0	0	0	0	0	0	0	0	0	0	0	0	0	0	0	0	0	0	0	0	0	0	0	0	0	0	0	0	0	6
d__Bacteria	k__norank	p__Tenericutes	c__Mollicutes	o__Mollicutes_RF9	f__norank_o__Mollicutes_RF9	g__norank_o__Mollicutes_RF9	s__unclassified_g__norank_o__Mollicutes_RF9	OTU808	0	0	23	0	31	11	0	0	0	0	0	0	0	0	0	0	0	0	0	0	0	0	0	0	0	0	0	0	0	0	0	0	0	0	0	0	0	0	65
d__Bacteria	k__norank	p__Actinobacteria	c__Actinobacteria	o__Micromonosporales	f__Micromonosporaceae	g__unclassified_f__Micromonosporaceae	s__unclassified_f__Micromonosporaceae	OTU1677	0	0	2	0	0	0	0	0	0	0	0	0	0	0	0	0	0	0	0	0	2	3	1	0	0	0	0	0	0	0	0	0	0	0	0	0	0	0	8
d__Bacteria	k__norank	p__Bacteroidetes	c__Bacteroidia	o__Bacteroidales	f__Prevotellaceae	g__unclassified_f__Prevotellaceae	s__unclassified_f__Prevotellaceae	OTU634	0	0	0	8	0	0	0	0	0	0	0	0	0	0	0	0	0	0	0	0	0	0	0	0	0	0	0	0	0	0	0	0	0	0	0	0	0	0	8
d__Bacteria	k__norank	p__Proteobacteria	c__Alphaproteobacteria	o__Rickettsiales	f__Mitochondria	g__norank_f__Mitochondria	s__unclassified_g__norank_f__Mitochondria	OTU1301	0	32	0	0	0	0	106	1	0	1	1	0	0	0	0	0	0	0	0	0	0	0	0	0	0	0	0	0	0	0	0	0	0	0	0	0	1	0	142
d__Bacteria	k__norank	p__Chlamydiae	c__Chlamydiae	o__Chlamydiales	f__Parachlamydiaceae	g__Candidatus_Protochlamydia	s__unclassified_g__Candidatus_Protochlamydia	OTU1682	0	0	0	0	0	0	0	0	0	0	0	0	0	0	0	0	0	0	0	1	5	0	0	1	0	0	0	0	0	0	0	0	0	0	0	0	0	0	7
d__Bacteria	k__norank	p__Proteobacteria	c__Gammaproteobacteria	o__Enterobacteriales	f__Enterobacteriaceae	g__Morganella	s__unclassified_g__Morganella	OTU2045	0	0	0	0	0	0	0	2	1	0	4	0	7	2	1	0	0	0	0	0	0	0	0	0	0	0	0	0	62	1179	23	31	12	0	1	0	0	0	1325
d__Bacteria	k__norank	p__Actinobacteria	c__Actinobacteria	o__norank_c__Actinobacteria	f__norank_c__Actinobacteria	g__norank_c__Actinobacteria	s__uncultured_alpha_proteobacterium_g__norank_c__Actinobacteria	OTU810	0	0	0	0	12	0	0	0	0	0	0	0	0	0	0	0	0	0	0	0	0	0	0	0	0	0	0	0	0	0	0	0	0	0	0	0	0	0	12
d__Bacteria	k__norank	p__Firmicutes	c__Clostridia	o__Clostridiales	f__Ruminococcaceae	g__Ruminiclostridium_1	s__unclassified_g__Ruminiclostridium_1	OTU216	0	3	27	9	26	0	0	0	0	0	0	0	0	0	0	0	0	0	0	0	0	0	0	0	0	0	0	0	0	0	0	0	0	0	0	0	0	0	65
d__Bacteria	k__norank	p__Verrucomicrobia	c__Verrucomicrobiae	o__Verrucomicrobiales	f__Verrucomicrobiaceae	g__norank_f__Verrucomicrobiaceae	s__uncultured_soil_bacterium_g__norank_f__Verrucomicrobiaceae	OTU1857	0	0	0	0	0	5	0	0	0	0	0	0	0	0	0	0	0	0	129	34	26	18	4	39	1	6	3	6	0	0	0	0	0	0	0	0	0	0	271
d__Bacteria	k__norank	p__Chloroflexi	c__SHA-26	o__norank_c__SHA-26	f__norank_c__SHA-26	g__norank_c__SHA-26	s__uncultured_soil_bacterium_g__norank_c__SHA-26	OTU1776	0	0	0	0	0	0	0	0	0	0	0	0	0	0	0	0	0	0	1	5	2	4	0	2	0	0	0	0	0	0	0	0	0	0	0	0	0	0	14
d__Bacteria	k__norank	p__Firmicutes	c__Clostridia	o__Clostridiales	f__Ruminococcaceae	g__unclassified_f__Ruminococcaceae	s__unclassified_f__Ruminococcaceae	OTU1602	0	0	0	0	0	0	0	0	0	0	0	0	0	0	0	0	0	0	0	0	3	0	0	0	0	0	0	0	0	0	0	0	0	0	0	0	0	0	3
d__Bacteria	k__norank	p__Proteobacteria	c__Gammaproteobacteria	o__Legionellales	f__Legionellaceae	g__Legionella	s__uncultured_bacterium_g__Legionella	OTU506	0	0	12	0	0	0	0	0	0	0	0	0	0	0	0	0	0	0	0	0	0	0	0	0	0	0	0	0	0	0	0	0	0	0	0	0	0	0	12
d__Bacteria	k__norank	p__Bacteroidetes	c__Flavobacteriia	o__Flavobacteriales	f__Flavobacteriaceae	g__Myroides	s__Myroides_odoratus	OTU1268	0	0	0	0	0	0	4	0	0	0	0	0	0	0	0	0	0	0	0	0	0	0	0	0	0	0	0	0	0	0	0	0	0	0	0	0	0	0	4
d__Bacteria	k__norank	p__Proteobacteria	c__Betaproteobacteria	o__SC-I-84	f__norank_o__SC-I-84	g__norank_o__SC-I-84	s__uncultured_Burkholderiales_bacterium_g__norank_o__SC-I-84	OTU414	0	0	4	0	0	0	0	0	0	0	0	0	0	0	0	0	0	0	0	0	0	0	0	0	0	0	0	0	0	0	0	0	0	0	0	0	0	0	4
d__Bacteria	k__norank	p__Proteobacteria	c__Gammaproteobacteria	o__Pseudomonadales	f__Moraxellaceae	g__Acinetobacter	s__uncultured_organism_g__Acinetobacter	OTU1051	15	5	12	3	5	3	0	0	0	6	6	2	0	1	0	0	0	0	0	0	0	0	0	0	0	0	0	0	1	0	0	0	0	0	0	0	0	0	59
d__Bacteria	k__norank	p__Firmicutes	c__Clostridia	o__Clostridiales	f__Lachnospiraceae	g__unclassified_f__Lachnospiraceae	s__unclassified_f__Lachnospiraceae	OTU431	0	0	15	0	0	0	0	0	0	0	0	0	0	0	0	0	0	0	0	0	0	0	0	0	0	0	0	0	0	0	0	0	0	0	0	0	0	0	15
d__Bacteria	k__norank	p__unclassified_k__norank	c__unclassified_k__norank	o__unclassified_k__norank	f__unclassified_k__norank	g__unclassified_k__norank	s__unclassified_k__norank	OTU1045	0	0	0	0	24	0	0	0	0	0	0	0	0	0	0	0	0	0	0	0	0	0	0	0	0	0	0	0	0	0	0	0	0	0	0	0	0	0	24
d__Bacteria	k__norank	p__unclassified_k__norank	c__unclassified_k__norank	o__unclassified_k__norank	f__unclassified_k__norank	g__unclassified_k__norank	s__unclassified_k__norank	OTU1046	0	0	0	0	5	0	0	0	0	0	0	0	0	0	0	0	0	0	0	0	0	0	0	0	0	0	0	0	0	0	0	0	0	0	0	0	0	0	5
d__Bacteria	k__norank	p__Firmicutes	c__Clostridia	o__Clostridiales	f__Lachnospiraceae	g__Acetitomaculum	s__uncultured_rumen_bacterium_g__Acetitomaculum	OTU1235	0	0	14	43	1	16	0	0	0	0	0	0	0	0	0	0	0	0	0	0	0	0	0	0	0	0	0	0	0	0	0	0	0	0	0	0	0	0	74
d__Bacteria	k__norank	p__Proteobacteria	c__Betaproteobacteria	o__Burkholderiales	f__Oxalobacteraceae	g__Massilia	s__unclassified_g__Massilia	OTU391	2	2	31	0	0	0	45	0	0	1	3	0	0	0	0	0	0	0	0	0	0	0	0	0	0	0	0	0	0	0	0	0	0	0	0	0	0	0	84
d__Bacteria	k__norank	p__Firmicutes	c__Clostridia	o__Clostridiales	f__unclassified_o__Clostridiales	g__unclassified_o__Clostridiales	s__unclassified_o__Clostridiales	OTU1644	0	0	0	0	0	0	0	0	0	0	0	0	0	0	0	0	0	0	2	1	5	1	0	1	0	1	0	1	0	0	0	0	0	0	0	0	0	0	12
d__Bacteria	k__norank	p__Cyanobacteria	c__Cyanobacteria	o__norank_c__Cyanobacteria	f__norank_c__Cyanobacteria	g__norank_c__Cyanobacteria	s__Auxenochlorella_protothecoides_g__norank	OTU636	0	0	0	31	0	0	0	0	0	0	0	0	0	0	0	0	0	0	0	0	0	0	0	0	0	0	0	0	0	2	0	1	10	0	0	0	0	0	44
d__Bacteria	k__norank	p__Acidobacteria	c__Acidobacteria	o__norank_c__Acidobacteria	f__norank_c__Acidobacteria	g__norank_c__Acidobacteria	s__wastewater_metagenome_g__norank_c__Acidobacteria	OTU1557	0	0	0	0	0	0	0	0	0	0	0	0	0	0	0	0	0	0	4	13	1	0	1	0	0	0	0	0	0	0	0	0	0	0	0	0	0	0	19
d__Bacteria	k__norank	p__Proteobacteria	c__Betaproteobacteria	o__Rhodocyclales	f__Rhodocyclaceae	g__Propionivibrio	s__uncultured_bacterium_g__Propionivibrio	OTU1265	0	0	0	0	0	0	6	0	0	0	0	0	0	0	0	0	0	0	0	0	0	0	0	0	0	0	0	0	0	0	0	0	2	0	0	0	0	0	8
d__Bacteria	k__norank	p__Firmicutes	c__Clostridia	o__Clostridiales	f__Ruminococcaceae	g__[Eubacterium]_coprostanoligenes_group	s__uncultured_bacterium_g__[Eubacterium]_coprostanoligenes_group	OTU847	10	0	0	0	22	0	0	0	0	0	1	0	0	0	0	0	0	0	0	0	0	0	0	0	0	0	0	0	0	0	0	0	1	0	0	0	0	0	34
d__Bacteria	k__norank	p__Bacteroidetes	c__Flavobacteriia	o__Flavobacteriales	f__Flavobacteriaceae	g__Chryseobacterium	s__uncultured_Bacteroidetes_bacterium_g__Chryseobacterium	OTU693	119	56	0	8408	212	1857	0	0	0	1	4	0	0	0	0	0	0	0	3	2	8	0	0	0	0	0	0	0	0	0	0	0	0	0	0	0	0	0	10670
d__Bacteria	k__norank	p__Gracilibacteria	c__norank_p__Gracilibacteria	o__norank_p__Gracilibacteria	f__norank_p__Gracilibacteria	g__norank_p__Gracilibacteria	s__unclassified_g__norank_p__Gracilibacteria	OTU1105	0	0	0	0	0	25	0	0	0	0	0	0	0	0	0	0	0	0	0	0	0	0	0	0	0	0	0	0	0	0	0	0	0	0	0	0	0	0	25
d__Bacteria	k__norank	p__Bacteroidetes	c__Bacteroidia	o__Bacteroidales	f__Porphyromonadaceae	g__Parabacteroides	s__unclassified_g__Parabacteroides	OTU269	0	0	12	0	1	0	0	0	0	0	0	0	0	0	0	0	0	0	0	0	0	0	0	0	0	0	0	0	0	0	0	0	0	0	0	0	0	0	13
d__Bacteria	k__norank	p__Bacteroidetes	c__Sphingobacteriia	o__Sphingobacteriales	f__Sphingobacteriaceae	g__Sphingobacterium	s__Sphingobacterium_mizutaii	OTU104	11	2	2	3	0	6	0	0	0	0	0	0	0	0	0	0	0	0	0	0	0	0	0	0	0	0	0	0	0	0	0	0	0	0	0	0	0	0	24
d__Bacteria	k__norank	p__Proteobacteria	c__Alphaproteobacteria	o__Sphingomonadales	f__Sphingomonadaceae	g__Sphingomonas	s__unclassified_g__Sphingomonas	OTU1367	33	28	29	3	28	20	655	131	11	43	83	0	0	0	0	0	0	0	1	0	0	0	6	0	1	0	0	0	0	0	0	0	1	0	0	0	0	0	1073
d__Bacteria	k__norank	p__Firmicutes	c__Erysipelotrichia	o__Erysipelotrichales	f__Erysipelotrichaceae	g__Allobaculum	s__unclassified_g__Allobaculum	OTU90	23	0	0	0	0	0	0	0	0	0	0	0	0	0	0	0	0	0	0	0	0	0	0	0	0	0	0	0	0	0	0	0	0	0	0	0	0	0	23
d__Bacteria	k__norank	p__unclassified_k__norank	c__unclassified_k__norank	o__unclassified_k__norank	f__unclassified_k__norank	g__unclassified_k__norank	s__unclassified_k__norank	OTU1138	0	0	0	0	0	19	0	0	0	0	0	0	0	0	0	0	0	0	0	0	0	0	0	0	0	0	0	0	0	0	0	0	0	0	0	0	0	0	19
d__Bacteria	k__norank	p__Chloroflexi	c__Anaerolineae	o__Anaerolineales	f__Anaerolineaceae	g__norank_f__Anaerolineaceae	s__unclassified_g__norank_f__Anaerolineaceae	OTU1663	0	0	0	0	0	0	0	5	0	0	0	0	0	0	0	0	0	0	8	10	16	3	0	4	1	2	0	1	3	5	1	2	3	0	0	0	0	0	64
d__Bacteria	k__norank	p__unclassified_k__norank	c__unclassified_k__norank	o__unclassified_k__norank	f__unclassified_k__norank	g__unclassified_k__norank	s__unclassified_k__norank	OTU1135	0	0	0	0	0	11	0	0	0	0	0	0	0	0	0	0	0	0	0	0	0	0	0	0	0	0	0	0	0	0	0	0	0	0	0	0	0	0	11
d__Bacteria	k__norank	p__Verrucomicrobia	c__Verrucomicrobiae	o__Verrucomicrobiales	f__Verrucomicrobiaceae	g__norank_f__Verrucomicrobiaceae	s__unclassified_g__norank_f__Verrucomicrobiaceae	OTU1909	1	0	0	0	0	0	0	0	0	0	0	0	0	0	0	0	0	0	4	5	2	1	1	2	0	2	1	4	0	0	0	0	0	0	0	0	0	0	23
d__Bacteria	k__norank	p__Cyanobacteria	c__Cyanobacteria	o__norank_c__Cyanobacteria	f__norank_c__Cyanobacteria	g__norank_c__Cyanobacteria	s__Mychonastes_homosphaera	OTU1983	0	0	0	0	0	0	0	0	0	0	0	0	0	0	0	0	0	0	2	11	13	0	4	1	0	1	1	6	0	0	0	0	0	0	0	0	0	0	39
d__Bacteria	k__norank	p__Bacteroidetes	c__Bacteroidia	o__Bacteroidales	f__Prevotellaceae	g__Prevotella_1	s__Prevotella_aff._ruminicola_Tc2-24	OTU1039	0	0	0	0	27	0	0	0	0	0	0	0	0	0	0	0	0	0	0	0	0	0	0	0	0	0	0	0	0	0	0	0	0	0	0	0	0	0	27
d__Bacteria	k__norank	p__Gemmatimonadetes	c__Gemmatimonadetes	o__Longimicrobiales	f__Longimicrobiaceae	g__norank_f__Longimicrobiaceae	s__uncultured_bacterium_g__norank_f__Longimicrobiaceae	OTU1333	0	0	0	0	0	0	0	8	0	0	0	0	0	0	0	0	0	0	0	0	0	0	0	0	0	0	0	0	0	0	0	0	0	0	0	0	0	0	8
d__Bacteria	k__norank	p__Firmicutes	c__Clostridia	o__Clostridiales	f__Lachnospiraceae	g__Lachnospiraceae_UCG-009	s__uncultured_rumen_bacterium_g__Lachnospiraceae_UCG-009	OTU1154	0	0	0	19	21	16	0	0	0	0	0	0	0	0	0	0	0	0	0	0	0	0	0	0	0	0	0	0	0	0	0	0	0	0	0	0	0	0	56
d__Bacteria	k__norank	p__unclassified_k__norank	c__unclassified_k__norank	o__unclassified_k__norank	f__unclassified_k__norank	g__unclassified_k__norank	s__unclassified_k__norank	OTU1300	0	0	0	0	0	0	13	0	0	0	0	0	0	0	0	0	0	0	0	0	0	0	0	0	0	0	0	0	0	0	0	0	0	0	0	0	0	0	13
d__Bacteria	k__norank	p__Bacteroidetes	c__Bacteroidia	o__Bacteroidales	f__Prevotellaceae	g__Prevotellaceae_UCG-003	s__unclassified_g__Prevotellaceae_UCG-003	OTU845	0	0	0	4	46	9	0	0	0	0	0	0	0	0	0	0	0	0	0	0	0	0	0	0	0	0	0	0	0	0	0	0	0	0	0	0	0	0	59
d__Bacteria	k__norank	p__Synergistetes	c__Synergistia	o__Synergistales	f__Synergistaceae	g__Fretibacterium	s__uncultured_bacterium_g__Fretibacterium	OTU876	0	0	0	0	8	0	0	0	0	0	0	0	0	0	0	0	0	0	0	0	0	0	0	0	0	0	0	0	0	0	0	0	0	0	0	0	0	0	8
d__Bacteria	k__norank	p__Proteobacteria	c__Alphaproteobacteria	o__Rhodospirillales	f__Acetobacteraceae	g__unclassified_f__Acetobacteraceae	s__unclassified_f__Acetobacteraceae	OTU1745	0	0	0	0	0	0	0	0	0	0	0	0	0	0	0	0	0	0	2	2	0	9	3	0	2	1	1	0	0	0	0	0	0	0	0	0	0	0	20
d__Bacteria	k__norank	p__Cyanobacteria	c__Cyanobacteria	o__norank_c__Cyanobacteria	f__norank_c__Cyanobacteria	g__norank_c__Cyanobacteria	s__unclassified_g__norank_c__Cyanobacteria	OTU284	0	0	18	1	1	4	7	5	2	9	4	1	0	0	0	0	0	0	0	0	0	0	12	0	0	0	0	0	0	0	0	0	0	0	1	0	1	0	66
d__Bacteria	k__norank	p__Proteobacteria	c__Gammaproteobacteria	o__Legionellales	f__Coxiellaceae	g__Coxiella	s__uncultured_Coxiellaceae_bacterium_g__Coxiella	OTU1664	0	0	0	0	0	0	0	0	0	0	0	0	0	0	0	0	0	0	0	0	13	0	0	0	0	0	0	0	0	0	0	0	0	0	0	0	0	0	13
d__Bacteria	k__norank	p__Firmicutes	c__Bacilli	o__Bacillales	f__Bacillaceae	g__Halobacillus	s__unclassified_g__Halobacillus	OTU764	0	0	0	0	19	0	0	0	0	0	0	0	0	0	0	0	0	0	0	0	0	0	0	0	0	0	0	0	0	0	0	0	0	0	0	0	0	0	19
d__Bacteria	k__norank	p__Proteobacteria	c__Deltaproteobacteria	o__Myxococcales	f__BIrii41	g__norank_f__BIrii41	s__uncultured_bacterium_g__norank_f__BIrii41	OTU1313	0	0	0	0	0	0	0	15	0	0	0	0	0	0	0	0	0	0	0	0	0	0	0	0	0	0	0	0	0	0	0	0	0	0	0	0	0	0	15
d__Bacteria	k__norank	p__Bacteroidetes	c__Bacteroidia	o__Bacteroidales	f__Porphyromonadaceae	g__Porphyromonas	s__uncultured_Bacteroides_sp._g__Porphyromonas	OTU1198	0	0	0	0	0	41	0	0	0	0	0	0	0	0	0	0	0	0	0	0	0	0	0	0	0	0	0	0	0	0	0	0	0	0	0	0	0	0	41
d__Bacteria	k__norank	p__Chloroflexi	c__KD4-96	o__norank_c__KD4-96	f__norank_c__KD4-96	g__norank_c__KD4-96	s__unclassified_g__norank_c__KD4-96	OTU1897	0	0	0	0	1	0	0	0	0	0	0	0	0	0	0	0	0	0	31	30	78	8	35	9	15	14	0	2	0	0	0	0	0	0	0	0	0	0	223
d__Bacteria	k__norank	p__Actinobacteria	c__Actinobacteria	o__Frankiales	f__Sporichthyaceae	g__hgcI_clade	s__uncultured_actinobacterium_g__hgcI_clade	OTU1629	0	0	0	0	0	0	0	0	0	0	0	0	0	0	0	0	0	0	1	0	14	0	3	0	0	0	0	0	0	0	0	0	0	0	0	0	0	0	18
d__Bacteria	k__norank	p__Actinobacteria	c__Actinobacteria	o__Propionibacteriales	f__Propionibacteriaceae	g__Microlunatus	s__unclassified_g__Microlunatus	OTU283	0	5	3	0	2	0	0	0	0	0	0	0	0	0	0	0	0	0	0	0	0	0	0	0	0	0	0	0	0	0	0	0	0	0	0	0	0	0	10
d__Bacteria	k__norank	p__Actinobacteria	c__Actinobacteria	o__Gaiellales	f__norank_o__Gaiellales	g__norank_o__Gaiellales	s__unclassified_g__norank_o__Gaiellales	OTU978	1	0	0	0	24	0	0	0	0	0	0	0	0	0	0	0	0	0	0	0	0	0	0	0	0	0	0	0	0	0	0	0	0	0	0	0	0	0	25
d__Bacteria	k__norank	p__Proteobacteria	c__Betaproteobacteria	o__Burkholderiales	f__Alcaligenaceae	g__Parasutterella	s__Parasutterella_excrementihominis	OTU447	0	0	13	0	0	0	0	0	0	0	0	0	0	0	0	0	0	0	0	0	0	0	0	0	0	0	0	0	0	0	0	0	0	0	0	0	0	0	13
d__Bacteria	k__norank	p__Firmicutes	c__Clostridia	o__Clostridiales	f__Lachnospiraceae	g__[Eubacterium]_ruminantium_group	s__unclassified_g__[Eubacterium]_ruminantium_group	OTU939	0	0	0	0	14	0	0	0	0	0	0	0	0	0	0	0	0	0	0	0	0	0	0	0	0	0	0	0	0	0	0	0	0	0	0	0	0	0	14
d__Bacteria	k__norank	p__Actinobacteria	c__Actinobacteria	o__Solirubrobacterales	f__unclassified_o__Solirubrobacterales	g__unclassified_o__Solirubrobacterales	s__unclassified_o__Solirubrobacterales	OTU107	6	0	0	0	0	0	0	0	0	0	0	0	0	0	0	0	0	0	0	0	0	0	0	0	0	0	0	0	0	0	0	0	0	0	0	0	0	0	6
d__Bacteria	k__norank	p__Chloroflexi	c__Caldilineae	o__Caldilineales	f__Caldilineaceae	g__norank_f__Caldilineaceae	s__uncultured_bacterium_g__norank_f__Caldilineaceae	OTU1700	0	0	0	0	0	0	0	0	0	0	0	0	0	0	0	0	0	0	2	3	9	0	1	0	0	0	0	1	0	0	0	0	0	0	0	0	0	0	16
d__Bacteria	k__norank	p__Proteobacteria	c__Gammaproteobacteria	o__Enterobacteriales	f__Enterobacteriaceae	g__Hafnia-Obesumbacterium	s__unclassified_g__Hafnia-Obesumbacterium	OTU1419	17	17	8	19	57	77	0	2	0	1	5	613	0	1	1	15451	199	164	0	0	0	0	0	1	1	1	0	0	0	1	0	0	0	0	2	1	0	42	16681
d__Bacteria	k__norank	p__Proteobacteria	c__Gammaproteobacteria	o__Cellvibrionales	f__Halieaceae	g__Haliea	s__uncultured_soil_bacterium_g__Haliea	OTU1758	0	0	0	0	0	0	0	0	0	0	0	0	0	0	0	0	0	0	5	5	9	5	4	0	0	0	0	1	0	0	0	0	0	0	0	0	0	0	29
d__Bacteria	k__norank	p__Deinococcus-Thermus	c__Deinococci	o__Deinococcales	f__Deinococcaceae	g__Deinococcus	s__Deinococcus_sp._Lab-1	OTU1091	0	0	0	0	0	11	0	0	0	0	0	0	0	0	0	0	0	0	0	0	0	0	0	0	0	0	0	0	0	0	0	0	0	0	0	0	0	0	11
d__Bacteria	k__norank	p__Firmicutes	c__Clostridia	o__Clostridiales	f__Lachnospiraceae	g__Lachnospiraceae_UCG-008	s__uncultured_rumen_bacterium_g__Lachnospiraceae_UCG-008	OTU966	0	0	31	124	97	18	0	0	0	0	0	0	0	0	0	0	0	0	0	0	0	0	0	0	0	0	0	0	0	0	0	0	0	0	0	0	0	0	270
d__Bacteria	k__norank	p__Proteobacteria	c__Betaproteobacteria	o__Burkholderiales	f__Alcaligenaceae	g__Achromobacter	s__unclassified_g__Achromobacter	OTU392	71	156	115	27	84	31	216	20	0	11	5	0	0	3	0	1	0	0	0	1	5	1	23	0	0	1	0	0	0	1	0	0	5	1	1	0	8	1	788
d__Bacteria	k__norank	p__Proteobacteria	c__Alphaproteobacteria	o__Sphingomonadales	f__Sphingomonadaceae	g__Sphingopyxis	s__Sphingopyxis_chilensis	OTU1214	9	9	23	1	0	2	0	2	0	2	0	0	0	3	0	0	0	0	0	0	0	0	0	0	0	0	0	0	1	0	0	0	0	0	0	0	0	0	52
d__Bacteria	k__norank	p__Proteobacteria	c__Gammaproteobacteria	o__Oceanospirillales	f__Halomonadaceae	g__Halomonas	s__uncultured_soil_bacterium_g__Halomonas	OTU6	4	0	0	0	0	0	0	0	0	0	0	0	0	0	0	0	0	0	0	3	1	1	8	0	0	1	0	0	0	0	0	0	0	0	0	0	0	0	18
d__Bacteria	k__norank	p__Proteobacteria	c__Betaproteobacteria	o__SC-I-84	f__norank_o__SC-I-84	g__norank_o__SC-I-84	s__unclassified_g__norank_o__SC-I-84	OTU1939	0	0	0	0	0	0	0	0	0	0	0	0	0	0	0	0	0	0	13	15	3	5	6	5	1	0	2	4	0	0	0	0	0	0	0	0	0	0	54
d__Bacteria	k__norank	p__Proteobacteria	c__Alphaproteobacteria	o__Rhizobiales	f__Methylocystaceae	g__Pleomorphomonas	s__uncultured_bacterium_g__Pleomorphomonas	OTU1845	0	0	0	0	0	0	0	1	0	0	0	0	0	0	0	0	0	0	11	10	14	11	11	5	1	5	2	3	0	0	0	0	10	0	0	0	0	0	84
d__Bacteria	k__norank	p__Verrucomicrobia	c__Verrucomicrobiae	o__Verrucomicrobiales	f__Verrucomicrobiaceae	g__Luteolibacter	s__uncultured_Verrucomicrobiaceae_bacterium_g__Luteolibacter	OTU1486	0	0	0	0	0	0	0	0	0	0	0	0	0	0	0	0	0	0	34	39	20	16	5	20	4	6	0	6	0	0	0	0	0	0	0	0	0	0	150
d__Bacteria	k__norank	p__Actinobacteria	c__Actinobacteria	o__Gaiellales	f__norank_o__Gaiellales	g__norank_o__Gaiellales	s__uncultured_Conexibacteraceae_bacterium_g__norank	OTU1018	2	0	0	14	15	0	0	0	0	0	0	0	0	0	0	0	0	0	0	0	0	0	0	0	0	0	0	0	0	0	0	0	0	0	0	0	0	0	31
d__Bacteria	k__norank	p__Firmicutes	c__Clostridia	o__Clostridiales	f__Lachnospiraceae	g__unclassified_f__Lachnospiraceae	s__unclassified_f__Lachnospiraceae	OTU942	208	169	210	42	24	17	0	3	0	0	3	0	0	3	0	0	0	0	0	0	0	0	0	0	0	0	0	0	1	0	0	0	12	0	0	0	0	0	692
d__Bacteria	k__norank	p__Verrucomicrobia	c__Spartobacteria	o__Chthoniobacterales	f__LD29	g__norank_f__LD29	s__unclassified_g__norank_f__LD29	OTU1343	0	0	0	0	0	0	9	15	0	0	0	0	0	0	0	0	0	0	0	0	0	0	0	0	0	0	0	0	0	1	1	1	1	0	0	0	0	0	28
d__Bacteria	k__norank	p__Bacteroidetes	c__Bacteroidia	o__Bacteroidales	f__Bacteroidales_BS11_gut_group	g__norank_f__Bacteroidales_BS11_gut_group	s__unclassified_g__norank_f__Bacteroidales_BS11_gut_group	OTU558	0	94	196	230	643	208	0	0	0	0	0	0	0	0	0	0	0	0	0	0	0	0	0	0	0	0	0	0	0	0	0	0	0	0	0	0	0	0	1371
d__Bacteria	k__norank	p__Firmicutes	c__Clostridia	o__Clostridiales	f__Lachnospiraceae	g__Acetitomaculum	s__uncultured_bacterium_g__Acetitomaculum	OTU834	0	0	13	3	31	2	0	0	0	0	0	0	0	0	0	0	0	0	0	0	0	0	0	0	0	0	0	0	0	0	0	0	0	0	0	0	0	0	49
d__Bacteria	k__norank	p__Firmicutes	c__Clostridia	o__Clostridiales	f__Ruminococcaceae	g__Anaerotruncus	s__uncultured_bacterium_g__Anaerotruncus	OTU1788	0	0	0	0	0	0	0	0	0	0	0	0	0	0	0	0	0	0	0	0	4	3	4	0	0	0	0	0	0	0	0	0	9	0	0	0	0	0	20
d__Bacteria	k__norank	p__Proteobacteria	c__Deltaproteobacteria	o__Desulfurellales	f__Desulfurellaceae	g__H16	s__unclassified_g__H16	OTU51	30	0	0	0	0	1	0	0	0	0	0	0	0	0	0	0	0	0	0	0	0	0	0	0	0	0	0	0	0	0	0	0	0	0	0	0	0	0	31
d__Bacteria	k__norank	p__Bacteroidetes	c__Bacteroidia	o__Bacteroidales	f__unclassified_o__Bacteroidales	g__unclassified_o__Bacteroidales	s__unclassified_o__Bacteroidales	OTU567	0	0	44	0	0	0	0	0	0	0	0	0	0	0	0	0	0	0	0	0	0	0	0	0	0	0	0	0	0	0	0	0	0	0	0	0	0	0	44
d__Bacteria	k__norank	p__Proteobacteria	c__Betaproteobacteria	o__Burkholderiales	f__Burkholderiaceae	g__Polynucleobacter	s__Polynucleobacter_asymbioticus	OTU1803	0	0	0	0	0	0	0	0	0	0	0	0	0	0	0	0	0	0	0	0	50	0	213	0	0	0	0	0	0	0	0	0	0	0	1	0	1	0	265
d__Bacteria	k__norank	p__Firmicutes	c__Clostridia	o__Clostridiales	f__Ruminococcaceae	g__Ruminococcaceae_UCG-011	s__uncultured_rumen_bacterium_g__Ruminococcaceae_UCG-011	OTU360	0	113	335	293	708	204	0	1	0	0	0	0	0	0	0	0	0	0	0	0	0	0	0	0	0	0	0	0	0	0	0	0	0	0	0	0	0	0	1654
d__Bacteria	k__norank	p__Firmicutes	c__Bacilli	o__Bacillales	f__Bacillaceae	g__Bacillus	s__unclassified_g__Bacillus	OTU2029	0	0	0	0	0	7	0	0	0	0	0	0	0	0	0	0	0	0	2	2	8	3	0	2	0	1	0	2	2	1	0	2	20	0	0	0	4	0	56
d__Bacteria	k__norank	p__TM6__Dependentiae_	c__norank_p__TM6__Dependentiae_	o__norank_p__TM6__Dependentiae_	f__norank_p__TM6__Dependentiae_	g__norank_p__TM6__Dependentiae_	s__uncultured_bacterium_g__norank_p__TM6__Dependentiae_	OTU1460	0	0	0	0	0	0	0	0	0	0	0	0	0	1	0	0	0	0	1	0	6	1	0	1	0	0	0	0	0	0	0	0	0	0	0	0	0	0	10
d__Bacteria	k__norank	p__Acidobacteria	c__Acidobacteria	o__norank_c__Acidobacteria	f__norank_c__Acidobacteria	g__norank_c__Acidobacteria	s__unclassified_g__norank_c__Acidobacteria	OTU1066	0	0	4	0	20	1	0	0	0	0	0	0	0	0	0	0	0	0	0	0	0	0	0	0	0	0	0	0	0	0	0	0	0	0	0	0	0	0	25
d__Bacteria	k__norank	p__Firmicutes	c__Bacilli	o__Lactobacillales	f__Lactobacillaceae	g__Lactobacillus	s__Lactobacillus_pobuzihii	OTU1393	0	0	0	0	0	0	0	0	0	0	84	131	0	0	0	0	0	0	0	0	0	0	0	0	0	0	0	0	0	0	0	0	0	0	0	0	0	0	215
d__Bacteria	k__norank	p__Firmicutes	c__Erysipelotrichia	o__Erysipelotrichales	f__Erysipelotrichaceae	g__norank_f__Erysipelotrichaceae	s__uncultured_rumen_bacterium_g__norank_f__Erysipelotrichaceae	OTU595	0	0	18	3	0	2	0	0	0	0	0	0	0	0	0	0	0	0	0	0	0	0	0	0	0	0	0	0	0	0	0	0	0	0	0	0	0	0	23
d__Bacteria	k__norank	p__Actinobacteria	c__Actinobacteria	o__Gaiellales	f__Gaiellaceae	g__Gaiella	s__Gaiella_occulta	OTU1538	0	0	7	0	0	0	0	0	0	0	0	0	0	0	0	0	0	0	11	6	24	10	14	8	8	10	3	2	0	0	0	0	0	0	0	0	0	0	103
d__Bacteria	k__norank	p__Proteobacteria	c__Gammaproteobacteria	o__Chromatiales	f__Chromatiaceae	g__unclassified_f__Chromatiaceae	s__unclassified_f__Chromatiaceae	OTU2046	12	0	9	0	1	2	110	835	0	0	7	0	0	1	0	0	0	0	0	0	0	0	0	0	0	0	0	0	27	48	3	7	89	0	0	0	0	0	1151
d__Bacteria	k__norank	p__Firmicutes	c__Erysipelotrichia	o__Erysipelotrichales	f__Erysipelotrichaceae	g__norank_f__Erysipelotrichaceae	s__uncultured_rumen_bacterium_g__norank_f__Erysipelotrichaceae	OTU352	0	0	22	5	7	6	0	0	0	0	0	0	0	0	0	0	0	0	0	0	0	0	0	0	0	0	0	0	0	0	0	0	0	0	0	0	0	0	40
d__Bacteria	k__norank	p__Firmicutes	c__Clostridia	o__Clostridiales	f__Lachnospiraceae	g__[Eubacterium]_rectale_group	s__unclassified_g__[Eubacterium]_rectale_group	OTU901	3	0	30	0	52	24	7	0	0	2	1	7	0	1	0	0	0	0	0	0	0	0	0	0	0	0	0	0	0	0	0	0	3	0	0	0	0	0	130
d__Bacteria	k__norank	p__Actinobacteria	c__Actinobacteria	o__Coriobacteriales	f__Coriobacteriaceae	g__norank_f__Coriobacteriaceae	s__unclassified_g__norank_f__Coriobacteriaceae	OTU1856	0	0	0	0	0	0	0	0	0	0	0	0	0	0	0	0	0	0	2	1	15	0	1	1	0	0	1	0	0	0	0	0	0	0	0	0	0	0	21
d__Bacteria	k__norank	p__Bacteroidetes	c__Bacteroidia	o__Bacteroidales	f__Prevotellaceae	g__Prevotellaceae_UCG-001	s__unclassified_g__Prevotellaceae_UCG-001	OTU652	0	0	0	8	0	0	0	0	0	0	0	0	0	0	0	0	0	0	0	0	0	0	0	0	0	0	0	0	0	0	0	0	0	0	0	0	0	0	8
d__Bacteria	k__norank	p__Spirochaetae	c__Spirochaetes	o__Spirochaetales	f__Spirochaetaceae	g__Spirochaeta_2	s__unclassified_g__Spirochaeta_2	OTU469	107	5	7	5	1	0	0	0	0	0	0	0	0	0	0	0	0	0	0	0	0	0	0	0	0	0	0	0	0	0	0	0	0	0	0	0	0	0	125
d__Bacteria	k__norank	p__Proteobacteria	c__Alphaproteobacteria	o__Sphingomonadales	f__Sphingomonadaceae	g__Novosphingobium	s__unclassified_g__Novosphingobium	OTU1361	9	5	5	3	0	0	272	57	4	21	38	0	0	4	0	0	0	0	0	0	0	0	1	0	0	0	0	0	4	5	0	0	7	0	0	0	0	0	435
d__Bacteria	k__norank	p__Bacteroidetes	c__Bacteroidia	o__Bacteroidales	f__Rikenellaceae	g__Rikenella	s__uncultured_bacterium_g__Rikenella	OTU273	0	0	18	0	0	0	0	0	0	0	0	0	0	0	0	1	1	1	0	0	0	0	0	0	0	0	0	0	0	0	0	0	0	0	0	0	0	0	21
d__Bacteria	k__norank	p__Firmicutes	c__Clostridia	o__Clostridiales	f__Lachnospiraceae	g__Epulopiscium	s__uncultured_bacterium_g__Epulopiscium	OTU1634	0	0	0	0	0	0	0	0	0	0	0	0	0	0	0	0	0	0	0	0	55	0	0	0	0	0	0	1	0	0	0	0	0	0	0	0	0	0	56
d__Bacteria	k__norank	p__Proteobacteria	c__Gammaproteobacteria	o__Chromatiales	f__Chromatiaceae	g__unclassified_f__Chromatiaceae	s__unclassified_f__Chromatiaceae	OTU1311	0	0	0	0	0	0	2	22	0	0	0	0	0	0	0	0	0	0	0	0	0	0	0	0	0	0	0	0	0	0	0	0	0	0	0	0	0	0	24
d__Bacteria	k__norank	p__Bacteroidetes	c__Bacteroidia	o__Bacteroidales	f__Prevotellaceae	g__Prevotellaceae_UCG-001	s__unclassified_g__Prevotellaceae_UCG-001	OTU780	0	0	0	0	21	0	0	0	0	0	0	0	0	0	0	0	0	0	0	0	0	0	0	0	0	0	0	0	0	0	0	0	0	0	0	0	0	0	21
d__Bacteria	k__norank	p__Actinobacteria	c__Actinobacteria	o__Propionibacteriales	f__Propionibacteriaceae	g__Microlunatus	s__unclassified_g__Microlunatus	OTU755	0	2	2	14	3	0	0	0	0	0	0	0	0	0	0	0	0	0	0	0	0	0	0	0	0	0	0	0	0	0	0	0	0	0	0	0	0	0	21
d__Bacteria	k__norank	p__Firmicutes	c__Clostridia	o__Clostridiales	f__Lachnospiraceae	g__norank_f__Lachnospiraceae	s__uncultured_rumen_bacterium_g__norank_f__Lachnospiraceae	OTU998	0	0	13	0	15	0	0	0	0	0	0	0	0	0	0	0	0	0	0	0	0	0	0	0	0	0	0	0	0	0	0	0	0	0	0	0	0	0	28
d__Bacteria	k__norank	p__Firmicutes	c__Clostridia	o__Clostridiales	f__Family_XIII	g__Family_XIII_AD3011_group	s__unclassified_g__Family_XIII_AD3011_group	OTU1034	0	0	2	20	59	10	0	0	0	0	0	0	0	0	0	0	0	0	0	0	0	0	0	0	0	0	0	0	0	0	0	0	0	0	0	0	0	0	91
d__Bacteria	k__norank	p__Proteobacteria	c__Deltaproteobacteria	o__Syntrophobacterales	f__Syntrophaceae	g__Desulfomonile	s__unclassified_g__Desulfomonile	OTU1624	0	0	0	0	0	0	0	0	0	0	0	0	0	0	0	0	0	0	2	1	10	0	4	1	0	1	0	0	0	0	0	1	0	0	0	0	0	0	20
d__Bacteria	k__norank	p__Bacteroidetes	c__Bacteroidia	o__Bacteroidales	f__Bacteroidales_S24-7_group	g__norank_f__Bacteroidales_S24-7_group	s__uncultured_bacterium_g__norank_f__Bacteroidales_S24-7_group	OTU580	0	0	14	0	0	0	0	0	0	0	0	0	0	0	0	0	0	0	0	0	0	0	0	0	0	0	0	0	0	0	0	0	0	0	0	0	0	0	14
d__Bacteria	k__norank	p__Actinobacteria	c__Actinobacteria	o__Propionibacteriales	f__Propionibacteriaceae	g__Aestuariimicrobium	s__unclassified_g__Aestuariimicrobium	OTU2086	0	0	0	0	0	0	0	0	0	0	0	0	0	0	0	0	0	0	0	0	0	0	0	0	0	0	0	0	0	0	0	0	7	0	0	0	0	0	7
d__Bacteria	k__norank	p__Bacteroidetes	c__Flavobacteriia	o__Flavobacteriales	f__Flavobacteriaceae	g__Chryseobacterium	s__unclassified_g__Chryseobacterium	OTU1023	4	0	0	0	8	0	0	0	0	0	0	0	0	0	0	0	0	0	0	0	0	0	0	0	0	0	0	0	0	0	0	0	0	0	0	0	0	0	12
d__Bacteria	k__norank	p__Proteobacteria	c__Gammaproteobacteria	o__Enterobacteriales	f__Enterobacteriaceae	g__Providencia	s__Providencia_alcalifaciens	OTU2068	0	0	0	0	0	0	0	2	0	0	0	0	0	0	0	0	0	0	0	0	0	0	0	0	0	0	0	0	14	4	4	311	6	0	0	0	1	0	342
d__Bacteria	k__norank	p__Actinobacteria	c__Actinobacteria	o__Solirubrobacterales	f__Parviterribacteraceae	g__Parviterribacter	s__uncultured_bacterium_g__Parviterribacter	OTU1296	0	0	0	0	0	0	5	0	0	0	0	0	0	0	0	0	0	0	1	1	0	0	1	0	1	0	0	0	1	0	0	0	1	0	0	0	0	0	11
d__Bacteria	k__norank	p__Bacteroidetes	c__Cytophagia	o__Cytophagales	f__Cytophagaceae	g__Arcicella	s__uncultured_bacterium_g__Arcicella	OTU735	0	0	0	10	0	6	0	0	0	0	1	0	0	0	0	0	0	0	0	0	0	0	0	0	0	0	0	0	0	0	0	0	0	0	0	0	0	0	17
d__Bacteria	k__norank	p__Bacteroidetes	c__Bacteroidia	o__Bacteroidales	f__Rikenellaceae	g__Rikenellaceae_RC9_gut_group	s__uncultured_bacterium_g__Rikenellaceae_RC9_gut_group	OTU1255	0	0	2	0	0	10	0	0	0	0	0	0	0	0	0	0	0	0	0	0	0	0	0	0	0	0	0	0	0	0	0	0	0	0	0	0	0	0	12
d__Bacteria	k__norank	p__Actinobacteria	c__Actinobacteria	o__Acidimicrobiales	f__Acidimicrobiaceae	g__Ilumatobacter	s__unclassified_g__Ilumatobacter	OTU1579	0	0	0	0	0	0	0	0	0	0	0	0	0	0	0	0	0	0	37	46	27	24	23	13	2	10	3	6	0	0	0	0	3	0	0	0	0	0	194
d__Bacteria	k__norank	p__Bacteroidetes	c__Bacteroidia	o__Bacteroidales	f__Porphyromonadaceae	g__Parabacteroides	s__unclassified_g__Parabacteroides	OTU690	0	0	0	5	0	0	0	0	0	0	0	0	0	0	0	0	0	0	0	0	0	0	0	0	0	0	0	0	0	0	0	0	0	0	0	0	0	0	5
d__Bacteria	k__norank	p__Bacteroidetes	c__Sphingobacteriia	o__Sphingobacteriales	f__Sphingobacteriaceae	g__Sphingobacterium	s__unclassified_g__Sphingobacterium	OTU1147	0	0	0	0	0	18	0	0	0	0	0	0	0	0	0	0	0	0	0	0	0	0	0	0	0	0	0	0	0	1	0	0	0	0	0	0	0	0	19
d__Bacteria	k__norank	p__Saccharibacteria	c__Unknown_Class_p__Saccharibacteria	o__Unknown_Order_c__Unknown_Class_p__Saccharibacteria	f__Unknown_Family_o__Unknown_Order_c__Unknown_Class_p__Saccharibacteria	g__Candidatus_Saccharimonas	s__uncultured_rumen_bacterium_g__Candidatus_Saccharimonas	OTU1062	0	0	0	0	18	0	0	0	0	0	0	0	0	0	0	0	0	0	0	0	0	0	0	0	0	0	0	0	0	0	0	0	0	0	0	0	0	0	18
d__Bacteria	k__norank	p__Verrucomicrobia	c__Opitutae	o__Opitutales	f__Opitutaceae	g__Opitutus	s__uncultured_Opitutus_sp._g__Opitutus	OTU533	0	0	15	0	0	0	0	0	0	0	0	0	0	0	0	0	0	0	0	0	0	0	0	0	0	0	0	0	0	0	0	0	0	0	0	0	0	0	15
d__Bacteria	k__norank	p__Bacteroidetes	c__Sphingobacteriia	o__Sphingobacteriales	f__norank_o__Sphingobacteriales	g__norank_o__Sphingobacteriales	s__uncultured_bacterium_g__norank_o__Sphingobacteriales	OTU62	17	0	0	0	0	0	0	0	0	0	0	0	0	0	0	0	0	0	0	0	0	0	0	0	0	0	0	0	0	0	0	0	0	0	0	0	0	0	17
d__Bacteria	k__norank	p__Bacteroidetes	c__Bacteroidia	o__Bacteroidales	f__Prevotellaceae	g__Prevotella	s__Prevotella_sp._310-5	OTU1209	0	0	0	0	0	18	0	0	0	0	0	0	0	0	0	0	0	0	0	0	0	0	0	0	0	0	0	0	0	0	0	0	0	0	0	0	0	0	18
d__Bacteria	k__norank	p__Bacteroidetes	c__Bacteroidia	o__Bacteroidales	f__Bacteroidales_S24-7_group	g__norank_f__Bacteroidales_S24-7_group	s__uncultured_bacterium_g__norank_f__Bacteroidales_S24-7_group	OTU453	0	0	41	0	0	0	0	0	0	0	0	0	0	0	0	0	0	0	0	1	0	0	0	0	0	0	0	0	0	0	0	0	0	0	0	0	0	0	42
d__Bacteria	k__norank	p__Bacteroidetes	c__Bacteroidia	o__Bacteroidales	f__Rikenellaceae	g__Anaerocella	s__unclassified_g__Anaerocella	OTU2120	0	0	0	0	0	3	0	1	0	0	0	0	0	0	0	0	0	0	0	0	0	0	0	0	0	0	0	0	2	2	0	1	99	0	0	0	0	0	108
d__Bacteria	k__norank	p__Firmicutes	c__Clostridia	o__Clostridiales	f__Christensenellaceae	g__Christensenellaceae_R-7_group	s__unclassified_g__Christensenellaceae_R-7_group	OTU990	0	2	3	35	42	11	0	0	0	0	0	0	0	0	0	0	0	0	0	0	0	0	0	0	0	0	0	0	0	0	0	0	0	0	0	0	0	0	93
d__Bacteria	k__norank	p__Bacteroidetes	c__unclassified_p__Bacteroidetes	o__unclassified_p__Bacteroidetes	f__unclassified_p__Bacteroidetes	g__unclassified_p__Bacteroidetes	s__unclassified_p__Bacteroidetes	OTU266	4	43	3	23	6	39	0	0	0	0	0	0	0	0	0	0	0	0	0	0	0	0	0	0	0	0	0	0	0	0	0	0	0	0	0	0	0	0	118
d__Bacteria	k__norank	p__Proteobacteria	c__Deltaproteobacteria	o__Desulfobacterales	f__Desulfobulbaceae	g__Desulfoprunum	s__uncultured_bacterium_g__Desulfoprunum	OTU1891	0	0	4	0	0	0	0	0	0	0	0	0	0	0	0	0	0	0	39	90	4	45	19	23	10	9	6	6	0	0	0	0	0	0	0	0	0	0	255
d__Bacteria	k__norank	p__Bacteroidetes	c__Bacteroidia	o__Bacteroidales	f__Prevotellaceae	g__Alloprevotella	s__gut_metagenome_g__Alloprevotella	OTU514	0	29	94	6	0	0	0	0	0	0	0	0	0	0	0	0	0	0	0	0	0	0	0	0	0	0	0	0	0	0	0	0	0	0	0	0	0	0	129
d__Bacteria	k__norank	p__Proteobacteria	c__Alphaproteobacteria	o__Rhizobiales	f__Bradyrhizobiaceae	g__Rhodopseudomonas	s__Rhodopseudomonas_pseudopalustris	OTU2143	0	28	27	0	0	9	25	9	0	8	6	0	0	2	0	0	0	0	0	1	19	1	3	0	0	1	0	1	5	8	0	1	252	0	0	0	3	0	409
d__Bacteria	k__norank	p__Proteobacteria	c__Gammaproteobacteria	o__unclassified_c__Gammaproteobacteria	f__unclassified_c__Gammaproteobacteria	g__unclassified_c__Gammaproteobacteria	s__unclassified_c__Gammaproteobacteria	OTU2033	0	0	3	0	1	0	0	0	0	0	1	0	0	0	0	0	0	0	0	0	7	0	0	0	0	0	0	0	1	0	0	0	1	0	0	0	0	0	14
d__Bacteria	k__norank	p__Bacteroidetes	c__Bacteroidia	o__Bacteroidales	f__Prevotellaceae	g__Prevotella_1	s__unclassified_g__Prevotella_1	OTU1004	0	0	14	0	8	0	0	0	0	0	0	0	0	0	0	0	0	0	0	0	0	0	0	0	0	0	0	0	0	0	0	0	0	0	0	0	0	0	22
d__Bacteria	k__norank	p__Bacteroidetes	c__Bacteroidia	o__Bacteroidales	f__Prevotellaceae	g__Prevotella_1	s__uncultured_bacterium_g__Prevotella_1	OTU1006	0	0	1	0	20	2	0	0	0	0	0	0	0	0	0	0	0	0	0	0	0	0	0	0	0	0	0	0	0	0	0	0	0	0	0	0	0	0	23
d__Bacteria	k__norank	p__Proteobacteria	c__Betaproteobacteria	o__Burkholderiales	f__Alcaligenaceae	g__Sutterella	s__unclassified_g__Sutterella	OTU503	0	0	10	0	0	0	0	0	0	0	0	0	0	0	0	0	0	0	0	0	0	0	0	0	0	0	0	0	0	0	0	0	0	0	0	0	0	0	10
d__Bacteria	k__norank	p__Bacteroidetes	c__Bacteroidia	o__Bacteroidales	f__Prevotellaceae	g__Prevotellaceae_NK3B31_group	s__uncultured_rumen_bacterium_g__Prevotellaceae_NK3B31_group	OTU746	0	0	0	25	0	5	0	0	0	0	0	0	0	0	0	0	0	0	0	0	0	0	0	0	0	0	0	0	0	0	0	0	0	0	0	0	0	0	30
d__Bacteria	k__norank	p__Firmicutes	c__Clostridia	o__Clostridiales	f__Lachnospiraceae	g__Lachnospiraceae_NK3A20_group	s__uncultured_rumen_bacterium_g__Lachnospiraceae_NK3A20_group	OTU1103	0	0	7	16	0	14	0	0	0	0	0	0	0	0	0	0	0	0	0	0	0	0	0	0	0	0	0	0	0	0	0	0	0	0	0	0	0	0	37
d__Bacteria	k__norank	p__Bacteroidetes	c__Flavobacteriia	o__Flavobacteriales	f__Flavobacteriaceae	g__Chryseobacterium	s__uncultured_bacterium_g__Chryseobacterium	OTU718	129	98	35	67	9	126	7	0	0	0	7	0	0	0	0	0	0	0	0	0	0	0	0	0	0	0	0	0	0	0	0	0	0	0	0	0	0	0	478
d__Bacteria	k__norank	p__Proteobacteria	c__Deltaproteobacteria	o__Syntrophobacterales	f__Syntrophobacteraceae	g__Syntrophobacter	s__Syntrophobacter_fumaroxidans_MPOB	OTU2147	0	0	0	0	0	0	0	0	0	0	0	0	0	0	0	0	0	0	0	0	0	0	0	0	0	0	0	0	0	0	0	0	3	0	0	0	0	0	3
d__Bacteria	k__norank	p__Actinobacteria	c__Actinobacteria	o__unclassified_c__Actinobacteria	f__unclassified_c__Actinobacteria	g__unclassified_c__Actinobacteria	s__unclassified_c__Actinobacteria	OTU1319	0	0	0	0	0	0	0	4	0	0	0	0	0	0	0	0	0	0	0	0	0	0	0	0	0	0	0	0	0	1	0	0	6	0	0	0	0	0	11
d__Bacteria	k__norank	p__Bacteroidetes	c__Bacteroidia	o__Bacteroidales	f__Bacteroidales_S24-7_group	g__norank_f__Bacteroidales_S24-7_group	s__uncultured_bacterium_g__norank_f__Bacteroidales_S24-7_group	OTU324	0	0	15	0	14	0	0	0	0	0	0	0	0	0	0	0	0	0	0	0	0	0	0	0	0	0	0	0	0	0	0	0	0	0	0	0	0	0	29
d__Bacteria	k__norank	p__Proteobacteria	c__Betaproteobacteria	o__Burkholderiales	f__Comamonadaceae	g__Aquabacterium	s__uncultured_beta_proteobacterium_g__Aquabacterium	OTU158	12	0	0	0	25	0	19	1	0	0	1	0	0	0	0	0	0	0	0	0	2	0	0	0	0	0	0	0	0	0	0	0	2	0	0	0	3	1	66
d__Bacteria	k__norank	p__Chloroflexi	c__Anaerolineae	o__Anaerolineales	f__Anaerolineaceae	g__norank_f__Anaerolineaceae	s__unclassified_g__norank_f__Anaerolineaceae	OTU2056	0	0	0	0	0	0	0	0	0	0	0	0	0	0	0	0	0	0	0	0	0	0	0	0	0	0	0	0	0	3	0	1	3	0	0	0	0	0	7
d__Bacteria	k__norank	p__Chloroflexi	c__Anaerolineae	o__Anaerolineales	f__Anaerolineaceae	g__norank_f__Anaerolineaceae	s__unclassified_g__norank_f__Anaerolineaceae	OTU2057	0	0	0	0	0	0	0	6	0	0	0	0	0	0	0	0	0	0	38	41	18	12	13	9	4	7	4	14	40	66	2	26	277	0	0	0	0	0	577
d__Bacteria	k__norank	p__Proteobacteria	c__Betaproteobacteria	o__Neisseriales	f__Neisseriaceae	g__Leeia	s__uncultured_bacterium_g__Leeia	OTU1321	0	0	0	0	0	0	0	19	0	1	3	0	0	2	0	0	0	0	0	0	0	0	0	0	0	0	0	0	2	0	0	0	0	0	0	0	0	0	27
d__Bacteria	k__norank	p__Actinobacteria	c__Actinobacteria	o__Coriobacteriales	f__Coriobacteriaceae	g__norank_f__Coriobacteriaceae	s__uncultured_soil_bacterium_g__norank_f__Coriobacteriaceae	OTU1859	0	0	1	0	0	3	0	0	0	0	0	0	0	0	0	0	0	0	88	86	153	31	46	30	21	40	5	14	0	1	0	0	0	0	0	0	0	0	519
d__Bacteria	k__norank	p__Proteobacteria	c__Betaproteobacteria	o__Burkholderiales	f__Comamonadaceae	g__Paucibacter	s__unclassified_g__Paucibacter	OTU135	18	0	0	14	0	0	0	0	0	0	0	0	0	0	0	0	0	0	0	3	1	0	0	0	0	0	0	0	0	0	0	0	0	0	0	0	0	0	36
d__Bacteria	k__norank	p__Proteobacteria	c__Alphaproteobacteria	o__Rhizobiales	f__Methylobacteriaceae	g__Meganema	s__uncultured_bacterium_g__Meganema	OTU2112	0	0	2	2	6	1	0	4	2	0	0	0	0	2	0	0	0	0	0	1	5	0	0	0	0	0	0	0	2	6	0	0	65	0	0	0	0	0	98
d__Bacteria	k__norank	p__Proteobacteria	c__Gammaproteobacteria	o__Xanthomonadales	f__Xanthomonadales_Incertae_Sedis	g__norank_f__Xanthomonadales_Incertae_Sedis	s__unclassified_g__norank_f__Xanthomonadales_Incertae_Sedis	OTU18	8	0	1	0	0	0	0	0	0	0	0	0	0	0	0	0	0	0	0	0	0	0	0	0	0	0	0	0	0	0	0	0	0	0	0	0	0	0	9
d__Bacteria	k__norank	p__Chloroflexi	c__Anaerolineae	o__Anaerolineales	f__Anaerolineaceae	g__norank_f__Anaerolineaceae	s__unclassified_g__norank_f__Anaerolineaceae	OTU1488	7	0	0	0	0	0	0	0	0	0	0	0	0	0	0	0	0	0	10	24	16	4	5	3	1	1	0	3	0	0	0	0	1	0	0	0	0	0	75
d__Bacteria	k__norank	p__Firmicutes	c__Clostridia	o__Clostridiales	f__Ruminococcaceae	g__Ruminococcaceae_UCG-014	s__uncultured_rumen_bacterium_g__Ruminococcaceae_UCG-014	OTU839	0	0	0	8	5	2	0	0	0	0	0	0	0	0	0	0	0	0	0	0	0	0	0	0	0	0	0	0	0	0	0	0	0	0	0	0	0	0	15
d__Bacteria	k__norank	p__Chloroflexi	c__Anaerolineae	o__Anaerolineales	f__Anaerolineaceae	g__norank_f__Anaerolineaceae	s__uncultured_Gemmatimonadetes_bacterium_g__norank_f__Anaerolineaceae	OTU1657	0	0	0	0	0	0	0	0	0	0	0	0	0	0	0	0	0	0	0	0	6	0	0	0	0	0	0	0	0	0	0	0	0	0	0	0	0	0	6
d__Bacteria	k__norank	p__Bacteroidetes	c__Flavobacteriia	o__Flavobacteriales	f__Flavobacteriaceae	g__Cloacibacterium	s__unclassified_g__Cloacibacterium	OTU86	675	22	2	174	7	44	0	1	0	0	0	0	0	0	0	0	0	0	0	0	0	0	0	0	0	0	0	0	4	1	0	0	4	0	0	0	0	0	934
d__Bacteria	k__norank	p__Fibrobacteres	c__Fibrobacteria	o__Fibrobacterales	f__Fibrobacteraceae	g__Fibrobacter	s__unclassified_g__Fibrobacter	OTU188	0	4	13	0	64	2	0	0	0	0	0	0	0	0	0	0	0	0	0	0	0	0	0	0	0	0	0	0	0	0	0	0	0	0	0	0	0	0	83
d__Bacteria	k__norank	p__Chloroflexi	c__Thermomicrobia	o__JG30-KF-CM45	f__norank_o__JG30-KF-CM45	g__norank_o__JG30-KF-CM45	s__uncultured_Chloroflexi_bacterium_g__norank_o__JG30-KF-CM45	OTU1473	0	0	0	0	0	0	0	0	0	0	0	0	0	0	0	0	0	0	1	1	1	3	0	1	0	0	0	0	0	0	0	0	0	0	0	0	0	0	7
d__Bacteria	k__norank	p__Saccharibacteria	c__norank_p__Saccharibacteria	o__norank_p__Saccharibacteria	f__norank_p__Saccharibacteria	g__norank_p__Saccharibacteria	s__unclassified_g__norank_p__Saccharibacteria	OTU223	0	9	0	0	0	0	0	0	0	0	0	0	0	0	0	0	0	0	0	4	4	0	0	0	0	0	0	0	0	0	0	0	0	0	0	0	0	0	17
d__Bacteria	k__norank	p__Elusimicrobia	c__Elusimicrobia	o__Lineage_I	f__Unknown_Family_o__Lineage_I	g__Candidatus_Endomicrobium	s__uncultured_rumen_bacterium_g__Candidatus_Endomicrobium	OTU871	0	0	0	12	29	0	0	0	0	0	0	0	0	0	0	0	0	0	0	0	0	0	0	0	0	0	0	0	0	0	0	0	0	0	0	0	0	0	41
d__Bacteria	k__norank	p__Bacteroidetes	c__Bacteroidia	o__Bacteroidales	f__Rikenellaceae	g__Rikenellaceae_RC9_gut_group	s__unclassified_g__Rikenellaceae_RC9_gut_group	OTU1172	0	0	23	53	114	47	0	0	0	0	0	0	0	0	0	0	0	0	0	0	0	0	0	0	0	0	0	0	0	0	0	0	0	0	0	0	0	0	237
d__Bacteria	k__norank	p__Firmicutes	c__Negativicutes	o__Selenomonadales	f__Acidaminococcaceae	g__Succiniclasticum	s__unclassified_g__Succiniclasticum	OTU1083	0	3	0	23	65	49	0	0	0	0	0	0	0	0	0	0	0	0	0	0	0	0	0	0	0	0	0	0	0	0	0	0	0	0	0	0	0	0	140
d__Bacteria	k__norank	p__Deinococcus-Thermus	c__Deinococci	o__Deinococcales	f__Deinococcaceae	g__Deinococcus	s__Deinococcus_antarcticus	OTU184	0	8	0	0	0	0	0	0	0	0	0	0	0	0	0	0	0	0	0	0	0	0	0	0	0	0	0	0	0	0	0	0	0	0	0	0	0	0	8
d__Bacteria	k__norank	p__Proteobacteria	c__Betaproteobacteria	o__SC-I-84	f__norank_o__SC-I-84	g__norank_o__SC-I-84	s__unclassified_g__norank_o__SC-I-84	OTU880	0	0	0	0	7	0	0	0	0	0	0	0	0	0	0	0	0	0	0	0	0	0	0	0	0	0	0	0	0	0	0	0	0	0	0	0	0	0	7
d__Bacteria	k__norank	p__Actinobacteria	c__Actinobacteria	o__Corynebacteriales	f__Corynebacteriaceae	g__Corynebacterium_1	s__Corynebacterium_tuberculostearicum	OTU983	1	7	3	1	15	3	8	0	0	1	1	0	0	0	0	0	0	0	0	0	0	0	0	0	0	0	0	0	0	0	0	0	0	0	1	1	1	0	43
d__Bacteria	k__norank	p__Proteobacteria	c__Alphaproteobacteria	o__Sphingomonadales	f__Sphingomonadaceae	g__Sphingomonas	s__Sphingomonas_aerolata	OTU1202	0	12	0	4	0	22	26	0	0	0	0	0	0	1	0	0	0	0	0	0	0	0	0	0	0	0	0	0	0	1	0	0	2	0	0	0	0	0	68
d__Bacteria	k__norank	p__Proteobacteria	c__Alphaproteobacteria	o__Rhizobiales	f__Aurantimonadaceae	g__Aureimonas	s__Aureimonas_altamirensis	OTU1280	0	2	0	0	0	0	6	4	0	0	5	0	0	0	0	0	0	0	0	0	0	0	0	1	0	0	0	0	0	2	0	0	1	0	0	0	0	0	21
d__Bacteria	k__norank	p__Bacteroidetes	c__Bacteroidia	o__Bacteroidales	f__Rikenellaceae	g__Rikenellaceae_RC9_gut_group	s__unclassified_g__Rikenellaceae_RC9_gut_group	OTU222	0	20	0	13	22	3	0	0	0	0	0	0	0	0	0	0	0	0	0	0	0	0	0	0	0	0	0	0	0	0	0	0	0	0	0	0	0	0	58
d__Bacteria	k__norank	p__Firmicutes	c__Clostridia	o__Clostridiales	f__Lachnospiraceae	g__unclassified_f__Lachnospiraceae	s__unclassified_f__Lachnospiraceae	OTU445	0	0	21	0	0	0	0	0	0	0	0	0	0	0	0	0	0	0	0	0	0	0	0	0	0	0	0	0	0	0	0	0	0	0	1	0	0	0	22
d__Bacteria	k__norank	p__Gemmatimonadetes	c__Gemmatimonadetes	o__Gemmatimonadales	f__Gemmatimonadaceae	g__norank_f__Gemmatimonadaceae	s__uncultured_Gemmatimonadetes_bacterium_g__norank_f__Gemmatimonadaceae	OTU617	0	0	7	0	0	0	0	0	0	0	0	0	0	0	0	0	0	0	0	0	0	0	0	0	0	0	0	0	0	0	0	0	0	0	0	0	0	0	7
d__Bacteria	k__norank	p__Armatimonadetes	c__Armatimonadia	o__Armatimonadales	f__norank_o__Armatimonadales	g__norank_o__Armatimonadales	s__uncultured_soil_bacterium_g__norank_o__Armatimonadales	OTU2	12	0	0	0	0	0	0	0	0	0	0	0	0	0	0	0	0	0	0	0	0	0	0	0	0	0	0	0	0	0	0	0	0	0	0	0	0	0	12
d__Bacteria	k__norank	p__Bacteroidetes	c__Bacteroidia	o__Bacteroidales	f__norank_o__Bacteroidales	g__norank_o__Bacteroidales	s__uncultured_rumen_bacterium_g__norank_o__Bacteroidales	OTU1163	0	0	0	0	2	12	0	0	0	0	0	0	0	0	0	0	0	0	0	0	0	0	0	0	0	0	0	0	0	0	0	0	0	0	0	0	0	0	14
d__Bacteria	k__norank	p__Firmicutes	c__Clostridia	o__Clostridiales	f__Family_XII_o__Clostridiales	g__Fusibacter	s__unclassified_g__Fusibacter	OTU1125	0	0	0	0	1	446	0	0	0	0	0	0	0	0	0	0	0	0	0	0	0	0	0	0	0	0	0	0	0	0	0	0	0	0	0	0	0	0	447
d__Bacteria	k__norank	p__Proteobacteria	c__Betaproteobacteria	o__Burkholderiales	f__Comamonadaceae	g__unclassified_f__Comamonadaceae	s__unclassified_f__Comamonadaceae	OTU31	41	6	0	13	0	3	22	7	0	16	17	0	0	0	0	0	0	0	0	0	0	0	0	0	0	0	0	0	0	0	0	0	0	0	0	0	0	0	125
d__Bacteria	k__norank	p__Proteobacteria	c__Gammaproteobacteria	o__Legionellales	f__Legionellaceae	g__Legionella	s__Legionella_feeleii	OTU2051	0	0	0	0	0	0	0	0	4	0	0	0	1	13	0	0	0	0	0	0	0	0	0	0	0	0	0	0	11	32	1	3	135	0	0	0	0	0	200
d__Bacteria	k__norank	p__Spirochaetae	c__Spirochaetes	o__Spirochaetales	f__Leptospiraceae	g__Leptonema	s__Leptonema_illini	OTU1309	0	0	0	0	0	0	0	9	0	0	0	1	0	0	0	0	0	0	0	0	0	0	0	0	0	0	0	0	0	0	0	0	0	0	0	0	0	0	10
d__Bacteria	k__norank	p__Proteobacteria	c__Betaproteobacteria	o__TRA3-20	f__norank_o__TRA3-20	g__norank_o__TRA3-20	s__uncultured_Nitrosomonadales_bacterium_g__norank_o__TRA3-20	OTU385	0	0	11	0	0	0	0	0	0	0	0	0	0	0	0	0	0	0	0	0	0	0	0	0	0	0	0	0	0	0	0	0	0	0	0	0	0	0	11
d__Bacteria	k__norank	p__Proteobacteria	c__Alphaproteobacteria	o__Rhizobiales	f__Bradyrhizobiaceae	g__Bosea	s__uncultured_organism_g__Bosea	OTU723	9	48	34	27	19	8	6	17	0	5	8	0	0	36	0	0	0	0	1	0	0	0	0	1	0	0	0	0	4	17	0	4	110	0	0	0	0	0	354
d__Bacteria	k__norank	p__Actinobacteria	c__Actinobacteria	o__Gaiellales	f__norank_o__Gaiellales	g__norank_o__Gaiellales	s__unidentified_marine_bacterioplankton_g__norank	OTU55	10	0	0	0	0	0	7	0	0	0	0	0	0	0	0	0	0	0	11	20	34	14	8	3	7	7	4	10	0	0	0	0	0	0	0	0	0	0	135
d__Bacteria	k__norank	p__Bacteroidetes	c__Flavobacteriia	o__Flavobacteriales	f__Flavobacteriaceae	g__Flavobacterium	s__Flavobacterium_succinicans	OTU1882	4	0	0	30	12	2	0	0	0	0	0	0	0	0	0	0	0	0	3	79	1	61	18	15	109	161	56	9	0	1	0	0	2	0	0	0	0	0	563
d__Bacteria	k__norank	p__Parcubacteria	c__Candidatus_Falkowbacteria	o__norank_c__Candidatus_Falkowbacteria	f__norank_c__Candidatus_Falkowbacteria	g__norank_c__Candidatus_Falkowbacteria	s__uncultured_bacterium_g__norank_c__Candidatus_Falkowbacteria	OTU994	0	0	0	0	40	0	0	0	0	0	0	0	0	0	0	0	0	0	0	0	0	0	0	0	0	0	0	0	0	0	0	0	0	0	0	0	0	0	40
d__Bacteria	k__norank	p__Proteobacteria	c__Alphaproteobacteria	o__Caulobacterales	f__Caulobacteraceae	g__unclassified_f__Caulobacteraceae	s__unclassified_f__Caulobacteraceae	OTU140	21	0	0	0	0	0	0	0	0	0	0	0	0	0	0	0	0	0	0	0	0	0	1	0	0	0	0	0	0	0	0	0	0	0	0	0	0	0	22
d__Bacteria	k__norank	p__Firmicutes	c__Bacilli	o__Lactobacillales	f__Streptococcaceae	g__Lactococcus	s__unclassified_g__Lactococcus	OTU1405	263	1624	526	2062	1292	3030	7470	10781	20482	74	1367	0	10857	17148	3464	0	0	0	0	0	0	0	0	0	0	0	0	0	4	336	76	13	44	0	0	0	0	0	80913
d__Bacteria	k__norank	p__Firmicutes	c__Clostridia	o__Clostridiales	f__Clostridiaceae_1	g__Clostridium_sensu_stricto_1	s__unclassified_g__Clostridium_sensu_stricto_1	OTU1418	32	5	0	0	12	2	9	5	2647	12477	16616	1317	17482	7531	32888	702	42	278	5	8	5274	6	26	0	3	4	4	3	849	973	42	5164	421	110	6779	1375	19517	2909	135517
d__Bacteria	k__norank	p__Firmicutes	c__Bacilli	o__Lactobacillales	f__Streptococcaceae	g__Lactococcus	s__unclassified_g__Lactococcus	OTU1406	65	206	241	142	142	103	7233	6413	8812	2479	1826	0	8724	5263	2360	0	0	0	0	0	0	0	0	0	0	0	0	0	136	575	19	27	1013	0	0	0	0	0	45779
d__Bacteria	k__norank	p__Bacteroidetes	c__Bacteroidia	o__Bacteroidales	f__Prevotellaceae	g__Prevotellaceae_UCG-001	s__unclassified_g__Prevotellaceae_UCG-001	OTU202	0	1	5	2	22	0	0	0	0	0	0	0	0	0	0	0	0	1	0	0	0	0	0	0	0	0	0	0	0	0	0	0	0	0	0	0	2	0	33
d__Bacteria	k__norank	p__Firmicutes	c__Bacilli	o__Lactobacillales	f__Streptococcaceae	g__Lactococcus	s__unclassified_g__Lactococcus	OTU1403	0	0	1	0	0	0	1	1	6	0	8	0	39	1	73	0	0	0	0	0	0	0	0	0	0	0	0	0	0	2	0	0	0	0	0	0	0	0	132
d__Bacteria	k__norank	p__Bacteroidetes	c__Flavobacteriia	o__Flavobacteriales	f__Flavobacteriaceae	g__Capnocytophaga	s__unclassified_g__Capnocytophaga	OTU1188	0	0	0	0	0	45	0	0	0	0	0	0	0	0	0	0	0	0	0	0	0	0	0	0	0	0	0	0	0	0	0	0	0	0	0	0	0	0	45
d__Bacteria	k__norank	p__Bacteroidetes	c__Bacteroidia	o__Bacteroidales	f__Prevotellaceae	g__Prevotellaceae_UCG-003	s__uncultured_rumen_bacterium_g__Prevotellaceae_UCG-003	OTU1035	0	0	4	13	13	0	0	0	0	0	0	0	0	0	0	0	0	0	0	0	0	0	0	0	0	0	0	0	0	0	0	0	0	0	0	0	0	0	30
d__Bacteria	k__norank	p__Lentisphaerae	c__Oligosphaeria	o__Oligosphaerales	f__Oligosphaeraceae	g__horsej-a03	s__unclassified_g__horsej-a03	OTU932	0	0	29	6	71	7	0	0	0	0	0	0	0	0	0	0	0	0	0	0	0	0	0	0	0	0	0	0	0	0	0	0	0	0	0	0	0	0	113
d__Bacteria	k__norank	p__Proteobacteria	c__Gammaproteobacteria	o__Alteromonadales	f__Alteromonadaceae	g__Alteromonas	s__unclassified_g__Alteromonas	OTU818	0	0	0	0	19	0	0	0	0	0	0	0	0	0	0	0	0	0	0	0	0	0	0	0	0	0	0	0	0	0	0	0	0	0	0	0	0	0	19
d__Bacteria	k__norank	p__Proteobacteria	c__Deltaproteobacteria	o__Desulfurellales	f__Desulfurellaceae	g__H16	s__delta_proteobacterium_WX152	OTU448	0	1	6	0	0	0	0	0	0	0	0	0	0	1	0	0	0	0	1	3	4	5	5	4	0	1	1	1	0	0	0	0	5	0	0	0	0	0	38
d__Bacteria	k__norank	p__Proteobacteria	c__Betaproteobacteria	o__Nitrosomonadales	f__Nitrosomonadaceae	g__norank_f__Nitrosomonadaceae	s__unclassified_g__norank_f__Nitrosomonadaceae	OTU1523	0	18	0	0	0	1	0	0	0	0	0	0	0	0	0	0	0	0	7	20	42	21	23	0	15	3	5	3	0	0	0	0	0	0	0	0	0	0	158
d__Bacteria	k__norank	p__Bacteroidetes	c__Sphingobacteriia	o__Sphingobacteriales	f__Chitinophagaceae	g__Parasegetibacter	s__uncultured_Bacteroidetes_bacterium_g__Parasegetibacter	OTU65	8	0	0	0	0	0	0	0	0	0	0	0	0	0	0	0	0	0	0	0	0	0	0	0	0	0	0	0	0	0	0	0	0	0	0	0	0	0	8
d__Bacteria	k__norank	p__Chlamydiae	c__Chlamydiae	o__Chlamydiales	f__Parachlamydiaceae	g__Candidatus_Protochlamydia	s__Chlamydia_sp._Diamant	OTU725	0	7	3	6	0	0	0	4	0	0	0	0	1	1	0	0	0	0	0	0	0	0	0	0	0	0	0	0	0	0	0	0	0	0	0	0	0	0	22
d__Bacteria	k__norank	p__Tenericutes	c__Mollicutes	o__Mollicutes_RF9	f__norank_o__Mollicutes_RF9	g__norank_o__Mollicutes_RF9	s__uncultured_bacterium_g__norank_o__Mollicutes_RF9	OTU988	0	0	0	0	11	0	0	0	0	0	0	0	0	0	0	0	0	0	0	0	0	0	0	0	0	0	0	0	0	0	0	0	0	0	0	0	0	0	11
d__Bacteria	k__norank	p__Nitrospirae	c__Nitrospira	o__norank_c__Nitrospira	f__norank_c__Nitrospira	g__Nitrospira	s__unclassified_g__Nitrospira	OTU1576	0	0	0	0	0	0	0	0	0	0	0	0	0	0	0	0	0	0	0	0	6	0	1	0	0	0	0	0	0	0	0	0	0	0	0	0	0	0	7
d__Bacteria	k__norank	p__Bacteroidetes	c__Bacteroidia	o__Bacteroidales	f__Bacteroidales_BS11_gut_group	g__norank_f__Bacteroidales_BS11_gut_group	s__uncultured_bacterium_g__norank_f__Bacteroidales_BS11_gut_group	OTU949	0	7	33	50	201	40	0	0	0	0	0	0	0	0	0	0	0	0	0	0	0	0	0	0	0	0	0	0	0	0	0	0	0	0	0	0	0	0	331
d__Bacteria	k__norank	p__Verrucomicrobia	c__Spartobacteria	o__Chthoniobacterales	f__DA101_soil_group	g__norank_f__DA101_soil_group	s__unclassified_g__norank_f__DA101_soil_group	OTU875	0	0	0	0	4	0	0	0	0	0	0	0	0	0	0	0	0	0	0	0	0	0	0	0	0	0	0	0	0	0	0	0	0	0	0	0	0	0	4
d__Bacteria	k__norank	p__Bacteroidetes	c__Bacteroidia	o__Bacteroidales	f__Rikenellaceae	g__Rikenellaceae_RC9_gut_group	s__uncultured_rumen_bacterium_g__Rikenellaceae_RC9_gut_group	OTU909	0	0	7	0	10	0	0	0	0	0	0	0	0	0	0	0	0	0	0	0	0	0	0	0	0	0	0	0	0	0	0	0	0	0	0	0	0	0	17
d__Bacteria	k__norank	p__Firmicutes	c__Clostridia	o__Clostridiales	f__Christensenellaceae	g__Christensenellaceae_R-7_group	s__unclassified_g__Christensenellaceae_R-7_group	OTU647	0	0	8	12	32	6	0	0	0	0	0	0	0	0	0	0	0	0	0	0	0	0	0	0	0	0	0	0	0	0	0	0	0	0	0	0	0	0	58
d__Bacteria	k__norank	p__Acidobacteria	c__Acidobacteria	o__Subgroup_23	f__norank_o__Subgroup_23	g__norank_o__Subgroup_23	s__unclassified_g__norank_o__Subgroup_23	OTU1536	0	0	0	0	0	0	0	0	0	0	0	0	0	0	0	0	0	0	0	2	0	1	0	0	0	0	1	0	0	0	0	0	0	0	0	0	0	0	4
d__Bacteria	k__norank	p__Bacteroidetes	c__Bacteroidia	o__Bacteroidales	f__Prevotellaceae	g__Prevotellaceae_UCG-003	s__uncultured_rumen_bacterium_g__Prevotellaceae_UCG-003	OTU613	0	27	67	25	119	36	0	0	0	0	0	0	0	0	0	0	0	0	0	0	0	0	0	0	0	0	0	0	0	0	0	0	0	0	0	0	0	0	274
d__Bacteria	k__norank	p__Firmicutes	c__Clostridia	o__Clostridiales	f__Ruminococcaceae	g__Anaerotruncus	s__uncultured_rumen_bacterium_g__Anaerotruncus	OTU931	0	0	0	0	19	0	0	0	0	0	0	0	0	0	0	0	0	0	0	0	0	0	0	0	0	0	0	0	0	0	0	0	0	0	0	0	0	0	19
d__Bacteria	k__norank	p__Bacteroidetes	c__Bacteroidetes_vadinHA17	o__norank_c__Bacteroidetes_vadinHA17	f__norank_c__Bacteroidetes_vadinHA17	g__norank_c__Bacteroidetes_vadinHA17	s__uncultured_Prolixibacter_sp._g__norank	OTU72	20	0	0	0	20	0	0	0	0	0	0	0	0	0	0	0	0	0	0	0	0	0	0	0	0	0	0	0	0	0	0	0	0	0	0	0	0	0	40
d__Bacteria	k__norank	p__Cyanobacteria	c__Cyanobacteria	o__norank_c__Cyanobacteria	f__norank_c__Cyanobacteria	g__norank_c__Cyanobacteria	s__Discoplastis_adunca	OTU1843	0	0	0	0	0	0	0	0	0	0	0	0	0	0	0	0	0	0	0	1	0	1	2	2	0	0	0	0	1	1	0	0	0	0	0	0	0	0	8
d__Bacteria	k__norank	p__Bacteroidetes	c__Bacteroidia	o__Bacteroidales	f__Bacteroidales_BS11_gut_group	g__norank_f__Bacteroidales_BS11_gut_group	s__uncultured_rumen_bacterium_g__norank_f__Bacteroidales_BS11_gut_group	OTU913	0	0	0	9	47	14	0	0	0	0	0	0	0	0	0	0	0	0	0	0	0	0	0	0	0	0	0	0	0	0	0	0	0	0	0	0	0	0	70
d__Bacteria	k__norank	p__Proteobacteria	c__Alphaproteobacteria	o__Rhizobiales	f__Hyphomicrobiaceae	g__Devosia	s__uncultured_soil_bacterium_g__Devosia	OTU1297	7	0	0	2	0	1	27	17	0	0	2	0	0	11	0	0	0	0	0	0	1	0	0	1	0	0	0	0	0	0	0	2	12	0	0	0	1	0	84
d__Bacteria	k__norank	p__Proteobacteria	c__Gammaproteobacteria	o__Aeromonadales	f__Aeromonadaceae	g__Aeromonas	s__unclassified_g__Aeromonas	OTU1905	110	29	14	44	3	30	4	3	0	3	0	2	4	11	3	42	5603	1	9	293	114	1511	604	677	1118	2318	1137	72	200	299	229	4	261	0	0	1	6	0	14759
d__Bacteria	k__norank	p__Verrucomicrobia	c__Verrucomicrobiae	o__Verrucomicrobiales	f__DEV007	g__norank_f__DEV007	s__unclassified_g__norank_f__DEV007	OTU1675	0	0	0	0	0	0	0	0	0	0	0	0	0	0	0	0	0	0	4	3	3	0	0	1	0	1	0	0	0	0	0	0	0	0	0	0	0	0	12
d__Bacteria	k__norank	p__Firmicutes	c__Erysipelotrichia	o__Erysipelotrichales	f__Erysipelotrichaceae	g__Solobacterium	s__unclassified_g__Solobacterium	OTU556	0	0	23	0	16	22	0	0	0	0	0	0	0	0	0	0	0	0	0	0	0	0	0	0	0	0	0	0	0	0	0	0	0	0	0	0	0	0	61
d__Bacteria	k__norank	p__Bacteroidetes	c__Bacteroidia	o__Bacteroidales	f__Prevotellaceae	g__Alloprevotella	s__uncultured_Bacteroidales_bacterium_g__Alloprevotella	OTU297	0	0	17	0	0	0	0	0	0	0	0	0	0	0	0	0	0	0	0	0	0	0	0	0	0	0	0	0	0	0	0	0	0	0	0	0	0	0	17
d__Bacteria	k__norank	p__Chloroflexi	c__Thermomicrobia	o__JG30-KF-CM45	f__norank_o__JG30-KF-CM45	g__norank_o__JG30-KF-CM45	s__uncultured_bacterium_g__norank_o__JG30-KF-CM45	OTU1276	0	0	0	0	0	0	1	0	0	0	1	0	0	0	0	0	0	0	0	0	0	0	0	0	0	0	0	0	1	9	1	1	23	0	0	0	0	0	37
d__Bacteria	k__norank	p__Proteobacteria	c__Deltaproteobacteria	o__Desulfurellales	f__Desulfurellaceae	g__H16	s__unclassified_g__H16	OTU1672	0	0	0	0	0	0	0	0	0	0	0	0	0	0	0	0	0	0	2	4	7	2	0	4	0	5	2	1	0	0	0	0	2	0	0	0	0	0	29
d__Bacteria	k__norank	p__WS6	c__norank_p__WS6	o__norank_p__WS6	f__norank_p__WS6	g__norank_p__WS6	s__uncultured_eubacterium_WCHB1-06	OTU696	4	0	0	17	0	0	0	0	0	0	0	0	0	0	0	0	0	0	0	0	0	0	0	0	0	0	0	0	0	0	0	0	0	0	0	0	0	0	21
d__Bacteria	k__norank	p__Firmicutes	c__Clostridia	o__Clostridiales	f__Ruminococcaceae	g__Ruminococcaceae_UCG-014	s__unclassified_g__Ruminococcaceae_UCG-014	OTU177	0	20	0	0	0	0	0	0	0	0	0	0	0	0	0	0	0	0	0	0	0	0	0	0	0	0	0	0	0	0	0	0	0	0	0	0	0	0	20
d__Bacteria	k__norank	p__Acidobacteria	c__Acidobacteria	o__norank_c__Acidobacteria	f__norank_c__Acidobacteria	g__norank_c__Acidobacteria	s__unclassified_g__norank_c__Acidobacteria	OTU1070	0	0	0	0	19	0	0	0	0	0	0	0	0	0	0	0	0	0	0	0	0	0	0	0	0	0	0	0	0	0	0	0	0	0	0	0	0	0	19
d__Bacteria	k__norank	p__Bacteroidetes	c__Bacteroidia	o__Bacteroidales	f__Porphyromonadaceae	g__norank_f__Porphyromonadaceae	s__uncultured_rumen_bacterium_g__norank_f__Porphyromonadaceae	OTU1028	0	0	0	15	82	20	0	0	0	0	0	0	0	0	0	0	0	0	0	0	0	0	0	0	0	0	0	0	0	0	0	0	0	0	0	0	0	0	117
d__Bacteria	k__norank	p__Proteobacteria	c__Betaproteobacteria	o__Rhodocyclales	f__Rhodocyclaceae	g__Dechloromonas	s__unclassified_g__Dechloromonas	OTU1729	11	1	0	0	0	2	0	0	0	0	0	0	0	3	0	0	0	0	444	364	246	243	236	124	48	87	72	95	2	3	0	2	3	0	0	0	0	0	1986
d__Bacteria	k__norank	p__Acidobacteria	c__Acidobacteria	o__Blastocatellales	f__Blastocatellaceae__Subgroup_4_	g__unclassified_f__Blastocatellaceae__Subgroup_4_	s__unclassified_f__Blastocatellaceae__Subgroup_4_	OTU1326	0	0	0	0	0	0	0	10	0	0	0	0	0	0	0	0	0	0	0	0	0	0	0	0	0	0	0	0	0	0	0	0	1	0	0	0	0	0	11
d__Bacteria	k__norank	p__Armatimonadetes	c__Chthonomonadetes	o__Chthonomonadales	f__Chthonomonadaceae	g__Chthonomonas	s__uncultured_bacterium_g__Chthonomonas	OTU916	0	0	0	0	6	0	0	0	0	0	0	0	0	0	0	0	0	0	0	0	0	0	0	0	0	0	0	0	0	0	0	0	0	0	0	0	0	0	6
d__Bacteria	k__norank	p__Cyanobacteria	c__Cyanobacteria	o__norank_c__Cyanobacteria	f__norank_c__Cyanobacteria	g__norank_c__Cyanobacteria	s__Chlorophyta_symbiont_of_Baikalospongia_sp._g__norank	OTU1449	0	0	0	0	0	0	0	0	0	0	0	0	0	0	0	0	0	0	3022	1852	2974	799	1020	1524	192	696	119	504	0	0	0	0	1	0	0	0	0	0	12703
d__Bacteria	k__norank	p__Tenericutes	c__Mollicutes	o__Mollicutes_RF9	f__norank_o__Mollicutes_RF9	g__norank_o__Mollicutes_RF9	s__unclassified_g__norank_o__Mollicutes_RF9	OTU817	0	0	0	0	24	0	0	0	0	0	0	0	0	0	0	0	0	0	0	0	0	0	0	0	0	0	0	0	0	0	0	0	0	0	0	0	0	0	24
d__Bacteria	k__norank	p__Bacteroidetes	c__Bacteroidia	o__Bacteroidales	f__unclassified_o__Bacteroidales	g__unclassified_o__Bacteroidales	s__unclassified_o__Bacteroidales	OTU637	0	0	0	5	0	0	0	0	0	0	0	0	0	0	0	0	0	0	0	0	0	0	0	0	0	0	0	0	0	0	0	0	0	0	0	0	0	0	5
d__Bacteria	k__norank	p__Cyanobacteria	c__Cyanobacteria	o__unclassified_c__Cyanobacteria	f__unclassified_c__Cyanobacteria	g__unclassified_c__Cyanobacteria	s__unclassified_c__Cyanobacteria	OTU1568	0	0	0	0	0	0	0	0	0	0	0	0	0	0	0	0	0	0	2	4	0	3	0	0	2	0	0	2	0	0	0	0	0	0	0	0	0	0	13
d__Bacteria	k__norank	p__Proteobacteria	c__Deltaproteobacteria	o__Desulfurellales	f__Desulfurellaceae	g__H16	s__uncultured_Dongia_sp._g__H16	OTU1520	0	0	0	0	0	0	0	0	0	0	0	0	0	0	0	0	0	0	4	8	5	3	1	4	1	1	2	2	0	0	0	1	0	0	0	0	0	0	32
d__Bacteria	k__norank	p__Spirochaetae	c__Spirochaetes	o__Spirochaetales	f__Spirochaetaceae	g__Treponema_2	s__unclassified_g__Treponema_2	OTU778	0	0	0	33	127	51	0	0	0	0	0	0	0	0	0	0	0	0	0	0	0	0	0	0	0	0	0	0	0	0	0	0	0	0	0	0	0	0	211
d__Bacteria	k__norank	p__Proteobacteria	c__Alphaproteobacteria	o__Rhodospirillales	f__Rhodospirillales_Incertae_Sedis	g__Reyranella	s__unclassified_g__Reyranella	OTU1866	1	0	0	0	1	0	0	0	0	0	0	0	0	2	0	0	0	0	14	23	24	15	17	14	2	5	2	8	0	4	0	0	50	0	0	0	0	0	182
d__Bacteria	k__norank	p__SR1__Absconditabacteria_	c__norank_p__SR1__Absconditabacteria_	o__norank_p__SR1__Absconditabacteria_	f__norank_p__SR1__Absconditabacteria_	g__norank_p__SR1__Absconditabacteria_	s__unclassified_g__norank_p__SR1__Absconditabacteria_	OTU823	0	7	0	25	21	33	0	0	0	0	0	0	0	0	0	0	0	0	0	0	0	0	0	0	0	0	0	0	0	0	0	0	0	0	0	0	0	0	86
d__Bacteria	k__norank	p__Proteobacteria	c__Gammaproteobacteria	o__Xanthomonadales	f__Xanthomonadaceae	g__Pseudoxanthomonas	s__Pseudoxanthomonas_mexicana	OTU224	21	6	0	0	0	0	0	0	1	0	0	0	0	11	1	0	0	0	0	0	0	0	0	0	0	0	0	0	0	0	0	0	0	0	0	0	0	0	40
d__Bacteria	k__norank	p__Gemmatimonadetes	c__Gemmatimonadetes	o__norank_c__Gemmatimonadetes	f__norank_c__Gemmatimonadetes	g__norank_c__Gemmatimonadetes	s__unclassified_g__norank_c__Gemmatimonadetes	OTU403	0	0	7	0	0	0	0	0	0	0	0	0	0	0	0	0	0	0	0	0	0	0	0	0	0	0	0	0	0	0	0	0	0	0	0	0	0	0	7
d__Bacteria	k__norank	p__Spirochaetae	c__Spirochaetes	o__Spirochaetales	f__Spirochaetaceae	g__Treponema_2	s__unclassified_g__Treponema_2	OTU776	0	2	1	32	47	41	0	0	0	0	0	0	0	0	0	0	0	0	0	0	0	0	0	0	0	0	0	0	0	0	0	0	0	0	0	0	0	0	123
d__Bacteria	k__norank	p__Bacteroidetes	c__Bacteroidia	o__Bacteroidales	f__Prevotellaceae	g__Prevotella_1	s__unclassified_g__Prevotella_1	OTU1176	0	0	0	0	0	8	0	0	0	0	0	0	0	0	0	0	0	0	0	0	0	0	0	0	0	0	0	0	0	0	0	0	0	0	0	0	0	0	8
d__Bacteria	k__norank	p__Chloroflexi	c__KD4-96	o__norank_c__KD4-96	f__norank_c__KD4-96	g__norank_c__KD4-96	s__uncultured_Chloroflexi_bacterium_g__norank_c__KD4-96	OTU1903	0	0	0	1	0	0	0	0	0	0	0	0	0	0	0	0	0	0	55	68	132	18	54	19	31	28	3	13	1	1	0	0	3	0	0	0	0	0	427
d__Bacteria	k__norank	p__Planctomycetes	c__Planctomycetacia	o__Planctomycetales	f__Planctomycetaceae	g__norank_f__Planctomycetaceae	s__bacterium_enrichment_culture_clone_B145_2011_	OTU1631	0	0	0	0	0	0	0	0	0	0	0	0	0	0	0	0	0	0	7	17	9	8	3	5	4	4	0	1	0	0	0	0	0	0	0	0	0	0	58
d__Bacteria	k__norank	p__Proteobacteria	c__Gammaproteobacteria	o__Enterobacteriales	f__Enterobacteriaceae	g__Enterobacter	s__unclassified_g__Enterobacter	OTU2165	0	0	0	0	0	0	0	0	0	0	0	0	0	0	0	0	0	0	0	0	0	0	0	0	0	0	0	0	0	1	0	0	0	0	10	43	0	23	77
d__Bacteria	k__norank	p__Actinobacteria	c__Actinobacteria	o__Coriobacteriales	f__Coriobacteriaceae	g__Collinsella	s__Collinsella_aerofaciens	OTU1299	0	0	0	0	0	0	6	0	0	1	0	0	0	0	0	0	0	0	0	0	0	0	0	0	0	0	0	0	0	0	0	0	0	0	0	1	0	0	8
d__Bacteria	k__norank	p__Acidobacteria	c__Acidobacteria	o__Solibacterales	f__Solibacteraceae__Subgroup_3_	g__Candidatus_Solibacter	s__unclassified_g__Candidatus_Solibacter	OTU415	0	0	12	0	0	0	0	0	0	0	0	0	0	0	0	0	0	0	0	0	0	0	0	0	0	0	0	0	0	0	0	0	0	0	0	0	0	0	12
d__Bacteria	k__norank	p__Firmicutes	c__Clostridia	o__Clostridiales	f__Ruminococcaceae	g__Ruminococcaceae_UCG-010	s__unclassified_g__Ruminococcaceae_UCG-010	OTU1017	0	0	0	0	31	2	0	0	0	0	0	0	0	0	0	0	0	0	0	0	0	0	0	0	0	0	0	0	0	0	0	0	0	0	0	0	0	0	33
d__Bacteria	k__norank	p__CPR2	c__norank_p__CPR2	o__norank_p__CPR2	f__norank_p__CPR2	g__norank_p__CPR2	s__uncultured_Firmicutes_bacterium_g__norank_p__CPR2	OTU1877	0	0	0	0	0	0	0	0	0	0	0	0	0	0	0	0	0	0	12	13	24	8	5	4	4	2	2	6	0	0	0	0	2	0	0	0	0	0	82
d__Bacteria	k__norank	p__Proteobacteria	c__Gammaproteobacteria	o__Xanthomonadales	f__Xanthomonadales_Incertae_Sedis	g__Candidatus_Competibacter	s__uncultured_bacterium_g__Candidatus_Competibacter	OTU1999	0	0	0	0	0	0	0	0	0	0	0	0	0	0	0	0	0	0	3	3	6	3	5	2	2	3	1	1	0	0	0	0	0	0	0	0	0	0	29
d__Bacteria	k__norank	p__TM6__Dependentiae_	c__norank_p__TM6__Dependentiae_	o__norank_p__TM6__Dependentiae_	f__norank_p__TM6__Dependentiae_	g__norank_p__TM6__Dependentiae_	s__uncultured_bacterium_g__norank_p__TM6__Dependentiae_	OTU1589	0	0	0	0	0	0	0	0	0	0	0	0	0	0	0	0	0	0	0	0	12	2	6	1	0	0	0	0	0	0	0	0	5	0	0	0	0	0	26
d__Bacteria	k__norank	p__Firmicutes	c__Bacilli	o__Lactobacillales	f__Lactobacillaceae	g__Lactobacillus	s__Lactobacillus_plantarum_subsp._plantarum	OTU259	0	16	0	0	0	0	0	0	0	0	0	0	0	0	0	0	0	0	0	0	0	0	0	0	0	0	0	0	0	0	0	0	0	0	0	0	0	0	16
d__Bacteria	k__norank	p__Proteobacteria	c__Gammaproteobacteria	o__Legionellales	f__Coxiellaceae	g__norank_f__Coxiellaceae	s__uncultured_gamma_proteobacterium_g__norank_f__Coxiellaceae	OTU2106	1	7	2	0	0	0	0	0	0	0	0	0	0	0	0	0	0	0	0	0	0	0	0	0	0	0	0	0	0	0	0	0	4	0	0	0	0	0	14
d__Bacteria	k__norank	p__unclassified_k__norank	c__unclassified_k__norank	o__unclassified_k__norank	f__unclassified_k__norank	g__unclassified_k__norank	s__unclassified_k__norank	OTU181	0	19	0	0	0	0	0	0	0	0	0	0	0	0	0	0	0	0	0	0	0	0	0	0	0	0	0	0	0	0	0	0	0	0	0	0	0	0	19
d__Bacteria	k__norank	p__Proteobacteria	c__Alphaproteobacteria	o__Rhodospirillales	f__Acetobacteraceae	g__Roseomonas	s__bacterium_EM0302	OTU1749	0	0	23	0	0	0	0	0	0	0	0	0	0	0	0	0	0	0	5	13	4	6	11	1	1	0	2	1	5	3	0	3	40	0	0	0	0	0	118
d__Bacteria	k__norank	p__Bacteroidetes	c__Bacteroidia	o__Bacteroidales	f__unclassified_o__Bacteroidales	g__unclassified_o__Bacteroidales	s__unclassified_o__Bacteroidales	OTU559	0	0	10	0	0	0	0	0	0	0	0	0	0	0	0	0	0	0	0	0	0	0	0	0	0	0	0	0	0	0	0	0	0	0	0	0	0	0	10
d__Bacteria	k__norank	p__Chloroflexi	c__Anaerolineae	o__Anaerolineales	f__Anaerolineaceae	g__norank_f__Anaerolineaceae	s__wastewater_metagenome_g__norank_f__Anaerolineaceae	OTU941	0	0	0	0	9	0	0	0	0	0	0	0	0	0	0	0	0	0	0	0	0	0	0	0	0	0	0	0	0	0	0	0	0	0	0	0	0	0	9
d__Bacteria	k__norank	p__Cyanobacteria	c__Cyanobacteria	o__norank_c__Cyanobacteria	f__norank_c__Cyanobacteria	g__norank_c__Cyanobacteria	s__Coelastrella_sp._M60_g__norank	OTU1910	0	0	0	0	0	0	0	0	0	0	0	0	0	0	0	0	0	0	30	30	35	4	5	16	9	7	2	32	0	0	0	0	0	0	0	0	0	0	170
d__Bacteria	k__norank	p__Firmicutes	c__Clostridia	o__Clostridiales	f__Lachnospiraceae	g__unclassified_f__Lachnospiraceae	s__unclassified_f__Lachnospiraceae	OTU1190	0	0	0	0	0	11	0	0	0	0	0	0	0	0	0	0	0	0	0	0	0	0	0	0	0	0	0	0	0	0	0	0	0	0	0	0	0	0	11
d__Bacteria	k__norank	p__Firmicutes	c__Clostridia	o__Clostridiales	f__Ruminococcaceae	g__Saccharofermentans	s__unclassified_g__Saccharofermentans	OTU366	0	0	95	77	198	58	0	0	0	0	1	0	0	0	0	0	0	0	0	0	0	0	0	0	0	0	0	0	0	0	0	0	0	0	0	0	0	0	429
d__Bacteria	k__norank	p__Proteobacteria	c__Gammaproteobacteria	o__Xanthomonadales	f__Xanthomonadaceae	g__Lysobacter	s__Lysobacter_soli	OTU373	0	0	12	0	0	0	0	0	0	0	0	0	0	0	0	0	0	0	0	0	0	1	0	0	0	0	0	0	0	0	0	0	0	0	0	0	0	0	13
d__Bacteria	k__norank	p__Chloroflexi	c__Thermomicrobia	o__JG30-KF-CM45	f__norank_o__JG30-KF-CM45	g__norank_o__JG30-KF-CM45	s__uncultured_Chloroflexi_bacterium_g__norank_o__JG30-KF-CM45	OTU147	9	0	0	0	0	0	0	0	0	0	0	0	0	0	0	0	0	0	1	0	0	0	1	0	0	0	0	0	0	0	0	0	0	0	0	0	0	0	11
d__Bacteria	k__norank	p__Proteobacteria	c__Deltaproteobacteria	o__Syntrophobacterales	f__Syntrophobacteraceae	g__Syntrophobacter	s__uncultured_soil_bacterium_g__Syntrophobacter	OTU2037	0	0	0	0	0	0	0	3	0	0	0	0	0	1	0	0	0	0	2	6	11	2	0	3	0	1	0	2	7	17	0	3	51	0	0	0	0	0	109
d__Bacteria	k__norank	p__Saccharibacteria	c__Unknown_Class_p__Saccharibacteria	o__Unknown_Order_c__Unknown_Class_p__Saccharibacteria	f__Unknown_Family_o__Unknown_Order_c__Unknown_Class_p__Saccharibacteria	g__Candidatus_Saccharimonas	s__uncultured_rumen_bacterium_g__Candidatus_Saccharimonas	OTU394	0	0	10	0	0	0	0	0	0	0	0	0	0	0	0	0	0	0	0	0	0	0	0	0	0	0	0	0	0	0	0	0	0	0	0	0	0	0	10
d__Bacteria	k__norank	p__Firmicutes	c__Bacilli	o__Bacillales	f__Bacillaceae	g__Bacillus	s__uncultured_Bacillales_bacterium_g__Bacillus	OTU434	0	8	1	0	0	0	0	0	0	0	0	0	0	0	0	0	0	0	0	0	0	0	0	0	0	0	0	0	0	0	0	0	0	0	0	0	0	0	9
d__Bacteria	k__norank	p__Bacteroidetes	c__Bacteroidia	o__Bacteroidales	f__Rikenellaceae	g__Rikenellaceae_RC9_gut_group	s__uncultured_bacterium_g__Rikenellaceae_RC9_gut_group	OTU1002	0	0	0	0	19	0	0	0	0	0	0	0	0	0	0	0	0	0	0	0	0	0	0	0	0	0	0	0	0	0	0	0	0	0	0	0	0	0	19
d__Bacteria	k__norank	p__Firmicutes	c__Clostridia	o__Clostridiales	f__Defluviitaleaceae	g__Defluviitaleaceae_UCG-011	s__uncultured_rumen_bacterium_g__Defluviitaleaceae_UCG-011	OTU362	0	13	20	0	0	0	0	0	0	0	0	0	0	0	0	0	0	0	0	0	0	0	0	0	0	0	0	0	0	0	0	0	0	0	0	0	0	0	33
d__Bacteria	k__norank	p__Proteobacteria	c__Gammaproteobacteria	o__Enterobacteriales	f__Enterobacteriaceae	g__Raoultella	s__unclassified_g__Raoultella	OTU1094	78	85	31	35	90	38	73	1	2	4	1	1	3	5	2	16	1	4	1	0	0	0	0	0	0	0	0	0	4	6	4	1	1	0	52	199	0	37	775
d__Bacteria	k__norank	p__Actinobacteria	c__Actinobacteria	o__Micromonosporales	f__Micromonosporaceae	g__Actinoplanes	s__Actinoplanes_missouriensis_431	OTU164	0	11	0	0	0	0	0	0	0	0	0	0	0	0	0	0	0	0	0	0	0	0	0	0	0	0	0	0	0	0	0	0	0	0	0	0	0	0	11
d__Bacteria	k__norank	p__Firmicutes	c__Clostridia	o__Clostridiales	f__Ruminococcaceae	g__Ruminococcaceae_NK4A214_group	s__unclassified_g__Ruminococcaceae_NK4A214_group	OTU187	0	97	57	102	191	52	0	3	0	0	0	0	0	0	0	0	0	0	0	1	0	0	0	0	0	0	0	1	0	0	0	0	0	0	0	0	0	0	504
d__Bacteria	k__norank	p__Bacteroidetes	c__Sphingobacteriia	o__Sphingobacteriales	f__Chitinophagaceae	g__Hydrotalea	s__uncultured_bacterium_g__Hydrotalea	OTU1262	0	0	0	0	0	0	3	0	0	0	0	0	0	0	0	0	0	0	0	0	0	0	0	0	0	0	0	0	0	0	0	0	0	0	0	0	0	0	3
d__Bacteria	k__norank	p__Proteobacteria	c__Betaproteobacteria	o__Burkholderiales	f__Burkholderiaceae	g__Burkholderia-Paraburkholderia	s__unclassified_g__Burkholderia-Paraburkholderia	OTU1838	2	4	0	0	8	2	4	0	0	0	0	0	0	0	0	0	0	0	0	0	0	0	10	0	0	1	0	0	0	0	0	0	4	0	0	0	11	0	46
d__Bacteria	k__norank	p__Proteobacteria	c__Gammaproteobacteria	o__Xanthomonadales	f__Solimonadaceae	g__unclassified_f__Solimonadaceae	s__unclassified_f__Solimonadaceae	OTU307	13	0	12	0	0	0	0	0	0	0	0	0	0	0	0	0	0	0	0	0	0	0	0	0	0	0	0	0	0	0	0	0	0	0	0	0	0	0	25
d__Bacteria	k__norank	p__Planctomycetes	c__Planctomycetacia	o__Planctomycetales	f__Planctomycetaceae	g__unclassified_f__Planctomycetaceae	s__unclassified_f__Planctomycetaceae	OTU1713	0	0	0	0	0	0	0	0	0	0	0	0	0	0	0	0	0	0	5	3	4	2	0	0	0	0	0	1	0	0	0	0	0	0	0	0	0	0	15
d__Bacteria	k__norank	p__Actinobacteria	c__Actinobacteria	o__Gaiellales	f__norank_o__Gaiellales	g__norank_o__Gaiellales	s__uncultured_organism_g__norank_o__Gaiellales	OTU1855	0	0	0	0	0	0	0	0	0	0	0	0	0	1	0	0	0	0	2	0	6	2	2	1	1	3	0	0	0	1	0	0	10	0	0	0	0	0	29
d__Bacteria	k__norank	p__Proteobacteria	c__Alphaproteobacteria	o__Rhizobiales	f__Hyphomicrobiaceae	g__Rhodoplanes	s__Rhodoplanes_roseus	OTU2126	0	3	1	4	0	0	0	0	0	0	0	0	0	0	0	0	0	0	0	1	0	1	1	1	1	1	0	0	2	1	0	0	196	0	0	0	0	0	213
d__Bacteria	k__norank	p__Tenericutes	c__Mollicutes	o__Mollicutes_RF9	f__norank_o__Mollicutes_RF9	g__norank_o__Mollicutes_RF9	s__unidentified_rumen_bacterium_RF8	OTU824	0	0	0	0	20	3	0	0	0	0	0	0	0	0	0	0	0	0	0	0	0	0	0	0	0	0	0	0	0	0	0	0	0	0	0	0	0	0	23
d__Bacteria	k__norank	p__Firmicutes	c__Clostridia	o__Clostridiales	f__Peptostreptococcaceae	g__Paeniclostridium	s__uncultured_bacterium_g__Paeniclostridium	OTU1693	0	0	0	0	0	0	0	3	0	0	1	0	0	0	0	0	0	0	30	21	69	10	36	3	1	12	5	10	0	1	0	1	11	0	0	0	0	0	214
d__Bacteria	k__norank	p__Firmicutes	c__Clostridia	o__Clostridiales	f__Christensenellaceae	g__Christensenellaceae_R-7_group	s__uncultured_bacterium_g__Christensenellaceae_R-7_group	OTU311	0	8	31	20	16	32	0	0	0	0	0	0	0	0	0	0	0	0	0	0	0	0	0	0	0	0	0	0	0	0	0	0	0	0	0	0	0	0	107
d__Bacteria	k__norank	p__Bacteroidetes	c__Bacteroidia	o__Bacteroidales	f__Prevotellaceae	g__Prevotella_1	s__uncultured_rumen_bacterium_g__Prevotella_1	OTU1019	0	0	0	6	38	17	0	0	0	0	0	0	0	0	0	0	0	0	0	0	0	0	0	0	0	0	0	0	0	0	0	0	0	0	0	0	0	0	61
d__Bacteria	k__norank	p__Bacteroidetes	c__Flavobacteriia	o__Flavobacteriales	f__Flavobacteriaceae	g__Actibacter	s__uncultured_prokaryote_g__Actibacter	OTU1494	0	0	0	0	0	0	0	0	0	0	0	0	0	0	0	0	0	0	0	20	0	2	1	0	0	0	2	0	0	0	0	0	0	0	0	0	0	0	25
d__Bacteria	k__norank	p__Synergistetes	c__Synergistia	o__Synergistales	f__Synergistaceae	g__norank_f__Synergistaceae	s__unclassified_g__norank_f__Synergistaceae	OTU745	0	0	0	3	0	0	0	0	0	0	0	0	0	0	0	0	0	0	0	0	0	0	0	0	0	0	0	0	0	0	0	0	0	0	0	0	0	0	3
d__Bacteria	k__norank	p__Bacteroidetes	c__Bacteroidia	o__Bacteroidales	f__Bacteroidales_BS11_gut_group	g__norank_f__Bacteroidales_BS11_gut_group	s__uncultured_bacterium_g__norank_f__Bacteroidales_BS11_gut_group	OTU301	0	0	21	2	0	1	0	0	0	0	0	0	0	0	0	0	0	0	0	0	0	0	0	0	0	0	0	0	0	0	0	0	0	0	0	0	0	0	24
d__Bacteria	k__norank	p__Bacteroidetes	c__Bacteroidia	o__Bacteroidales	f__Bacteroidales_S24-7_group	g__norank_f__Bacteroidales_S24-7_group	s__uncultured_rumen_bacterium_g__norank_f__Bacteroidales_S24-7_group	OTU850	0	4	8	36	60	34	0	0	0	0	0	0	0	0	0	0	0	0	0	0	0	0	0	0	0	0	0	0	0	0	0	0	0	0	0	0	0	0	142
d__Bacteria	k__norank	p__Actinobacteria	c__Actinobacteria	o__Gaiellales	f__norank_o__Gaiellales	g__norank_o__Gaiellales	s__unclassified_g__norank_o__Gaiellales	OTU1540	0	0	0	0	0	0	0	0	0	0	0	0	0	0	0	0	0	0	2	9	16	5	6	2	6	5	1	2	0	1	0	0	0	0	0	0	0	0	55
d__Bacteria	k__norank	p__Actinobacteria	c__Actinobacteria	o__Propionibacteriales	f__Propionibacteriaceae	g__Luteococcus	s__uncultured_bacterium_g__Luteococcus	OTU2075	0	0	0	0	0	0	8	3	0	0	0	0	0	0	0	0	0	0	0	0	0	0	0	0	0	0	0	0	5	8	0	1	120	0	0	0	0	0	145
d__Bacteria	k__norank	p__Gemmatimonadetes	c__Gemmatimonadetes	o__Gemmatimonadales	f__Gemmatimonadaceae	g__norank_f__Gemmatimonadaceae	s__uncultured_Gemmatimonadetes_bacterium_g__norank_f__Gemmatimonadaceae	OTU130	20	0	0	0	0	0	0	0	0	0	0	0	0	0	0	0	0	0	0	0	0	0	0	0	0	0	0	0	0	0	0	0	0	0	0	0	0	0	20
d__Bacteria	k__norank	p__Saccharibacteria	c__norank_p__Saccharibacteria	o__norank_p__Saccharibacteria	f__norank_p__Saccharibacteria	g__norank_p__Saccharibacteria	s__uncultured_bacterium_g__norank_p__Saccharibacteria	OTU2125	0	0	0	0	6	0	0	0	0	0	0	0	0	0	0	0	0	0	0	0	0	0	0	0	0	0	0	0	6	9	0	5	92	0	0	0	0	0	118
d__Bacteria	k__norank	p__Proteobacteria	c__Betaproteobacteria	o__Nitrosomonadales	f__Nitrosomonadaceae	g__norank_f__Nitrosomonadaceae	s__unclassified_g__norank_f__Nitrosomonadaceae	OTU1750	0	0	0	0	0	0	0	0	0	0	0	0	0	0	0	0	0	0	0	10	17	7	14	0	3	1	2	1	0	0	0	0	0	0	0	0	0	0	55
d__Bacteria	k__norank	p__Firmicutes	c__Clostridia	o__Clostridiales	f__Family_XIII	g__[Eubacterium]_nodatum_group	s__unclassified_g__[Eubacterium]_nodatum_group	OTU1348	0	0	0	0	0	0	1	31	0	1	1	0	0	0	0	0	0	0	0	0	0	0	0	0	0	0	0	0	0	2	0	0	1	0	0	0	0	0	37
d__Bacteria	k__norank	p__Firmicutes	c__Clostridia	o__Clostridiales	f__Defluviitaleaceae	g__Defluviitaleaceae_UCG-011	s__uncultured_rumen_bacterium_g__Defluviitaleaceae_UCG-011	OTU669	0	0	24	7	0	0	0	0	0	0	0	0	0	0	0	0	0	0	0	0	0	0	0	0	0	0	0	0	0	0	0	0	0	0	0	0	0	0	31
d__Bacteria	k__norank	p__Actinobacteria	c__Actinobacteria	o__Micrococcales	f__Intrasporangiaceae	g__Tetrasphaera	s__uncultured_bacterium_g__Tetrasphaera	OTU2070	0	0	1	0	0	0	0	2	0	0	1	0	0	0	0	0	0	0	1	0	0	1	0	1	0	0	0	0	52	69	2	57	1822	0	0	0	0	0	2009
d__Bacteria	k__norank	p__Tenericutes	c__Mollicutes	o__Anaeroplasmatales	f__Anaeroplasmataceae	g__Anaeroplasma	s__uncultured_rumen_bacterium_g__Anaeroplasma	OTU512	0	0	21	0	5	3	0	0	0	0	0	0	0	0	0	0	0	0	0	0	0	0	0	0	0	0	0	0	0	0	0	0	0	0	0	0	0	0	29
d__Bacteria	k__norank	p__Proteobacteria	c__Gammaproteobacteria	o__Vibrionales	f__Vibrionaceae	g__Vibrio	s__Vibrio_metschnikovii	OTU2158	0	0	0	0	0	0	3	0	0	0	0	0	0	0	0	0	0	0	0	0	0	0	0	0	0	0	0	0	0	0	0	0	0	0	0	0	8	0	11
d__Bacteria	k__norank	p__Planctomycetes	c__Phycisphaerae	o__Phycisphaerales	f__AKAU3564_sediment_group	g__norank_f__AKAU3564_sediment_group	s__unclassified_g__norank_f__AKAU3564_sediment_group	OTU1528	0	0	0	0	0	0	0	0	0	0	0	0	0	0	0	0	0	0	2	1	0	0	0	1	0	0	0	0	0	0	0	0	0	0	0	0	0	0	4
d__Bacteria	k__norank	p__Planctomycetes	c__Planctomycetacia	o__Planctomycetales	f__Planctomycetaceae	g__norank_f__Planctomycetaceae	s__unclassified_g__norank_f__Planctomycetaceae	OTU1454	0	0	0	0	0	0	0	0	0	0	0	0	0	3	0	0	0	0	2102	2146	1635	605	501	1241	318	337	98	293	0	0	0	0	3	0	0	0	2	0	9284
d__Bacteria	k__norank	p__Proteobacteria	c__Deltaproteobacteria	o__Desulfovibrionales	f__Desulfovibrionaceae	g__Desulfovibrio	s__Desulfovibrio_cuneatus	OTU1751	0	0	0	0	0	0	0	0	0	0	0	0	0	0	0	0	0	0	0	0	0	8	0	0	0	0	0	0	0	0	0	0	0	0	0	0	0	0	8
d__Bacteria	k__norank	p__Bacteroidetes	c__Bacteroidia	o__Bacteroidales	f__Bacteroidales_S24-7_group	g__norank_f__Bacteroidales_S24-7_group	s__uncultured_rumen_bacterium_g__norank_f__Bacteroidales_S24-7_group	OTU1139	0	18	41	66	158	60	0	0	0	0	0	0	0	0	0	0	0	0	0	0	0	0	0	0	0	0	0	0	0	0	0	0	0	0	0	0	0	0	343
d__Bacteria	k__norank	p__Bacteroidetes	c__Sphingobacteriia	o__Sphingobacteriales	f__Sphingobacteriaceae	g__Sphingobacterium	s__unclassified_g__Sphingobacterium	OTU201	44	24	8	0	0	15	0	0	0	2	9	0	0	0	0	0	0	0	0	0	0	0	0	0	0	0	0	0	0	0	0	0	0	0	0	0	0	0	102
d__Bacteria	k__norank	p__Proteobacteria	c__Alphaproteobacteria	o__Rhizobiales	f__Hyphomicrobiaceae	g__Prosthecomicrobium	s__uncultured_bacterium_g__Prosthecomicrobium	OTU1791	0	0	0	0	0	0	0	0	0	0	0	0	0	0	0	0	0	0	1	6	10	3	9	1	0	1	0	0	0	0	0	0	0	0	0	0	0	0	31
d__Bacteria	k__norank	p__Bacteroidetes	c__Bacteroidia	o__Bacteroidales	f__Prevotellaceae	g__Prevotellaceae_UCG-004	s__uncultured_rumen_bacterium_4C0d-8	OTU844	0	0	0	4	56	27	0	0	0	0	0	0	0	0	0	0	0	0	0	0	0	0	0	0	0	0	0	0	0	0	0	0	0	0	0	0	0	0	87
d__Bacteria	k__norank	p__Proteobacteria	c__Alphaproteobacteria	o__Rhodospirillales	f__Rhodospirillales_Incertae_Sedis	g__Reyranella	s__unclassified_g__Reyranella	OTU1521	0	0	0	0	1	0	0	0	0	0	0	0	0	0	0	0	0	0	4	5	10	6	9	3	1	1	2	2	1	1	0	1	7	0	0	0	1	0	55
d__Bacteria	k__norank	p__Firmicutes	c__Clostridia	o__Clostridiales	f__Ruminococcaceae	g__[Eubacterium]_coprostanoligenes_group	s__uncultured_rumen_bacterium_3C0d-3	OTU945	0	0	4	0	20	0	0	0	0	0	0	0	0	0	0	0	0	0	0	0	0	0	0	0	0	0	0	0	0	0	0	0	0	0	0	0	0	0	24
d__Bacteria	k__norank	p__Verrucomicrobia	c__Spartobacteria	o__Chthoniobacterales	f__Chthoniobacteraceae	g__Chthoniobacter	s__uncultured_Verrucomicrobia_bacterium_g__Chthoniobacter	OTU2002	0	0	0	0	0	0	0	0	0	0	1	0	0	0	0	0	0	0	10	7	4	3	1	2	0	2	0	1	0	0	0	0	0	0	0	0	0	0	31
d__Bacteria	k__norank	p__Proteobacteria	c__Alphaproteobacteria	o__Rhodospirillales	f__Acetobacteraceae	g__unclassified_f__Acetobacteraceae	s__unclassified_f__Acetobacteraceae	OTU1264	1	1	0	0	0	2	7	5	0	0	1	0	0	0	0	0	0	0	0	0	0	0	0	0	0	0	0	0	3	4	0	0	16	0	0	0	0	0	40
d__Bacteria	k__norank	p__Proteobacteria	c__Deltaproteobacteria	o__Sva0485	f__norank_o__Sva0485	g__norank_o__Sva0485	s__unclassified_g__norank_o__Sva0485	OTU1884	0	0	0	0	0	0	0	0	0	0	0	0	0	0	0	0	0	0	6	2	1	3	0	1	1	0	0	0	0	0	1	0	0	0	0	0	0	0	15
d__Bacteria	k__norank	p__Actinobacteria	c__Actinobacteria	o__Frankiales	f__Sporichthyaceae	g__Sporichthya	s__uncultured_bacterium_g__Sporichthya	OTU1123	0	0	0	0	0	10	0	0	0	0	0	0	0	0	0	0	0	0	0	0	0	0	0	0	0	0	0	0	0	0	0	0	0	0	0	0	0	0	10
d__Bacteria	k__norank	p__Proteobacteria	c__Deltaproteobacteria	o__Desulfuromonadales	f__Geobacteraceae	g__Geobacter	s__unclassified_g__Geobacter	OTU159	15	0	0	0	0	0	0	0	0	0	0	0	0	0	0	0	0	0	0	0	0	0	0	0	0	0	0	0	0	0	0	0	0	0	0	0	0	0	15
d__Bacteria	k__norank	p__Chloroflexi	c__Anaerolineae	o__Anaerolineales	f__Anaerolineaceae	g__Anaerolinea	s__uncultured_bacterium_g__Anaerolinea	OTU138	15	0	20	0	0	0	0	0	0	0	0	0	0	0	0	0	0	0	0	0	0	0	0	0	0	0	0	0	0	0	0	0	0	0	0	0	0	0	35
d__Bacteria	k__norank	p__Spirochaetae	c__Spirochaetes	o__Spirochaetales	f__Spirochaetaceae	g__Treponema_2	s__unclassified_g__Treponema_2	OTU1222	0	1	47	6	40	10	0	0	0	0	0	0	0	0	0	0	0	0	0	0	0	0	0	0	0	0	0	0	0	0	0	0	0	0	0	0	0	0	104
d__Bacteria	k__norank	p__Planctomycetes	c__Planctomycetacia	o__Planctomycetales	f__Planctomycetaceae	g__unclassified_f__Planctomycetaceae	s__unclassified_f__Planctomycetaceae	OTU961	0	0	0	0	9	0	0	0	0	0	0	0	0	0	0	0	0	0	0	0	0	0	0	0	0	0	0	0	0	0	0	0	0	0	0	0	0	0	9
d__Bacteria	k__norank	p__Proteobacteria	c__Deltaproteobacteria	o__Desulfurellales	f__Desulfurellaceae	g__H16	s__unclassified_g__H16	OTU1922	0	0	0	0	0	0	0	0	0	1	0	0	0	0	0	0	0	0	2	2	1	0	0	0	0	2	0	0	0	0	0	0	0	0	0	0	0	0	8
d__Bacteria	k__norank	p__Proteobacteria	c__Alphaproteobacteria	o__Rhizobiales	f__Methylobacteriaceae	g__Meganema	s__uncultured_bacterium_g__Meganema	OTU2034	0	1	0	4	1	3	0	1	6	0	0	0	2	5	0	0	1	0	0	0	0	0	0	0	0	0	0	0	3	6	0	1	68	0	0	0	1	0	103
d__Bacteria	k__norank	p__Bacteroidetes	c__Sphingobacteriia	o__Sphingobacteriales	f__Lentimicrobiaceae	g__norank_f__Lentimicrobiaceae	s__unclassified_g__norank_f__Lentimicrobiaceae	OTU593	0	0	37	0	0	0	0	0	0	0	0	0	0	0	0	0	0	0	0	0	0	1	0	0	0	0	0	0	0	0	0	0	0	0	0	0	0	0	38
d__Bacteria	k__norank	p__Gemmatimonadetes	c__Gemmatimonadetes	o__Gemmatimonadales	f__Gemmatimonadaceae	g__norank_f__Gemmatimonadaceae	s__Gemmatimonadetes_bacterium_LX87	OTU430	0	0	14	0	0	0	0	0	0	0	0	0	0	0	0	0	0	0	0	0	0	0	0	0	0	0	0	0	0	0	0	0	0	0	0	0	0	0	14
d__Bacteria	k__norank	p__Firmicutes	c__Clostridia	o__Clostridiales	f__Family_XIII	g__Anaerovorax	s__uncultured_rumen_bacterium_g__Anaerovorax	OTU484	0	4	94	81	88	13	0	0	0	0	0	0	0	0	0	0	0	0	0	0	0	0	0	0	0	0	0	0	0	0	0	0	0	0	0	0	0	0	280
d__Bacteria	k__norank	p__Firmicutes	c__Clostridia	o__Clostridiales	f__Clostridiaceae_1	g__Clostridium_sensu_stricto_7	s__uncultured_Clostridium_sp._g__Clostridium_sensu_stricto_7	OTU2122	0	0	0	0	0	0	0	0	0	0	0	0	0	0	0	0	0	0	0	0	4	0	1	0	0	0	0	0	0	1	0	0	24	0	0	0	0	0	30
d__Bacteria	k__norank	p__Bacteroidetes	c__Bacteroidia	o__Bacteroidales	f__Prevotellaceae	g__Prevotella_1	s__uncultured_rumen_bacterium_g__Prevotella_1	OTU635	0	0	0	3	16	10	0	0	0	0	0	0	0	0	0	0	0	0	0	0	0	0	0	0	0	0	0	0	0	0	0	0	0	0	0	0	0	0	29
d__Bacteria	k__norank	p__Proteobacteria	c__Betaproteobacteria	o__Burkholderiales	f__Comamonadaceae	g__norank_f__Comamonadaceae	s__uncultured_Comamonadaceae_bacterium_g__norank	OTU155	17	0	0	0	0	0	0	0	0	0	0	0	0	0	0	0	0	0	0	0	0	0	0	0	0	0	0	0	0	0	0	0	0	0	0	0	0	0	17
d__Bacteria	k__norank	p__Bacteroidetes	c__Bacteroidia	o__Bacteroidales	f__Rikenellaceae	g__Rikenellaceae_RC9_gut_group	s__unidentified_rumen_bacterium_RF15	OTU1165	0	6	54	17	116	54	0	0	0	0	0	0	0	0	0	0	0	0	0	0	0	0	0	0	0	0	0	0	0	0	0	0	0	0	0	0	0	0	247
d__Bacteria	k__norank	p__Fusobacteria	c__Fusobacteriia	o__Fusobacteriales	f__Hados.Sed.Eubac.3	g__norank_f__Hados.Sed.Eubac.3	s__uncultured_bacterium_g__norank_f__Hados.Sed.Eubac.3	OTU1941	0	0	0	0	0	0	0	0	0	0	0	0	0	1	0	0	0	0	175	1778	422	539	235	67	2175	2399	1080	538	1	3	0	2	8	0	0	0	0	0	9423
d__Bacteria	k__norank	p__Nitrospirae	c__Nitrospira	o__norank_c__Nitrospira	f__norank_c__Nitrospira	g__Nitrospira	s__unclassified_g__Nitrospira	OTU94	14	0	0	0	0	0	0	1	0	0	0	0	0	0	0	0	0	0	0	0	0	0	0	0	0	0	0	0	0	0	0	0	0	0	0	0	0	0	15
d__Bacteria	k__norank	p__Chloroflexi	c__Anaerolineae	o__Anaerolineales	f__Anaerolineaceae	g__norank_f__Anaerolineaceae	s__unclassified_g__norank_f__Anaerolineaceae	OTU1914	0	0	0	0	0	0	0	0	0	0	0	0	0	0	0	0	0	0	22	28	35	12	9	7	2	10	0	8	0	0	0	0	0	0	0	0	0	0	133
d__Bacteria	k__norank	p__Actinobacteria	c__Actinobacteria	o__Coriobacteriales	f__Coriobacteriaceae	g__norank_f__Coriobacteriaceae	s__unclassified_g__norank_f__Coriobacteriaceae	OTU1499	0	0	0	0	0	0	0	0	0	0	0	0	0	0	0	0	0	0	22	13	33	7	15	4	2	6	0	7	0	0	0	0	0	0	0	0	0	0	109
d__Bacteria	k__norank	p__Proteobacteria	c__Betaproteobacteria	o__Burkholderiales	f__Alcaligenaceae	g__norank_f__Alcaligenaceae	s__uncultured_prokaryote_g__norank_f__Alcaligenaceae	OTU1755	1	0	7	1	0	0	0	0	0	0	0	0	0	0	0	0	0	0	255	169	75	201	111	75	34	45	54	86	0	0	0	0	3	0	0	0	0	0	1117
d__Bacteria	k__norank	p__unclassified_k__norank	c__unclassified_k__norank	o__unclassified_k__norank	f__unclassified_k__norank	g__unclassified_k__norank	s__unclassified_k__norank	OTU536	0	0	31	0	0	0	0	0	0	0	0	0	0	0	0	0	0	0	0	0	0	0	0	0	0	0	0	0	0	0	0	0	0	0	0	0	0	0	31
d__Bacteria	k__norank	p__Proteobacteria	c__Deltaproteobacteria	o__Sva0485	f__norank_o__Sva0485	g__norank_o__Sva0485	s__uncultured_prokaryote_g__norank_o__Sva0485	OTU1501	0	0	0	0	0	0	0	0	0	0	0	0	0	0	0	0	0	0	58	44	25	25	10	14	3	13	3	9	0	0	0	0	1	0	0	0	0	0	205
d__Bacteria	k__norank	p__Proteobacteria	c__Deltaproteobacteria	o__Sva0485	f__norank_o__Sva0485	g__norank_o__Sva0485	s__uncultured_prokaryote_g__norank_o__Sva0485	OTU1504	0	0	0	0	0	0	0	0	0	0	0	0	0	0	0	0	0	0	53	37	17	24	14	26	7	9	5	10	0	0	0	0	0	0	0	0	0	0	202
d__Bacteria	k__norank	p__Bacteroidetes	c__Bacteroidia	o__Bacteroidales	f__unclassified_o__Bacteroidales	g__unclassified_o__Bacteroidales	s__unclassified_o__Bacteroidales	OTU543	0	0	12	6	12	0	0	0	0	0	0	0	0	0	0	0	0	0	0	0	0	0	0	0	0	0	0	0	0	0	0	0	0	0	0	0	0	0	30
d__Bacteria	k__norank	p__Bacteroidetes	c__Bacteroidia	o__Bacteroidales	f__Rikenellaceae	g__Rikenellaceae_RC9_gut_group	s__uncultured_bacterium_g__Rikenellaceae_RC9_gut_group	OTU769	0	0	8	5	24	21	0	0	0	0	0	0	0	0	0	0	0	0	0	0	0	0	0	0	0	0	0	0	0	0	0	0	0	0	0	0	0	0	58
d__Bacteria	k__norank	p__Bacteroidetes	c__Bacteroidia	o__Bacteroidales	f__Prevotellaceae	g__unclassified_f__Prevotellaceae	s__unclassified_f__Prevotellaceae	OTU299	0	0	10	7	0	0	0	0	0	0	0	0	0	0	0	0	0	0	0	0	0	0	0	0	0	0	0	0	0	0	0	0	0	0	0	0	0	0	17
d__Bacteria	k__norank	p__Proteobacteria	c__Gammaproteobacteria	o__unclassified_c__Gammaproteobacteria	f__unclassified_c__Gammaproteobacteria	g__unclassified_c__Gammaproteobacteria	s__unclassified_c__Gammaproteobacteria	OTU1798	0	0	0	0	0	0	0	0	0	0	0	0	0	0	0	0	0	0	1	2	1	0	4	0	0	0	0	1	0	0	0	0	0	0	0	0	0	0	9
d__Bacteria	k__norank	p__Bacteroidetes	c__Sphingobacteriia	o__Sphingobacteriales	f__unclassified_o__Sphingobacteriales	g__unclassified_o__Sphingobacteriales	s__unclassified_o__Sphingobacteriales	OTU605	0	0	14	0	0	0	0	0	0	0	0	0	0	0	0	0	0	0	0	0	0	0	0	0	0	0	0	0	0	0	0	0	0	0	0	0	0	0	14
d__Bacteria	k__norank	p__Firmicutes	c__Erysipelotrichia	o__Erysipelotrichales	f__Erysipelotrichaceae	g__norank_f__Erysipelotrichaceae	s__uncultured_rumen_bacterium_g__norank_f__Erysipelotrichaceae	OTU480	0	0	15	0	13	4	0	0	0	0	0	0	0	0	0	0	0	0	0	0	0	0	0	0	0	0	0	0	0	0	0	0	0	0	0	0	0	0	32
d__Bacteria	k__norank	p__Bacteroidetes	c__Cytophagia	o__Cytophagales	f__Cytophagaceae	g__Pontibacter	s__Pontibacter_populi	OTU162	0	5	0	0	0	0	0	0	0	0	0	0	0	0	0	0	0	0	0	0	0	0	0	0	0	0	0	0	0	0	0	0	0	0	0	0	0	0	5
d__Bacteria	k__norank	p__Cyanobacteria	c__Cyanobacteria	o__norank_c__Cyanobacteria	f__norank_c__Cyanobacteria	g__norank_c__Cyanobacteria	s__unclassified_g__norank_c__Cyanobacteria	OTU1531	0	0	0	0	0	0	0	0	0	0	0	0	0	0	0	0	0	0	3	1	5	3	0	0	0	0	1	1	0	0	0	0	0	0	0	0	0	0	14
d__Bacteria	k__norank	p__Bacteroidetes	c__Bacteroidia	o__Bacteroidales	f__Porphyromonadaceae	g__Proteiniphilum	s__anaerobic_digester_metagenome_g__Proteiniphilum	OTU1801	0	0	0	0	0	0	0	0	0	0	0	0	0	0	0	0	0	0	0	0	0	0	40	0	0	0	0	0	0	0	0	0	0	0	0	0	0	0	40
d__Bacteria	k__norank	p__Lentisphaerae	c__Oligosphaeria	o__Oligosphaerales	f__Oligosphaeraceae	g__Z20	s__uncultured_rumen_bacterium_g__Z20	OTU783	0	0	0	0	42	3	0	0	0	0	0	0	0	0	0	0	0	0	0	0	0	0	0	0	0	0	0	0	0	0	0	0	0	0	0	0	0	0	45
d__Bacteria	k__norank	p__Actinobacteria	c__Actinobacteria	o__Acidimicrobiales	f__Acidimicrobiaceae	g__norank_f__Acidimicrobiaceae	s__unclassified_g__norank_f__Acidimicrobiaceae	OTU1643	0	0	0	0	0	0	0	0	0	0	0	0	0	0	0	0	0	0	4	4	7	3	4	2	2	1	0	2	0	0	0	0	0	0	0	0	0	0	29
d__Bacteria	k__norank	p__Firmicutes	c__Clostridia	o__Clostridiales	f__Eubacteriaceae	g__Anaerofustis	s__uncultured_bacterium_g__Anaerofustis	OTU849	0	0	0	0	10	0	0	0	0	0	0	0	0	0	0	0	0	0	0	0	0	0	0	0	0	0	0	0	0	0	0	0	0	0	0	0	0	0	10
d__Bacteria	k__norank	p__Proteobacteria	c__Betaproteobacteria	o__Burkholderiales	f__Comamonadaceae	g__Hydrogenophaga	s__uncultured_soil_bacterium_g__Hydrogenophaga	OTU58	82	0	0	24	0	3	1	0	0	0	0	0	0	0	0	0	0	0	0	0	0	0	0	0	0	0	0	0	1	0	0	0	1	0	0	0	0	0	112
d__Bacteria	k__norank	p__Actinobacteria	c__Actinobacteria	o__Propionibacteriales	f__Nocardioidaceae	g__Nocardioides	s__Nocardioides_plantarum	OTU1374	0	0	0	0	0	0	0	0	0	0	7	0	0	0	0	0	0	0	0	0	0	0	0	0	0	0	0	0	0	0	0	0	5	0	0	1	0	0	13
d__Bacteria	k__norank	p__Firmicutes	c__Bacilli	o__Bacillales	f__Bacillaceae	g__Pseudogracilibacillus	s__uncultured_bacterium_g__Pseudogracilibacillus	OTU1590	0	0	0	0	0	0	0	0	0	0	0	0	0	0	0	0	0	0	0	0	3	0	0	0	0	0	0	0	0	0	0	0	0	0	0	0	0	0	3
d__Bacteria	k__norank	p__Chloroflexi	c__KD4-96	o__norank_c__KD4-96	f__norank_c__KD4-96	g__norank_c__KD4-96	s__uncultured_Chloroflexi_bacterium_g__norank_c__KD4-96	OTU248	0	7	0	0	0	0	0	0	0	0	0	0	0	0	0	0	0	0	0	0	0	0	0	0	0	0	0	0	0	0	0	0	0	0	0	0	0	0	7
d__Bacteria	k__norank	p__unclassified_k__norank	c__unclassified_k__norank	o__unclassified_k__norank	f__unclassified_k__norank	g__unclassified_k__norank	s__unclassified_k__norank	OTU689	0	0	0	9	0	0	0	0	0	0	0	0	0	0	0	0	0	0	0	0	0	0	0	0	0	0	0	0	0	0	0	0	0	0	0	0	0	0	9
[truncated: 614 more rows]
